# Supplementary material for: Dissection of affinity captured LINE-1 macromolecular complexes
Source: eLife journal article supplement (doi:10.7554/elife.30094), 2018-01-08

**Figure 4-S1**

— Linking experiments: same protein  
— I-DIRT hit, significantly different  
— I-DIRT hit, not significantly different

**A**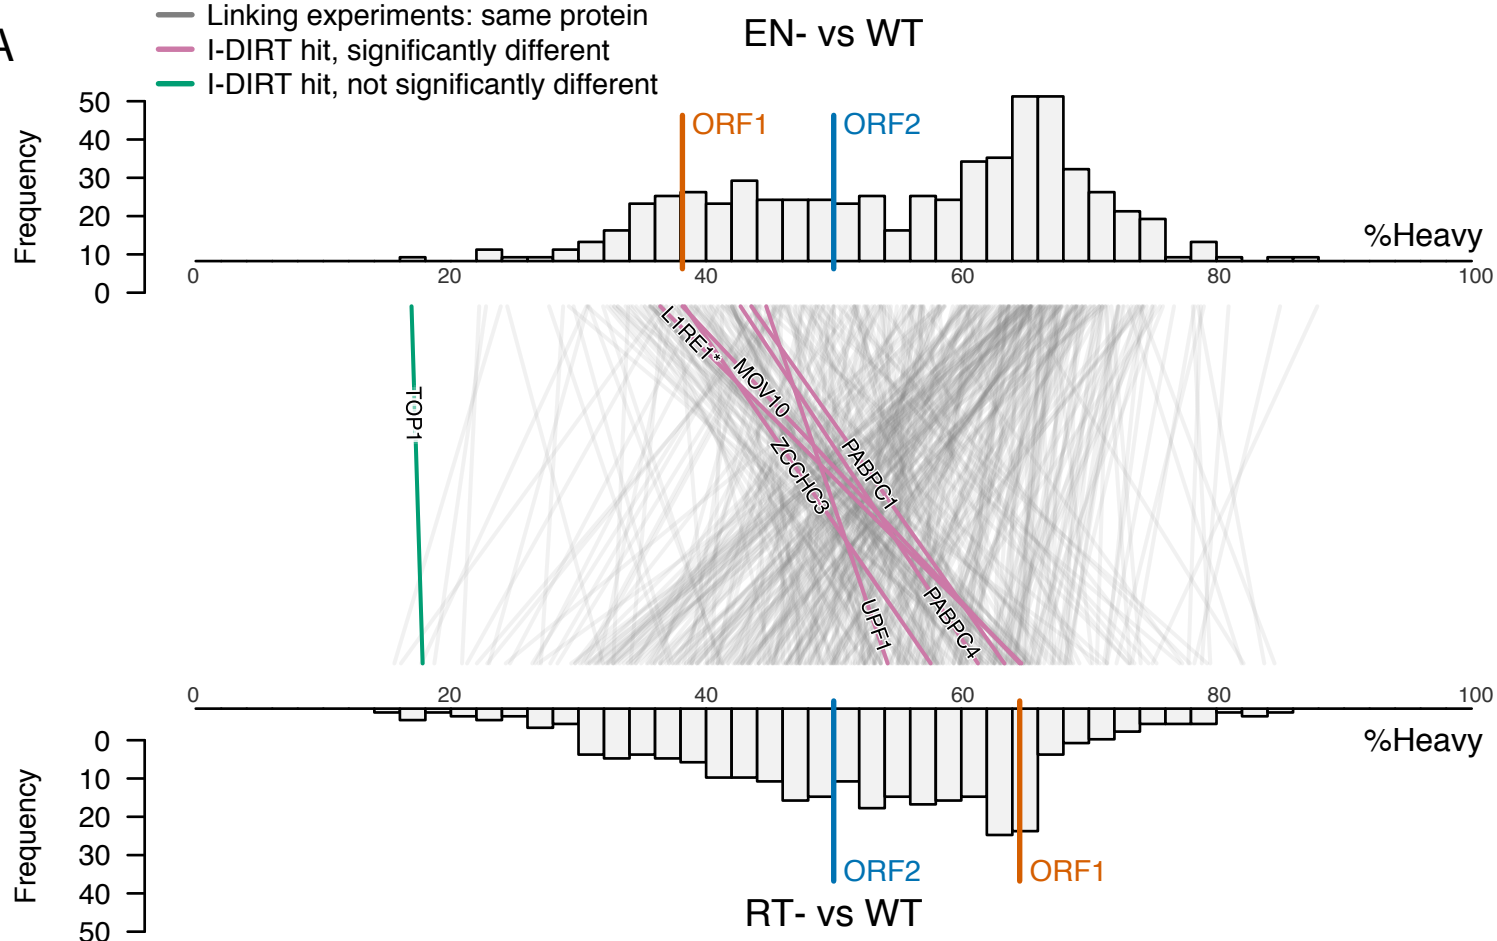**B**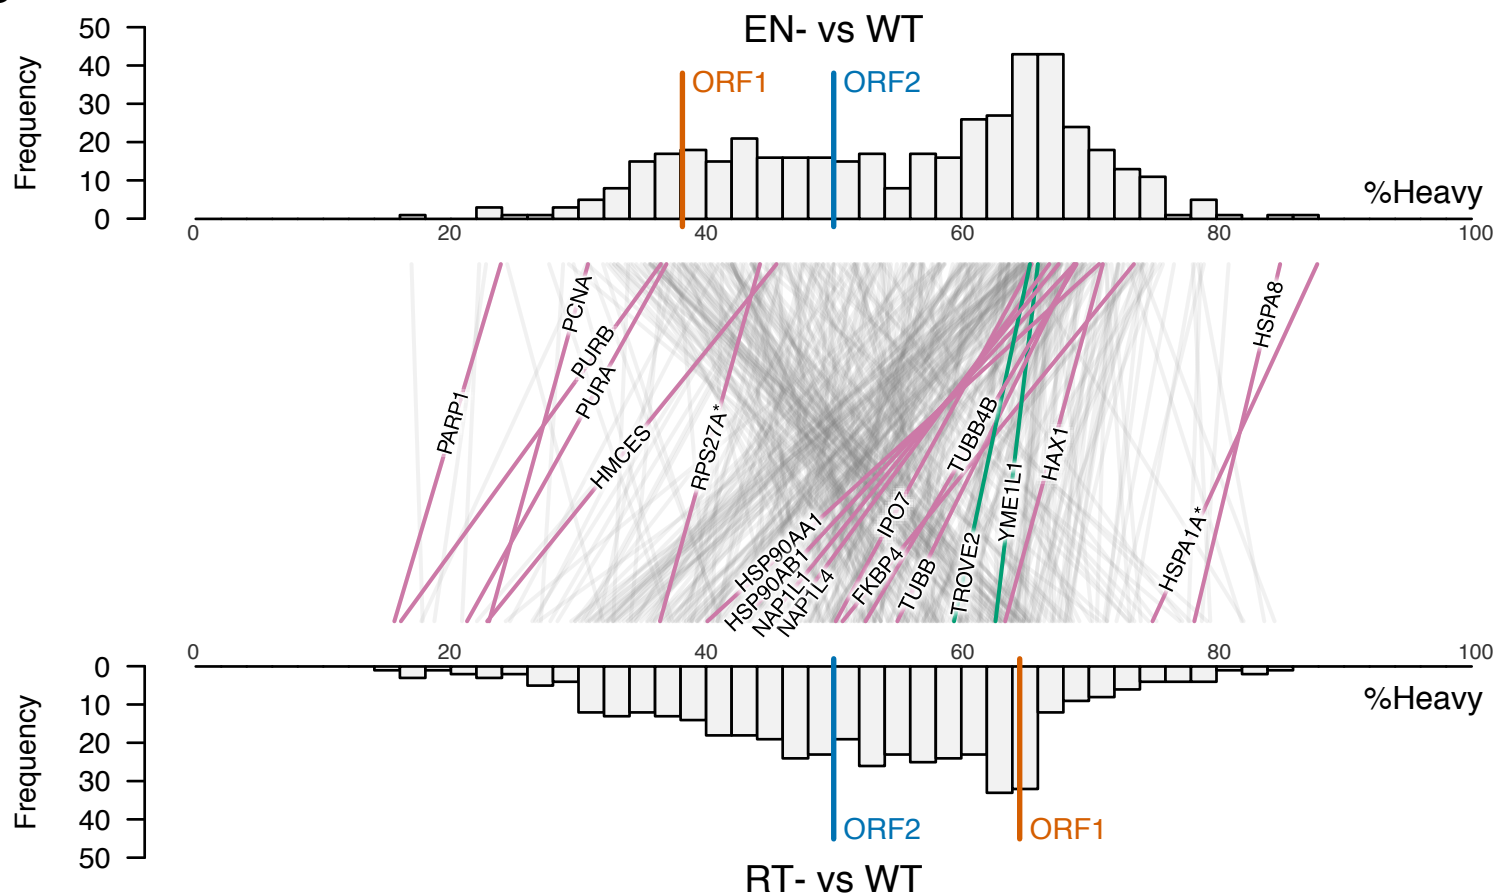

Supplement: supp [file elife-30094-supp-v1.zip]
