# Supplementary material for: Dissection of affinity captured LINE-1 macromolecular complexes
Source: eLife. 2018 Jan 8;7:e30094. doi: 10.7554/eLife.30094 (PMC5821459; doi:10.7554/eLife.30094)
Supplement: Supplementary file 1. [file elife-30094-supp1.xlsx]

## Sheet: RNAse
Genes	Uniprot	Protein	Color	P-value	Exp1_affinity	Exp2_affinity	Avg_affinity
L1RE (ORF1)	Q9UN81	LINE-1 retrotransposable element ORF1 protein	blue	1.78129e-29	0.6884	0.4713	0.5798
MOV10	Q9HCE1	Putative helicase MOV-10	blue	9.19752e-20	0.4672	0.5209	0.4941
ZCCHC3	Q9NUD5	Zinc finger CCHC domain-containing protein 3	blue	1.2922e-16	0.5093	0.4018	0.4555
UPF1	Q92900	Regulator of nonsense transcripts 1	blue	5.90078e-07	0.2435	0.3712	0.3074
PABPC4	Q13310	Polyadenylate-binding protein 4	blue		-0.0655	-0.0547	-0.0601
PABPC1	P11940	Polyadenylate-binding protein 1	blue		-0.0371	-0.0624	-0.0497
ORF2	O00370		blue		-0.1111	-0.03	-0.0705
RPL10A	P62906	60S ribosomal protein L10a	black	9.03091e-50	0.848	0.6257	0.7368
RPL12	P30050	60S ribosomal protein L12	black	5.88081e-48	0.8129	0.6429	0.7279
RBM8A	Q9Y5S9	RNA-binding protein 8A	black	6.38638e-28	0.6462	0.4959	0.571
RPLP0, RPLP0P6	P05388, Q8NHW5	60S acidic ribosomal protein P0, 60S acidic ribosomal protein P0-like	black	1.24586e-23	0.5958	0.4667	0.5312
EIF4A3	P38919	Eukaryotic initiation factor 4A-III	black	6.89487e-22	0.5317	0.5028	0.5172
MAGOH	P61326	Protein mago nashi homolog	black	2.30655e-20	0.5022	0.5004	0.5013
SRSF7	Q16629	Serine/arginine-rich splicing factor 7	black	8.46465e-05	0.2533	0.2786	0.2659
RPL30	P62888	60S ribosomal protein L30	black	0.00010996	0.3224	0.1865	0.2544
FKBP4	Q02790	Peptidyl-prolyl cis-trans isomerase FKBP4	pink		0.0455	-0.1498	-0.0521
HAX1	O00165	HCLS1-associated protein X-1	pink		-0.0952	-0.1327	-0.1139
PURB	Q96QR8	Transcriptional activator protein Pur-beta	pink		-0.1373	0.0233	-0.057
IPO7	O95373	Importin-7	pink		-0.0336	-0.1592	-0.0964
TUBB	P07437	Tubulin beta chain	pink		-0.0215	-0.1772	-0.0993
HSP90AA1	P07900	Heat shock protein HSP 90-alpha	pink		-0.0153	-0.1781	-0.0967
HSP90AB1	P08238	Heat shock protein HSP 90-beta	pink		-0.0136	-0.1643	-0.089
PARP1	P09874	Poly [ADP-ribose] polymerase 1	pink		-0.12	-0.0499	-0.0849
HSPA1A, HSPA1B	P0DMV8, P0DMV9	Heat shock 70 kDa protein 1A, Heat shock 70 kDa protein 1B	pink		-0.1171	-0.0234	-0.0702
HSPA8	P11142	Heat shock cognate 71 kDa protein	pink		-0.089	-0.0596	-0.0743
PCNA	P12004	Proliferating cell nuclear antigen	pink		-0.1446	-0.0699	-0.1073
NAP1L1	P55209	Nucleosome assembly protein 1-like 1	pink		-0.1894	-0.0025	-0.096
UBB, UBC, RPS27A, UBA52	P0CG47, P0CG48, P62979, P62987	Polyubiquitin-B [Cleaved into: Ubiquitin], Polyubiquitin-C [Cleaved into: Ubiquitin], Ubiquitin-40S ribosomal protein S27a, Ubiquitin-60S ribosomal protein L40	pink		-0.064	0.026	-0.019
TUBB4B	P68371	Tubulin beta-4B chain	pink		-0.0144	-0.1655	-0.09
PURA	Q00577	Transcriptional activator protein Pur-alpha	pink		-0.1541	0.0179	-0.0681
HNRNPU	Q00839	Heterogeneous nuclear ribonucleoprotein U	gray		-0.0196	0.0182	-0.0007
SLC25A11	Q02978	Mitochondrial 2-oxoglutarate/malate carrier protein	gray		-0.0034	-0.1191	-0.0612
SSBP1	Q04837	Single-stranded DNA-binding protein, mitochondrial	gray		-0.0821	-0.0994	-0.0907
FMR1	Q06787	Synaptic functional regulator FMR1	gray		-0.1164	-0.0567	-0.0866
PRDX1	Q06830	Peroxiredoxin-1	gray		-0.0942	-0.0737	-0.0839
DHX9	Q08211	ATP-dependent RNA helicase A	gray		0.1941	-0.0173	0.0884
SSRP1	Q08945	FACT complex subunit SSRP1	gray		-0.0679	-0.0312	-0.0496
RBBP4	Q09028	Histone-binding protein RBBP4	gray		0.0153	-0.2449	-0.1148
SRSF9	Q13242	Serine/arginine-rich splicing factor 9	gray		-0.0256	0.143	0.0587
TRA2A	Q13595	Transformer-2 protein homolog alpha	gray		0.1996	0.2642	0.2319
SAFB2	Q14151	Scaffold attachment factor B2	gray		-0.0283	0.1711	0.0714
RCN2	Q14257	Reticulocalbin-2	gray		-0.1693	0.0185	-0.0754
RBM39	Q14498	RNA-binding protein 39	gray		-0.1129	-0.0595	-0.0862
EFTUD2	Q15029	116 kDa U5 small nuclear ribonucleoprotein component	gray		0.1148	0.1177	0.1162
STK38	Q15208	Serine/threonine-protein kinase 38	gray		-0.2353	0.0416	-0.0968
RNPS1	Q15287	RNA-binding protein with serine-rich domain 1	gray		-0.1346	-0.0307	-0.0827
RCN1	Q15293	Reticulocalbin-1	gray		-0.154	-0.0751	-0.1146
PCBP2	Q15366	Poly(rC)-binding protein 2	gray		0.0076	0.0185	0.0131
ELAVL1	Q15717	ELAV-like protein 1	gray		0.0794	0.0441	0.0618
DDB1	Q16531	DNA damage-binding protein 1	gray		-0.0953	0.0006	-0.0473
PRPF8	Q6P2Q9	Pre-mRNA-processing-splicing factor 8	gray		0.1645	0.1884	0.1764
LARP1	Q6PKG0	La-related protein 1	gray		0.1713	-0.0165	0.0774
HIST3H3, H3F3C, HIST2H3A;	Q16695, Q6NXT2, Q71DI3	Histone H3.1t, Histone H3.3C, Histone H3.2	gray		0.0539	-0.0477	0.0031
DDX3X	O00571	ATP-dependent RNA helicase DDX3X	gray		0.0286	-0.0751	-0.0232
PPP6C	O00743	Serine/threonine-protein phosphatase 6 catalytic subunit	gray		-0.0989	-0.0616	-0.0802
UTP15	Q8TED0	U3 small nucleolar RNA-associated protein 15 homolog	gray		0.2419	0.0208	0.1313
IRS4	O14654	Insulin receptor substrate 4	gray		-0.1845	-0.012	-0.0983
PRMT5	O14744	Protein arginine N-methyltransferase 5	gray		-0.1713	-0.0321	-0.1017
DDX17	Q92841	Probable ATP-dependent RNA helicase DDX17	gray		0.027	0.0053	0.0162
PGAM5	Q96HS1	Serine/threonine-protein phosphatase PGAM5, mitochondrial	gray		-0.2432	0.0867	-0.0782
YTHDC1	Q96MU7	YTH domain-containing protein 1	gray		-0.1069	0.1533	0.0232
RBM14	Q96PK6	RNA-binding protein 14	gray		-0.09	-0.031	-0.0605
PHB2	Q99623	Prohibitin-2	gray		0.1321	-0.2429	-0.0554
ATXN2	Q99700	Ataxin-2	gray		-0.1519	0.0431	-0.0544
WDR77	Q9BQA1	Methylosome protein 50	gray		-0.0929	-0.1366	-0.1147
PNN	Q9H307	Pinin	gray		-0.0979	0.067	-0.0154
BCLAF1	Q9NYF8	Bcl-2-associated transcription factor 1	gray		-0.1412	0.0361	-0.0526
IGF2BP1	Q9NZI8	Insulin-like growth factor 2 mRNA-binding protein 1	gray		0.0481	0.1257	0.0869
HACD3	Q9P035	Very-long-chain	gray		-0.1544	-0.0141	-0.0842
PARP2	Q9UGN5	Poly [ADP-ribose] polymerase 2	gray		-0.2721	0.0853	-0.0934
SLC25A13	Q9UJS0	Calcium-binding mitochondrial carrier protein Aralar2	gray		-0.0958	-0.013	-0.0544
RALY	Q9UKM9	RNA-binding protein Raly	gray		-0.087	0.0117	-0.0376
ACIN1	Q9UKV3	Apoptotic chromatin condensation inducer in the nucleus	gray		0.0068	-0.0577	-0.0254
PRPF19	Q9UMS4	Pre-mRNA-processing factor 19	gray		0.1077	0.026	0.0668
PHGDH	O43175	D-3-phosphoglycerate dehydrogenase	gray		0.0732	-0.0653	0.004
WDR3	Q9UNX4	WD repeat-containing protein 3	gray		0.2922	-0.0119	0.1402
RUVBL1	Q9Y265	RuvB-like 1	gray		-0.0976	-0.0835	-0.0905
THRAP3	Q9Y2W1	Thyroid hormone receptor-associated protein 3	gray		-0.1003	-0.0105	-0.0554
YTHDF2	Q9Y5A9	YTH domain-containing family protein 2	gray		-0.1135	-0.0837	-0.0986
SUPT16H	Q9Y5B9	FACT complex subunit SPT16	gray		-0.1675	-0.0612	-0.1144
CALU	O43852	Calumenin	gray		-0.1967	-0.0256	-0.1112
HIST1H2BK, H2BFS, HIST1H2BD, HIST1H2BC, HIST2H2BF, HIST1H2BH, HIST1H2BA, HIST1H2BN, HIST1H2BM, HIST1H2BL	O60814, P57053, P58876, P62807, Q5QNW6, Q93079, Q96A08, Q99877, Q99879, Q99880	Histone H2B type 1-K, Histone H2B type F-S, Histone H2B type 1-D, Histone H2B type 1-C/E/F/G/I, Histone H2B type 2-F, Histone H2B type 1-H, Histone H2B type 1-A, Histone H2B type 1-N, Histone H2B type 1-M, Histone H2B type 1-L	gray		0.1616	-0.0791	0.0413
DNAJA2	O60884	DnaJ homolog subfamily A member 2	gray		-0.2013	-0.0103	-0.1058
H2AFY	O75367	Core histone macro-H2A.1	gray		-0.0355	0.0201	-0.0077
SRSF10	O75494	Serine/arginine-rich splicing factor 10	gray		0.0619	0.1982	0.13
GMNN	O75496	Geminin	gray		-0.1832	0.0225	-0.0804
SNRNP200	O75643	U5 small nuclear ribonucleoprotein 200 kDa helicase	gray		0.101	0.1428	0.1219
BAG2	O95816	BAG family molecular chaperone regulator 2	gray		-0.1103	-0.0796	-0.0949
AIFM1	O95831	Apoptosis-inducing factor 1, mitochondrial	gray		-0.1565	-0.0994	-0.1279
LDHA	P00338	L-lactate dehydrogenase A chain	gray		0.087	-0.1363	-0.0247
GAPDH	P04406	Glyceraldehyde-3-phosphate dehydrogenase	gray		0.0735	-0.0541	0.0097
RPN1	P04843	Dolichyl-diphosphooligosaccharide--protein glycosyltransferase subunit 1	gray		0.0062	-0.1287	-0.0613
ATP1A1	P05023	Sodium/potassium-transporting ATPase subunit alpha-1	gray		-0.1257	-0.1104	-0.1181
SLC25A5	P05141	ADP/ATP translocase 2	gray		-0.0775	-0.0999	-0.0887
ATP5B	P06576	ATP synthase subunit beta, mitochondrial	gray		0.1169	-0.2742	-0.0786
NPM1	P06748	Nucleophosmin	gray		-0.0323	0.0113	-0.0105
HNRNPC	P07910	Heterogeneous nuclear ribonucleoproteins C1/C2	gray		-0.1934	0.075	-0.0592
VIM	P08670	Vimentin	gray		0.0981	-0.1857	-0.0438
H2AFZ, H2AFV	P0C0S5, Q71UI9	Histone H2A.Z, Histone H2A.V	gray		-0.0107	-0.06	-0.0353
HIST1H2AG, HIST1H2AD, HIST1H2AH, HIST1H2AJ, H2AFJ	A0A0U1RRH7, P0C0S8, P20671, Q96KK5, Q99878, Q9BTM1	Histone H2A, Histone H2A type 1, Histone H2A type 1-D, Histone H2A type 1-H, Histone H2A type 1-J, Histone H2A.J	gray		0.0179	0.0606	0.0393
HSPD1	P10809	60 kDa heat shock protein, mitochondrial	gray		-0.0242	-0.1297	-0.077
HSPA5	P11021	78 kDa glucose-regulated protein	gray		-0.0781	-0.0555	-0.0668
XRCC6	P12956	X-ray repair cross-complementing protein 6	gray		-0.1803	0.006	-0.0871
XRCC5	P13010	X-ray repair cross-complementing protein 5	gray		-0.1745	0.0008	-0.0869
EEF2	P13639	Elongation factor 2	gray		0.0092	-0.1587	-0.0748
TCP1	P17987	T-complex protein 1 subunit alpha	gray		-0.2136	-0.1705	-0.192
RPL7	P18124	60S ribosomal protein L7	gray		-0.133	-0.1741	-0.1535
RPL17-C18orf32, RPL17	A0A0A6YYL6, P18621	Protein RPL17-C18orf32, 60S ribosomal protein L17	gray		-0.0372	-0.0979	-0.0675
TRIM21	P19474	E3 ubiquitin-protein ligase TRIM21	gray		-0.0866	-0.0459	-0.0662
VDAC1	P21796	Voltage-dependent anion-selective channel protein 1	gray		0.051	0.0303	0.0406
FBL	P22087	rRNA 2'-O-methyltransferase fibrillarin	gray		0.2054	-0.0242	0.0906
HNRNPA2B1	P22626	Heterogeneous nuclear ribonucleoproteins A2/B1	gray		0.0616	-0.1025	-0.0205
RPS3	P23396	40S ribosomal protein S3	gray		0.0181	-0.2306	-0.1062
RPL13	P26373	60S ribosomal protein L13	gray		0.0378	-0.1065	-0.0343
PTBP1	P26599	Polypyrimidine tract-binding protein 1	gray		-0.0016	0.0139	0.0061
RPA1	P27694	Replication protein A 70 kDa DNA-binding subunit	gray		-0.1198	0.0438	-0.038
PPP2R1A	P30153	Serine/threonine-protein phosphatase 2A 65 kDa regulatory subunit A alpha isoform	gray		-0.0475	0.0586	0.0056
DNAJA1	P31689	DnaJ homolog subfamily A member 1	gray		-0.1788	0.0336	-0.0726
HNRNPH1	P31943	Heterogeneous nuclear ribonucleoprotein H	gray		0.0974	0.0688	0.0831
RPL4	P36578	60S ribosomal protein L4	gray		-0.107	-0.175	-0.141
HSPA9	P38646	Stress-70 protein, mitochondrial	gray		0.0241	-0.12	-0.048
RPL3	P39023	60S ribosomal protein L3	gray		-0.0274	-0.1749	-0.1011
RPL13A	P40429	60S ribosomal protein L13a	gray		-0.0854	-0.2196	-0.1525
IARS	P41252	Isoleucine--tRNA ligase, cytoplasmic	gray		-0.0187	-0.104	-0.0614
MATR3	P43243	Matrin-3	gray		0.0438	0.0357	0.0398
VDAC2	P45880	Voltage-dependent anion-selective channel protein 2	gray		0.0063	-0.1455	-0.0696
RPL27A	P46776	60S ribosomal protein L27a	gray		-0.0636	-0.0019	-0.0327
RPL5	P46777	60S ribosomal protein L5	gray	0.000208914900845073	-0.1123	-0.3444	-0.2283
EMD	P50402	Emerin	gray		-0.1007	-0.0839	-0.0923
HNRNPM	P52272	Heterogeneous nuclear ribonucleoprotein M	gray		0.0756	-0.0102	0.0327
HNRNPF	P52597	Heterogeneous nuclear ribonucleoprotein F	gray		0.07	-0.0175	0.0263
HNRNPH2	P55795	Heterogeneous nuclear ribonucleoprotein H2	gray		0.1025	0.0412	0.0719
EIF4A1	P60842	Eukaryotic initiation factor 4A-I	gray		0.0627	-0.1734	-0.0554
RPL27	P61353	60S ribosomal protein L27	gray		0.2342	0.038	0.1361
HNRNPK	P61978	Heterogeneous nuclear ribonucleoprotein K	gray		-0.0122	0.0258	0.0068
RPS8	P62241	40S ribosomal protein S8	gray		-0.1478	-0.0662	-0.107
RPS11	P62280	40S ribosomal protein S11	gray		-0.113	-0.0186	-0.0658
HIST1H4A	P62805	Histone H4	gray		0.0477	-0.0618	-0.0071
RPL8	P62917	60S ribosomal protein L8	gray		0.1829	-0.13	0.0264
TRA2B	P62995	Transformer-2 protein homolog beta	gray		-0.1839	-0.045	-0.1144
RPL38	P63173	60S ribosomal protein L38	gray		0.06	-0.0837	-0.0119
RACK1	P63244	Receptor of activated protein C kinase 1	gray		-0.0573	-0.2085	-0.1329
YBX1	P67809	Nuclease-sensitive element-binding protein 1	gray		0.105	0.294	0.1995
EEF1A1, EEF1A1P5	P68104, Q5VTE0	Elongation factor 1-alpha 1, Putative elongation factor 1-alpha-like 3	gray		-0.054	-0.0848	-0.0694
TUBA1B	P68363	Tubulin alpha-1B chain	gray		-0.0345	-0.1389	-0.0867
CCT2	P78371	T-complex protein 1 subunit beta	gray		-0.0535	-0.1785	-0.116
PRKDC	P78527	DNA-dependent protein kinase catalytic subunit	gray		-0.0657	-0.1373	-0.1015
MRPS22	P82650	28S ribosomal protein S22, mitochondrial	gray		-0.0409	-0.1481	-0.0945
MRPS34	P82930	28S ribosomal protein S34, mitochondrial	gray		0.0445	-0.1203	-0.0379
RPL24	P83731	60S ribosomal protein L24	gray		0.0522	-0.1708	-0.0593
ERH	P84090	Enhancer of rudimentary homolog	gray		-0.1235	-0.0164	-0.07
SRSF3	P84103	Serine/arginine-rich splicing factor 3	gray		0.0348	0.1753	0.1051
SLC25A3	Q00325	Phosphate carrier protein, mitochondrial	gray		-0.0274	-0.0907	-0.059

## Sheet: Tandem
Genes	Uniprot	Protein	Color	Exp1_affinity	Exp2_affinity	Avg_affinity
L1RE (ORF1)	Q9UN81	LINE-1 retrotransposable element ORF1 protein	blue	1	1	1
MOV10	Q9HCE1	Putative helicase MOV-10	blue	0.8189	0.8595	0.8392
PABPC1	P11940	Polyadenylate-binding protein 1	blue	0.7533	0.7967	0.775
PABPC4	Q13310	Polyadenylate-binding protein 4	blue	0.7245	0.798	0.7613
UPF1	Q92900	Regulator of nonsense transcripts 1	blue	0.4579	0.6459	0.5519
ZCCHC3	Q9NUD5	Zinc finger CCHC domain-containing protein 3	blue	0.2744	0.4754	0.3749
ORF2	O00370		blue	0.1871	0.332	0.2596
HMCES	Q96FZ2	Embryonic stem cell-specific 5-hydroxymethylcytosine-binding protein	pink	0.5765	0.5312	0.5539
PARP1	P09874	Poly [ADP-ribose] polymerase 1	pink	0.3615	0.3528	0.3572
FKBP4	Q02790	Peptidyl-prolyl cis-trans isomerase FKBP4	pink	0.2582	0.2877	0.273
TUBB4B	P68371	Tubulin beta-4B chain	pink	0.2525	0.2363	0.2444
TUBB	P07437	Tubulin beta chain	pink	0.2343	0.23	0.2322
HSP90AB1	P08238	Heat shock protein HSP 90-beta	pink	0.2671	0.1822	0.2246
UBB, UBC, RPS27A, UBA52	P0CG47, P0CG48, P62979, P62987	Polyubiquitin-B [Cleaved into: Ubiquitin], Polyubiquitin-C [Cleaved into: Ubiquitin], Ubiquitin-40S ribosomal protein S27a, Ubiquitin-60S ribosomal protein L40	pink	0.1684	0.2739	0.2212
HSP90AA1	P07900	Heat shock protein HSP 90-alpha	pink	0.2787	0.1562	0.2175
NAP1L1	P55209	Nucleosome assembly protein 1-like 1	pink	0.1877	0.2468	0.2172
IPO7	O95373	Importin-7	pink	0.1758	0.1886	0.1822
TOP1	P11387	DNA topoisomerase 1	pink	0.15	0.206	0.178
HAX1	O00165	HCLS1-associated protein X-1	pink	0.1108	0.1706	0.1407
PCNA	P12004	Proliferating cell nuclear antigen	pink	0.0708	0.19	0.1304
PURB	Q96QR8	Transcriptional activator protein Pur-beta	pink	0.0557	0.2036	0.1296
PURA	Q00577	Transcriptional activator protein Pur-alpha	pink	0.0549	0.1907	0.1228
HSPA8	P11142	Heat shock cognate 71 kDa protein	pink	0.093	0.1443	0.1187
HSPA1A, HSPA1B	P0DMV8, P0DMV9	Heat shock 70 kDa protein 1A, Heat shock 70 kDa protein 1B	pink	0.0872	0.1264	0.1068
VIM	P08670	Vimentin	gray	0.8403	0.6615	0.7509
EIF4A3	P38919	Eukaryotic initiation factor 4A-III	gray	0.5551	0.6708	0.6129
MATR3	P43243	Matrin-3	gray	0.6539	0.5219	0.5879
LARP1	Q6PKG0	La-related protein 1	gray	0.5433	0.6007	0.572
HNRNPH1	P31943	Heterogeneous nuclear ribonucleoprotein H	gray	0.5532	0.5335	0.5433
TRA2A	Q13595	Transformer-2 protein homolog alpha	gray	0.4741	0.5277	0.5009
HNRNPM	P52272	Heterogeneous nuclear ribonucleoprotein M	gray	0.5128	0.4596	0.4862
HNRNPU	Q00839	Heterogeneous nuclear ribonucleoprotein U	gray	0.5901	0.377	0.4835
ENO1	P06733	Alpha-enolase	gray	0.6632	0.2818	0.4725
CANX	P27824	Calnexin	gray	0.7191	0.2254	0.4722
EEF1A1, EEF1A1P5	P68104, Q5VTE0	Elongation factor 1-alpha 1, Putative elongation factor 1-alpha-like 3	gray	0.5825	0.3547	0.4686
DDX17	Q92841	Probable ATP-dependent RNA helicase DDX17	gray	0.5995	0.336	0.4678
HNRNPF	P52597	Heterogeneous nuclear ribonucleoprotein F	gray	0.416	0.5178	0.4669
HNRNPK	P61978	Heterogeneous nuclear ribonucleoprotein K	gray	0.6067	0.3059	0.4563
RPL30	P62888	60S ribosomal protein L30	gray	0.4278	0.4398	0.4338
RPL7	P18124	60S ribosomal protein L7	gray	0.416	0.4443	0.4301
GAPDH	P04406	Glyceraldehyde-3-phosphate dehydrogenase	gray	0.465	0.375	0.42
YBX1	P67809	Nuclease-sensitive element-binding protein 1	gray	0.3102	0.5111	0.4106
SRSF7	Q16629	Serine/arginine-rich splicing factor 7	gray	0.3979	0.3927	0.3953
RPLP0, RPLP0P6	P05388, Q8NHW5	60S acidic ribosomal protein P0, 60S acidic ribosomal protein P0-like	gray	0.2774	0.479	0.3782
EEF2	P13639	Elongation factor 2	gray	0.4819	0.27	0.376
HIST3H3, H3F3C, HIST2H3A;	Q16695, Q6NXT2, Q71DI3	Histone H3.1t, Histone H3.3C, Histone H3.2	gray	0.564	0.1844	0.3742
RPL10A	P62906	60S ribosomal protein L10a	gray	0.3306	0.4148	0.3727
TRA2B	P62995	Transformer-2 protein homolog beta	gray	0.3215	0.4233	0.3724
RPL12	P30050	60S ribosomal protein L12	gray	0.2983	0.4414	0.3698
YBX3	P16989	Y-box-binding protein 3	gray	0.2245	0.4914	0.3579
ACTB	P60709	Actin, cytoplasmic 1	gray	0.4921	0.2054	0.3487
LMNB1	P20700	Lamin-B1	gray	0.4308	0.2426	0.3367
HSPA9	P38646	Stress-70 protein, mitochondrial	gray	0.4797	0.1889	0.3343
HSPD1	P10809	60 kDa heat shock protein, mitochondrial	gray	0.4759	0.1835	0.3297
RPS2	P15880	40S ribosomal protein S2	gray	0.3438	0.3133	0.3285
RPN1	P04843	Dolichyl-diphosphooligosaccharide--protein glycosyltransferase subunit 1	gray	0.3864	0.2414	0.3139
RPL3	P39023	60S ribosomal protein L3	gray	0.3221	0.294	0.308
PRKDC	P78527	DNA-dependent protein kinase catalytic subunit	gray	0.308	0.2691	0.2885
HSPA5	P11021	78 kDa glucose-regulated protein	gray	0.3373	0.2372	0.2872
HIST1H2AG, HIST1H2AD, HIST1H2AH, HIST1H2AJ, H2AFJ	A0A0U1RRH7, P0C0S8, P20671, Q96KK5, Q99878, Q9BTM1	Histone H2A, Histone H2A type 1, Histone H2A type 1-D, Histone H2A type 1-H, Histone H2A type 1-J, Histone H2A.J	gray	0.3274	0.2426	0.285
SLC25A5	P05141	ADP/ATP translocase 2	gray	0.2843	0.2792	0.2817
IRS4	O14654	Insulin receptor substrate 4	gray	0.2261	0.3162	0.2712
RALY	Q9UKM9	RNA-binding protein Raly	gray	0.196	0.3384	0.2672
HIST1H2BK, H2BFS, HIST1H2BD, HIST1H2BC, HIST2H2BF, HIST1H2BH, HIST1H2BA, HIST1H2BN, HIST1H2BM, HIST1H2BL	O60814, P57053, P58876, P62807, Q5QNW6, Q93079, Q96A08, Q99877, Q99879, Q99880	Histone H2B type 1-K, Histone H2B type F-S, Histone H2B type 1-D, Histone H2B type 1-C/E/F/G/I, Histone H2B type 2-F, Histone H2B type 1-H, Histone H2B type 1-A, Histone H2B type 1-N, Histone H2B type 1-M, Histone H2B type 1-L	gray	0.3473	0.181	0.2641
RPL23	P62829	60S ribosomal protein L23	gray	0.2392	0.288	0.2636
RCN2	Q14257	Reticulocalbin-2	gray	0.166	0.3551	0.2606
RPL4	P36578	60S ribosomal protein L4	gray	0.2733	0.2476	0.2605
PPP6R3	Q5H9R7	Serine/threonine-protein phosphatase 6 regulatory subunit 3	gray	0.2133	0.3016	0.2574
KPNB1	Q14974	Importin subunit beta-1	gray	0.3029	0.2106	0.2567
PPP2R1A	P30153	Serine/threonine-protein phosphatase 2A 65 kDa regulatory subunit A alpha isoform	gray	0.2534	0.2593	0.2564
PCBP2	Q15366	Poly(rC)-binding protein 2	gray	0.2716	0.2393	0.2554
TUBA1B	P68363	Tubulin alpha-1B chain	gray	0.2409	0.2483	0.2446
RBM39	Q14498	RNA-binding protein 39	gray	0.2649	0.2057	0.2353
HIST1H4A	P62805	Histone H4	gray	0.293	0.1764	0.2347
RPL11	P62913	60S ribosomal protein L11	gray	0.2107	0.2562	0.2334
EMD	P50402	Emerin	gray	0.1784	0.2842	0.2313
CALU	O43852	Calumenin	gray	0.1997	0.2615	0.2306
NCBP1	Q09161	Nuclear cap-binding protein subunit 1	gray	0.2039	0.2362	0.22
IGF2BP1	Q9NZI8	Insulin-like growth factor 2 mRNA-binding protein 1	gray	0.1742	0.2555	0.2149
IGF2BP3	O00425	Insulin-like growth factor 2 mRNA-binding protein 3	gray	0.1406	0.2819	0.2112
AIFM1	O95831	Apoptosis-inducing factor 1, mitochondrial	gray	0.2223	0.1911	0.2067
XRCC6	P12956	X-ray repair cross-complementing protein 6	gray	0.1749	0.2218	0.1984
PARP2	Q9UGN5	Poly [ADP-ribose] polymerase 2	gray	0.1131	0.2815	0.1973
XRCC5	P13010	X-ray repair cross-complementing protein 5	gray	0.1413	0.2402	0.1908
THRAP3	Q9Y2W1	Thyroid hormone receptor-associated protein 3	gray	0.158	0.2097	0.1839
RPL6	Q02878	60S ribosomal protein L6	gray	0.1998	0.164	0.1819
SUPT16H	Q9Y5B9	FACT complex subunit SPT16	gray	0.2404	0.115	0.1777
HNRNPC	P07910	Heterogeneous nuclear ribonucleoproteins C1/C2	gray	0.0896	0.2571	0.1733
DNAJA2	O60884	DnaJ homolog subfamily A member 2	gray	0.0873	0.2451	0.1662
DNAJA1	P31689	DnaJ homolog subfamily A member 1	gray	0.0989	0.2239	0.1614
RPL5	P46777	60S ribosomal protein L5	gray	0.1909	0.1199	0.1554
RPL15	P61313	60S ribosomal protein L15	gray	0.1641	0.1442	0.1542
RPL7A	P62424	60S ribosomal protein L7a	gray	0.1678	0.1313	0.1495
DDB1	Q16531	DNA damage-binding protein 1	gray	0.1166	0.1791	0.1478
PRMT5	O14744	Protein arginine N-methyltransferase 5	gray	0.1377	0.1579	0.1478
RPL18	Q07020	60S ribosomal protein L18	gray	0.1331	0.1191	0.1261
SSBP1	Q04837	Single-stranded DNA-binding protein, mitochondrial	gray	0.0773	0.1685	0.1229
GMNN	O75496	Geminin	gray	0.0375	0.2008	0.1192
DDX39B	Q13838	Spliceosome RNA helicase DDX39B	gray	0.1399	0.0975	0.1187
STK38	Q15208	Serine/threonine-protein kinase 38	gray	0.0629	0.1743	0.1186
RPA1	P27694	Replication protein A 70 kDa DNA-binding subunit	gray	0.0109	0.121	0.0659

## Sheet: Mutants
Genes	Uniprot	Protein	Color	RT_Exp1_affinity	RT_Exp2_affinity	RT_Exp3_affinity	EN_Exp1_affinity	EN_Exp2_affinity	EN_Exp3_affinity	RT_Avg_affinity	ENDO_Avg_affinity	Adjusted_P-value	RT_vs_WT_Adjusted_P-value	EN_vs_WT_Adjusted_P-value
TOP1	P11387	DNA topoisomerase 1	green	0.818277	0.782425	0.86575	0.785277	0.80681	0.900523	0.17785	0.16913	0.882525	0.010326	0.018598
TROVE2	P10155	60 kDa SS-A/Ro ribonucleoprotein	green	0.470529	0.332931	0.413579	0.243482	0.448859	NA	0.59432	0.653829	0.719807	0.160454	0.37472
YME1L1	Q96TA2	ATP-dependent zinc metalloprotease YME1L1	green	NA	0.352056	0.394336	0.395186	0.295748	0.328973	0.626804	0.660031	0.478041	0.124292	0.036615
PCNA	P12004	Proliferating cell nuclear antigen	pink	0.749247	0.751238	0.809738	0.693796	0.676066	0.707793	0.229926	0.307448	0.04951	0.010326	0.005649
NAP1L4	Q99733	Nucleosome assembly protein 1-like 4	pink	0.46897	0.529967	0.614066	0.318724	0.338053	0.336288	0.462332	0.668978	0.0450704	0.503761	0.004853
PARP1	P09874	Poly [ADP-ribose] polymerase 1	pink	0.833803	0.815658	0.883516	0.753766	0.748856	0.779944	0.155675	0.239145	0.0450704	0.009932	0.004853
HMCES	Q96FZ2	Embryonic stem cell-specific 5-hydroxymethylcytosine-binding protein	pink	0.763613	0.79112	0.759847	NA	0.522198	0.567441	0.228473	0.455181	0.0440446	0.00598	0.309473
UBB, UBC, RPS27A, UBA52	P0CG47, P0CG48, P62979, P62987	Polyubiquitin-B [Cleaved into: Ubiquitin], Polyubiquitin-C [Cleaved into: Ubiquitin], Ubiquitin-40S ribosomal protein S27a, Ubiquitin-60S ribosomal protein L40	pink	0.615142	0.633892	0.659363	0.523243	0.570839	0.579267	0.363868	0.442217	0.0367447	0.015149	0.08697
FKBP4	Q02790	Peptidyl-prolyl cis-trans isomerase FKBP4	pink	NA	0.479387	0.506677	0.256221	0.273526	0.264379	0.506968	0.735291	0.0307021	0.727407	0.0039
ZCCHC3	Q9NUD5	Zinc finger CCHC domain-containing protein 3	pink	0.434597	0.381044	0.456297	0.620308	0.607434	0.622995	0.576021	0.383087	0.016668	0.094974	0.004853
HSPA8	P11142	Heat shock cognate 71 kDa protein	pink	0.219952	0.204886	0.227289	0.149152	0.150538	0.150666	0.782624	0.849882	0.0155029	0.00598	0
UPF1	Q92900	Regulator of nonsense transcripts 1	pink	0.463401	0.453459	0.456263	0.546666	0.539959	0.571992	0.542292	0.447128	0.0115462	0.010326	0.036615
TUBB	P07437	Tubulin beta chain	pink	0.460043	0.444755	0.445479	0.284832	0.322572	0.327577	0.549908	0.68834	0.00922212	0.015941	0.01018
TUBB4B	P68371	Tubulin beta-4B chain	pink	0.480232	0.472685	0.47205	0.283592	0.32452	0.320858	0.525011	0.690343	0.00922212	0.016609	0.010162
IPO7	O95373	Importin-7	pink	0.51173	0.481275	0.502153	0.317815	0.341637	0.375167	0.501614	0.655127	0.00800803	0.87408	0.018598
MOV10	Q9HCE1	Putative helicase MOV-10	pink	0.345345	0.351901	0.361296	0.600585	0.642035	0.665256	0.647153	0.364041	0.00716221	0.00598	0.023289
HSPA1A, HSPA1B	P0DMV8, P0DMV9	Heat shock 70 kDa protein 1A, Heat shock 70 kDa protein 1B	pink	0.252249	0.23685	0.261279	0.119141	0.120198	0.123694	0.749874	0.878989	0.00612466	0.00598	0.00013
HAX1	O00165	HCLS1-associated protein X-1	pink	0.362621	0.358793	0.375317	0.28026	0.283116	0.303869	0.634423	0.710918	0.00607936	0.00598	0.004853
PURB	Q96QR8	Transcriptional activator protein Pur-beta	pink	0.815125	0.821286	0.881087	0.659202	0.641584	0.605649	0.160834	0.364522	0.00607936	0.009932	0.019153
PURA	Q00577	Transcriptional activator protein Pur-alpha	pink	0.764012	0.782136	0.815892	0.629346	0.606705	0.657151	0.212653	0.368933	0.00607936	0.009068	0.018598
PABPC4	Q13310	Polyadenylate-binding protein 4	pink	0.388938	0.380193	0.391738	0.55981	0.569026	0.590209	0.613044	0.426985	0.00328442	0.00598	0.020321
HSP90AB1	P08238	Heat shock protein HSP 90-beta	pink	0.546049	0.574974	0.596488	0.296469	0.318697	0.3186	0.427497	0.688745	0.00311215	0.04979	0.004853
HSP90AA1	P07900	Heat shock protein HSP 90-alpha	pink	0.57481	0.596975	0.625097	0.275632	0.302067	0.298425	0.401039	0.707959	0.00170125	0.030247	0.004853
PABPC1	P11940	Polyadenylate-binding protein 1	pink	0.371195	0.354576	0.372992	0.554587	0.557878	0.581149	0.633746	0.435462	0.00114566	0.007131	0.021281
L1RE (ORF1)	Q9UN81	LINE-1 retrotransposable element ORF1 protein	pink	0.357821	0.335108	0.369788	0.598627	0.614172	0.642857	0.645761	0.381448	0.00114566	0.010326	0.018598
NAP1L1	P55209	Nucleosome assembly protein 1-like 1	pink	0.542689	0.545238	0.569164	0.312792	0.317556	0.34073	0.447636	0.676307	0.00114566	0.034156	0.005649
HNRNPU	Q00839	Heterogeneous nuclear ribonucleoprotein U	grey	0.44937	0.440078	0.457683	0.430055	0.450868	0.453797	NA	NA	NA	NA	NA
XPC	Q01831	DNA repair protein complementing XP-C cells	grey	0.694088	0.573757	0.572613	0.573645	0.58013	0.558454	NA	NA	NA	NA	NA
DSG1	Q02413	Desmoglein-1	grey	0.06089	NA	0.471785	0.189494	0.244754	NA	NA	NA	NA	NA	NA
RPL18A	Q02543	60S ribosomal protein L18a	grey	0.355432	0.365432	0.384764	0.620429	0.62332	0.650309	NA	NA	NA	NA	NA
RPL6	Q02878	60S ribosomal protein L6	grey	0.358785	0.360322	0.404205	0.614583	0.636176	0.662466	NA	NA	NA	NA	NA
TOP2B	Q02880	DNA topoisomerase 2-beta	grey	0.405853	0.486303	0.410169	0.324334	0.367615	0.352698	NA	NA	NA	NA	NA
SLC25A11	Q02978	Mitochondrial 2-oxoglutarate/malate carrier protein	grey	0.286293	0.324759	0.337886	0.226104	0.276991	0.314484	NA	NA	NA	NA	NA
CEBPZ	Q03701	CCAAT/enhancer-binding protein zeta	grey	0.338404	0.360732	0.559095	0.51057	0.50522	0.676557	NA	NA	NA	NA	NA
EIF4G1	Q04637	Eukaryotic translation initiation factor 4 gamma 1	grey	NA	0.550392	0.730479	0.482644	0.495797	0.559624	NA	NA	NA	NA	NA
SSBP1	Q04837	Single-stranded DNA-binding protein, mitochondrial	grey	0.702891	0.66699	0.738495	0.451234	0.478347	0.522957	NA	NA	NA	NA	NA
PRDX1	Q06830	Peroxiredoxin-1	grey	0.579728	0.621163	0.616458	0.350331	0.407974	0.430168	NA	NA	NA	NA	NA
RPL18	Q07020	60S ribosomal protein L18	grey	0.356117	0.346125	0.396412	0.597682	0.621954	0.639482	NA	NA	NA	NA	NA
C1QBP	Q07021	Complement component 1 Q subcomponent-binding protein, mitochondrial	grey	0.316065	0.356428	0.40718	0.307829	0.313145	0.291814	NA	NA	NA	NA	NA
KHDRBS1	Q07666	KH domain-containing, RNA-binding, signal transduction-associated protein 1	grey	NA	0.530753	0.562738	NA	0.454136	0.475022	NA	NA	NA	NA	NA
DHX9	Q08211	ATP-dependent RNA helicase A	grey	0.57385	0.575337	0.58718	0.458918	0.491996	0.488863	NA	NA	NA	NA	NA
SSRP1	Q08945	FACT complex subunit SSRP1	grey	0.579223	0.54836	0.586511	0.529031	0.509415	0.532759	NA	NA	NA	NA	NA
RBBP4	Q09028	Histone-binding protein RBBP4	grey	0.584217	0.586503	0.650098	0.376953	0.360889	0.386177	NA	NA	NA	NA	NA
NCBP1	Q09161	Nuclear cap-binding protein subunit 1	grey	0.288584	0.233005	0.286074	0.46844	0.51	0.537203	NA	NA	NA	NA	NA
NUP160	Q12769	Nuclear pore complex protein Nup160	grey	0.427019	0.471467	0.414734	0.402201	0.34565	0.41443	NA	NA	NA	NA	NA
TBL3	Q12788	Transducin beta-like protein 3	grey	0.485706	0.49255	0.511972	0.630936	0.57004	0.74268	NA	NA	NA	NA	NA
TRAP1	Q12931	Heat shock protein 75 kDa, mitochondrial	grey	NA	0.470972	0.389949	0.223445	0.266963	0.242219	NA	NA	NA	NA	NA
TARDBP	Q13148	TAR DNA-binding protein 43	grey	0.682383	0.612354	0.723293	0.655135	0.617055	0.710706	NA	NA	NA	NA	NA
PSMD2	Q13200	26S proteasome non-ATPase regulatory subunit 2	grey	0.576133	0.516178	0.583538	0.348712	0.347616	0.365659	NA	NA	NA	NA	NA
G3BP1	Q13283	Ras GTPase-activating protein-binding protein 1	grey	0.622952	0.612411	NA	0.527831	0.55696	0.532738	NA	NA	NA	NA	NA
DYNC1I2	Q13409	Cytoplasmic dynein 1 intermediate chain 2	grey	NA	0.406215	0.295793	0.338907	0.389178	0.310449	NA	NA	NA	NA	NA
TRA2A	Q13595	Transformer-2 protein homolog alpha	grey	0.291139	0.262672	0.250322	0.529648	0.571889	0.540807	NA	NA	NA	NA	NA
KRR1	Q13601	KRR1 small subunit processome component homolog	grey	0.38632	0.367058	0.395357	0.609969	0.654449	0.680418	NA	NA	NA	NA	NA
DDX39B	Q13838	Spliceosome RNA helicase DDX39B	grey	0.434953	0.394327	0.437856	0.610302	0.627834	0.635364	NA	NA	NA	NA	NA
HNRNPD	Q14103	Heterogeneous nuclear ribonucleoprotein D0	grey	0.522818	0.528301	0.528545	0.595998	0.592559	0.544491	NA	NA	NA	NA	NA
BOP1	Q14137	Ribosome biogenesis protein BOP1	grey	0.393102	0.381178	0.480693	0.584772	0.671432	0.676988	NA	NA	NA	NA	NA
EIF3A	Q14152	Eukaryotic translation initiation factor 3 subunit A	grey	0.559586	0.529946	0.463432	0.373031	0.39083	0.418182	NA	NA	NA	NA	NA
UBAP2L	Q14157	Ubiquitin-associated protein 2-like	grey	0.585832	0.426688	0.485911	0.51015	0.476773	0.434988	NA	NA	NA	NA	NA
DYNC1H1	Q14204	Cytoplasmic dynein 1 heavy chain 1	grey	0.373469	0.375724	0.391393	0.27858	0.315648	0.304073	NA	NA	NA	NA	NA
RCN2	Q14257	Reticulocalbin-2	grey	0.203583	0.201663	0.229452	0.179124	0.193872	0.198602	NA	NA	NA	NA	NA
RBM39	Q14498	RNA-binding protein 39	grey	0.407509	0.401657	0.409053	0.340712	0.372107	0.375846	NA	NA	NA	NA	NA
SMC1A	Q14683	Structural maintenance of chromosomes protein 1A	grey	0.636078	0.440428	0.447426	0.386393	0.404394	0.402827	NA	NA	NA	NA	NA
BMS1	Q14692	Ribosome biogenesis protein BMS1 homolog	grey	0.439534	0.425976	0.434511	0.67487	0.674452	0.675283	NA	NA	NA	NA	NA
GANAB	Q14697	Neutral alpha-glucosidase AB	grey	0.599388	0.640475	0.607531	0.32428	0.360949	0.358962	NA	NA	NA	NA	NA
CHD4	Q14839	Chromodomain-helicase-DNA-binding protein 4	grey	0.337637	0.421771	0.444649	0.343383	0.383849	0.362389	NA	NA	NA	NA	NA
KPNB1	Q14974	Importin subunit beta-1	grey	0.405104	0.383916	0.414722	0.293672	0.326256	0.344066	NA	NA	NA	NA	NA
NCAPH	Q15003	Condensin complex subunit 2	grey	0.311328	0.427347	0.467331	0.228865	0.32624	0.359819	NA	NA	NA	NA	NA
SART3	Q15020	Squamous cell carcinoma antigen recognized by T-cells 3	grey	0.585675	0.511551	0.472237	0.564153	0.565704	0.557297	NA	NA	NA	NA	NA
EFTUD2	Q15029	116 kDa U5 small nuclear ribonucleoprotein component	grey	0.455422	0.470744	0.504723	0.448236	0.452635	0.464699	NA	NA	NA	NA	NA
RRS1	Q15050	Ribosome biogenesis regulatory protein homolog	grey	0.295011	0.325443	0.33479	0.576629	0.649665	0.556799	NA	NA	NA	NA	NA
WDR43	Q15061	WD repeat-containing protein 43	grey	0.47179	0.435281	0.481333	0.573536	0.657018	0.673079	NA	NA	NA	NA	NA
PDIA6	Q15084	Protein disulfide-isomerase A6	grey	0.61899	0.603114	0.650764	0.351098	0.368911	0.34773	NA	NA	NA	NA	NA
STK38	Q15208	Serine/threonine-protein kinase 38	grey	0.492447	0.421466	0.412878	0.27558	0.333721	0.259137	NA	NA	NA	NA	NA
PWP2	Q15269	Periodic tryptophan protein 2 homolog	grey	0.483287	0.457317	0.489112	0.632635	0.601998	0.670334	NA	NA	NA	NA	NA
RCN1	Q15293	Reticulocalbin-1	grey	0.282851	0.294513	0.37827	0.278937	0.256059	0.334473	NA	NA	NA	NA	NA
PCBP1	Q15365	Poly(rC)-binding protein 1	grey	0.480103	0.645511	0.647629	0.495929	0.552771	0.575906	NA	NA	NA	NA	NA
PCBP2	Q15366	Poly(rC)-binding protein 2	grey	0.532485	0.515772	0.552658	0.53738	0.568798	0.578453	NA	NA	NA	NA	NA
SF3B3	Q15393	Splicing factor 3B subunit 3	grey	0.408056	0.455755	0.54114	0.416007	0.44283	0.45401	NA	NA	NA	NA	NA
PUM3	Q15397	Pumilio homolog 3	grey	0.44322	0.295439	0.367909	0.639663	0.695633	0.593758	NA	NA	NA	NA	NA
DDB1	Q16531	DNA damage-binding protein 1	grey	0.522586	0.512355	0.552465	0.477109	0.476262	0.498552	NA	NA	NA	NA	NA
SRSF7	Q16629	Serine/arginine-rich splicing factor 7	grey	0.25901	0.174942	0.228482	0.485225	0.525318	0.479801	NA	NA	NA	NA	NA
IMMT	Q16891	MICOS complex subunit MIC60	grey	0.368189	0.376224	0.39118	0.23672	0.253497	0.283937	NA	NA	NA	NA	NA
HNRNPUL2-BSCL2, HNRNPUL2	H3BQZ7, Q1KMD3	HCG2044799, Heterogeneous nuclear ribonucleoprotein U-like protein 2	grey	0.389675	0.363318	0.398069	0.458854	0.49865	0.501604	NA	NA	NA	NA	NA
TUBB8	Q3ZCM7	Tubulin beta-8 chain	grey	NA	0.448519	0.463405	NA	0.33214	0.321234	NA	NA	NA	NA	NA
TIMM50	Q3ZCQ8	Mitochondrial import inner membrane translocase subunit TIM50	grey	0.341632	0.295264	0.308142	0.27231	0.277539	0.280963	NA	NA	NA	NA	NA
IPO5	O00410	Importin-5	grey	0.556743	0.529135	NA	0.325245	0.370448	0.408492	NA	NA	NA	NA	NA
ZNF326	Q5BKZ1	DBIRD complex subunit ZNF326	grey	0.570229	0.518805	0.573035	0.559994	0.559175	0.566949	NA	NA	NA	NA	NA
PPP6R3	Q5H9R7	Serine/threonine-protein phosphatase 6 regulatory subunit 3	grey	0.312588	0.288691	0.351131	0.316258	0.303907	0.309507	NA	NA	NA	NA	NA
AMER1	Q5JTC6	APC membrane recruitment protein 1	grey	0.246222	0.347807	0.297502	NA	0.359118	0.297016	NA	NA	NA	NA	NA
RRP12	Q5JTH9	RRP12-like protein	grey	0.461939	0.428068	0.499419	0.613755	0.58526	0.709238	NA	NA	NA	NA	NA
AARS2	Q5JTZ9	Alanine--tRNA ligase, mitochondrial	grey	NA	0.485496	0.467368	0.239976	0.266293	0.276409	NA	NA	NA	NA	NA
DNTTIP2	Q5QJE6	Deoxynucleotidyltransferase terminal-interacting protein 2	grey	0.447536	0.435439	0.463135	0.568068	0.587932	0.583258	NA	NA	NA	NA	NA
NOL9	Q5SY16	Polynucleotide 5'-hydroxyl-kinase NOL9	grey	0.438087	0.372033	0.383444	NA	0.35707	0.368376	NA	NA	NA	NA	NA
IGF2BP3	O00425	Insulin-like growth factor 2 mRNA-binding protein 3	grey	0.332201	0.303305	0.326543	0.512884	0.517656	0.539312	NA	NA	NA	NA	NA
EDC4	Q6P2E9	Enhancer of mRNA-decapping protein 4	grey	0.472836	0.53734	0.57094	0.39552	0.434597	0.423611	NA	NA	NA	NA	NA
PRPF8	Q6P2Q9	Pre-mRNA-processing-splicing factor 8	grey	0.454599	0.470522	0.491578	0.483868	0.479084	0.521405	NA	NA	NA	NA	NA
PES1	O00541	Pescadillo homolog	grey	0.441974	0.426959	0.456325	0.679448	0.644275	0.709076	NA	NA	NA	NA	NA
LARP1	Q6PKG0	La-related protein 1	grey	0.258721	0.232084	0.250007	0.459649	0.463116	0.466298	NA	NA	NA	NA	NA
HIST3H3, H3F3C, HIST2H3A;	Q16695, Q6NXT2, Q71DI3	Histone H3.1t, Histone H3.3C, Histone H3.2	grey	0.631013	0.599479	0.655987	0.706786	0.712271	0.750071	NA	NA	NA	NA	NA
LARP4	Q71RC2	La-related protein 4	grey	NA	0.397155	0.439466	0.463279	0.497462	0.491009	NA	NA	NA	NA	NA
TUBA3C, TUBA3E, TUBA1A	Q13748, Q6PEY2, Q71U36	Tubulin alpha-3C/D chain, Tubulin alpha-3E chain, Tubulin alpha-1A chain	grey	0.468655	0.387613	NA	0.356012	0.378868	NA	NA	NA	NA	NA	NA
SND1	Q7KZF4	Staphylococcal nuclease domain-containing protein 1	grey	0.598255	0.670208	0.695711	0.491946	0.511504	0.520016	NA	NA	NA	NA	NA
DHX30	Q7L2E3	Putative ATP-dependent RNA helicase DHX30	grey	0.357943	0.257862	0.371145	0.353988	0.345984	0.313652	NA	NA	NA	NA	NA
NOP56	O00567	Nucleolar protein 56	grey	0.412712	0.406721	0.431129	0.545722	0.569723	0.570457	NA	NA	NA	NA	NA
ZC3HAV1	Q7Z2W4	Zinc finger CCCH-type antiviral protein 1	grey	0.485364	0.513088	0.586615	0.509351	0.525731	0.544002	NA	NA	NA	NA	NA
DDX3X	O00571	ATP-dependent RNA helicase DDX3X	grey	0.608324	0.600535	0.625623	0.493709	0.502905	0.503921	NA	NA	NA	NA	NA
HUWE1	Q7Z6Z7	E3 ubiquitin-protein ligase HUWE1	grey	0.585535	0.540451	0.605963	0.323042	0.359398	0.366091	NA	NA	NA	NA	NA
KPNA4	O00629	Importin subunit alpha-3	grey	0.793333	0.776219	0.90002	0.668778	NA	0.718719	NA	NA	NA	NA	NA
ZC3H18	Q86VM9	Zinc finger CCCH domain-containing protein 18	grey	0.327689	0.313123	0.364591	0.269523	0.270452	0.292701	NA	NA	NA	NA	NA
CAND1	Q86VP6	Cullin-associated NEDD8-dissociated protein 1	grey	0.495755	0.467623	0.528962	0.33899	0.373969	0.398278	NA	NA	NA	NA	NA
WDR75	Q8IWA0	WD repeat-containing protein 75	grey	0.497477	0.453135	0.549424	0.60208	0.602011	0.65023	NA	NA	NA	NA	NA
SUGP2	Q8IX01	SURP and G-patch domain-containing protein 2	grey	0.414834	0.401632	0.433237	0.284687	0.352214	0.364489	NA	NA	NA	NA	NA
DNAJC10	Q8IXB1	DnaJ homolog subfamily C member 10	grey	0.365142	0.322006	0.328141	0.598175	NA	0.31584	NA	NA	NA	NA	NA
FTSJ3	Q8IY81	pre-rRNA processing protein FTSJ3	grey	0.418916	0.345917	0.374264	0.593415	0.61559	0.712294	NA	NA	NA	NA	NA
NUP93	Q8N1F7	Nuclear pore complex protein Nup93	grey	0.414208	0.425938	0.404941	0.251535	0.334264	0.362124	NA	NA	NA	NA	NA
ASCC3	Q8N3C0	Activating signal cointegrator 1 complex subunit 3	grey	0.527383	0.593413	0.583368	0.425116	0.453629	0.460015	NA	NA	NA	NA	NA
KRI1	Q8N9T8	Protein KRI1 homolog	grey	0.413972	0.406546	0.441739	0.59669	0.635227	NA	NA	NA	NA	NA	NA
ABCF1	Q8NE71	ATP-binding cassette sub-family F member 1	grey	0.547762	0.645809	0.673029	0.414802	0.502302	0.554665	NA	NA	NA	NA	NA
WDR36	Q8NI36	WD repeat-containing protein 36	grey	0.462335	0.445226	0.48262	0.607368	0.595444	0.585167	NA	NA	NA	NA	NA
COQ8A	Q8NI60	Atypical kinase COQ8A, mitochondrial	grey	0.201417	0.210316	0.202872	NA	0.225725	0.211468	NA	NA	NA	NA	NA
BRIX1	Q8TDN6	Ribosome biogenesis protein BRX1 homolog	grey	0.356113	0.324906	0.363782	0.628966	0.634051	0.667194	NA	NA	NA	NA	NA
UTP15	Q8TED0	U3 small nucleolar RNA-associated protein 15 homolog	grey	0.474947	0.425957	0.429471	0.585257	0.559302	0.59511	NA	NA	NA	NA	NA
GEMIN5	Q8TEQ6	Gem-associated protein 5	grey	NA	0.594503	0.570671	0.479438	0.43921	0.475811	NA	NA	NA	NA	NA
IPO4	Q8TEX9	Importin-4	grey	0.572439	0.528943	0.541426	0.471199	0.459779	0.512566	NA	NA	NA	NA	NA
NUP133	Q8WUM0	Nuclear pore complex protein Nup133	grey	0.296576	0.327335	0.347505	0.238775	0.344897	0.302248	NA	NA	NA	NA	NA
PDCD6IP	Q8WUM4	Programmed cell death 6-interacting protein	grey	0.523973	0.484357	0.545875	0.382479	0.436067	0.430719	NA	NA	NA	NA	NA
ATXN2L	Q8WWM7	Ataxin-2-like protein	grey	0.517669	0.489063	0.502796	0.549106	0.551084	0.541521	NA	NA	NA	NA	NA
IRS4	O14654	Insulin receptor substrate 4	grey	0.328247	0.322159	0.335046	0.2525	0.263173	0.271811	NA	NA	NA	NA	NA
DDX1	Q92499	ATP-dependent RNA helicase DDX1	grey	0.653161	0.661643	NA	0.372126	0.546396	0.491328	NA	NA	NA	NA	NA
HSPH1	Q92598	Heat shock protein 105 kDa	grey	0.65018	0.615303	0.604923	0.335521	0.375204	0.355931	NA	NA	NA	NA	NA
LARP4B	Q92615	La-related protein 4B	grey	0.435358	NA	0.660485	0.489459	NA	0.44602	NA	NA	NA	NA	NA
GCN1	Q92616	eIF-2-alpha kinase activator GCN1	grey	0.466326	0.446939	0.524651	0.435649	0.418287	0.460859	NA	NA	NA	NA	NA
NUP205	Q92621	Nuclear pore complex protein Nup205	grey	0.401561	0.417302	0.408545	0.302508	0.295554	0.31962	NA	NA	NA	NA	NA
PRMT5	O14744	Protein arginine N-methyltransferase 5	grey	0.534059	0.532549	0.586196	0.323358	0.371457	0.369562	NA	NA	NA	NA	NA
DDX17	Q92841	Probable ATP-dependent RNA helicase DDX17	grey	0.507797	0.507582	0.52339	0.433089	0.434267	0.423959	NA	NA	NA	NA	NA
KHSRP	Q92945	Far upstream element-binding protein 2	grey	0.421507	0.316482	0.372428	0.474147	0.373261	0.447895	NA	NA	NA	NA	NA
TNPO1	Q92973	Transportin-1	grey	0.527269	0.616037	NA	0.397737	0.406746	NA	NA	NA	NA	NA	NA
UTP4	Q969X6	U3 small nucleolar RNA-associated protein 4 homolog	grey	0.475721	0.432466	0.496456	0.62598	0.627834	0.61063	NA	NA	NA	NA	NA
GPRASP2	Q96D09	G-protein coupled receptor-associated sorting protein 2	grey	NA	0.361558	0.439787	0.313358	0.367887	0.372143	NA	NA	NA	NA	NA
DNAJA3	Q96EY1	DnaJ homolog subfamily A member 3, mitochondrial	grey	0.324259	0.359185	0.34988	NA	0.239735	0.394405	NA	NA	NA	NA	NA
DDX27	Q96GQ7	Probable ATP-dependent RNA helicase DDX27	grey	0.40822	0.360409	0.415814	0.610801	0.623881	0.589564	NA	NA	NA	NA	NA
IPO9	Q96P70	Importin-9	grey	0.477107	0.425503	0.471165	0.298718	0.30706	0.333494	NA	NA	NA	NA	NA
RBM14	Q96PK6	RNA-binding protein 14	grey	0.717164	0.669878	0.801396	0.681487	0.708987	0.745547	NA	NA	NA	NA	NA
MMS19	Q96T76	MMS19 nucleotide excision repair protein homolog	grey	NA	0.235402	0.300412	NA	0.271285	0.302051	NA	NA	NA	NA	NA
PSMD1	Q99460	26S proteasome non-ATPase regulatory subunit 1	grey	0.56387	0.519786	0.524586	0.308374	0.337567	0.339573	NA	NA	NA	NA	NA
EIF3CL, EIF3C	B5ME19, Q99613	Eukaryotic translation initiation factor 3 subunit C-like protein, Eukaryotic translation initiation factor 3 subunit C	grey	0.542881	0.561424	0.530297	0.401141	0.434363	0.404881	NA	NA	NA	NA	NA
PHB2	Q99623	Prohibitin-2	grey	0.60834	0.636416	0.576735	0.281494	0.296814	0.329819	NA	NA	NA	NA	NA
ATXN2	Q99700	Ataxin-2	grey	0.425768	0.394253	0.422953	0.460151	0.547346	0.547845	NA	NA	NA	NA	NA
HNRNPAB	Q99729	Heterogeneous nuclear ribonucleoprotein A/B	grey	0.557821	0.52169	NA	0.53559	0.547549	NA	NA	NA	NA	NA	NA
CCT7	Q99832	T-complex protein 1 subunit eta	grey	0.572978	0.637659	0.683431	0.265965	0.3648	0.340037	NA	NA	NA	NA	NA
EBNA1BP2	Q99848	Probable rRNA-processing protein EBP2	grey	0.369218	0.364805	0.393609	0.679139	0.709118	0.734534	NA	NA	NA	NA	NA
XPO1	O14980	Exportin-1	grey	0.435865	0.431289	0.471201	0.284402	0.352622	0.402677	NA	NA	NA	NA	NA
GRWD1	Q9BQ67	Glutamate-rich WD repeat-containing protein 1	grey	0.446428	0.497233	0.551326	0.472923	0.428608	0.415948	NA	NA	NA	NA	NA
TUBA1C	Q9BQE3	Tubulin alpha-1C chain	grey	NA	0.489826	0.515251	0.312499	0.375432	0.363225	NA	NA	NA	NA	NA
MYBBP1A	Q9BQG0	Myb-binding protein 1A	grey	0.428643	0.408326	0.438649	0.52596	0.5329	NA	NA	NA	NA	NA	NA
SEC16A	O15027	Protein transport protein Sec16A	grey	NA	0.36689	0.364817	NA	0.371308	0.319651	NA	NA	NA	NA	NA
TUBB6	Q9BUF5	Tubulin beta-6 chain	grey	NA	0.543058	0.460446	0.259708	0.306575	0.30759	NA	NA	NA	NA	NA
HNRNPUL1	Q9BUJ2	Heterogeneous nuclear ribonucleoprotein U-like protein 1	grey	0.463761	0.431781	0.466221	0.58596	0.552639	0.600235	NA	NA	NA	NA	NA
TUBB2B	Q9BVA1	Tubulin beta-2B chain	grey	0.529284	0.544281	0.590064	0.324014	0.354453	0.357632	NA	NA	NA	NA	NA
UTP14A	Q9BVJ6	U3 small nucleolar RNA-associated protein 14 homolog A	grey	0.450328	0.402192	0.451468	0.546007	0.654486	NA	NA	NA	NA	NA	NA
MAK16	Q9BXY0	Protein MAK16 homolog	grey	0.376749	0.365111	NA	NA	0.604674	0.721711	NA	NA	NA	NA	NA
GTPBP4	Q9BZE4	Nucleolar GTP-binding protein 1	grey	0.440559	0.411386	0.456501	0.626507	0.662808	0.674662	NA	NA	NA	NA	NA
WDR12	Q9GZL7	Ribosome biogenesis protein WDR12	grey	0.716056	0.473947	NA	NA	0.550518	0.623931	NA	NA	NA	NA	NA
CLPB	Q9H078	Caseinolytic peptidase B protein homolog	grey	0.354649	0.319041	0.346173	0.276026	0.250431	0.245616	NA	NA	NA	NA	NA
NAT10	Q9H0A0	RNA cytidine acetyltransferase	grey	0.452107	0.438912	0.447358	0.625546	0.657418	0.6692	NA	NA	NA	NA	NA
PNN	Q9H307	Pinin	grey	0.476109	0.471664	0.512656	0.598038	0.601527	0.606243	NA	NA	NA	NA	NA
WDR46	O15213	WD repeat-containing protein 46	grey	0.529577	0.466099	0.411692	NA	0.629164	0.508214	NA	NA	NA	NA	NA
HEATR1	Q9H583	HEAT repeat-containing protein 1	grey	0.405352	0.391329	0.401973	0.487964	0.465072	0.497932	NA	NA	NA	NA	NA
RPF2	Q9H7B2	Ribosome production factor 2 homolog	grey	0.382082	0.350967	0.405692	0.676403	0.685236	0.717552	NA	NA	NA	NA	NA
NKRF	O15226	NF-kappa-B-repressing factor	grey	0.453365	0.403929	NA	0.527812	0.491778	0.598271	NA	NA	NA	NA	NA
NT5DC2	Q9H857	5'-nucleotidase domain-containing protein 2	grey	NA	0.368748	0.334195	NA	0.233883	0.249949	NA	NA	NA	NA	NA
NOL11	Q9H8H0	Nucleolar protein 11	grey	0.465039	0.43144	0.474459	0.605074	0.591335	0.557131	NA	NA	NA	NA	NA
CASC3	O15234	Protein CASC3	grey	0.178013	0.287648	0.327125	0.480749	0.49412	0.492184	NA	NA	NA	NA	NA
WDR6	Q9NNW5	WD repeat-containing protein 6	grey	0.431797	0.427827	0.40994	0.315381	0.309104	0.314962	NA	NA	NA	NA	NA
DDX21	Q9NR30	Nucleolar RNA helicase 2	grey	0.48254	0.464741	0.47809	0.566217	0.530054	0.510536	NA	NA	NA	NA	NA
PPM1G	O15355	Protein phosphatase 1G	grey	NA	0.551381	0.523097	0.329677	0.359269	0.387055	NA	NA	NA	NA	NA
STAU2	Q9NUL3	Double-stranded RNA-binding protein Staufen homolog 2	grey	NA	0.360019	0.422485	NA	0.506143	0.478075	NA	NA	NA	NA	NA
EIF3D	O15371	Eukaryotic translation initiation factor 3 subunit D	grey	0.471827	0.488775	0.447739	0.303283	0.325576	0.343954	NA	NA	NA	NA	NA
ATAD3A	Q9NVI7	ATPase family AAA domain-containing protein 3A	grey	0.348334	0.357992	0.335087	0.29425	0.30214	0.310618	NA	NA	NA	NA	NA
DDX18	Q9NVP1	ATP-dependent RNA helicase DDX18	grey	0.413777	0.397567	NA	0.712488	0.631834	NA	NA	NA	NA	NA	NA
RBM28	Q9NW13	RNA-binding protein 28	grey	0.422455	0.358929	0.414016	0.505334	0.632325	0.624417	NA	NA	NA	NA	NA
BCLAF1	Q9NYF8	Bcl-2-associated transcription factor 1	grey	0.127103	0.077082	0.28341	0.19452	0.234403	NA	NA	NA	NA	NA	NA
FAM120A	Q9NZB2	Constitutive coactivator of PPAR-gamma-like protein 1	grey	0.450892	0.4672	0.510538	0.495549	0.505281	0.524328	NA	NA	NA	NA	NA
IGF2BP1	Q9NZI8	Insulin-like growth factor 2 mRNA-binding protein 1	grey	0.343151	0.305386	0.343507	0.532458	0.529723	0.54033	NA	NA	NA	NA	NA
HACD3	Q9P035	Very-long-chain	grey	0.432285	0.461001	NA	0.275349	0.315698	0.325849	NA	NA	NA	NA	NA
LARS	Q9P2J5	Leucine--tRNA ligase, cytoplasmic	grey	0.486548	0.50142	0.515167	0.322562	0.362474	0.350756	NA	NA	NA	NA	NA
DNAJB11	Q9UBS4	DnaJ homolog subfamily B member 11	grey	0.313013	0.311444	NA	NA	0.42766	0.365767	NA	NA	NA	NA	NA
PARP2	Q9UGN5	Poly [ADP-ribose] polymerase 2	grey	0.905864	0.850193	0.682819	0.692257	0.81539	0.809646	NA	NA	NA	NA	NA
MKRN1	Q9UHC7	E3 ubiquitin-protein ligase makorin-1	grey	0.26113	0.252508	0.246052	0.464244	0.531354	0.539312	NA	NA	NA	NA	NA
DHX15	O43143	Pre-mRNA-splicing factor ATP-dependent RNA helicase DHX15	grey	0.42973	0.406922	0.488708	0.384446	0.391182	0.427153	NA	NA	NA	NA	NA
PJA2	O43164	E3 ubiquitin-protein ligase Praja-2	grey	0.487201	0.433535	0.469235	NA	0.401336	0.457536	NA	NA	NA	NA	NA
SLC25A13	Q9UJS0	Calcium-binding mitochondrial carrier protein Aralar2	grey	0.331686	0.377967	0.365287	0.316773	0.314219	0.337566	NA	NA	NA	NA	NA
STOML2	Q9UJZ1	Stomatin-like protein 2, mitochondrial	grey	NA	0.474554	0.48583	0.292651	0.289148	0.308469	NA	NA	NA	NA	NA
MRTO4	Q9UKD2	mRNA turnover protein 4 homolog	grey	0.370742	0.339025	0.372122	0.568516	0.679723	0.72439	NA	NA	NA	NA	NA
RALY	Q9UKM9	RNA-binding protein Raly	grey	0.709369	0.595571	0.737388	0.746103	0.742233	0.779366	NA	NA	NA	NA	NA
ACIN1	Q9UKV3	Apoptotic chromatin condensation inducer in the nucleus	grey	0.425895	0.400014	0.508892	0.563809	0.555779	0.653987	NA	NA	NA	NA	NA
AKAP8L	Q9ULX6	A-kinase anchor protein 8-like	grey	0.361612	0.345775	0.361576	0.311116	0.339938	0.356725	NA	NA	NA	NA	NA
PRPF19	Q9UMS4	Pre-mRNA-processing factor 19	grey	0.430037	0.480676	0.479831	0.426963	0.428111	0.439457	NA	NA	NA	NA	NA
MAGED2	Q9UNF1	Melanoma-associated antigen D2	grey	NA	0.502283	0.542799	0.353958	0.28795	0.363648	NA	NA	NA	NA	NA
PHGDH	O43175	D-3-phosphoglycerate dehydrogenase	grey	0.684111	0.654435	0.690098	0.398877	0.423041	0.428464	NA	NA	NA	NA	NA
WDR3	Q9UNX4	WD repeat-containing protein 3	grey	0.492072	0.435096	0.496324	0.624544	0.639744	0.713313	NA	NA	NA	NA	NA
PPP6R1	Q9UPN7	Serine/threonine-protein phosphatase 6 regulatory subunit 1	grey	0.360711	0.34164	0.372704	NA	0.271889	0.348199	NA	NA	NA	NA	NA
DICER1	Q9UPY3	Endoribonuclease Dicer	grey	0.262898	0.310797	0.348416	0.435496	0.450973	NA	NA	NA	NA	NA	NA
PSMD3	O43242	26S proteasome non-ATPase regulatory subunit 3	grey	0.593102	0.54187	0.596768	0.384225	0.409	0.406729	NA	NA	NA	NA	NA
PA2G4	Q9UQ80	Proliferation-associated protein 2G4	grey	NA	0.655453	0.690836	0.359423	0.383181	0.397613	NA	NA	NA	NA	NA
SMC3	Q9UQE7	Structural maintenance of chromosomes protein 3	grey	0.314038	0.365589	0.405733	0.371664	0.319948	0.381524	NA	NA	NA	NA	NA
RUVBL2	Q9Y230	RuvB-like 2	grey	0.590844	0.549924	0.6616	0.339188	0.382724	0.396905	NA	NA	NA	NA	NA
EIF3L	Q9Y262	Eukaryotic translation initiation factor 3 subunit L	grey	0.68327	0.663093	0.761262	0.386756	0.428639	0.441401	NA	NA	NA	NA	NA
RUVBL1	Q9Y265	RuvB-like 1	grey	0.573943	0.558634	0.568825	0.370733	0.393161	0.365466	NA	NA	NA	NA	NA
THRAP3	Q9Y2W1	Thyroid hormone receptor-associated protein 3	grey	0.163693	0.089834	0.287314	0.230082	0.218521	0.360078	NA	NA	NA	NA	NA
NOP58	Q9Y2X3	Nucleolar protein 58	grey	0.427814	0.388933	0.439579	0.578917	0.553232	0.561438	NA	NA	NA	NA	NA
STRAP	Q9Y3F4	Serine-threonine kinase receptor-associated protein	grey	0.613852	0.632854	0.689784	0.416144	0.453515	0.443812	NA	NA	NA	NA	NA
NOC2L	Q9Y3T9	Nucleolar complex protein 2 homolog	grey	0.412743	0.412577	0.461238	0.512073	0.511924	0.351869	NA	NA	NA	NA	NA
RPL36	Q9Y3U8	60S ribosomal protein L36	grey	0.361752	0.328914	0.387121	0.649249	0.613029	0.753936	NA	NA	NA	NA	NA
TBL2	Q9Y4P3	Transducin beta-like protein 2	grey	NA	0.791204	0.681324	NA	0.555649	0.563255	NA	NA	NA	NA	NA
LAS1L	Q9Y4W2	Ribosomal biogenesis protein LAS1L	grey	0.406271	0.361061	0.391	0.366815	0.374867	0.366141	NA	NA	NA	NA	NA
HNRNPR	O43390	Heterogeneous nuclear ribonucleoprotein R	grey	NA	0.56605	0.655896	0.476674	0.559239	0.619541	NA	NA	NA	NA	NA
YTHDF2	Q9Y5A9	YTH domain-containing family protein 2	grey	0.354104	0.400608	0.36735	0.34302	0.351367	0.403678	NA	NA	NA	NA	NA
SUPT16H	Q9Y5B9	FACT complex subunit SPT16	grey	0.572271	0.573058	0.63494	0.514887	0.511824	0.545952	NA	NA	NA	NA	NA
UTP18	Q9Y5J1	U3 small nucleolar RNA-associated protein 18 homolog	grey	0.497741	0.499638	0.530434	0.602937	0.676433	0.643564	NA	NA	NA	NA	NA
SRPRB	Q9Y5M8	Signal recognition particle receptor subunit beta	grey	NA	0.664499	0.729363	0.5799	0.512023	NA	NA	NA	NA	NA	NA
GTF3C3	Q9Y5Q9	General transcription factor 3C polypeptide 3	grey	0.344315	0.363294	0.345417	NA	0.313936	0.344968	NA	NA	NA	NA	NA
RBM8A	Q9Y5S9	RNA-binding protein 8A	grey	0.430392	0.371285	NA	0.572332	0.554509	0.603329	NA	NA	NA	NA	NA
MAGED1	Q9Y5V3	Melanoma-associated antigen D1	grey	0.456054	0.425708	0.47103	0.286431	0.396237	0.332507	NA	NA	NA	NA	NA
DYNC1LI1	Q9Y6G9	Cytoplasmic dynein 1 light intermediate chain 1	grey	NA	0.370029	0.338932	NA	0.34105	0.333178	NA	NA	NA	NA	NA
IGF2BP2	Q9Y6M1	Insulin-like growth factor 2 mRNA-binding protein 2	grey	0.322438	0.326523	0.400945	0.469662	0.477214	0.503128	NA	NA	NA	NA	NA
EPB41L2	O43491	Band 4.1-like protein 2	grey	NA	0.546903	0.592341	0.294054	0.358395	0.311504	NA	NA	NA	NA	NA
XPOT	O43592	Exportin-T	grey	0.40421	0.433628	0.43579	0.368327	0.367503	0.446887	NA	NA	NA	NA	NA
ACTN4	O43707	Alpha-actinin-4	grey	0.619996	0.581038	0.621072	0.335417	0.353656	0.367121	NA	NA	NA	NA	NA
CALU	O43852	Calumenin	grey	0.232028	0.208623	0.225349	0.205267	0.208405	0.223368	NA	NA	NA	NA	NA
RAD21	O60216	Double-strand-break repair protein rad21 homolog	grey	0.334334	0.43504	0.384002	0.438281	0.323461	0.393626	NA	NA	NA	NA	NA
MCM3AP	O60318	Germinal-center associated nuclear protein	grey	NA	0.372206	0.358044	NA	0.314281	0.330246	NA	NA	NA	NA	NA
HIST1H2BK, H2BFS, HIST1H2BD, HIST1H2BC, HIST2H2BF, HIST1H2BH, HIST1H2BA, HIST1H2BN, HIST1H2BM, HIST1H2BL	O60814, P57053, P58876, P62807, Q5QNW6, Q93079, Q96A08, Q99877, Q99879, Q99880	Histone H2B type 1-K, Histone H2B type F-S, Histone H2B type 1-D, Histone H2B type 1-C/E/F/G/I, Histone H2B type 2-F, Histone H2B type 1-H, Histone H2B type 1-A, Histone H2B type 1-N, Histone H2B type 1-M, Histone H2B type 1-L	grey	0.581485	0.566429	0.619329	0.660269	0.67053	0.711404	NA	NA	NA	NA	NA
DKC1	O60832	H/ACA ribonucleoprotein complex subunit 4	grey	0.391177	0.330035	0.444628	0.540295	0.589832	NA	NA	NA	NA	NA	NA
DNAJA2	O60884	DnaJ homolog subfamily A member 2	grey	0.348686	0.321213	0.346338	0.26967	0.299397	0.292036	NA	NA	NA	NA	NA
ZC3H11A	O75152	Zinc finger CCCH domain-containing protein 11A	grey	0.326107	0.192549	0.337736	0.550385	0.62425	NA	NA	NA	NA	NA	NA
H2AFY	O75367	Core histone macro-H2A.1	grey	0.564991	0.597658	0.634806	0.603217	0.620394	0.640587	NA	NA	NA	NA	NA
FLNB	O75369	Filamin-B	grey	0.578428	0.579263	0.541567	0.366503	0.357876	0.384732	NA	NA	NA	NA	NA
SRSF10	O75494	Serine/arginine-rich splicing factor 10	grey	0.271294	0.214013	0.388581	0.634194	0.70423	NA	NA	NA	NA	NA	NA
GMNN	O75496	Geminin	grey	0.177002	0.16791	0.191241	0.324711	0.380403	0.351119	NA	NA	NA	NA	NA
SF3B1	O75533	Splicing factor 3B subunit 1	grey	0.357562	0.421043	0.406652	0.40535	0.406603	0.439872	NA	NA	NA	NA	NA
SNRNP200	O75643	U5 small nuclear ribonucleoprotein 200 kDa helicase	grey	0.469985	0.463105	0.517207	0.465636	0.449837	0.474068	NA	NA	NA	NA	NA
NUP155	O75694	Nuclear pore complex protein Nup155	grey	NA	0.480384	0.456034	0.333681	0.281758	0.325286	NA	NA	NA	NA	NA
RSL1D1	O76021	Ribosomal L1 domain-containing protein 1	grey	0.449382	0.387554	0.42182	0.599595	0.563843	NA	NA	NA	NA	NA	NA
FARP2	O94887	FERM, RhoGEF and pleckstrin domain-containing protein 2	grey	0.30598	0.213542	0.337876	NA	0.262698	0.203843	NA	NA	NA	NA	NA
BAG2	O95816	BAG family molecular chaperone regulator 2	grey	0.258932	0.298005	0.307637	0.21926	0.247303	0.283418	NA	NA	NA	NA	NA
AIFM1	O95831	Apoptosis-inducing factor 1, mitochondrial	grey	0.352079	0.360505	0.370914	0.272557	0.304044	0.29937	NA	NA	NA	NA	NA
LDHA	P00338	L-lactate dehydrogenase A chain	grey	0.674886	0.699919	0.722146	0.352789	0.357131	0.372976	NA	NA	NA	NA	NA
GLUD1, GLUD2	P00367, P49448	Glutamate dehydrogenase 1, mitochondrial, Glutamate dehydrogenase 2, mitochondrial	grey	0.540336	0.547436	0.588014	0.251777	0.324411	0.310874	NA	NA	NA	NA	NA
LMNA	P02545	Prelamin-A/C [Cleaved into: Lamin-A/C	grey	NA	0.301416	0.353615	0.281796	0.354449	0.340254	NA	NA	NA	NA	NA
ALDOA	P04075	Fructose-bisphosphate aldolase A	grey	0.759432	0.68904	0.745719	0.317053	0.358272	0.361343	NA	NA	NA	NA	NA
GAPDH	P04406	Glyceraldehyde-3-phosphate dehydrogenase	grey	0.638927	0.664861	0.671979	0.356199	0.36535	0.364234	NA	NA	NA	NA	NA
TP53	P04637	Cellular tumor antigen p53	grey	0.423677	0.395075	0.599118	0.426379	0.494293	NA	NA	NA	NA	NA	NA
RPN1	P04843	Dolichyl-diphosphooligosaccharide--protein glycosyltransferase subunit 1	grey	0.475609	0.526104	0.521392	0.300605	0.302808	0.305598	NA	NA	NA	NA	NA
RPN2	P04844	Dolichyl-diphosphooligosaccharide--protein glycosyltransferase subunit 2	grey	0.485152	0.52645	0.604846	0.309162	0.327023	0.353909	NA	NA	NA	NA	NA
ATP1A1	P05023	Sodium/potassium-transporting ATPase subunit alpha-1	grey	0.371611	0.393867	0.394653	0.243224	0.277776	0.279151	NA	NA	NA	NA	NA
SLC25A5	P05141	ADP/ATP translocase 2	grey	0.379327	0.409418	0.409557	0.28956	0.321636	0.34088	NA	NA	NA	NA	NA
RPLP0, RPLP0P6	P05388, Q8NHW5	60S acidic ribosomal protein P0, 60S acidic ribosomal protein P0-like	grey	0.341223	0.318276	0.380924	0.575629	0.57117	0.605329	NA	NA	NA	NA	NA
ATP5B	P06576	ATP synthase subunit beta, mitochondrial	grey	0.596137	0.601632	0.573213	0.324247	0.33941	0.355087	NA	NA	NA	NA	NA
ENO1	P06733	Alpha-enolase	grey	0.690295	0.636126	0.706261	0.355114	0.389781	0.389117	NA	NA	NA	NA	NA
PYGL	P06737	Glycogen phosphorylase, liver form	grey	0.599421	0.313426	0.681929	0.323116	0.343273	0.330749	NA	NA	NA	NA	NA
NPM1	P06748	Nucleophosmin	grey	0.505769	0.497769	0.54219	0.483209	0.49661	0.518422	NA	NA	NA	NA	NA
LDHB	P07195	L-lactate dehydrogenase B chain	grey	0.680698	0.681577	0.711609	0.345768	0.368727	0.375917	NA	NA	NA	NA	NA
NEFL	P07196	Neurofilament light polypeptide	grey	0.282263	0.206466	0.289495	NA	0.326364	0.23831	NA	NA	NA	NA	NA
EPRS	P07814	Bifunctional glutamate/proline--tRNA ligase	grey	0.503013	0.481966	0.517793	0.332038	0.364105	0.371032	NA	NA	NA	NA	NA
HNRNPC	P07910	Heterogeneous nuclear ribonucleoproteins C1/C2	grey	0.776674	0.742188	0.854969	0.760893	0.759619	0.812843	NA	NA	NA	NA	NA
SLC3A2	P08195	4F2 cell-surface antigen heavy chain	grey	0.522006	0.437311	0.630659	0.307432	0.294056	0.326294	NA	NA	NA	NA	NA
SNRNP70	P08621	U1 small nuclear ribonucleoprotein 70 kDa	grey	0.297416	0.277629	0.320933	0.429782	0.497589	0.499597	NA	NA	NA	NA	NA
VIM	P08670	Vimentin	grey	0.438452	0.435584	0.459223	0.353708	0.406072	0.40507	NA	NA	NA	NA	NA
RPSA	P08865	40S ribosomal protein SA	grey	0.603986	0.587532	0.595081	0.444665	0.455312	0.429518	NA	NA	NA	NA	NA
HNRNPA1, HNRNPA1L2	P09651, Q32P51	Heterogeneous nuclear ribonucleoprotein A1, Heterogeneous nuclear ribonucleoprotein A1-like 2	grey	0.533351	0.484141	0.559941	0.571845	0.547582	0.556429	NA	NA	NA	NA	NA
HIST1H2AG, HIST1H2AD, HIST1H2AH, HIST1H2AJ, H2AFJ	A0A0U1RRH7, P0C0S8, P20671, Q96KK5, Q99878, Q9BTM1	Histone H2A, Histone H2A type 1, Histone H2A type 1-D, Histone H2A type 1-H, Histone H2A type 1-J, Histone H2A.J	grey	0.571935	0.557959	0.632379	0.660278	0.687371	0.727305	NA	NA	NA	NA	NA
U2AF1L5, U2AF1	P0DN76, Q01081	Splicing factor U2AF 35 kDa subunit-like protein, Splicing factor U2AF 35 kDa subunit	grey	0.657225	0.676149	0.718242	NA	0.634629	0.616116	NA	NA	NA	NA	NA
HSPD1	P10809	60 kDa heat shock protein, mitochondrial	grey	0.276513	0.287331	0.295069	0.23364	0.268067	0.272168	NA	NA	NA	NA	NA
HSPA5	P11021	78 kDa glucose-regulated protein	grey	0.320677	0.315159	0.321993	0.252218	0.248273	0.263502	NA	NA	NA	NA	NA
TOP2A	P11388	DNA topoisomerase 2-alpha	grey	0.461954	0.439506	0.462551	0.357482	0.375541	0.410791	NA	NA	NA	NA	NA
MTHFD1	P11586	C-1-tetrahydrofolate synthase, cytoplasmic	grey	0.65678	0.662683	0.64651	0.325448	0.362624	0.358446	NA	NA	NA	NA	NA
SLC25A6	P12236	ADP/ATP translocase 3	grey	NA	0.481304	0.506645	0.316985	0.33776	0.375846	NA	NA	NA	NA	NA
IMPDH2	P12268	Inosine-5'-monophosphate dehydrogenase 2	grey	0.44842	0.654355	0.661556	0.358606	0.432645	0.410851	NA	NA	NA	NA	NA
CKB	P12277	Creatine kinase B-type	grey	0.682175	0.571812	0.666769	0.430657	0.406014	0.40296	NA	NA	NA	NA	NA
XRCC6	P12956	X-ray repair cross-complementing protein 6	grey	0.710174	0.698339	0.793623	0.565456	0.584015	0.620762	NA	NA	NA	NA	NA
XRCC5	P13010	X-ray repair cross-complementing protein 5	grey	0.699655	0.665733	0.71739	0.540953	0.520535	0.566702	NA	NA	NA	NA	NA
EEF2	P13639	Elongation factor 2	grey	0.639353	0.661099	0.683418	0.362177	0.383909	0.404272	NA	NA	NA	NA	NA
PDIA4	P13667	Protein disulfide-isomerase A4	grey	NA	0.632094	0.740923	0.348512	0.34466	0.34058	NA	NA	NA	NA	NA
PLS3	P13797	Plastin-3	grey	0.569437	0.601358	0.736662	0.341287	0.395809	0.407417	NA	NA	NA	NA	NA
PKM	P14618	Pyruvate kinase PKM	grey	0.677839	0.685985	0.716018	0.323308	0.361912	0.351974	NA	NA	NA	NA	NA
HSP90B1	P14625	Endoplasmin	grey	0.630372	0.691487	0.663479	0.320785	0.360942	0.375716	NA	NA	NA	NA	NA
SNRPB, SNRPN	P14678, P63162	Small nuclear ribonucleoprotein-associated proteins B and B', Small nuclear ribonucleoprotein-associated protein N	grey	NA	0.426152	0.508422	0.599595	NA	0.559733	NA	NA	NA	NA	NA
HNRNPL	P14866	Heterogeneous nuclear ribonucleoprotein L	grey	0.494286	0.466476	0.526278	0.483068	0.539327	0.511463	NA	NA	NA	NA	NA
DARS	P14868	Aspartate--tRNA ligase, cytoplasmic	grey	NA	0.543259	0.630813	0.325042	0.367199	0.366886	NA	NA	NA	NA	NA
RPS2	P15880	40S ribosomal protein S2	grey	0.499893	0.510489	0.530613	0.37411	0.457424	0.437851	NA	NA	NA	NA	NA
ATP2A2	P16615	Sarcoplasmic/endoplasmic reticulum calcium ATPase 2	grey	0.480249	0.513636	0.512981	0.35341	0.361795	0.379261	NA	NA	NA	NA	NA
YBX3	P16989	Y-box-binding protein 3	grey	0.399605	0.299975	0.34248	0.490352	0.550318	0.5262	NA	NA	NA	NA	NA
CTPS1	P17812	CTP synthase 1	grey	NA	0.603355	0.743404	0.300195	0.38875	0.363229	NA	NA	NA	NA	NA
DDX5	P17844	Probable ATP-dependent RNA helicase DDX5	grey	NA	0.505962	0.547138	0.411001	0.452279	0.391449	NA	NA	NA	NA	NA
PFKL	P17858	ATP-dependent 6-phosphofructokinase, liver type	grey	NA	0.427983	0.38466	NA	0.292946	0.323026	NA	NA	NA	NA	NA
PSMC3	P17980	26S protease regulatory subunit 6A	grey	NA	0.522527	0.458682	0.358841	0.32336	0.355489	NA	NA	NA	NA	NA
TCP1	P17987	T-complex protein 1 subunit alpha	grey	0.554571	0.510003	0.534575	0.292231	0.313458	0.326355	NA	NA	NA	NA	NA
RPL7	P18124	60S ribosomal protein L7	grey	0.34411	0.356702	0.405455	0.624011	0.644709	0.661434	NA	NA	NA	NA	NA
SON	P18583	Protein SON	grey	0.376382	0.289963	0.382005	NA	0.329558	0.346299	NA	NA	NA	NA	NA
RPL17-C18orf32, RPL17	A0A0A6YYL6, P18621	Protein RPL17-C18orf32, 60S ribosomal protein L17	grey	0.412229	0.414743	0.436556	0.404143	0.462821	0.43128	NA	NA	NA	NA	NA
NCL	P19338	Nucleolin	grey	0.512045	0.422959	NA	0.556784	0.543194	0.548095	NA	NA	NA	NA	NA
LMNB1	P20700	Lamin-B1	grey	0.292088	0.275785	0.313364	0.261826	0.289959	0.303454	NA	NA	NA	NA	NA
FLNA	P21333	Filamin-A	grey	0.397868	0.480384	0.522431	0.374018	0.353905	0.371126	NA	NA	NA	NA	NA
FBL	P22087	rRNA 2'-O-methyltransferase fibrillarin	grey	0.409481	0.385484	0.40007	0.540038	0.555113	0.519821	NA	NA	NA	NA	NA
GART	P22102	Trifunctional purine biosynthetic protein adenosine-3 [Includes: Phosphoribosylamine--glycine ligase	grey	0.607177	0.627956	0.627315	0.332523	0.372173	0.385003	NA	NA	NA	NA	NA
UBA1	P22314	Ubiquitin-like modifier-activating enzyme 1	grey	0.696291	0.678515	0.688524	0.326211	0.364122	0.36307	NA	NA	NA	NA	NA
HNRNPA2B1	P22626	Heterogeneous nuclear ribonucleoproteins A2/B1	grey	0.259642	0.192472	0.234459	0.520091	0.579254	0.573037	NA	NA	NA	NA	NA
RPS3	P23396	40S ribosomal protein S3	grey	0.431804	0.43879	0.51802	0.43524	0.443849	0.429716	NA	NA	NA	NA	NA
ATP5A1	P25705	ATP synthase subunit alpha, mitochondrial	grey	0.565126	0.599002	0.629768	0.30093	0.351415	0.352521	NA	NA	NA	NA	NA
ORF2	O00370		grey	0.5	0.5	0.5	0.5	0.5	0.5	0.5	0.5	NA	1	1
RPL13	P26373	60S ribosomal protein L13	grey	0.367978	0.3957	0.440046	0.554587	0.605786	0.575366	NA	NA	NA	NA	NA
PTBP1	P26599	Polypyrimidine tract-binding protein 1	grey	0.511488	0.570346	0.596047	NA	0.503817	0.530066	NA	NA	NA	NA	NA
TARS	P26639	Threonine--tRNA ligase, cytoplasmic	grey	0.610023	0.677031	0.652628	0.597173	0.406173	0.400453	NA	NA	NA	NA	NA
EEF1G	P26641	Elongation factor 1-gamma	grey	0.561983	0.574713	0.58768	0.372165	0.392309	0.399149	NA	NA	NA	NA	NA
RPL10	P27635	60S ribosomal protein L10	grey	0.376969	0.444608	0.459364	0.419565	0.478278	0.491793	NA	NA	NA	NA	NA
RPA1	P27694	Replication protein A 70 kDa DNA-binding subunit	grey	0.73043	0.723318	0.807464	0.609196	0.596418	0.610503	NA	NA	NA	NA	NA
CAD	P27708	CAD protein [Includes: Glutamine-dependent carbamoyl-phosphate synthase	grey	0.505645	0.508236	0.521066	0.325811	0.360981	0.35954	NA	NA	NA	NA	NA
CANX	P27824	Calnexin	grey	0.494478	0.570488	0.693893	0.320223	0.351765	0.361609	NA	NA	NA	NA	NA
TKT	P29401	Transketolase	grey	0.711541	0.647591	0.758229	0.308905	0.338961	0.344659	NA	NA	NA	NA	NA
RPL12	P30050	60S ribosomal protein L12	grey	0.330989	0.332705	0.371398	0.610071	0.646775	0.67621	NA	NA	NA	NA	NA
PDIA3	P30101	Protein disulfide-isomerase A3	grey	NA	0.567671	0.789651	NA	0.389836	0.38921	NA	NA	NA	NA	NA
PPP2R1A	P30153	Serine/threonine-protein phosphatase 2A 65 kDa regulatory subunit A alpha isoform	grey	0.510832	0.527356	NA	0.276347	0.389479	0.411172	NA	NA	NA	NA	NA
DNAJA1	P31689	DnaJ homolog subfamily A member 1	grey	0.332273	0.339357	0.365246	0.251797	0.277674	0.290804	NA	NA	NA	NA	NA
ATIC	P31939	Bifunctional purine biosynthesis protein PURH [Cleaved into: Bifunctional purine biosynthesis protein PURH, N-terminally processed] [Includes: Phosphoribosylaminoimidazolecarboxamide formyltransferase	grey	0.695969	0.576321	NA	0.362584	0.413164	0.421215	NA	NA	NA	NA	NA
HNRNPH3	P31942	Heterogeneous nuclear ribonucleoprotein H3	grey	0.446073	0.345108	0.498155	0.621972	0.665023	0.569242	NA	NA	NA	NA	NA
HNRNPH1	P31943	Heterogeneous nuclear ribonucleoprotein H	grey	0.404429	0.396614	0.405521	0.496687	0.521893	0.522957	NA	NA	NA	NA	NA
MCM4	P33991	DNA replication licensing factor MCM4	grey	NA	0.59894	0.687293	NA	0.474206	0.490345	NA	NA	NA	NA	NA
MCM7	P33993	DNA replication licensing factor MCM7	grey	NA	0.572883	0.609297	0.542101	0.497526	0.50492	NA	NA	NA	NA	NA
HSPA4	P34932	Heat shock 70 kDa protein 4	grey	0.676493	0.672043	0.707863	0.331154	0.357312	0.313312	NA	NA	NA	NA	NA
PHB	P35232	Prohibitin	grey	NA	0.673221	0.595262	0.253058	0.315396	0.294195	NA	NA	NA	NA	NA
RFC1	P35251	Replication factor C subunit 1	grey	0.790953	0.650763	0.707919	0.537844	0.541652	0.553374	NA	NA	NA	NA	NA
MYH9	P35579	Myosin-9	grey	0.464818	0.527032	0.525688	0.280734	0.344683	0.340476	NA	NA	NA	NA	NA
MYH10	P35580	Myosin-10	grey	0.474414	0.503452	0.473255	0.317171	0.324661	0.341301	NA	NA	NA	NA	NA
COPB2	P35606	Coatomer subunit beta'	grey	0.473684	0.589383	0.620427	0.374921	0.389505	0.39383	NA	NA	NA	NA	NA
NUP214	P35658	Nuclear pore complex protein Nup214	grey	NA	0.41445	0.424496	NA	0.340263	0.337718	NA	NA	NA	NA	NA
PSMC2	P35998	26S protease regulatory subunit 7	grey	0.5579	0.528086	0.609297	0.340278	0.364122	0.382036	NA	NA	NA	NA	NA
ATP5C1	P36542	ATP synthase subunit gamma, mitochondrial	grey	0.423664	0.442607	0.408387	0.320336	0.308009	0.29702	NA	NA	NA	NA	NA
RPL4	P36578	60S ribosomal protein L4	grey	0.342329	0.335865	0.389538	0.57586	0.580631	0.592985	NA	NA	NA	NA	NA
HSPA9	P38646	Stress-70 protein, mitochondrial	grey	0.282456	0.27054	0.282164	0.21364	0.202362	0.213487	NA	NA	NA	NA	NA
EIF4A3	P38919	Eukaryotic initiation factor 4A-III	grey	0.449348	0.419913	0.454984	0.563055	0.577389	0.599847	NA	NA	NA	NA	NA
RPL3	P39023	60S ribosomal protein L3	grey	0.346817	0.350101	0.38456	0.613075	0.641181	0.659574	NA	NA	NA	NA	NA
CCT6A	P40227	T-complex protein 1 subunit zeta	grey	0.547158	0.564197	0.590126	0.303959	0.32869	0.332606	NA	NA	NA	NA	NA
RPL13A	P40429	60S ribosomal protein L13a	grey	0.350528	0.361827	0.410691	0.589308	0.610102	0.610758	NA	NA	NA	NA	NA
MDH2	P40926	Malate dehydrogenase, mitochondrial	grey	0.603746	0.675871	0.737238	0.256049	0.329039	0.310065	NA	NA	NA	NA	NA
HADHA	P40939	Trifunctional enzyme subunit alpha, mitochondrial	grey	0.401408	0.457656	0.432393	0.233122	0.26077	0.293119	NA	NA	NA	NA	NA
GARS	P41250	Glycine--tRNA ligase	grey	NA	0.6714	0.682413	0.396438	0.47277	0.438083	NA	NA	NA	NA	NA
IARS	P41252	Isoleucine--tRNA ligase, cytoplasmic	grey	0.449984	0.488969	0.488375	0.315692	0.362104	0.362307	NA	NA	NA	NA	NA
TMPO	P42166	Lamina-associated polypeptide 2, isoform alpha	grey	0.649075	0.715679	0.80172	0.533482	0.542675	0.604791	NA	NA	NA	NA	NA
RPS27	P42677	40S ribosomal protein S27	grey	NA	0.411423	0.381004	0.341102	0.312002	NA	NA	NA	NA	NA	NA
HELZ	P42694	Probable helicase with zinc finger domain	grey	0.575913	0.521756	0.548148	0.605285	0.589273	0.640826	NA	NA	NA	NA	NA
LRPPRC	P42704	Leucine-rich PPR motif-containing protein, mitochondrial	grey	0.378925	0.37713	0.365959	0.242967	0.23737	0.264212	NA	NA	NA	NA	NA
MATR3	P43243	Matrin-3	grey	0.42402	0.439506	0.454143	0.436954	0.461984	0.483492	NA	NA	NA	NA	NA
VDAC2	P45880	Voltage-dependent anion-selective channel protein 2	grey	0.569324	0.626378	0.652275	0.316122	0.355593	0.341879	NA	NA	NA	NA	NA
NOP2	P46087	Probable 28S rRNA	grey	0.359363	0.331232	0.378651	0.614157	0.611192	0.601647	NA	NA	NA	NA	NA
RPL27A	P46776	60S ribosomal protein L27a	grey	0.412155	0.388548	0.441506	0.446779	0.513455	0.485575	NA	NA	NA	NA	NA
RPL5	P46777	60S ribosomal protein L5	grey	0.331704	0.308655	0.399618	0.570884	0.595668	0.578086	NA	NA	NA	NA	NA
RPL28	P46779	60S ribosomal protein L28	grey	0.322633	0.374995	0.411924	0.497442	0.56078	0.517544	NA	NA	NA	NA	NA
RPS9	P46781	40S ribosomal protein S9	grey	0.402564	0.362615	0.419597	0.485738	0.461786	0.476912	NA	NA	NA	NA	NA
RPS5	P46782	40S ribosomal protein S5	grey	0.378843	0.391919	NA	0.547323	0.527783	NA	NA	NA	NA	NA	NA
MAP1B	P46821	Microtubule-associated protein 1B	grey	0.319545	0.329808	0.375671	0.269118	0.361203	0.285866	NA	NA	NA	NA	NA
RPL29	P47914	60S ribosomal protein L29	grey	0.318903	0.302367	0.546172	0.611452	0.609737	0.786552	NA	NA	NA	NA	NA
ARCN1	P48444	Coatomer subunit delta	grey	NA	0.587222	0.671355	0.355997	0.379519	0.45546	NA	NA	NA	NA	NA
CCT5	P48643	T-complex protein 1 subunit epsilon	grey	0.579458	0.569066	0.567307	0.275013	0.296787	0.304544	NA	NA	NA	NA	NA
FASN	P49327	Fatty acid synthase	grey	0.510564	0.545775	0.550231	0.337473	0.360806	0.376874	NA	NA	NA	NA	NA
CCT3	P49368	T-complex protein 1 subunit gamma	grey	0.64343	0.486634	0.591687	0.289039	0.318459	0.322692	NA	NA	NA	NA	NA
TUFM	P49411	Elongation factor Tu, mitochondrial	grey	0.461974	0.529157	0.489795	0.238802	0.268133	0.263554	NA	NA	NA	NA	NA
AARS	P49588	Alanine--tRNA ligase, cytoplasmic	grey	NA	0.697461	0.66485	0.307777	0.362453	0.385133	NA	NA	NA	NA	NA
MCM2	P49736	DNA replication licensing factor MCM2	grey	0.593642	0.605778	0.527541	0.488402	0.388733	NA	NA	NA	NA	NA	NA
RANBP2	P49792	E3 SUMO-protein ligase RanBP2	grey	0.290458	0.352583	0.624499	0.321999	0.3916	0.285955	NA	NA	NA	NA	NA
EMD	P50402	Emerin	grey	0.477779	0.484545	0.493319	0.432251	0.430785	0.434973	NA	NA	NA	NA	NA
RPL14	P50914	60S ribosomal protein L14	grey	0.339125	0.351045	0.36436	0.591039	0.655012	0.637155	NA	NA	NA	NA	NA
CCT8	P50990	T-complex protein 1 subunit theta	grey	0.635956	0.654219	0.703614	0.333597	0.334427	0.347934	NA	NA	NA	NA	NA
CCT4	P50991	T-complex protein 1 subunit delta	grey	0.573387	0.6236	0.634319	0.322212	0.335478	0.351934	NA	NA	NA	NA	NA
HNRNPA3	P51991	Heterogeneous nuclear ribonucleoprotein A3	grey	0.485977	0.465472	0.584047	0.505891	0.54193	0.543139	NA	NA	NA	NA	NA
HNRNPM	P52272	Heterogeneous nuclear ribonucleoprotein M	grey	0.480268	0.488846	0.55704	0.565391	0.598595	0.629357	NA	NA	NA	NA	NA
KPNA1	P52294	Importin subunit alpha-5	grey	NA	0.661491	0.656934	NA	0.6021	0.665493	NA	NA	NA	NA	NA
HNRNPF	P52597	Heterogeneous nuclear ribonucleoprotein F	grey	0.367723	0.374646	0.382355	0.481343	0.524735	0.519733	NA	NA	NA	NA	NA
MSH6	P52701	DNA mismatch repair protein Msh6	grey	0.374244	0.364887	0.366483	0.303026	0.329424	0.345852	NA	NA	NA	NA	NA
SLC25A1	P53007	Tricarboxylate transport protein, mitochondrial	grey	0.228032	0.368787	0.371203	0.238626	0.275226	0.317026	NA	NA	NA	NA	NA
PPP5C	P53041	Serine/threonine-protein phosphatase 5	grey	0.505595	NA	0.456463	0.272853	0.278248	0.224595	NA	NA	NA	NA	NA
ACLY	P53396	ATP-citrate synthase	grey	0.627884	0.60927	0.598463	0.316815	0.305532	0.338495	NA	NA	NA	NA	NA
COPB1	P53618	Coatomer subunit beta	grey	0.513998	0.538614	0.559706	0.349214	0.364384	0.385794	NA	NA	NA	NA	NA
COPA	P53621	Coatomer subunit alpha	grey	0.529892	0.563758	0.602381	0.351604	0.403982	0.41559	NA	NA	NA	NA	NA
SLC16A1	P53985	Monocarboxylate transporter 1	grey	NA	0.367182	0.352722	NA	0.254882	0.298079	NA	NA	NA	NA	NA
RARS	P54136	Arginine--tRNA ligase, cytoplasmic	grey	0.553336	0.556697	0.565664	0.345524	0.389975	0.40195	NA	NA	NA	NA	NA
ALDH18A1	P54886	Delta-1-pyrroline-5-carboxylate synthase	grey	NA	0.505136	0.535788	0.339453	0.350326	0.316582	NA	NA	NA	NA	NA
CSE1L	P55060	Exportin-2	grey	0.429473	0.449713	0.564378	0.299108	0.562262	0.358501	NA	NA	NA	NA	NA
VCP	P55072	Transitional endoplasmic reticulum ATPase	grey	0.758766	0.722547	0.789923	0.371984	0.415726	0.464595	NA	NA	NA	NA	NA
ADAR	P55265	Double-stranded RNA-specific adenosine deaminase	grey	0.402514	0.424586	0.454188	0.336784	0.442196	0.486899	NA	NA	NA	NA	NA
NPEPPSL1, NPEPPS	A6NEC2, P55786	Puromycin-sensitive aminopeptidase-like protein, Puromycin-sensitive aminopeptidase	grey	NA	0.546369	0.619617	0.340732	0.350229	0.355601	NA	NA	NA	NA	NA
HNRNPH2	P55795	Heterogeneous nuclear ribonucleoprotein H2	grey	0.419921	0.439923	0.482219	0.59034	0.559971	0.58316	NA	NA	NA	NA	NA
EIF3B	P55884	Eukaryotic translation initiation factor 3 subunit B	grey	0.527269	0.58665	0.5401	0.361533	0.401956	0.410277	NA	NA	NA	NA	NA
MARS	P56192	Methionine--tRNA ligase, cytoplasmic	grey	0.544576	0.522549	0.564746	0.333472	0.348838	0.405533	NA	NA	NA	NA	NA
EIF6	P56537	Eukaryotic translation initiation factor 6	grey	NA	0.480553	0.610842	0.378143	0.649407	NA	NA	NA	NA	NA	NA
GEMIN4	P57678	Gem-associated protein 4	grey	NA	0.400091	0.392605	NA	0.374891	0.363738	NA	NA	NA	NA	NA
NUP107	P57740	Nuclear pore complex protein Nup107	grey	NA	0.319691	0.433413	NA	0.279662	0.221201	NA	NA	NA	NA	NA
TPI1	P60174	Triosephosphate isomerase	grey	0.70573	0.635406	NA	0.417334	0.408065	NA	NA	NA	NA	NA	NA
ACTB	P60709	Actin, cytoplasmic 1	grey	0.635902	0.640093	0.650718	0.321694	0.347201	0.350141	NA	NA	NA	NA	NA
EIF4A1	P60842	Eukaryotic initiation factor 4A-I	grey	0.776493	0.765181	0.797382	0.547039	0.530476	0.544041	NA	NA	NA	NA	NA
ACTR3, ACTR3B	P61158, Q9P1U1	Actin-related protein 3, Actin-related protein 3B	grey	NA	0.677947	0.657622	0.330215	0.377641	0.394752	NA	NA	NA	NA	NA
RPS3A	P61247	40S ribosomal protein S3a	grey	NA	0.492251	0.550913	0.467451	0.491778	0.469666	NA	NA	NA	NA	NA
RPL15	P61313	60S ribosomal protein L15	grey	0.355508	0.332497	0.404336	0.591266	0.610381	0.634325	NA	NA	NA	NA	NA
RPL27	P61353	60S ribosomal protein L27	grey	0.324365	0.32677	0.37021	0.588314	0.590524	0.697315	NA	NA	NA	NA	NA
HNRNPK	P61978	Heterogeneous nuclear ribonucleoprotein K	grey	0.537218	0.54478	0.573434	0.488954	0.511284	0.501157	NA	NA	NA	NA	NA
PSMC1	P62191	26S protease regulatory subunit 4	grey	NA	0.501372	0.594394	NA	0.392989	0.413932	NA	NA	NA	NA	NA
PSMC5	P62195	26S protease regulatory subunit 8	grey	0.603778	0.558203	0.611723	NA	0.403985	0.392531	NA	NA	NA	NA	NA
RPS8	P62241	40S ribosomal protein S8	grey	0.383306	0.355341	0.407809	0.593963	0.613208	0.645958	NA	NA	NA	NA	NA
RPS16	P62249	40S ribosomal protein S16	grey	0.429212	0.512148	0.614436	0.447227	0.496033	0.568317	NA	NA	NA	NA	NA
YWHAE	P62258	14-3-3 protein epsilon	grey	0.475939	0.513705	0.537064	0.32793	0.42649	0.4248	NA	NA	NA	NA	NA
RPS14	P62263	40S ribosomal protein S14	grey	NA	0.342862	0.404512	0.335753	0.367549	0.353857	NA	NA	NA	NA	NA
RPS23	P62266	40S ribosomal protein S23	grey	NA	0.421972	0.44765	NA	0.400265	0.383941	NA	NA	NA	NA	NA
RPS18	P62269	40S ribosomal protein S18	grey	0.400389	0.491478	0.578281	0.389576	0.519996	0.441716	NA	NA	NA	NA	NA
RPS13	P62277	40S ribosomal protein S13	grey	NA	0.473021	0.509996	NA	0.47533	0.470719	NA	NA	NA	NA	NA
RPS11	P62280	40S ribosomal protein S11	grey	NA	0.43416	0.436818	0.370465	0.364221	0.3547	NA	NA	NA	NA	NA
RPL7A	P62424	60S ribosomal protein L7a	grey	0.329432	0.321841	0.375764	0.591536	0.610418	0.630526	NA	NA	NA	NA	NA
RPS4X	P62701	40S ribosomal protein S4, X isoform	grey	0.46748	0.538798	0.575156	0.277656	0.426161	0.43132	NA	NA	NA	NA	NA
RPS6	P62753	40S ribosomal protein S6	grey	0.384866	0.488366	0.453509	0.494451	0.5331	0.581083	NA	NA	NA	NA	NA
HIST1H4A	P62805	Histone H4	grey	0.602943	0.597596	0.678845	0.680612	0.683005	0.748013	NA	NA	NA	NA	NA
RAN	P62826	GTP-binding nuclear protein Ran	grey	0.607854	0.650543	0.694407	0.375951	0.421416	0.392316	NA	NA	NA	NA	NA
RPL23	P62829	60S ribosomal protein L23	grey	0.34239	0.380107	0.369401	0.295153	0.332575	0.34677	NA	NA	NA	NA	NA
RPL30	P62888	60S ribosomal protein L30	grey	0.355243	0.337682	0.367052	0.623845	0.651921	0.656858	NA	NA	NA	NA	NA
RPL10A	P62906	60S ribosomal protein L10a	grey	0.341807	0.335582	0.377902	0.586646	0.61688	0.638625	NA	NA	NA	NA	NA
RPL32	P62910	60S ribosomal protein L32	grey	0.292463	0.33482	NA	0.59633	0.620382	NA	NA	NA	NA	NA	NA
RPL11	P62913	60S ribosomal protein L11	grey	0.333548	0.352873	0.412324	0.566217	0.613602	0.609838	NA	NA	NA	NA	NA
RPL8	P62917	60S ribosomal protein L8	grey	0.356616	0.319285	0.384812	0.614333	0.629294	0.662896	NA	NA	NA	NA	NA
TRA2B	P62995	Transformer-2 protein homolog beta	grey	0.223245	0.199148	0.199468	0.483633	0.542017	0.537284	NA	NA	NA	NA	NA
YWHAZ	P63104	14-3-3 protein zeta/delta	grey	0.510003	0.531219	0.566874	0.352319	0.40828	0.411016	NA	NA	NA	NA	NA
PPP2R2A, PPP2R2D	P63151, Q66LE6	Serine/threonine-protein phosphatase 2A 55 kDa regulatory subunit B alpha isoform, Serine/threonine-protein phosphatase 2A 55 kDa regulatory subunit B delta isoform	grey	NA	0.5573	0.641287	0.484641	0.354055	0.308414	NA	NA	NA	NA	NA
RACK1	P63244	Receptor of activated protein C kinase 1	grey	0.650068	0.683551	0.740905	0.413186	0.420922	0.408101	NA	NA	NA	NA	NA
YBX1	P67809	Nuclease-sensitive element-binding protein 1	grey	0.341219	0.310639	0.325997	0.569521	0.551565	0.570093	NA	NA	NA	NA	NA
EEF1A1, EEF1A1P5	P68104, Q5VTE0	Elongation factor 1-alpha 1, Putative elongation factor 1-alpha-like 3	grey	0.6447	0.60328	0.630077	0.449716	0.460673	0.474713	NA	NA	NA	NA	NA
TUBA1B	P68363	Tubulin alpha-1B chain	grey	0.480739	0.473588	0.472681	0.307004	0.341416	0.34426	NA	NA	NA	NA	NA
GTF2I	P78347	General transcription factor II-I	grey	0.320182	0.339034	0.360997	0.285205	0.294524	0.28949	NA	NA	NA	NA	NA
CCT2	P78371	T-complex protein 1 subunit beta	grey	0.598239	0.62539	0.616732	0.305347	0.361278	0.360279	NA	NA	NA	NA	NA
PRKDC	P78527	DNA-dependent protein kinase catalytic subunit	grey	0.35499	0.365663	0.364189	0.313907	0.323227	0.340818	NA	NA	NA	NA	NA
MRPS9	P82933	28S ribosomal protein S9, mitochondrial	grey	0.447793	0.440755	0.460378	0.460973	0.434726	0.393622	NA	NA	NA	NA	NA
RPL24	P83731	60S ribosomal protein L24	grey	0.379994	0.414038	0.440946	0.337636	0.367898	0.360995	NA	NA	NA	NA	NA
ERH	P84090	Enhancer of rudimentary homolog	grey	0.190274	0.118674	NA	0.281159	0.239704	NA	NA	NA	NA	NA	NA
RPL19	P84098	60S ribosomal protein L19	grey	0.37304	0.382096	0.422037	0.607225	0.657662	0.655724	NA	NA	NA	NA	NA
SRSF3	P84103	Serine/arginine-rich splicing factor 3	grey	0.287943	0.165571	NA	0.464115	0.397401	NA	NA	NA	NA	NA	NA
SLC25A3	Q00325	Phosphate carrier protein, mitochondrial	grey	0.364766	0.364644	0.379924	0.346128	0.338549	0.352449	NA	NA	NA	NA	NA
CLTC	Q00610	Clathrin heavy chain 1	grey	0.496915	0.543981	0.546668	0.320672	0.377442	0.357877	NA	NA	NA	NA	NA

## Sheet: Exchange
Genes	Uniprot	Protein	Color	0_point	30_seconds	5_minutes	30_minutes
UPF1	Q92900	Regulator of nonsense transcripts 1	pink	0.913882	0.877758	0.812502	0.584666
MOV10	Q9HCE1	Putative helicase MOV-10	pink	0.902127	0.927273	0.794615	0.573997
TUBB	P07437	Tubulin beta chain	pink	0.865599	0.846137	0.784673	0.504754
HSP90AA1	P07900	Heat shock protein HSP 90-alpha	pink	0.73429	0.683684	0.535618	0.442642
TUBB4B	P68371	Tubulin beta-4B chain	pink	0.905439	0.871847	0.752683	0.534949
LARP7	Q4G0J3	La-related protein 7	orange	0.86093	0.811722	0.643112	0.399186
MEPCE	Q7L2J0	7SK snRNA methylphosphate capping enzyme	orange	0.988806	0.972663	0.707354	0.381601
HSP90AB1	P08238	Heat shock protein HSP 90-beta	orange	0.829054	0.801894	0.683163	0.371599
PARP1	P09874	Poly [ADP-ribose] polymerase 1	orange	0.892082	0.806868	0.558499	0.239422
HSPA1A, HSPA1B	P0DMV8, P0DMV9	Heat shock 70 kDa protein 1A, Heat shock 70 kDa protein 1B	orange	0.915917	0.855211	0.657358	0.363592
HSPA8	P11142	Heat shock cognate 71 kDa protein	orange	0.9117	0.856988	0.661315	0.37666
UBB, UBC, RPS27A, UBA52	P0CG47, P0CG48, P62979, P62987	Polyubiquitin-B [Cleaved into: Ubiquitin], Polyubiquitin-C [Cleaved into: Ubiquitin], Ubiquitin-40S ribosomal protein S27a, Ubiquitin-60S ribosomal protein L40	orange	0.928042	0.843452	0.639938	0.428813
PABPC4	Q13310	Polyadenylate-binding protein 4	blue	0.912725	0.886628	0.839081	0.725192
ZCCHC3	Q9NUD5	Zinc finger CCHC domain-containing protein 3	blue	0.858901	0.873868	0.814602	0.720834
PABPC1	P11940	Polyadenylate-binding protein 1	blue	0.914785	0.892179	0.856146	0.714229
L1RE (ORF1)	Q9UN81	LINE-1 retrotransposable element ORF1 protein	blue	0.914369	0.953432	0.897591	0.802258
ORF2	O00370		blue	0.910048	0.910595	0.907781	0.907515
HNRNPU	Q00839	Heterogeneous nuclear ribonucleoprotein U	grey	0.916819	0.748933	0.544875	0.27162
SRSF2	Q01130	Serine/arginine-rich splicing factor 2	grey	0.883096	0.643519	0.321252	0.106257
OTUD4	Q01804	OTU domain-containing protein 4	grey	0.845969	0.621313	0.399565	0.237596
RPL18A	Q02543	60S ribosomal protein L18a	grey	0.958003	0.772189	0.633108	0.415605
RPL6	Q02878	60S ribosomal protein L6	grey	0.911127	0.781707	0.625398	0.399309
FMR1	Q06787	Synaptic functional regulator FMR1	grey	0.973431	0.834303	0.492844	0.175937
PRDX1	Q06830	Peroxiredoxin-1	grey	0.721363	0.731176	0.471355	0.252185
RPL18	Q07020	60S ribosomal protein L18	grey	0.940635	0.92196	0.772225	0.513169
SRSF1	Q07955	Serine/arginine-rich splicing factor 1	grey	0.976258	0.670109	0.294886	0.0807336
SRSF4	Q08170	Serine/arginine-rich splicing factor 4	grey	0.895744	0.770611	0.450005	0.178989
DHX9	Q08211	ATP-dependent RNA helicase A	grey	0.905275	0.836412	0.66906	0.370186
NCBP1	Q09161	Nuclear cap-binding protein subunit 1	grey	0.917783	0.881453	0.771794	0.562229
SF3A3	Q12874	Splicing factor 3A subunit 3	grey	0.879367	0.870889	0.798841	0.510907
ILF3	Q12906	Interleukin enhancer-binding factor 3	grey	0.561461	0.754619	0.511552	0.313814
ELAVL4, ELAVL2	P26378, Q12926	ELAV-like protein 4, ELAV-like protein 2	grey	0.73292	0.793525	0.759355	0.395149
IK	Q13123	Protein Red	grey	0.919185	0.824872	0.768674	0.464109
SRSF9	Q13242	Serine/arginine-rich splicing factor 9	grey	0.974845	0.665216	0.299985	0.0759461
SRSF5	Q13243	Serine/arginine-rich splicing factor 5	grey	0.816598	0.697995	0.607782	0.425763
SRSF6	Q13247	Serine/arginine-rich splicing factor 6	grey	0.910802	0.713352	0.388619	0.123215
PPIG	Q13427	Peptidyl-prolyl cis-trans isomerase G	grey	0.903737	0.678808	0.383329	0.140798
DDX39A	O00148	ATP-dependent RNA helicase DDX39A	grey	0.967574	0.846699	0.72046	0.432009
SF3B2	Q13435	Splicing factor 3B subunit 2	grey	0.889087	0.886644	0.775553	0.550481
SNW1	Q13573	SNW domain-containing protein 1	grey	0.854696	0.845945	0.740624	0.504509
TRA2A	Q13595	Transformer-2 protein homolog alpha	grey	0.976647	0.866699	0.636324	0.320103
DDX39B	Q13838	Spliceosome RNA helicase DDX39B	grey	0.911863	0.860839	0.731342	0.453621
HNRNPD	Q14103	Heterogeneous nuclear ribonucleoprotein D0	grey	0.890641	0.674479	0.377808	0.149942
SAFB2	Q14151	Scaffold attachment factor B2	grey	0.905918	0.651689	0.401803	0.207155
RBM39	Q14498	RNA-binding protein 39	grey	0.911087	0.809893	0.617122	0.361312
EFTUD2	Q15029	116 kDa U5 small nuclear ribonucleoprotein component	grey	0.916535	0.869953	0.777114	0.54959
RRS1	Q15050	Ribosome biogenesis regulatory protein homolog	grey	0.824423	0.812986	0.677607	0.412897
STK38	Q15208	Serine/threonine-protein kinase 38	grey	0.912709	0.839047	0.485199	0.19323
PWP2	Q15269	Periodic tryptophan protein 2 homolog	grey	0.409395	0.0966168	0.367097	0.253559
RNPS1	Q15287	RNA-binding protein with serine-rich domain 1	grey	0.912869	0.747175	0.476111	0.184884
PCBP1	Q15365	Poly(rC)-binding protein 1	grey	0.845038	0.867889	0.690019	0.383777
PCBP2	Q15366	Poly(rC)-binding protein 2	grey	0.919537	0.81208	0.605663	0.340156
SF3B3	Q15393	Splicing factor 3B subunit 3	grey	0.922607	0.926756	0.797796	0.580326
SAFB	Q15424	Scaffold attachment factor B1	grey	0.92475	0.613586	0.372053	0.213589
SF3A2	Q15428	Splicing factor 3A subunit 2	grey	0.853454	0.848257	0.774861	0.599198
SF3A1	Q15459	Splicing factor 3A subunit 1	grey	0.927541	0.932024	0.795401	0.538085
ELAVL1	Q15717	ELAV-like protein 1	grey	0.909297	0.746405	0.476017	0.161918
SRSF7	Q16629	Serine/arginine-rich splicing factor 7	grey	0.977478	0.787406	0.412373	0.103854
PFKFB3	Q16875	6-phosphofructo-2-kinase/fructose-2,6-bisphosphatase 3	grey	0.589575	0.695391	0.516978	0.179326
HNRNPUL2-BSCL2, HNRNPUL2	H3BQZ7, Q1KMD3	HCG2044799, Heterogeneous nuclear ribonucleoprotein U-like protein 2	grey	0.891185	0.581397	0.237636	0.105049
SMU1	Q2TAY7	WD40 repeat-containing protein SMU1	grey	0.99316	0.88798	0.767507	0.545455
NCBP3	Q53F19	Nuclear cap-binding protein subunit 3	grey	0.91296	0.853153	0.713639	0.437678
ZNF326	Q5BKZ1	DBIRD complex subunit ZNF326	grey	0.829825	0.697282	0.478977	0.258402
IGF2BP3	O00425	Insulin-like growth factor 2 mRNA-binding protein 3	grey	0.916569	0.856768	0.734438	0.504705
PRPF8	Q6P2Q9	Pre-mRNA-processing-splicing factor 8	grey	0.923635	0.888189	0.787609	0.558284
PES1	O00541	Pescadillo homolog	grey	0.970329	0.864912	0.642793	0.384274
ZC3H14	Q6PJT7	Zinc finger CCCH domain-containing protein 14	grey	0.879844	0.798012	0.575155	0.255049
LARP1	Q6PKG0	La-related protein 1	grey	0.880386	0.834182	0.709125	0.387202
HIST3H3, H3F3C, HIST2H3A;	Q16695, Q6NXT2, Q71DI3	Histone H3.1t, Histone H3.3C, Histone H3.2	grey	0.958693	0.862361	0.727654	0.477526
DHX30	Q7L2E3	Putative ATP-dependent RNA helicase DHX30	grey	0.885845	0.635913	0.64105	0.287379
NOP56	O00567	Nucleolar protein 56	grey	0.880802	0.860883	0.688474	0.398098
HDX	Q7Z353	Highly divergent homeobox	grey	0.927389	0.840815	0.587765	0.290111
DDX3X	O00571	ATP-dependent RNA helicase DDX3X	grey	0.942459	0.813527	0.521485	0.18316
PABPN1	Q86U42	Polyadenylate-binding protein 2	grey	0.890129	0.558323	0.115412	0.0220384
ALYREF	Q86V81	THO complex subunit 4	grey	0.975399	0.611862	0.240422	0.0548329
RBM12B	Q8IXT5	RNA-binding protein 12B	grey	0.906766	0.875534	0.622898	0.319014
KRI1	Q8N9T8	Protein KRI1 homolog	grey	0.45267	0.851328	0.68998	0.231951
PRPF38A	Q8NAV1	Pre-mRNA-splicing factor 38A	grey	0.918923	0.890539	0.74916	0.613855
PPHLN1	Q8NEY8	Periphilin-1	grey	0.906328	0.775291	0.562402	0.281609
WDR36	Q8NI36	WD repeat-containing protein 36	grey	0.345057	0.864453	0.67769	0.412041
BRIX1	Q8TDN6	Ribosome biogenesis protein BRX1 homolog	grey	0.913562	0.818132	0.73621	0.464312
CHD1	O14646	Chromodomain-helicase-DNA-binding protein 1	grey	0.861098	0.520499	0.274137	0.117598
PRMT5	O14744	Protein arginine N-methyltransferase 5	grey	0.908587	0.777005	0.550279	0.257174
DDX17	Q92841	Probable ATP-dependent RNA helicase DDX17	grey	0.883917	0.841156	0.56446	0.217025
SNRNP40	Q96DI7	U5 small nuclear ribonucleoprotein 40 kDa protein	grey	0.93102	0.926319	0.787361	0.54246
RBMXL1	Q96E39	RNA binding motif protein, X-linked-like-1	grey	0.893808	0.463116	0.222582	0.165464
PGAM5	Q96HS1	Serine/threonine-protein phosphatase PGAM5, mitochondrial	grey	0.877102	0.845983	0.611666	0.329233
YTHDC1	Q96MU7	YTH domain-containing protein 1	grey	0.876838	0.718088	0.418885	0.18384
RBM14	Q96PK6	RNA-binding protein 14	grey	0.622969	0.688386	0.467918	0.242172
FYTTD1	Q96QD9	UAP56-interacting factor	grey	0.916757	0.858311	0.713163	0.402853
SPEN	Q96T58	Msx2-interacting protein	grey	0.934473	0.816227	0.617649	0.198217
CDC5L	Q99459	Cell division cycle 5-like protein	grey	0.886732	0.863721	0.743682	0.470594
HNRNPAB	Q99729	Heterogeneous nuclear ribonucleoprotein A/B	grey	0.88333	0.611952	0.285903	0.0953419
PRMT1	Q99873	Protein arginine N-methyltransferase 1	grey	0.904564	0.727015	0.44956	0.176975
WDR77	Q9BQA1	Methylosome protein 50	grey	0.950473	0.849834	0.582184	0.290926
MMTAG2	Q9BU76	Multiple myeloma tumor-associated protein 2	grey	0.873474	0.774998	0.543733	0.292956
HNRNPUL1	Q9BUJ2	Heterogeneous nuclear ribonucleoprotein U-like protein 1	grey	0.881968	0.861521	0.708803	0.392574
U2SURP	O15042	U2 snRNP-associated SURP motif-containing protein	grey	0.58342	0.738712	0.50544	0.295948
GNL3	Q9BVP2	Guanine nucleotide-binding protein-like 3	grey	0.674786	0.712139	0.556875	0.249582
GTPBP4	Q9BZE4	Nucleolar GTP-binding protein 1	grey	0.511504	0.801193	0.748352	0.379803
CRNKL1	Q9BZJ0	Crooked neck-like protein 1	grey	0.896833	0.840797	0.755824	0.488198
MKRN2	Q9H000	Probable E3 ubiquitin-protein ligase makorin-2	grey	0.918461	0.751374	0.455797	0.265705
NAT10	Q9H0A0	RNA cytidine acetyltransferase	grey	0.859879	0.768626	0.775311	0.496336
PNN	Q9H307	Pinin	grey	0.910418	0.825526	0.566912	0.227005
SCAF1	Q9H7N4	Splicing factor, arginine/serine-rich 19	grey	0.96649	0.863349	0.618437	0.278124
NOL11	Q9H8H0	Nucleolar protein 11	grey	0.755907	0.734276	0.635449	0.369598
CLK4	Q9HAZ1	Dual specificity protein kinase CLK4	grey	0.897383	0.526582	0.249401	0.13747
NCOA5	Q9HCD5	Nuclear receptor coactivator 5	grey	0.864633	0.744742	0.418581	0.138005
CWC22	Q9HCG8	Pre-mRNA-splicing factor CWC22 homolog	grey	0.800662	0.900874	0.820318	0.577881
XAB2	Q9HCS7	Pre-mRNA-splicing factor SYF1	grey	0.924368	0.88009	0.775235	0.524511
WDR6	Q9NNW5	WD repeat-containing protein 6	grey	0.831856	0.82534	0.676218	0.521187
DDX21	Q9NR30	Nucleolar RNA helicase 2	grey	0.881643	0.813245	0.641397	0.321321
RBM22	Q9NW64	Pre-mRNA-splicing factor RBM22	grey	0.936241	0.87746	0.794699	0.561961
SLTM	Q9NWH9	SAFB-like transcription modulator	grey	0.853976	0.684632	0.414122	0.209699
BCLAF1	Q9NYF8	Bcl-2-associated transcription factor 1	grey	0.914449	0.808363	0.440853	0.134364
IGF2BP1	Q9NZI8	Insulin-like growth factor 2 mRNA-binding protein 1	grey	0.92054	0.860538	0.718413	0.466539
PHRF1	Q9P1Y6	PHD and RING finger domain-containing protein 1	grey	0.948972	0.798777	0.495049	0.167548
DHX15	O43143	Pre-mRNA-splicing factor ATP-dependent RNA helicase DHX15	grey	0.867527	0.798521	0.610136	0.301822
DDX41	Q9UJV9	Probable ATP-dependent RNA helicase DDX41	grey	0.732728	0.696951	0.697208	0.390415
RALY	Q9UKM9	RNA-binding protein Raly	grey	0.951378	0.906538	0.730908	0.483033
ACIN1	Q9UKV3	Apoptotic chromatin condensation inducer in the nucleus	grey	0.97718	0.658831	0.315378	0.0926825
PRPF19	Q9UMS4	Pre-mRNA-processing factor 19	grey	0.913345	0.900938	0.790896	0.516301
SRRM2	Q9UQ35	Serine/arginine repetitive matrix protein 2	grey	0.73942	0.856281	0.634195	0.29077
STK38L	Q9Y2H1	Serine/threonine-protein kinase 38-like	grey	0.881183	0.656617	0.221354	0.176663
THRAP3	Q9Y2W1	Thyroid hormone receptor-associated protein 3	grey	0.976099	0.828332	0.449482	0.13674
NOP58	Q9Y2X3	Nucleolar protein 58	grey	0.918434	0.853177	0.674754	0.37956
RPL36	Q9Y3U8	60S ribosomal protein L36	grey	0.912679	0.85896	0.770215	0.439685
CCDC9	Q9Y3X0	Coiled-coil domain-containing protein 9	grey	0.908369	0.820451	0.571018	0.18723
CHTOP	Q9Y3Y2	Chromatin target of PRMT1 protein	grey	0.907304	0.842661	0.636813	0.260645
HNRNPR	O43390	Heterogeneous nuclear ribonucleoprotein R	grey	0.880722	0.673832	0.392625	0.187368
RBM8A	Q9Y5S9	RNA-binding protein 8A	grey	0.94101	0.902785	0.746489	0.508889
IGF2BP2	Q9Y6M1	Insulin-like growth factor 2 mRNA-binding protein 2	grey	0.383606	0.811743	0.773602	0.505758
PLRG1	O43660	Pleiotropic regulator 1	grey	0.88717	0.866995	0.739448	0.494032
RRP9	O43818	U3 small nucleolar RNA-interacting protein 2	grey	0.767263	0.741542	0.807544	0.433851
AQR	O60306	Intron-binding protein aquarius	grey	0.879992	0.90181	0.796855	0.496288
CDC40	O60508	Pre-mRNA-processing factor 17	grey	0.920395	0.879987	0.758296	0.499394
HIST1H2BK, H2BFS, HIST1H2BD, HIST1H2BC, HIST2H2BF, HIST1H2BH, HIST1H2BA, HIST1H2BN, HIST1H2BM, HIST1H2BL	O60814, P57053, P58876, P62807, Q5QNW6, Q93079, Q96A08, Q99877, Q99879, Q99880	Histone H2B type 1-K, Histone H2B type F-S, Histone H2B type 1-D, Histone H2B type 1-C/E/F/G/I, Histone H2B type 2-F, Histone H2B type 1-H, Histone H2B type 1-A, Histone H2B type 1-N, Histone H2B type 1-M, Histone H2B type 1-L	grey	0.903379	0.835659	0.678911	0.379868
DKC1	O60832	H/ACA ribonucleoprotein complex subunit 4	grey	0.859938	0.795885	0.761051	0.395781
ZC3H11A	O75152	Zinc finger CCCH domain-containing protein 11A	grey	0.886005	0.754667	0.436518	0.128616
H2AFY	O75367	Core histone macro-H2A.1	grey	0.895234	0.8782	0.671161	0.463982
SRSF10	O75494	Serine/arginine-rich splicing factor 10	grey	0.976445	0.879992	0.656062	0.288307
SF3B1	O75533	Splicing factor 3B subunit 1	grey	0.909918	0.882853	0.7717	0.544295
SNRNP200	O75643	U5 small nuclear ribonucleoprotein 200 kDa helicase	grey	0.910603	0.886215	0.763582	0.553232
PRPF6	O94906	Pre-mRNA-processing factor 6	grey	0.830218	0.81179	0.691805	0.538426
GAPDH	P04406	Glyceraldehyde-3-phosphate dehydrogenase	grey	0.557444	0.584924	0.29509	0.150988
SLC25A5	P05141	ADP/ATP translocase 2	grey	0.902027	0.871619	0.695512	0.37299
RPLP0, RPLP0P6	P05388, Q8NHW5	60S acidic ribosomal protein P0, 60S acidic ribosomal protein P0-like	grey	0.910953	0.866273	0.751386	0.47533
HNRNPC	P07910	Heterogeneous nuclear ribonucleoproteins C1/C2	grey	0.921192	0.874729	0.729188	0.425125
SNRPB2	P08579	U2 small nuclear ribonucleoprotein B''	grey	0.904958	0.843891	0.743135	0.551127
SNRNP70	P08621	U1 small nuclear ribonucleoprotein 70 kDa	grey	0.998242	0.867938	0.638349	0.299003
VIM	P08670	Vimentin	grey	0.916646	0.840833	0.678446	0.397485
RPSA	P08865	40S ribosomal protein SA	grey	0.745832	0.898783	0.785739	0.481753
HNRNPA1, HNRNPA1L2	P09651, Q32P51	Heterogeneous nuclear ribonucleoprotein A1, Heterogeneous nuclear ribonucleoprotein A1-like 2	grey	0.690422	0.593298	0.337836	0.0920152
SNRPA1	P09661	U2 small nuclear ribonucleoprotein A'	grey	0.865492	0.890192	0.823664	0.591903
HIST1H2AG, HIST1H2AD, HIST1H2AH, HIST1H2AJ, H2AFJ	A0A0U1RRH7, P0C0S8, P20671, Q96KK5, Q99878, Q9BTM1	Histone H2A, Histone H2A type 1, Histone H2A type 1-D, Histone H2A type 1-H, Histone H2A type 1-J, Histone H2A.J	grey	0.941921	0.827634	0.661945	0.359352
HSPA5	P11021	78 kDa glucose-regulated protein	grey	0.810764	0.764855	0.544295	0.224241
XRCC6	P12956	X-ray repair cross-complementing protein 6	grey	0.821486	0.784506	0.682469	0.392599
XRCC5	P13010	X-ray repair cross-complementing protein 5	grey	0.907298	0.79846	0.737491	0.478784
EEF2	P13639	Elongation factor 2	grey	0.779648	0.776206	0.648617	0.31722
PKM	P14618	Pyruvate kinase PKM	grey	0.589996	0.630996	0.639132	0.290287
SNRPB, SNRPN	P14678, P63162	Small nuclear ribonucleoprotein-associated proteins B and B', Small nuclear ribonucleoprotein-associated protein N	grey	0.952541	0.909363	0.803153	0.527164
HNRNPL	P14866	Heterogeneous nuclear ribonucleoprotein L	grey	0.915355	0.759494	0.495141	0.207594
RPS2	P15880	40S ribosomal protein S2	grey	0.8814	0.837618	0.71285	0.462556
DDX5	P17844	Probable ATP-dependent RNA helicase DDX5	grey	0.88497	0.78458	0.601752	0.264814
RPL35A	P18077	60S ribosomal protein L35a	grey	0.885036	0.874287	0.744317	0.474619
RPL7	P18124	60S ribosomal protein L7	grey	0.919705	0.808803	0.655576	0.402136
SON	P18583	Protein SON	grey	0.896839	0.883487	0.683564	0.39611
RPL17-C18orf32, RPL17	A0A0A6YYL6, P18621	Protein RPL17-C18orf32, 60S ribosomal protein L17	grey	0.892117	0.82672	0.650948	0.363908
POLR2C	P19387	DNA-directed RNA polymerase II subunit RPB3	grey	0.886478	0.783184	0.479066	0.230343
TRIM21	P19474	E3 ubiquitin-protein ligase TRIM21	grey	0.855159	0.812418	0.540082	0.260421
CDK11B, CDK11A	P21127, Q9UQ88	Cyclin-dependent kinase 11B, Cyclin-dependent kinase 11A	grey	0.805326	0.880429	0.546094	0.22679
FBL	P22087	rRNA 2'-O-methyltransferase fibrillarin	grey	0.629684	0.829575	0.675672	0.39299
HNRNPA2B1	P22626	Heterogeneous nuclear ribonucleoproteins A2/B1	grey	0.907971	0.495719	0.222552	0.0679884
RPS3	P23396	40S ribosomal protein S3	grey	0.942522	0.827175	0.736842	0.473141
POLR2A	P24928	DNA-directed RNA polymerase II subunit RPB1	grey	0.906154	0.858291	0.599584	0.286855
RPL13	P26373	60S ribosomal protein L13	grey	0.936912	0.868197	0.702761	0.39169
PTBP1	P26599	Polypyrimidine tract-binding protein 1	grey	0.816339	0.679384	0.55514	0.241988
RPL10	P27635	60S ribosomal protein L10	grey	0.98627	0.815974	0.53678	0.26712
RPL12	P30050	60S ribosomal protein L12	grey	0.903707	0.877478	0.759059	0.4633
POLR2B	P30876	DNA-directed RNA polymerase II subunit RPB2	grey	0.912519	0.823315	0.623054	0.301476
HNRNPH3	P31942	Heterogeneous nuclear ribonucleoprotein H3	grey	0.822645	0.442207	0.148298	0.0792507
HNRNPH1	P31943	Heterogeneous nuclear ribonucleoprotein H	grey	0.9543	0.796052	0.550076	0.276526
KRT2	P35908	Keratin, type II cytoskeletal 2 epidermal	grey	0.0374824	0.0559545	0.0335587	0.0265186
RPL4	P36578	60S ribosomal protein L4	grey	0.908679	0.84793	0.745301	0.446676
RBMX	P38159	RNA-binding motif protein, X chromosome	grey	0.916583	0.192696	0.096625	0.0537346
HSPA9	P38646	Stress-70 protein, mitochondrial	grey	0.895873	0.459714	0.13994	0.0887536
EIF4A3	P38919	Eukaryotic initiation factor 4A-III	grey	0.915276	0.872864	0.748143	0.498168
RPL3	P39023	60S ribosomal protein L3	grey	0.92313	0.85277	0.7426	0.453922
RPL13A	P40429	60S ribosomal protein L13a	grey	0.917992	0.8484	0.741856	0.435577
MATR3	P43243	Matrin-3	grey	0.87858	0.854268	0.673917	0.382464
NOP2	P46087	Probable 28S rRNA	grey	0.759748	0.849755	0.727943	0.408512
RPL27A	P46776	60S ribosomal protein L27a	grey	0.985418	0.537636	0.334248	0.175435
RPL5	P46777	60S ribosomal protein L5	grey	0.879938	0.883701	0.759627	0.449618
RPL28	P46779	60S ribosomal protein L28	grey	0.776656	0.588968	0.563319	0.376695
RPS9	P46781	40S ribosomal protein S9	grey	0.921802	0.701537	0.509732	0.240941
RPS5	P46782	40S ribosomal protein S5	grey	0.882135	0.570981	0.813735	0.524263
RPL34	P49207	60S ribosomal protein L34	grey	0.894091	0.836657	0.721184	0.479885
CLK1	P49759	Dual specificity protein kinase CLK1	grey	0.908382	0.432791	0.202062	0.0913964
CLK2	P49760	Dual specificity protein kinase CLK2	grey	0.894497	0.687314	0.323254	0.117917
CLK3	P49761	Dual specificity protein kinase CLK3	grey	0.672614	0.683834	0.429705	0.159713
RPL14	P50914	60S ribosomal protein L14	grey	0.890025	0.888628	0.744716	0.477138
FXR1	P51114	Fragile X mental retardation syndrome-related protein 1	grey	0.888617	0.749474	0.427587	0.155163
FXR2	P51116	Fragile X mental retardation syndrome-related protein 2	grey	0.904876	0.813596	0.479126	0.197741
HNRNPM	P52272	Heterogeneous nuclear ribonucleoprotein M	grey	0.910129	0.890511	0.736537	0.445836
NCBP2	P52298	Nuclear cap-binding protein subunit 2	grey	0.908579	0.864333	0.77031	0.602117
HNRNPF	P52597	Heterogeneous nuclear ribonucleoprotein F	grey	0.914821	0.812818	0.647304	0.352998
MFAP1	P55081	Microfibrillar-associated protein 1	grey	0.732749	0.800188	0.737216	0.508937
HNRNPH2	P55795	Heterogeneous nuclear ribonucleoprotein H2	grey	0.930382	0.814513	0.562076	0.27563
ACTB	P60709	Actin, cytoplasmic 1	grey	0.875981	0.794222	0.611379	0.341759
RPL15	P61313	60S ribosomal protein L15	grey	0.947321	0.894886	0.714669	0.464708
MAGOH	P61326	Protein mago nashi homolog	grey	0.926068	0.860715	0.777109	0.532929
RPL27	P61353	60S ribosomal protein L27	grey	0.916262	0.883987	0.780118	0.518907
HNRNPK	P61978	Heterogeneous nuclear ribonucleoprotein K	grey	0.907959	0.765945	0.477463	0.180241
RPS8	P62241	40S ribosomal protein S8	grey	0.962256	0.281707	0.194685	0.105969
RPS15A	H3BN98, P62244	Uncharacterized protein, 40S ribosomal protein S15a	grey	0.813126	0.776915	0.541263	0.178975
RPS16	P62249	40S ribosomal protein S16	grey	0.907664	0.904597	0.748339	0.505073
RPS18	P62269	40S ribosomal protein S18	grey	0.871596	0.829039	0.756211	0.458306
RPS13	P62277	40S ribosomal protein S13	grey	0.886517	0.834347	0.638611	0.220394
RPS11	P62280	40S ribosomal protein S11	grey	0.916206	0.780162	0.615518	0.250279
SNRPE	P62304	Small nuclear ribonucleoprotein E	grey	0.967381	0.903899	0.796653	0.546382
SNRPD1	P62314	Small nuclear ribonucleoprotein Sm D1	grey	0.947257	0.898156	0.784297	0.545991
SNRPD2	P62316	Small nuclear ribonucleoprotein Sm D2	grey	0.964205	0.889541	0.788418	0.503919
SNRPD3	P62318	Small nuclear ribonucleoprotein Sm D3	grey	0.922559	0.867242	0.763286	0.525842
RPL7A	P62424	60S ribosomal protein L7a	grey	0.901521	0.851135	0.737891	0.462024
POLR2G	P62487	DNA-directed RNA polymerase II subunit RPB7	grey	0.877613	0.791053	0.619135	0.369121
RPS4X	P62701	40S ribosomal protein S4, X isoform	grey	0.851942	0.856119	0.71741	0.421725
RPS6	P62753	40S ribosomal protein S6	grey	0.95936	0.670673	0.471031	0.190415
HIST1H4A	P62805	Histone H4	grey	0.907744	0.830646	0.696123	0.473598
RPS25	P62851	40S ribosomal protein S25	grey	0.882343	0.86352	0.74851	0.455005
RPL30	P62888	60S ribosomal protein L30	grey	0.964496	0.901132	0.767339	0.460099
RPL10A	P62906	60S ribosomal protein L10a	grey	0.903562	0.861557	0.745599	0.461108
RPL11	P62913	60S ribosomal protein L11	grey	0.909658	0.853536	0.812979	0.464869
RPL8	P62917	60S ribosomal protein L8	grey	0.976436	0.936184	0.774118	0.47344
TRA2B	P62995	Transformer-2 protein homolog beta	grey	0.970709	0.788695	0.549082	0.263569
RACK1	P63244	Receptor of activated protein C kinase 1	grey	0.903175	0.843218	0.748845	0.43695
YBX1	P67809	Nuclease-sensitive element-binding protein 1	grey	0.964452	0.708489	0.417344	0.113475
EEF1A1, EEF1A1P5	P68104, Q5VTE0	Elongation factor 1-alpha 1, Putative elongation factor 1-alpha-like 3	grey	0.761034	0.747066	0.585028	0.248911
TUBA1B	P68363	Tubulin alpha-1B chain	grey	0.901976	0.873084	0.796276	0.577774
SARNP	H0YHG0, P82979	Uncharacterized protein, SAP domain-containing ribonucleoprotein	grey	0.918214	0.682872	0.329201	0.0456786
RPL24	P83731	60S ribosomal protein L24	grey	0.900168	0.764451	0.573433	0.376555
ERH	P84090	Enhancer of rudimentary homolog	grey	0.907874	0.78098	0.453334	0.151449
RPL19	P84098	60S ribosomal protein L19	grey	0.901442	0.404606	0.272262	0.139067
SRSF3	P84103	Serine/arginine-rich splicing factor 3	grey	0.918567	0.570981	0.218219	0.062553

## Sheet: Exchange distance matrix
Genes	ORF1	ORF2	TUBB	HSP90AA1	HSP90AB1	PARP1	HSPA1A, HSPA1B	HSPA8	PABPC1	UBB, UBC, RPS27A, UBA52	TUBB4B	PABPC4	LARP7	UPF1	MOV10	ZCCHC3	MEPCE
ORF1	0	0.00186121	0.00880018	0.0101326	0.0210608	0.0540654	0.0293623	0.0271429	0.000801614	0.0225383	0.00850003	0.000656022	0.0206635	0.00529562	0.00630723	0.000132068	0.0323044
ORF2	0.00186121	0	0.0179226	0.0180114	0.0343651	0.0731041	0.044098	0.04141	0.00413151	0.0347331	0.0172239	0.00352512	0.033247	0.0124555	0.0146433	0.00256337	0.0481456
TUBB	0.00880018	0.0179226	0	0.00394862	0.00294078	0.0221298	0.00766381	0.00665733	0.00491017	0.00609635	0.000670764	0.00580084	0.00398297	0.000609041	0.000769488	0.00724144	0.00954012
HSP90AA1	0.0101326	0.0180114	0.00394862	0	0.00607826	0.0199778	0.00717473	0.0061752	0.00640386	0.00305322	0.00137365	0.00640188	0.00348102	0.0028427	0.00243881	0.00804343	0.00897008
HSP90AB1	0.0210608	0.0343651	0.00294078	0.00607826	0	0.00936662	0.0015321	0.00122157	0.0148244	0.0024817	0.0031851	0.016057	0.000842964	0.00557087	0.0045635	0.0184553	0.00234176
PARP1	0.0540654	0.0731041	0.0221298	0.0199778	0.00936662	0	0.00386902	0.0047213	0.0438798	0.00749308	0.0200942	0.0452085	0.0080368	0.0270704	0.0243181	0.0494456	0.00323381
HSPA1A, HSPA1B	0.0293623	0.044098	0.00766381	0.00717473	0.0015321	0.00386902	0	4.55985e-05	0.0219332	0.00109925	0.00638553	0.0229686	0.000781058	0.0105551	0.00890089	0.0259974	0.000375967
HSPA8	0.0271429	0.04141	0.00665733	0.0061752	0.00122157	0.0047213	4.55985e-05	0	0.0200607	0.000829286	0.00538628	0.0210438	0.000456961	0.00929678	0.00769562	0.0239157	0.000485619
PABPC1	0.000801614	0.00413151	0.00491017	0.00640386	0.0148244	0.0438798	0.0219332	0.0200607	0	0.0161344	0.00468928	6.70394e-05	0.0145267	0.00225178	0.00355194	0.000347864	0.0250363
UBB, UBC, RPS27A, UBA52	0.0225383	0.0347331	0.00609635	0.00305322	0.0024817	0.00749308	0.00109925	0.000829286	0.0161344	0	0.00382515	0.0166779	0.00045827	0.00735925	0.00623466	0.0194289	0.00210304
TUBB4B	0.00850003	0.0172239	0.000670764	0.00137365	0.0031851	0.0200942	0.00638553	0.00538628	0.00468928	0.00382515	0	0.00521934	0.00273746	0.000618911	0.000462467	0.00672157	0.00815988
PABPC4	0.000656022	0.00352512	0.00580084	0.00640188	0.016057	0.0452085	0.0229686	0.0210438	6.70394e-05	0.0166779	0.00521934	0	0.0153363	0.00278593	0.00408824	0.000222275	0.0261269
LARP7	0.0206635	0.033247	0.00398297	0.00348102	0.000842964	0.0080368	0.000781058	0.000456961	0.0145267	0.00045827	0.00273746	0.0153363	0	0.00575097	0.0045673	0.0178293	0.00162673
UPF1	0.00529562	0.0124555	0.000609041	0.0028427	0.00557087	0.0270704	0.0105551	0.00929678	0.00225178	0.00735925	0.000618911	0.00278593	0.00575097	0	0.000563622	0.00397338	0.0128974
MOV10	0.00630723	0.0146433	0.000769488	0.00243881	0.0045635	0.0243181	0.00890089	0.00769562	0.00355194	0.00623466	0.000462467	0.00408824	0.0045673	0.000563622	0	0.00497221	0.0103385
ZCCHC3	0.000132068	0.00256337	0.00724144	0.00804343	0.0184553	0.0494456	0.0259974	0.0239157	0.000347864	0.0194289	0.00672157	0.000222275	0.0178293	0.00397338	0.00497221	0	0.0289286
MEPCE	0.0323044	0.0481456	0.00954012	0.00897008	0.00234176	0.00323381	0.000375967	0.000485619	0.0250363	0.00210304	0.00815988	0.0261269	0.00162673	0.0128974	0.0103385	0.0289286	0

## Sheet: Integration
Genes	Uniprot	Protein	Cluster	Color	Tandem_Exp1_affinity	Tandem_Exp2_affinity	RNAse_Exp1_affinity	RNAse_Exp2_affinity	RT_Exp1_affinity	RT_Exp2_affinity	RT_Exp3_affinity	EN_Exp1_affinity	EN_Exp2_affinity	EN_Exp3_affinity	Exchange_0_point	Exchange_30_seconds	Exchange_5_minutes	Exchange_30_minutes
PABPC4	Q13310	Polyadenylate-binding protein 4	1	orange	0.672753	0.783049	0.367473	0.582652	0.384888	0.388865	0.347582	0.59147	0.610395	0.603709	0.912725	0.886628	0.839081	0.725192
UPF1	Q92900	Regulator of nonsense transcripts 1	1	orange	0.438861	0.63515	0.521966	0.795634	0.459351	0.462131	0.412107	0.578326	0.581327	0.585492	0.913882	0.877758	0.812502	0.584666
MOV10	Q9HCE1	Putative helicase MOV-10	1	orange	NA	0.842801	0.63382	0.870489	0.341295	0.360573	0.31714	0.632245	0.683404	0.678756	0.902127	0.927273	0.794615	0.573997
ZCCHC3	Q9NUD5	Zinc finger CCHC domain-containing protein 3	1	orange	0.277879	0.469417	0.654863	0.810912	0.430547	0.389715	0.412142	0.651968	0.648802	0.636496	0.858901	0.873868	0.814602	0.720834
PABPC1	P11940	Polyadenylate-binding protein 1	1	orange	0.69804	0.781794	0.381678	0.578831	0.367145	0.363248	0.328837	0.586247	0.599247	0.594649	0.914785	0.892179	0.856146	0.714229
L1RE (ORF1)	Q9UN81	LINE-1 retrotransposable element ORF1 protein	1	orange	0.914442	0.979395	0.744415	0.845673	0.353771	0.34378	0.325632	0.630287	0.655541	0.656357	0.914369	0.953432	0.897591	0.802258
FKBP4	Q02790	Peptidyl-prolyl cis-trans isomerase FKBP4	2	lightblue	0.263693	0.286961	0.422999	0.5351	NA	0.488059	0.462522	0.287881	0.314895	0.277879	NA	NA	NA	NA
HAX1	O00165	HCLS1-associated protein X-1	2	lightblue	0.134349	0.173076	0.352629	0.543685	0.358571	0.367465	0.331162	0.31192	0.324484	0.317369	NA	NA	NA	NA
YME1L1	Q96TA2	ATP-dependent zinc metalloprotease YME1L1	2	lightblue	NA	NA	NA	NA	NA	0.360728	0.350181	0.426845	0.337116	0.342473	NA	NA	NA	NA
NAP1L4	Q99733	Nucleosome assembly protein 1-like 4	2	lightblue	NA	NA	NA	NA	0.46492	0.538639	0.569911	0.350384	0.379422	0.349788	NA	NA	NA	NA
IPO7	O95373	Importin-7	2	lightblue	0.191364	0.190625	0.383416	0.530434	0.50768	0.489947	0.457998	0.349475	0.383006	0.388667	NA	NA	NA	NA
TROVE2	P10155	60 kDa SS-A/Ro ribonucleoprotein	2	lightblue	NA	NA	NA	NA	0.466479	0.341603	0.369423	0.275142	0.490228	NA	NA	NA	NA	NA
DDX6	P26196	Probable ATP-dependent RNA helicase DDX6	2	lightblue	NA	NA	NA	NA	NA	0.600112	NA	0.523651	0.479131	0.455148	NA	NA	NA	0.283704
NAP1L1	P55209	Nucleosome assembly protein 1-like 1	2	lightblue	0.201794	0.247158	0.305512	0.60878	0.538639	0.55391	0.525008	0.344451	0.358925	0.35423	NA	NA	NA	NA
LARP7	Q4G0J3	La-related protein 7	3	green	NA	NA	NA	NA	NA	0.822572	NA	NA	NA	NA	0.86093	0.811722	0.643112	0.399186
HMCES	Q96FZ2	Embryonic stem cell-specific 5-hydroxymethylcytosine-binding protein	3	green	0.54292	0.523684	0.34185	NA	0.759563	0.799792	0.715691	NA	0.563567	0.580941	NA	NA	NA	NA
PURB	Q96QR8	Transcriptional activator protein Pur-beta	3	green	0.0860093	0.205212	0.331564	0.621643	0.811075	0.829958	0.836932	0.690862	0.682952	0.619149	NA	NA	NA	NA
PARP1	P09874	Poly [ADP-ribose] polymerase 1	3	green	0.354331	0.350263	0.340243	0.585086	0.829752	0.82433	0.83936	0.785426	0.790224	0.793444	0.892082	0.806868	0.558499	0.239422
TOP1	P11387	DNA topoisomerase 1	3	green	0.168766	0.207551	NA	NA	0.814227	0.791097	0.821594	0.816937	0.848179	0.914023	NA	NA	NA	NA
PCNA	P12004	Proliferating cell nuclear antigen	3	green	0.0992452	0.191924	0.327907	0.575066	0.745197	0.75991	0.765583	0.725456	0.717434	0.721293	NA	NA	NA	NA
PURA	Q00577	Transcriptional activator protein Pur-alpha	3	green	0.0853129	0.192678	0.323176	0.618965	0.759962	0.790808	0.771736	0.661005	0.648073	0.670652	NA	0.702168	NA	NA
MEPCE	Q7L2J0	7SK snRNA methylphosphate capping enzyme	4	yellow	NA	NA	NA	NA	NA	NA	NA	NA	NA	NA	0.988806	0.972663	0.707354	0.381601
HSPA1A, HSPA1B	P0DMV8, P0DMV9	Heat shock 70 kDa protein 1A, Heat shock 70 kDa protein 1B	4	yellow	0.11364	0.130125	0.341685	0.598326	0.248199	0.245522	0.217123	0.150801	0.161566	0.137195	0.915917	0.855211	0.657358	0.363592
HSPA8	P11142	Heat shock cognate 71 kDa protein	4	yellow	0.118787	0.147567	0.355716	0.580211	0.215902	0.213558	0.183133	0.180811	0.191906	0.164166	0.9117	0.856988	0.661315	0.37666
HIST1H2BJ, HIST1H2BO, HIST1H2BB, HIST2H2BE	P06899, P23527, P33778, Q16778	Histone H2B type 1-J, Histone H2B type 1-O, Histone H2B type 1-B, Histone H2B type 2-E	5	grey	NA	NA	0.4404	NA	0.550844	0.5504	0.588782	NA	NA	0.729992	NA	0.856781	0.686068	0.418726
TUBB	P07437	Tubulin beta chain	6	red	0.242757	0.230851	0.389488	0.521417	0.455993	0.453426	0.401323	0.316492	0.363941	0.341078	0.865599	0.846137	0.784673	0.504754
HSP90AA1	P07900	Heat shock protein HSP 90-alpha	6	red	0.28164	0.159144	0.392585	0.520958	0.57076	0.605647	0.580941	0.307292	0.343436	0.311925	0.73429	0.683684	0.535618	0.442642
HSP90AB1	P08238	Heat shock protein HSP 90-beta	6	red	0.271461	0.184393	0.393417	0.527852	0.541999	0.583646	0.552332	0.328129	0.360066	0.3321	0.829054	0.801894	0.683163	0.371599
ORF2	O00370		6	red	0.201329	0.33	0.344705	0.595033	0.49595	0.508672	0.455845	0.53166	0.541369	0.5135	0.910048	0.910595	0.907781	0.907515
UBB, UBC, RPS27A, UBA52	P0CG47, P0CG48, P62979, P62987	Polyubiquitin-B [Cleaved into: Ubiquitin], Polyubiquitin-C [Cleaved into: Ubiquitin], Ubiquitin-40S ribosomal protein S27a, Ubiquitin-60S ribosomal protein L40	6	red	0.184938	0.27356	0.368252	0.623006	0.611092	0.642564	0.615207	0.554903	0.612208	0.592768	0.928042	0.843452	0.639938	0.428813
TUBB4B	P68371	Tubulin beta-4B chain	6	red	0.258721	0.237006	0.393005	0.527245	0.476182	0.481357	0.427895	0.315251	0.365889	0.334358	0.905439	0.871847	0.752683	0.534949
HNRNPU	Q00839	Heterogeneous nuclear ribonucleoprotein U		grey	0.554823	0.373748	0.390426	0.619092	0.44532	0.44875	0.413528	0.461714	0.492236	0.467297	0.916819	0.748933	0.544875	0.27162
TIAL1	Q01085	Nucleolysin TIAR		grey	NA	NA	NA	NA	NA	0.481943	NA	NA	NA	NA	NA	NA	NA	NA
SRSF2	Q01130	Serine/arginine-rich splicing factor 2		grey	NA	NA	NA	NA	NA	NA	NA	NA	NA	NA	0.883096	0.643519	0.321252	0.106257
CAP1	Q01518	Adenylyl cyclase-associated protein 1		grey	NA	NA	NA	NA	NA	NA	NA	NA	0.407734	0.448927	NA	NA	NA	NA
OTUD4	Q01804	OTU domain-containing protein 4		grey	NA	NA	NA	NA	NA	NA	NA	NA	NA	NA	0.845969	0.621313	0.399565	0.237596
XPC	Q01831	DNA repair protein complementing XP-C cells		grey	0.255631	NA	NA	0.69512	0.690038	0.582429	0.528458	0.605305	0.621499	0.571954	NA	NA	NA	NA
DSG1	Q02413	Desmoglein-1		grey	NA	NA	0.239775	0.843249	0.0568396	NA	0.427629	0.221153	0.286122	NA	0.334403	NA	NA	NA
RPL18A	Q02543	60S ribosomal protein L18a		grey	NA	NA	NA	0.506919	0.351382	0.374104	0.340609	0.652089	0.664688	0.663809	0.958003	0.772189	0.633108	0.415605
RPL6	Q02878	60S ribosomal protein L6		grey	0.212468	0.16665	NA	NA	0.354735	0.368994	0.360049	0.646243	0.677544	0.675966	0.911127	0.781707	0.625398	0.399309
TOP2B	Q02880	DNA topoisomerase 2-beta		grey	NA	NA	NA	NA	0.401803	0.494975	0.366013	0.355994	0.408983	0.366198	NA	NA	NA	NA
SLC25A11	Q02978	Mitochondrial 2-oxoglutarate/malate carrier protein		grey	NA	NA	0.398551	0.550488	0.282243	0.333431	0.29373	0.257764	0.31836	0.327984	NA	NA	NA	NA
LMNB2	Q03252	Lamin-B2		grey	NA	NA	NA	NA	NA	NA	NA	NA	NA	0.278895	NA	NA	NA	NA
CEBPZ	Q03701	CCAAT/enhancer-binding protein zeta		grey	NA	NA	NA	NA	0.334354	0.369403	0.51494	0.542229	0.546588	0.690057	NA	NA	NA	NA
EIF4G1	Q04637	Eukaryotic translation initiation factor 4 gamma 1		grey	NA	NA	NA	NA	NA	0.559063	0.686324	0.514304	0.537166	0.573124	NA	NA	NA	NA
SSBP1	Q04837	Single-stranded DNA-binding protein, mitochondrial		grey	0.104977	0.171069	0.359188	0.560318	0.698841	0.675662	0.694339	0.482894	0.519716	0.536458	NA	0.770152	NA	NA
FMR1	Q06787	Synaptic functional regulator FMR1		grey	NA	0.162787	0.342023	0.581669	0.148494	0.141262	0.476741	NA	0.541305	NA	0.973431	0.834303	0.492844	0.175937
PRDX1	Q06830	Peroxiredoxin-1		grey	NA	NA	0.353144	0.573184	0.575678	0.629835	0.572302	0.381991	0.449342	0.443669	0.721363	0.731176	0.471355	0.252185
RPL18	Q07020	60S ribosomal protein L18		grey	0.153905	0.123081	0.351344	NA	0.352067	0.354797	0.352256	0.629341	0.663322	0.652983	0.940635	0.92196	0.772225	0.513169
TBKBP1	A7MCY6	TANK-binding kinase 1-binding protein 1		grey	NA	NA	NA	NA	NA	0.323328	0.140591	NA	NA	NA	NA	NA	NA	NA
C1QBP	Q07021	Complement component 1 Q subcomponent-binding protein, mitochondrial		grey	0.354905	NA	NA	NA	0.312015	0.3651	0.363025	0.339489	0.354514	0.305314	NA	NA	NA	NA
CKAP4	Q07065	Cytoskeleton-associated protein 4		grey	NA	NA	NA	NA	NA	NA	NA	NA	0.347948	NA	NA	NA	NA	NA
KHDRBS1	Q07666	KH domain-containing, RNA-binding, signal transduction-associated protein 1		grey	0.514469	NA	NA	0.601308	NA	0.539425	0.518583	NA	0.495505	0.488522	NA	NA	NA	NA
SRSF1	Q07955	Serine/arginine-rich splicing factor 1		grey	NA	NA	0.53034	NA	0.359557	0.188555	NA	NA	0.600256	NA	0.976258	0.670109	0.294886	0.0807336
SRSF4	Q08170	Serine/arginine-rich splicing factor 4		grey	NA	NA	NA	NA	NA	NA	NA	NA	NA	NA	0.895744	0.770611	0.450005	0.178989
DHX9	Q08211	ATP-dependent RNA helicase A		grey	0.696639	NA	0.497263	0.601388	0.5698	0.584009	0.543024	0.490578	0.533364	0.502364	0.905275	0.836412	0.66906	0.370186
DSC1	Q08554	Desmocollin-1		grey	NA	NA	NA	0.94007	NA	NA	NA	NA	NA	NA	NA	NA	NA	NA
SSRP1	Q08945	FACT complex subunit SSRP1		grey	0.245363	NA	0.366274	0.594403	0.575173	0.557032	0.542355	0.560691	0.550784	0.546259	NA	NA	NA	NA
RBBP4	Q09028	Histone-binding protein RBBP4		grey	NA	0.283366	0.407857	0.487543	0.580167	0.595174	0.605942	0.408613	0.402257	0.399677	NA	NA	NA	0.278567
NCBP1	Q09161	Nuclear cap-binding protein subunit 1		grey	0.216043	0.23686	NA	0.679787	0.284534	0.241677	0.241919	0.5001	0.551368	0.550703	0.917783	0.881453	0.771794	0.562229
AP1B1	Q10567	AP-1 complex subunit beta-1		grey	NA	NA	NA	NA	NA	NA	NA	NA	0.387949	0.374061	NA	NA	NA	NA
NUP160	Q12769	Nuclear pore complex protein Nup160		grey	NA	NA	NA	NA	0.422969	0.480139	0.370578	0.433861	0.387018	0.427931	NA	NA	NA	NA
TBL3	Q12788	Transducin beta-like protein 3		grey	NA	NA	NA	NA	0.481656	0.501222	0.467816	0.662595	0.611409	0.756181	0.960832	NA	0.68948	0.441905
SF3A3	Q12874	Splicing factor 3A subunit 3		grey	NA	NA	NA	NA	NA	NA	NA	NA	NA	NA	0.879367	0.870889	0.798841	0.510907
ILF2	Q12905	Interleukin enhancer-binding factor 2		grey	NA	NA	NA	0.598319	NA	NA	NA	NA	0.478406	0.481185	NA	0.819605	0.747283	NA
ILF3	Q12906	Interleukin enhancer-binding factor 3		grey	NA	NA	NA	NA	NA	0.492262	NA	NA	0.636654	0.520453	0.561461	0.754619	0.511552	0.313814
ELAVL4, ELAVL2	P26378, Q12926	ELAV-like protein 4, ELAV-like protein 2		grey	NA	NA	NA	NA	NA	NA	NA	NA	NA	NA	0.73292	0.793525	0.759355	0.395149
TRAP1	Q12931	Heat shock protein 75 kDa, mitochondrial		grey	NA	NA	NA	NA	NA	0.479644	0.345794	0.255104	0.308332	0.25572	NA	NA	NA	NA
FLII	Q13045	Protein flightless-1 homolog		grey	NA	NA	NA	NA	NA	NA	NA	0.45778	0.358114	0.35874	NA	NA	NA	NA
IK	Q13123	Protein Red		grey	NA	NA	NA	NA	NA	NA	NA	NA	NA	NA	0.919185	0.824872	0.768674	0.464109
NACA	E9PAV3	Nascent polypeptide-associated complex subunit alpha, muscle-specific form		grey	NA	NA	NA	NA	NA	NA	NA	NA	0.34805	NA	NA	NA	NA	NA
TARDBP	Q13148	TAR DNA-binding protein 43		grey	NA	NA	NA	0.413411	0.678332	0.621026	0.679138	0.686795	0.658423	0.724206	0.903723	NA	NA	0.445676
HNRNPA0	Q13151	Heterogeneous nuclear ribonucleoprotein A0		grey	NA	NA	NA	0.529796	NA	NA	NA	NA	NA	NA	NA	NA	NA	NA
AIMP2	Q13155	Aminoacyl tRNA synthase complex-interacting multifunctional protein 2		grey	NA	NA	NA	NA	NA	NA	NA	NA	0.417728	0.462626	NA	NA	NA	NA
PSMD2	Q13200	26S proteasome non-ATPase regulatory subunit 2		grey	NA	NA	NA	0.587275	0.572083	0.52485	0.539383	0.380371	0.388985	0.37916	NA	NA	NA	NA
DDX10	Q13206	Probable ATP-dependent RNA helicase DDX10		grey	NA	NA	NA	NA	0.427298	0.481828	NA	NA	NA	NA	NA	NA	NA	NA
SRSF9	Q13242	Serine/arginine-rich splicing factor 9		grey	NA	NA	0.387439	0.681533	0.280808	0.206368	NA	NA	0.537251	NA	0.974845	0.665216	0.299985	0.0759461
SRSF5	Q13243	Serine/arginine-rich splicing factor 5		grey	NA	NA	NA	NA	NA	NA	NA	NA	NA	NA	0.816598	0.697995	0.607782	0.425763
SRSF6	Q13247	Serine/arginine-rich splicing factor 6		grey	NA	NA	NA	NA	0.337836	0.28395	NA	NA	NA	NA	0.910802	0.713352	0.388619	0.123215
TRIM28	Q13263	Transcription intermediary factor 1-beta		grey	NA	NA	NA	NA	NA	0.580326	NA	NA	0.552252	NA	NA	NA	NA	NA
G3BP1	Q13283	Ras GTPase-activating protein-binding protein 1		grey	NA	NA	NA	NA	0.618902	0.621083	NA	0.559491	0.598329	0.546238	NA	NA	NA	NA
EIF3I	Q13347	Eukaryotic translation initiation factor 3 subunit I		grey	NA	NA	NA	NA	NA	0.61085	NA	0.411657	0.454134	0.446489	NA	NA	NA	NA
DYNC1I2	Q13409	Cytoplasmic dynein 1 intermediate chain 2		grey	NA	NA	NA	NA	NA	0.414886	0.251637	0.370566	0.430547	0.32395	NA	NA	NA	NA
PPIG	Q13427	Peptidyl-prolyl cis-trans isomerase G		grey	NA	NA	NA	NA	NA	0.371804	NA	NA	NA	NA	0.903737	0.678808	0.383329	0.140798
DDX39A	O00148	ATP-dependent RNA helicase DDX39A		grey	NA	NA	NA	NA	NA	NA	NA	NA	NA	NA	0.967574	0.846699	0.72046	0.432009
SF3B2	Q13435	Splicing factor 3B subunit 2		grey	NA	NA	NA	NA	NA	0.314195	NA	NA	NA	NA	0.889087	0.886644	0.775553	0.550481
PRPF4B	Q13523	Serine/threonine-protein kinase PRP4 homolog		grey	NA	NA	NA	NA	NA	NA	NA	NA	NA	NA	NA	0.479741	0.314843	0.274042
CAMK2D	Q13557	Calcium/calmodulin-dependent protein kinase type II subunit delta		grey	NA	NA	NA	NA	NA	NA	NA	NA	0.320541	NA	NA	NA	NA	NA
SNW1	Q13573	SNW domain-containing protein 1		grey	NA	NA	NA	NA	NA	0.384233	NA	NA	NA	0.647813	0.854696	0.845945	0.740624	0.504509
TRA2A	Q13595	Transformer-2 protein homolog alpha		grey	0.453047	0.52021	0.50005	0.742093	0.287089	0.271344	0.206166	0.561307	0.613258	0.554308	0.976647	0.866699	0.636324	0.320103
KRR1	Q13601	KRR1 small subunit processome component homolog		grey	NA	NA	NA	NA	0.38227	0.37573	0.351201	0.641628	0.695817	0.693918	0.710807	NA	0.702514	0.401667
PWP1	Q13610	Periodic tryptophan protein 1 homolog		grey	NA	NA	NA	NA	NA	0.347952	0.528035	NA	0.689826	NA	NA	NA	NA	NA
SPTAN1	Q13813	Spectrin alpha chain, non-erythrocytic 1		grey	NA	NA	NA	NA	NA	NA	NA	0.345674	NA	NA	NA	NA	NA	NA
GNL2	Q13823	Nucleolar GTP-binding protein 2		grey	NA	NA	NA	NA	0.470392	NA	NA	NA	NA	NA	NA	NA	NA	NA
PKP1	Q13835	Plakophilin-1		grey	NA	NA	NA	NA	NA	NA	NA	0.0201516	NA	NA	NA	NA	NA	NA
DDX39B	Q13838	Spliceosome RNA helicase DDX39B		grey	0.159904	0.102022	NA	0.556573	0.430903	0.402999	0.393701	0.641962	0.669203	0.648864	0.911863	0.860839	0.731342	0.453621
BYSL	Q13895	Bystin		grey	NA	NA	NA	NA	0.362245	0.449181	NA	0.609634	NA	NA	NA	NA	NA	NA
HNRNPD	Q14103	Heterogeneous nuclear ribonucleoprotein D0		grey	0.686176	NA	NA	NA	0.518768	0.536973	0.48439	0.627658	0.633928	0.557992	0.890641	0.674479	0.377808	0.149942
BOP1	Q14137	Ribosome biogenesis protein BOP1		grey	NA	NA	NA	NA	0.389052	0.38985	0.436537	0.616432	0.7128	0.690489	NA	0.843882	0.790396	0.337367
SAFB2	Q14151	Scaffold attachment factor B2		grey	NA	NA	0.386096	0.695551	NA	NA	NA	NA	NA	NA	0.905918	0.651689	0.401803	0.207155
EIF3A	Q14152	Eukaryotic translation initiation factor 3 subunit A		grey	NA	NA	NA	NA	0.555536	0.538618	0.419277	0.404691	0.432199	0.431683	NA	NA	NA	NA
UBAP2L	Q14157	Ubiquitin-associated protein 2-like		grey	NA	NA	NA	NA	0.581782	0.43536	0.441756	0.54181	0.518142	0.448489	NA	NA	NA	NA
SCRIB	Q14160	Protein scribble homolog		grey	NA	NA	NA	NA	0.428699	0.397561	NA	0.309025	NA	NA	NA	NA	NA	NA
DCTN1	Q14203	Dynactin subunit 1		grey	NA	NA	NA	NA	NA	NA	0.40133	0.270744	0.275614	0.270701	NA	NA	NA	NA
DYNC1H1	Q14204	Cytoplasmic dynein 1 heavy chain 1		grey	NA	NA	NA	NA	0.369419	0.384396	0.347237	0.31024	0.357017	0.317574	NA	NA	NA	NA
RCN2	Q14257	Reticulocalbin-2		grey	0.18284	0.352497	0.315565	0.619256	0.199533	0.210335	0.185296	0.210784	0.23524	0.212102	NA	NA	NA	NA
RBM39	Q14498	RNA-binding protein 39		grey	0.269529	0.207245	0.343767	0.580282	0.403459	0.410329	0.364898	0.372372	0.413476	0.389347	0.911087	0.809893	0.617122	0.361312
DHX8	Q14562	ATP-dependent RNA helicase DHX8		grey	NA	NA	NA	NA	NA	NA	NA	NA	NA	NA	NA	0.722784	0.435341	0.177517
SMC1A	Q14683	Structural maintenance of chromosomes protein 1A		grey	NA	NA	NA	NA	0.632028	0.4491	0.40327	0.418053	0.445762	0.416328	NA	NA	NA	NA
PDCD11	Q14690	Protein RRP5 homolog		grey	NA	NA	NA	NA	0.505587	0.473687	0.481156	NA	NA	NA	NA	NA	NA	NA
BMS1	Q14692	Ribosome biogenesis protein BMS1 homolog		grey	NA	NA	NA	NA	0.435484	0.434648	0.390355	0.70653	0.71582	0.688784	NA	0.684692	0.802411	0.427502
GANAB	Q14697	Neutral alpha-glucosidase AB		grey	NA	NA	NA	NA	0.595338	0.649147	0.563376	0.35594	0.402318	0.372462	NA	NA	NA	NA
LBR	Q14739	Lamin-B receptor		grey	NA	NA	NA	NA	NA	NA	0.491467	0.54747	0.408396	0.383694	NA	NA	NA	NA
CHD4	Q14839	Chromodomain-helicase-DNA-binding protein 4		grey	NA	NA	NA	NA	0.333587	0.430443	0.400494	0.375043	0.425218	0.375889	NA	NA	NA	NA
KPNB1	Q14974	Importin subunit beta-1		grey	0.302878	0.212008	NA	0.5977	0.401054	0.392588	0.370566	0.325332	0.367625	0.357566	NA	NA	NA	NA
NCAPH	Q15003	Condensin complex subunit 2		grey	NA	NA	NA	NA	0.307278	0.436019	0.423176	0.260525	0.367609	0.37332	NA	NA	NA	NA
SART3	Q15020	Squamous cell carcinoma antigen recognized by T-cells 3		grey	NA	NA	NA	NA	0.581625	0.520223	0.428081	0.595813	0.607073	0.570797	NA	NA	NA	NA
EFTUD2	Q15029	116 kDa U5 small nuclear ribonucleoprotein component		grey	NA	NA	0.457618	0.668852	0.451372	0.479416	0.460567	0.479895	0.494004	0.478199	0.916535	0.869953	0.777114	0.54959
RRS1	Q15050	Ribosome biogenesis regulatory protein homolog		grey	NA	NA	NA	NA	0.290961	0.334115	0.290634	0.608289	0.691034	0.570299	0.824423	0.812986	0.677607	0.412897
WDR43	Q15061	WD repeat-containing protein 43		grey	NA	NA	NA	0.616641	0.46774	0.443953	0.437178	0.605196	0.698386	0.686579	NA	0.944684	0.713336	0.329471
PDIA6	Q15084	Protein disulfide-isomerase A6		grey	NA	NA	NA	NA	0.61494	0.611786	0.606609	0.382758	0.41028	0.361231	NA	NA	NA	NA
PLEC	Q15149	Plectin		grey	NA	NA	NA	NA	NA	NA	NA	NA	0.415581	0.331077	NA	NA	NA	NA
PTGES3	Q15185	Prostaglandin E synthase 3		grey	0.258837	NA	NA	NA	NA	NA	NA	0.456879	NA	0.4445	NA	NA	NA	NA
STK38	Q15208	Serine/threonine-protein kinase 38		grey	0.0923613	0.176719	0.282604	0.630819	0.488397	0.430138	0.368723	0.307239	0.37509	0.272637	0.912709	0.839047	0.485199	0.19323
NONO	Q15233	Non-POU domain-containing octamer-binding protein		grey	NA	NA	NA	0.691219	NA	0.721487	NA	0.66611	0.513571	NA	NA	NA	NA	NA
PWP2	Q15269	Periodic tryptophan protein 2 homolog		grey	NA	NA	NA	NA	0.479237	0.465989	0.444956	0.664294	0.643367	0.683834	0.409395	0.0966168	0.367097	0.253559
RNPS1	Q15287	RNA-binding protein with serine-rich domain 1		grey	NA	NA	0.332938	0.594651	0.420475	0.42598	NA	0.589052	NA	NA	0.912869	0.747175	0.476111	0.184884
RCN1	Q15293	Reticulocalbin-1		grey	NA	NA	0.32325	0.572439	0.278801	0.303184	0.334115	0.310597	0.297427	0.347974	NA	NA	NA	NA
PCBP1	Q15365	Poly(rC)-binding protein 1		grey	NA	NA	0.388207	NA	0.476053	0.654183	0.603474	0.527589	0.594139	0.589407	0.845038	0.867889	0.690019	0.383777
PCBP2	Q15366	Poly(rC)-binding protein 2		grey	0.275431	0.239889	0.404038	0.619283	0.528435	0.524444	0.508503	0.56904	0.610167	0.591953	0.919537	0.81208	0.605663	0.340156
SF3B3	Q15393	Splicing factor 3B subunit 3		grey	0.417273	NA	NA	NA	0.404006	0.464427	0.496984	0.447666	0.484198	0.46751	0.922607	0.926756	0.797796	0.580326
PUM3	Q15397	Pumilio homolog 3		grey	NA	NA	NA	NA	0.43917	0.304111	0.323753	0.671323	0.737001	0.607258	NA	0.737195	NA	NA
SAFB	Q15424	Scaffold attachment factor B1		grey	NA	NA	NA	0.731224	NA	0.449863	NA	NA	NA	NA	0.92475	0.613586	0.372053	0.213589
SF3A2	Q15428	Splicing factor 3A subunit 2		grey	NA	NA	NA	NA	NA	NA	NA	NA	NA	NA	0.853454	0.848257	0.774861	0.599198
SF3A1	Q15459	Splicing factor 3A subunit 1		grey	NA	NA	NA	NA	NA	NA	NA	NA	NA	NA	0.927541	0.932024	0.795401	0.538085
SF1	Q15637	Splicing factor 1		grey	NA	NA	NA	NA	NA	NA	0.315935	NA	NA	0.328521	NA	NA	NA	NA
ELAVL1	Q15717	ELAV-like protein 1		grey	NA	NA	0.439942	0.632055	NA	NA	NA	NA	NA	NA	0.909297	0.746405	0.476017	0.161918
DDB1	Q16531	DNA damage-binding protein 1		grey	0.139437	0.181373	0.352596	0.610303	0.518536	0.521027	0.50831	0.508768	0.517631	0.512052	NA	NA	NA	NA
RBBP7	Q16576	Histone-binding protein RBBP7		grey	NA	NA	NA	NA	NA	NA	0.588917	0.387878	0.410144	0.413187	NA	NA	NA	NA
SRSF7	Q16629	Serine/arginine-rich splicing factor 7		grey	0.38627	0.388969	0.526874	0.749294	0.25496	0.183613	0.184326	0.516885	0.566687	0.493301	0.977478	0.787406	0.412373	0.103854
PFKFB3	Q16875	6-phosphofructo-2-kinase/fructose-2,6-bisphosphatase 3		grey	NA	NA	NA	NA	NA	NA	NA	NA	NA	NA	0.589575	0.695391	0.516978	0.179326
IMMT	Q16891	MICOS complex subunit MIC60		grey	NA	NA	NA	NA	0.364139	0.384895	0.347024	0.26838	0.294866	0.297437	NA	NA	NA	NA
HNRNPUL2-BSCL2, HNRNPUL2	H3BQZ7, Q1KMD3	HCG2044799, Heterogeneous nuclear ribonucleoprotein U-like protein 2		grey	NA	NA	NA	NA	0.385625	0.371989	0.353913	0.490513	0.540018	0.515104	0.891185	0.581397	0.237636	0.105049
EIF3F	O00303	Eukaryotic translation initiation factor 3 subunit F		grey	NA	NA	NA	NA	NA	NA	NA	NA	0.361243	0.404751	NA	NA	NA	NA
SMU1	Q2TAY7	WD40 repeat-containing protein SMU1		grey	NA	NA	NA	NA	NA	NA	NA	NA	NA	NA	0.99316	0.88798	0.767507	0.545455
TUBB8	Q3ZCM7	Tubulin beta-8 chain		grey	NA	NA	NA	NA	NA	0.457191	0.41925	NA	0.373508	0.334735	NA	NA	NA	NA
TIMM50	Q3ZCQ8	Mitochondrial import inner membrane translocase subunit TIM50		grey	NA	0.327493	NA	0.580339	0.337582	0.303936	0.263986	0.30397	0.318908	0.294463	NA	NA	NA	NA
GLYR1	Q49A26	Putative oxidoreductase GLYR1		grey	NA	NA	NA	NA	NA	NA	NA	NA	NA	NA	0.359377	NA	NA	NA
IPO5	O00410	Importin-5		grey	NA	NA	NA	NA	0.552693	0.537807	NA	0.356905	0.411817	0.421992	NA	NA	NA	NA
NCBP3	Q53F19	Nuclear cap-binding protein subunit 3		grey	NA	NA	NA	NA	NA	NA	NA	NA	NA	NA	0.91296	0.853153	0.713639	0.437678
HSD17B12	Q53GQ0	Very-long-chain 3-oxoacyl-CoA reductase		grey	NA	NA	NA	NA	NA	NA	NA	NA	0.351222	NA	NA	NA	NA	NA
AGK	Q53H12	Acylglycerol kinase, mitochondrial		grey	NA	NA	NA	NA	NA	NA	NA	NA	NA	0.322851	NA	NA	NA	NA
ACTBL2	Q562R1	Beta-actin-like protein 2		grey	NA	NA	NA	NA	0.557952	NA	NA	NA	NA	NA	NA	NA	NA	NA
ZNF326	Q5BKZ1	DBIRD complex subunit ZNF326		grey	NA	NA	NA	NA	0.566179	0.527477	0.52888	0.591653	0.600543	0.580449	0.829825	0.697282	0.478977	0.258402
NOM1	Q5C9Z4	Nucleolar MIF4G domain-containing protein 1		grey	NA	NA	NA	NA	NA	NA	0.382807	NA	0.399443	NA	NA	NA	NA	NA
PPP6R3	Q5H9R7	Serine/threonine-protein phosphatase 6 regulatory subunit 3		grey	0.224265	0.300472	NA	NA	0.308537	0.297363	0.306975	0.347918	0.345276	0.323007	NA	NA	NA	NA
AMER1	Q5JTC6	APC membrane recruitment protein 1		grey	NA	NA	NA	NA	0.242172	0.356479	0.253347	NA	0.400487	0.310516	NA	NA	NA	NA
SAP18	O00422	Histone deacetylase complex subunit SAP18		grey	NA	NA	NA	0.606973	NA	NA	NA	NA	NA	NA	NA	0.746154	0.475836	0.19334
RRP12	Q5JTH9	RRP12-like protein		grey	NA	NA	NA	NA	0.457889	0.43674	0.455264	0.645415	0.626629	0.722738	NA	NA	NA	0.358839
AARS2	Q5JTZ9	Alanine--tRNA ligase, mitochondrial		grey	NA	NA	NA	NA	NA	0.494168	0.423212	0.271636	0.307661	0.289909	NA	NA	NA	NA
DNTTIP2	Q5QJE6	Deoxynucleotidyltransferase terminal-interacting protein 2		grey	NA	NA	NA	NA	0.443486	0.444111	0.41898	0.599728	0.6293	0.596758	NA	NA	NA	0.435551
NOL9	Q5SY16	Polynucleotide 5'-hydroxyl-kinase NOL9		grey	NA	NA	NA	NA	0.434037	0.380705	0.339289	NA	0.398438	0.381877	NA	NA	NA	NA
IGF2BP3	O00425	Insulin-like growth factor 2 mRNA-binding protein 3		grey	0.160532	0.281254	NA	0.690212	0.328151	0.311977	0.282388	0.544544	0.559025	0.552813	0.916569	0.856768	0.734438	0.504705
PRPF38B	Q5VTL8	Pre-mRNA-splicing factor 38B		grey	NA	NA	NA	NA	NA	NA	NA	NA	NA	NA	NA	0.826452	0.636522	0.222347
FAM208B	Q5VWN6	Protein FAM208B		grey	NA	NA	NA	NA	NA	NA	NA	NA	NA	NA	NA	0.86358	0.687334	NA
KPNA3	O00505	Importin subunit alpha-4		grey	NA	NA	NA	NA	NA	0.711408	NA	0.670478	0.714196	0.647428	NA	NA	NA	NA
SLC25A24	Q6NUK1	Calcium-binding mitochondrial carrier protein SCaMC-1		grey	NA	NA	NA	NA	NA	NA	0.326005	0.534862	0.359077	0.337665	NA	NA	NA	NA
EDC4	Q6P2E9	Enhancer of mRNA-decapping protein 4		grey	NA	NA	NA	NA	0.468786	0.546012	0.526784	0.42718	0.475965	0.437111	NA	NA	NA	NA
PRPF8	Q6P2Q9	Pre-mRNA-processing-splicing factor 8		grey	NA	NA	0.482466	0.704201	0.450549	0.479194	0.447422	0.515527	0.520453	0.534905	0.923635	0.888189	0.787609	0.558284
SCYL2	Q6P3W7	SCY1-like protein 2		grey	NA	NA	NA	NA	NA	NA	NA	NA	NA	0.540293	0.88561	NA	NA	0.149862
SFXN4	Q6P4A7	Sideroflexin-4		grey	NA	NA	NA	NA	NA	NA	NA	NA	NA	0.242195	NA	NA	NA	NA
DARS2	Q6PI48	Aspartate--tRNA ligase, mitochondrial		grey	NA	NA	NA	NA	NA	NA	0.583576	0.384092	0.485808	0.368659	NA	NA	NA	NA
PES1	O00541	Pescadillo homolog		grey	NA	NA	NA	NA	0.437924	0.435631	0.412169	0.711108	0.685643	0.722577	0.970329	0.864912	0.642793	0.384274
ZC3H14	Q6PJT7	Zinc finger CCCH domain-containing protein 14		grey	NA	NA	NA	NA	NA	NA	NA	NA	NA	NA	0.879844	0.798012	0.575155	0.255049
LARP1	Q6PKG0	La-related protein 1		grey	0.513784	0.591247	0.485903	0.601757	0.254671	0.240756	0.205851	0.491309	0.504484	0.479798	0.880386	0.834182	0.709125	0.387202
LIN28B	Q6ZN17	Protein lin-28 homolog B		grey	NA	NA	NA	NA	0.325805	0.227411	0.223138	NA	NA	NA	NA	NA	NA	NA
HIST3H3, H3F3C, HIST2H3A;	Q16695, Q6NXT2, Q71DI3	Histone H3.1t, Histone H3.3C, Histone H3.2		grey	0.531945	0.186484	0.4272	0.586187	0.626963	0.60815	0.611831	0.738446	0.75364	0.763571	0.958693	0.862361	0.727654	0.477526
LARP4	Q71RC2	La-related protein 4		grey	NA	NA	NA	NA	NA	0.405826	0.39531	0.494939	0.53883	0.504509	NA	NA	NA	NA
TUBA3C, TUBA3E, TUBA1A	Q13748, Q6PEY2, Q71U36	Tubulin alpha-3C/D chain, Tubulin alpha-3E chain, Tubulin alpha-1A chain		grey	NA	NA	NA	0.501998	0.464605	0.396285	NA	0.387671	0.420236	NA	NA	NA	NA	NA
SUPT6H	Q7KZ85	Transcription elongation factor SPT6		grey	NA	NA	NA	NA	0.422776	0.406563	0.459897	NA	NA	NA	NA	0.838454	0.581555	0.238507
MPHOSPH10	O00566	U3 small nucleolar ribonucleoprotein protein MPP10		grey	NA	NA	NA	NA	0.418834	0.426072	NA	NA	0.68749	NA	NA	NA	NA	0.794383
SND1	Q7KZF4	Staphylococcal nuclease domain-containing protein 1		grey	NA	NA	NA	NA	0.594205	0.67888	0.651556	0.523605	0.552873	0.533517	NA	NA	NA	NA
DHX30	Q7L2E3	Putative ATP-dependent RNA helicase DHX30		grey	NA	NA	NA	NA	0.353892	0.266534	0.326989	0.385647	0.387353	0.327152	0.885845	0.635913	0.64105	0.287379
NOP56	O00567	Nucleolar protein 56		grey	NA	NA	NA	0.579609	0.408662	0.415393	0.386973	0.577381	0.611092	0.583957	0.880802	0.860883	0.688474	0.398098
PHF5A	Q7RTV0	PHD finger-like domain-containing protein 5A		grey	NA	NA	NA	NA	NA	NA	NA	NA	NA	NA	NA	0.879347	0.841396	0.644305
ZC3HAV1	Q7Z2W4	Zinc finger CCCH-type antiviral protein 1		grey	NA	NA	NA	NA	0.481314	0.52176	0.54246	0.541011	0.5671	0.557503	NA	NA	NA	NA
HDX	Q7Z353	Highly divergent homeobox		grey	NA	NA	NA	NA	NA	NA	NA	NA	NA	NA	0.927389	0.840815	0.587765	0.290111
DDX3X	O00571	ATP-dependent RNA helicase DDX3X		grey	NA	0.370124	0.414516	0.572485	0.604274	0.609207	0.581467	0.525369	0.544274	0.517421	0.942459	0.813527	0.521485	0.18316
HUWE1	Q7Z6Z7	E3 ubiquitin-protein ligase HUWE1		grey	NA	0.197504	NA	NA	0.581485	0.549123	0.561807	0.354701	0.400767	0.379591	NA	NA	NA	NA
PABPN1	Q86U42	Polyadenylate-binding protein 2		grey	NA	NA	NA	NA	NA	NA	NA	NA	NA	NA	0.890129	0.558323	0.115412	0.0220384
KPNA4	O00629	Importin subunit alpha-3		grey	NA	0.167535	NA	NA	0.789283	0.784891	0.855864	0.700437	NA	0.732219	NA	NA	NA	NA
ALYREF	Q86V81	THO complex subunit 4		grey	NA	NA	NA	NA	NA	NA	NA	NA	NA	NA	0.975399	0.611862	0.240422	0.0548329
ZC3H18	Q86VM9	Zinc finger CCCH domain-containing protein 18		grey	NA	NA	NA	NA	0.323639	0.321795	0.320435	0.301183	0.311821	0.306201	NA	NA	NA	0.170056
CAND1	Q86VP6	Cullin-associated NEDD8-dissociated protein 1		grey	NA	NA	NA	NA	0.491705	0.476294	0.484807	0.37065	0.415338	0.411779	NA	NA	NA	NA
PPP6C	O00743	Serine/threonine-protein phosphatase 6 catalytic subunit		grey	NA	NA	0.350784	0.579213	NA	NA	0.379799	NA	NA	0.372053	NA	NA	NA	NA
WDR75	Q8IWA0	WD repeat-containing protein 75		grey	NA	NA	NA	NA	0.493427	0.461807	0.505269	0.63374	0.643379	0.66373	NA	NA	NA	0.346397
CHERP	Q8IWX8	Calcium homeostasis endoplasmic reticulum protein		grey	NA	NA	NA	NA	NA	NA	NA	NA	NA	NA	0.90719	NA	0.671798	0.212567
SUGP2	Q8IX01	SURP and G-patch domain-containing protein 2		grey	NA	NA	NA	NA	0.410784	0.410304	0.389082	0.316347	0.393583	0.37799	NA	NA	NA	NA
DNAJC10	Q8IXB1	DnaJ homolog subfamily C member 10		grey	NA	NA	NA	NA	0.361092	0.330678	0.283986	0.629835	NA	0.329341	NA	NA	NA	NA
RBM12B	Q8IXT5	RNA-binding protein 12B		grey	NA	NA	NA	NA	NA	0.607566	NA	NA	NA	NA	0.906766	0.875534	0.622898	0.319014
FTSJ3	Q8IY81	pre-rRNA processing protein FTSJ3		grey	NA	NA	NA	NA	0.414866	0.354589	0.330109	0.625075	0.656959	0.725795	NA	0.79844	0.746219	0.311318
SRRM1	Q8IYB3	Serine/arginine repetitive matrix protein 1		grey	NA	NA	NA	NA	NA	NA	NA	NA	NA	NA	NA	NA	0.694545	NA
NUP93	Q8N1F7	Nuclear pore complex protein Nup93		grey	NA	NA	NA	NA	0.410158	0.43461	0.360785	0.283195	0.375632	0.375624	NA	NA	NA	NA
ASCC3	Q8N3C0	Activating signal cointegrator 1 complex subunit 3		grey	NA	NA	NA	NA	0.523333	0.602085	0.539213	0.456776	0.494998	0.473515	NA	NA	NA	NA
NKAP	Q8N5F7	NF-kappa-B-activating protein		grey	NA	NA	NA	NA	NA	NA	NA	NA	NA	NA	NA	0.696547	NA	NA
KRI1	Q8N9T8	Protein KRI1 homolog		grey	NA	NA	NA	NA	0.409922	0.415218	0.397583	0.62835	0.676595	NA	0.45267	0.851328	0.68998	0.231951
PRPF38A	Q8NAV1	Pre-mRNA-splicing factor 38A		grey	NA	NA	NA	NA	NA	NA	NA	NA	NA	NA	0.918923	0.890539	0.74916	0.613855
ABCF1	Q8NE71	ATP-binding cassette sub-family F member 1		grey	NA	NA	NA	NA	0.543712	0.654481	0.628874	0.446462	0.543671	0.568165	NA	NA	NA	NA
PPHLN1	Q8NEY8	Periphilin-1		grey	NA	NA	NA	NA	NA	NA	NA	NA	NA	NA	0.906328	0.775291	0.562402	0.281609
CEP70	Q8NHQ1	Centrosomal protein of 70 kDa		grey	NA	NA	NA	NA	NA	NA	NA	NA	NA	NA	0.527812	NA	0.497543	0.27171
THOC2	Q8NI27	THO complex subunit 2		grey	NA	NA	NA	NA	0.365671	NA	NA	NA	0.390158	NA	NA	NA	NA	NA
WDR36	Q8NI36	WD repeat-containing protein 36		grey	NA	NA	NA	NA	0.458285	0.453898	0.438464	0.639028	0.636813	0.598668	0.345057	0.864453	0.67769	0.412041
COQ8A	Q8NI60	Atypical kinase COQ8A, mitochondrial		grey	NA	NA	NA	NA	0.197367	0.218988	0.158717	NA	0.267093	0.224968	NA	NA	NA	NA
NEK9	Q8TD19	Serine/threonine-protein kinase Nek9		grey	NA	NA	NA	NA	NA	NA	0.517491	NA	0.412729	NA	NA	NA	NA	NA
DDX54	Q8TDD1	ATP-dependent RNA helicase DDX54		grey	NA	NA	NA	NA	NA	0.433409	NA	NA	NA	NA	NA	NA	NA	NA
BRIX1	Q8TDN6	Ribosome biogenesis protein BRX1 homolog		grey	NA	NA	0.510404	NA	0.352063	0.333578	0.319626	0.660626	0.67542	0.680695	0.913562	0.818132	0.73621	0.464312
UTP15	Q8TED0	U3 small nucleolar RNA-associated protein 15 homolog		grey	NA	NA	0.521187	0.620401	0.470897	0.434629	0.385315	0.616917	0.600671	0.608611	NA	NA	0.658936	0.426155
CHD1	O14646	Chromodomain-helicase-DNA-binding protein 1		grey	NA	NA	NA	NA	NA	NA	NA	NA	NA	NA	0.861098	0.520499	0.274137	0.117598
NUP210	Q8TEM1	Nuclear pore membrane glycoprotein 210		grey	NA	NA	NA	NA	NA	0.519646	NA	NA	NA	NA	NA	NA	NA	NA
GEMIN5	Q8TEQ6	Gem-associated protein 5		grey	NA	NA	NA	NA	NA	0.603175	0.526515	0.511098	0.480579	0.489311	NA	NA	NA	NA
IPO4	Q8TEX9	Importin-4		grey	NA	NA	NA	NA	0.568389	0.537615	0.49727	0.502859	0.501147	0.526066	NA	NA	NA	NA
NOC3L	Q8WTT2	Nucleolar complex protein 3 homolog		grey	NA	NA	NA	NA	NA	0.362379	NA	NA	NA	NA	NA	NA	NA	NA
NUP133	Q8WUM0	Nuclear pore complex protein Nup133		grey	NA	NA	NA	NA	0.292526	0.336007	0.303349	0.270435	0.386266	0.315748	NA	NA	NA	NA
PDCD6IP	Q8WUM4	Programmed cell death 6-interacting protein		grey	NA	NA	NA	NA	0.519923	0.493029	0.501719	0.414139	0.477436	0.444219	NA	NA	NA	NA
TRIM41	Q8WV44	E3 ubiquitin-protein ligase TRIM41		grey	NA	NA	NA	NA	0.157476	0.1838	0.259621	NA	NA	NA	NA	NA	NA	NA
ATXN2L	Q8WWM7	Ataxin-2-like protein		grey	NA	NA	NA	NA	0.513619	0.497735	0.45864	0.580766	0.592452	0.555022	NA	NA	NA	NA
PHIP	Q8WWQ0	PH-interacting protein		grey	NA	NA	NA	NA	NA	NA	NA	0.536651	0.557052	NA	NA	NA	NA	NA
IRS4	O14654	Insulin receptor substrate 4		grey	0.235562	0.314693	0.308002	0.603992	0.324196	0.330831	0.290891	0.28416	0.304541	0.285311	0.731975	0.844254	NA	NA
SRSF12	Q8WXF0	Serine/arginine-rich splicing factor 12		grey	NA	NA	NA	NA	NA	NA	NA	NA	NA	NA	NA	0.80931	0.601419	0.226491
DDX1	Q92499	ATP-dependent RNA helicase DDX1		grey	NA	NA	NA	NA	0.64911	0.670315	NA	0.403786	0.587765	0.504828	NA	NA	NA	NA
MRPS27	Q92552	28S ribosomal protein S27, mitochondrial		grey	NA	NA	0.421474	NA	NA	0.35187	0.259879	NA	0.523083	NA	NA	NA	NA	NA
HSPH1	Q92598	Heat shock protein 105 kDa		grey	NA	NA	NA	NA	0.64613	0.623975	0.560768	0.367181	0.416573	0.369431	NA	NA	NA	NA
LARP4B	Q92615	La-related protein 4B		grey	NA	NA	NA	NA	0.431308	NA	0.616329	0.521119	NA	0.459521	NA	NA	NA	NA
GCN1	Q92616	eIF-2-alpha kinase activator GCN1		grey	NA	NA	NA	NA	0.462276	0.45561	0.480495	0.467309	0.459655	0.474359	NA	NA	NA	NA
NUP205	Q92621	Nuclear pore complex protein Nup205		grey	NA	NA	NA	NA	0.397511	0.425974	0.364389	0.334168	0.336923	0.33312	NA	NA	NA	NA
PRMT5	O14744	Protein arginine N-methyltransferase 5		grey	0.157966	0.160751	0.314585	0.593951	0.530009	0.541221	0.542041	0.355018	0.412825	0.383063	0.908587	0.777005	0.550279	0.257174
DDX17	Q92841	Probable ATP-dependent RNA helicase DDX17		grey	0.563128	0.333912	0.41373	0.612685	0.503747	0.516254	0.479234	0.464748	0.475635	0.43746	0.883917	0.841156	0.56446	0.217025
KHSRP	Q92945	Far upstream element-binding protein 2		grey	NA	NA	NA	NA	0.417456	0.325154	0.328273	0.505807	0.41463	0.461396	NA	NA	NA	0.198384
TNPO1	Q92973	Transportin-1		grey	NA	NA	NA	NA	0.523219	0.624709	NA	0.429396	0.448114	NA	NA	NA	NA	NA
UTP4	Q969X6	U3 small nucleolar RNA-associated protein 4 homolog		grey	NA	NA	NA	NA	0.471671	0.441138	0.452301	0.65764	0.669203	0.624131	NA	NA	NA	0.458494
PSMA7, PSMA8	O14818, Q8TAA3	Proteasome subunit alpha type-7, Proteasome subunit alpha type-7-like		grey	NA	NA	NA	NA	NA	NA	NA	NA	0.515081	NA	NA	NA	NA	NA
FAF2	Q96CS3	FAS-associated factor 2		grey	NA	NA	NA	NA	NA	NA	NA	NA	0.496186	0.486526	NA	NA	NA	NA
GPRASP2	Q96D09	G-protein coupled receptor-associated sorting protein 2		grey	NA	NA	NA	NA	NA	0.370229	0.395632	0.345018	0.409256	0.385644	NA	NA	NA	NA
SNRNP40	Q96DI7	U5 small nuclear ribonucleoprotein 40 kDa protein		grey	NA	NA	NA	NA	NA	NA	NA	NA	NA	NA	0.93102	0.926319	0.787361	0.54246
RBMXL1	Q96E39	RNA binding motif protein, X-linked-like-1		grey	NA	NA	NA	NA	NA	NA	NA	NA	NA	NA	0.893808	0.463116	0.222582	0.165464
DNAJA3	Q96EY1	DnaJ homolog subfamily A member 3, mitochondrial		grey	NA	NA	NA	0.517866	0.320209	0.367857	0.305724	NA	0.281103	0.407906	NA	NA	NA	NA
PTCD3	Q96EY7	Pentatricopeptide repeat domain-containing protein 3, mitochondrial		grey	NA	NA	NA	NA	NA	0.444944	0.373273	0.362054	NA	NA	NA	NA	NA	NA
DDX27	Q96GQ7	Probable ATP-dependent RNA helicase DDX27		grey	NA	NA	NA	NA	0.40417	0.369081	0.371658	0.642461	0.66525	0.603064	NA	0.86839	NA	0.217613
PGAM5	Q96HS1	Serine/threonine-protein phosphatase PGAM5, mitochondrial		grey	NA	NA	0.278645	0.653381	NA	0.372628	0.290247	NA	NA	NA	0.877102	0.845983	0.611666	0.329233
FUBP3	Q96I24	Far upstream element-binding protein 3		grey	NA	NA	NA	NA	NA	0.465392	0.504042	NA	0.613721	NA	NA	NA	NA	NA
ZFR	Q96KR1	Zinc finger RNA-binding protein		grey	NA	NA	NA	NA	NA	0.475707	0.499875	NA	0.482356	NA	NA	NA	NA	NA
ZNF512	Q96ME7	Zinc finger protein 512		grey	NA	NA	NA	NA	NA	0.400206	NA	NA	0.498563	0.457312	NA	NA	NA	NA
YTHDC1	Q96MU7	YTH domain-containing protein 1		grey	NA	NA	0.346781	0.686672	0.348335	0.283411	0.356735	NA	0.556954	NA	0.876838	0.718088	0.418885	0.18384
RPRD1A	Q96P16	Regulation of nuclear pre-mRNA domain-containing protein 1A		grey	NA	NA	NA	NA	NA	NA	NA	NA	NA	NA	0.828043	NA	0.460256	0.156424
IPO9	Q96P70	Importin-9		grey	NA	NA	NA	NA	0.473057	0.434175	0.42701	0.330378	0.348428	0.346994	NA	NA	NA	NA
RBM14	Q96PK6	RNA-binding protein 14		grey	NA	NA	0.355217	0.594506	0.713114	0.67855	0.75724	0.713146	0.750356	0.759048	0.622969	0.688386	0.467918	0.242172
FYTTD1	Q96QD9	UAP56-interacting factor		grey	NA	NA	NA	NA	NA	NA	NA	NA	NA	NA	0.916757	0.858311	0.713163	0.402853
WRNIP1	Q96S55	ATPase WRNIP1		grey	NA	NA	NA	NA	NA	NA	NA	NA	NA	0.532667	NA	NA	NA	NA
RBM15	Q96T37	Putative RNA-binding protein 15		grey	NA	NA	NA	NA	NA	NA	NA	NA	0.57076	NA	NA	NA	NA	NA
SPEN	Q96T58	Msx2-interacting protein		grey	NA	NA	NA	NA	0.158022	NA	NA	NA	NA	NA	0.934473	0.816227	0.617649	0.198217
MMS19	Q96T76	MMS19 nucleotide excision repair protein homolog		grey	NA	NA	NA	NA	NA	0.244074	0.256257	NA	0.312653	0.315551	NA	NA	NA	NA
CDC5L	Q99459	Cell division cycle 5-like protein		grey	NA	NA	NA	NA	NA	NA	0.440472	0.450338	NA	NA	0.886732	0.863721	0.743682	0.470594
PSMD1	Q99460	26S proteasome non-ATPase regulatory subunit 1		grey	NA	NA	NA	NA	0.55982	0.528458	0.48043	0.340034	0.378936	0.353073	NA	NA	NA	NA
EIF3CL, EIF3C	B5ME19, Q99613	Eukaryotic translation initiation factor 3 subunit C-like protein, Eukaryotic translation initiation factor 3 subunit C		grey	NA	NA	NA	NA	0.53883	0.570096	0.486141	0.432801	0.475732	0.418381	NA	NA	NA	NA
HNRNPDL	O14979	Heterogeneous nuclear ribonucleoprotein D-like		grey	NA	NA	NA	NA	NA	NA	NA	NA	NA	NA	0.490666	NA	0.179305	0.120005
PHB2	Q99623	Prohibitin-2		grey	NA	NA	0.46626	0.488544	0.60429	0.645088	0.532579	0.313154	0.338182	0.343319	NA	NA	NA	NA
ATXN2	Q99700	Ataxin-2		grey	NA	NA	0.32427	0.631572	0.421718	0.402924	0.378797	0.491811	0.588714	0.561346	NA	NA	NA	NA
HNRNPAB	Q99729	Heterogeneous nuclear ribonucleoprotein A/B		grey	NA	NA	NA	NA	0.553771	0.530362	NA	0.567249	0.588917	NA	0.88333	0.611952	0.285903	0.0953419
CCT7	Q99832	T-complex protein 1 subunit eta		grey	NA	NA	NA	NA	0.568928	0.646331	0.639276	0.297625	0.406169	0.353537	NA	NA	NA	NA
EBNA1BP2	Q99848	Probable rRNA-processing protein EBP2		grey	NA	NA	NA	NA	0.365168	0.373477	0.349454	0.710799	0.750487	0.748035	NA	NA	NA	NA
PRMT1	Q99873	Protein arginine N-methyltransferase 1		grey	NA	NA	NA	NA	NA	NA	NA	NA	NA	NA	0.904564	0.727015	0.44956	0.176975
XPO1	O14980	Exportin-1		grey	NA	NA	NA	0.535209	0.431815	0.439961	0.427046	0.316062	0.393991	0.416178	NA	NA	NA	NA
DDX50	Q9BQ39	ATP-dependent RNA helicase DDX50		grey	NA	NA	NA	NA	NA	0.33084	NA	NA	0.754336	NA	0.91866	NA	0.333502	0.227537
GRWD1	Q9BQ67	Glutamate-rich WD repeat-containing protein 1		grey	NA	NA	NA	NA	0.442378	0.505904	0.507171	0.504583	0.469977	0.429448	NA	NA	NA	0.706934
TCF25	Q9BQ70	Transcription factor 25		grey	NA	NA	NA	NA	NA	0.343091	NA	NA	0.355296	NA	NA	NA	NA	NA
WDR77	Q9BQA1	Methylosome protein 50		grey	NA	NA	0.353805	0.541709	NA	NA	0.545806	NA	0.385844	0.51856	0.950473	0.849834	0.582184	0.290926
TUBA1C	Q9BQE3	Tubulin alpha-1C chain		grey	NA	NA	NA	NA	NA	0.498498	0.471095	0.344159	0.416801	0.376726	NA	NA	NA	NA
MYBBP1A	Q9BQG0	Myb-binding protein 1A		grey	NA	NA	NA	NA	0.424593	0.416998	0.394494	0.55762	0.574269	NA	NA	0.520015	NA	0.369531
SRSF8	Q9BRL6	Serine/arginine-rich splicing factor 8		grey	NA	NA	NA	NA	NA	NA	NA	NA	NA	NA	NA	NA	0.342499	0.439977
NOL10	Q9BSC4	Nucleolar protein 10		grey	NA	NA	NA	NA	0.392511	0.444358	0.381888	NA	NA	0.578628	NA	NA	NA	NA
SEC16A	O15027	Protein transport protein Sec16A		grey	NA	NA	NA	NA	NA	0.375562	0.320661	NA	0.412677	0.333151	NA	NA	NA	NA
MMTAG2	Q9BU76	Multiple myeloma tumor-associated protein 2		grey	NA	NA	NA	NA	NA	NA	NA	NA	NA	NA	0.873474	0.774998	0.543733	0.292956
TUBB6	Q9BUF5	Tubulin beta-6 chain		grey	NA	NA	NA	NA	NA	0.55173	0.41629	0.291368	0.347944	0.32109	NA	NA	NA	NA
HNRNPUL1	Q9BUJ2	Heterogeneous nuclear ribonucleoprotein U-like protein 1		grey	NA	NA	NA	0.783355	0.459711	0.440453	0.422066	0.61762	0.594008	0.613736	0.881968	0.861521	0.708803	0.392574
U2SURP	O15042	U2 snRNP-associated SURP motif-containing protein		grey	NA	NA	NA	NA	NA	NA	NA	NA	NA	NA	0.58342	0.738712	0.50544	0.295948
TUBB2B	Q9BVA1	Tubulin beta-2B chain		grey	NA	NA	NA	NA	0.525234	0.552953	0.545909	0.355674	0.395822	0.371132	NA	NA	NA	NA
UTP14A	Q9BVJ6	U3 small nucleolar RNA-associated protein 14 homolog A		grey	NA	NA	NA	NA	0.446278	0.410864	0.407313	0.577667	0.695854	NA	NA	NA	NA	NA
GNL3	Q9BVP2	Guanine nucleotide-binding protein-like 3		grey	NA	NA	NA	NA	0.432981	0.386969	0.455685	NA	NA	NA	0.674786	0.712139	0.556875	0.249582
RBM4B, RBM4	Q9BQ04, Q9BWF3	RNA-binding protein 4B, RNA-binding protein 4		grey	NA	NA	NA	NA	NA	NA	NA	NA	0.727104	0.726102	NA	0.772116	0.693712	NA
SRRT	Q9BXP5	Serrate RNA effector molecule homolog		grey	NA	NA	NA	NA	NA	NA	0.260924	NA	NA	0.204955	NA	NA	NA	NA
ANKRD30B	Q9BXX2	Ankyrin repeat domain-containing protein 30B		grey	NA	NA	NA	NA	NA	NA	0.418202	NA	NA	NA	NA	NA	NA	NA
MAK16	Q9BXY0	Protein MAK16 homolog		grey	NA	NA	NA	NA	0.372699	0.373783	NA	NA	0.646043	0.735212	NA	NA	NA	NA
POLDIP3	Q9BY77	Polymerase delta-interacting protein 3		grey	NA	NA	NA	NA	NA	NA	NA	NA	NA	NA	NA	0.823537	0.462183	0.214306
NIFK	Q9BYG3	MKI67 FHA domain-interacting nucleolar phosphoprotein		grey	NA	NA	NA	NA	0.475132	0.45255	NA	0.720467	NA	NA	NA	NA	NA	NA
GTPBP4	Q9BZE4	Nucleolar GTP-binding protein 1		grey	NA	NA	NA	NA	0.436509	0.420058	0.412345	0.658166	0.704177	0.688163	0.511504	0.801193	0.748352	0.379803
CRNKL1	Q9BZJ0	Crooked neck-like protein 1		grey	NA	NA	NA	NA	NA	0.391709	NA	NA	NA	NA	0.896833	0.840797	0.755824	0.488198
WDR12	Q9GZL7	Ribosome biogenesis protein WDR12		grey	NA	NA	NA	NA	0.712006	0.482619	NA	NA	0.591887	0.637432	NA	NA	NA	0.4346
MKRN2	Q9H000	Probable E3 ubiquitin-protein ligase makorin-2		grey	NA	NA	NA	NA	0.245186	0.219865	0.176995	NA	0.543546	NA	0.918461	0.751374	0.455797	0.265705
CLPB	Q9H078	Caseinolytic peptidase B protein homolog		grey	NA	NA	NA	NA	0.350599	0.327713	0.302017	0.307685	0.2918	0.259117	NA	NA	NA	NA
NAT10	Q9H0A0	RNA cytidine acetyltransferase		grey	NA	NA	NA	NA	0.448057	0.447584	0.403202	0.657206	0.698786	0.682701	0.859879	0.768626	0.775311	0.496336
XRN2	Q9H0D6	5'-3' exoribonuclease 2		grey	NA	NA	NA	NA	0.422216	0.41613	0.476259	NA	0.570188	NA	NA	NA	NA	0.229287
DHX36	Q9H2U1	ATP-dependent RNA helicase DHX36		grey	NA	NA	NA	NA	NA	0.576917	NA	NA	0.502611	NA	NA	NA	NA	NA
PNN	Q9H307	Pinin		grey	NA	NA	0.351294	0.64353	0.472059	0.480336	0.468501	0.629698	0.642895	0.619743	0.910418	0.825526	0.566912	0.227005
WDR46	O15213	WD repeat-containing protein 46		grey	NA	NA	NA	NA	0.525527	0.474771	0.367537	NA	0.670532	0.521714	NA	NA	NA	NA
HEATR1	Q9H583	HEAT repeat-containing protein 1		grey	NA	NA	NA	0.636011	0.401302	0.400001	0.357818	0.519623	0.506441	0.511432	0.62492	0.91274	NA	0.361976
RPF2	Q9H7B2	Ribosome production factor 2 homolog		grey	NA	NA	NA	NA	0.378032	0.359639	0.361536	0.708063	0.726604	0.731053	0.907631	NA	NA	0.454925
TDRD3	Q9H7E2	Tudor domain-containing protein 3		grey	NA	NA	NA	NA	NA	NA	NA	NA	NA	NA	0.701501	NA	NA	NA
SCAF1	Q9H7N4	Splicing factor, arginine/serine-rich 19		grey	NA	NA	NA	NA	NA	NA	NA	NA	NA	NA	0.96649	0.863349	0.618437	0.278124
NKRF	O15226	NF-kappa-B-repressing factor		grey	NA	NA	NA	NA	0.449315	0.412601	NA	0.559471	0.533147	0.611771	0.680674	NA	NA	0.19587
NT5DC2	Q9H857	5'-nucleotidase domain-containing protein 2		grey	NA	NA	NA	NA	NA	0.37742	0.29004	NA	0.275252	0.263449	NA	NA	NA	NA
NOL11	Q9H8H0	Nucleolar protein 11		grey	NA	NA	NA	NA	0.460989	0.440112	0.430303	0.636734	0.632704	0.570631	0.755907	0.734276	0.635449	0.369598
SFXN1	Q9H9B4	Sideroflexin-1		grey	NA	NA	NA	NA	NA	0.508672	NA	NA	0.427161	0.338441	NA	NA	NA	NA
USP42	Q9H9J4	Ubiquitin carboxyl-terminal hydrolase 42		grey	NA	NA	NA	NA	NA	NA	NA	NA	NA	NA	NA	0.647453	0.365929	0.311518
CASC3	O15234	Protein CASC3		grey	NA	NA	NA	NA	0.173963	0.29632	0.282969	0.512409	0.535489	0.505685	NA	NA	0.799972	0.548655
CLK4	Q9HAZ1	Dual specificity protein kinase CLK4		grey	NA	NA	NA	NA	NA	NA	NA	NA	NA	NA	0.897383	0.526582	0.249401	0.13747
CACYBP	Q9HB71	Calcyclin-binding protein		grey	NA	NA	NA	0.597147	NA	NA	NA	0.273689	0.398786	0.330674	NA	NA	NA	NA
NCOA5	Q9HCD5	Nuclear receptor coactivator 5		grey	NA	NA	NA	NA	NA	NA	NA	NA	NA	NA	0.864633	0.744742	0.418581	0.138005
CWC22	Q9HCG8	Pre-mRNA-splicing factor CWC22 homolog		grey	NA	NA	NA	NA	NA	NA	NA	NA	NA	NA	0.800662	0.900874	0.820318	0.577881
XAB2	Q9HCS7	Pre-mRNA-splicing factor SYF1		grey	NA	NA	NA	NA	NA	NA	NA	NA	NA	NA	0.924368	0.88009	0.775235	0.524511
WDR6	Q9NNW5	WD repeat-containing protein 6		grey	NA	NA	NA	NA	0.427747	0.436499	0.365784	0.347041	0.350472	0.328462	0.831856	0.82534	0.676218	0.521187
SPTLC1	O15269	Serine palmitoyltransferase 1		grey	NA	NA	NA	NA	NA	0.269033	NA	NA	0.368878	0.35418	NA	NA	NA	NA
ALG13	Q9NP73	Putative bifunctional UDP-N-acetylglucosamine transferase and deubiquitinase ALG13		grey	NA	NA	NA	NA	NA	NA	NA	NA	NA	NA	0.587442	NA	NA	0.312781
PPAN-P2RY11, PPAN	A0A0B4J1V8, Q9NQ55	HCG2039996, Suppressor of SWI4 1 homolog		grey	NA	NA	NA	NA	NA	0.398022	NA	NA	0.657429	NA	0.986451	NA	NA	0.332403
UTP3	Q9NQZ2	Something about silencing protein 10		grey	NA	NA	NA	NA	0.444667	NA	NA	NA	0.726455	NA	NA	NA	NA	NA
DDX21	Q9NR30	Nucleolar RNA helicase 2		grey	0.48831	NA	NA	NA	0.47849	0.473413	0.433934	0.597877	0.571422	0.524036	0.881643	0.813245	0.641397	0.321321
APOBEC3C	Q9NRW3	DNA dC->dU-editing enzyme APOBEC-3C		grey	NA	NA	0.307561	NA	NA	NA	NA	NA	NA	NA	NA	NA	NA	NA
FARSB	Q9NSD9	Phenylalanine--tRNA ligase beta subunit		grey	NA	NA	NA	NA	NA	0.731702	NA	0.399893	0.454928	0.480336	NA	NA	NA	NA
IARS2	Q9NSE4	Isoleucine--tRNA ligase, mitochondrial		grey	NA	NA	NA	NA	NA	0.609954	0.531111	NA	0.328733	NA	NA	NA	NA	NA
SMC4	Q9NTJ3	Structural maintenance of chromosomes protein 4		grey	NA	NA	NA	NA	NA	NA	NA	0.419994	0.443638	0.42739	NA	NA	NA	NA
PPM1G	O15355	Protein phosphatase 1G		grey	NA	NA	NA	NA	NA	0.560053	0.478941	0.361337	0.400638	0.400555	NA	NA	NA	NA
STAU2	Q9NUL3	Double-stranded RNA-binding protein Staufen homolog 2		grey	NA	NA	NA	NA	NA	0.368691	0.37833	NA	0.547511	0.491575	NA	0.730109	NA	NA
DDX19A, DDX19B	Q9NUU7, Q9UMR2	ATP-dependent RNA helicase DDX19A, ATP-dependent RNA helicase DDX19B		grey	NA	NA	NA	NA	NA	NA	NA	NA	NA	0.537037	NA	NA	NA	NA
DCAF13	Q9NV06	DDB1- and CUL4-associated factor 13		grey	NA	NA	NA	NA	NA	0.442866	NA	NA	NA	NA	0.778177	NA	NA	NA
EIF3D	O15371	Eukaryotic translation initiation factor 3 subunit D		grey	NA	NA	NA	NA	0.467777	0.497447	0.403583	0.334943	0.366944	0.357454	NA	NA	NA	NA
ATAD3A	Q9NVI7	ATPase family AAA domain-containing protein 3A		grey	NA	NA	0.406141	NA	0.344284	0.366664	0.290931	0.325909	0.343509	0.324119	NA	NA	NA	NA
DDX18	Q9NVP1	ATP-dependent RNA helicase DDX18		grey	NA	NA	NA	NA	0.409727	0.406239	NA	0.744147	0.673203	NA	NA	NA	0.650044	0.390675
RBM28	Q9NW13	RNA-binding protein 28		grey	NA	NA	NA	NA	0.418405	0.367601	0.36986	0.536994	0.673693	0.637917	0.81688	NA	NA	0.202876
RBM22	Q9NW64	Pre-mRNA-splicing factor RBM22		grey	NA	NA	NA	NA	NA	NA	NA	NA	NA	NA	0.936241	0.87746	0.794699	0.561961
SLTM	Q9NWH9	SAFB-like transcription modulator		grey	NA	NA	NA	NA	NA	NA	NA	NA	NA	NA	0.853976	0.684632	0.414122	0.209699
AATF	Q9NY61	Protein AATF		grey	NA	NA	NA	NA	NA	0.410593	NA	NA	NA	NA	NA	NA	NA	NA
DDX56	Q9NY93	Probable ATP-dependent RNA helicase DDX56		grey	NA	NA	NA	NA	0.444808	0.423774	NA	NA	0.706891	NA	NA	NA	NA	NA
BCLAF1	Q9NYF8	Bcl-2-associated transcription factor 1		grey	NA	0.303067	0.329606	0.628082	0.123053	0.0857544	0.239254	0.22618	0.275772	NA	0.914449	0.808363	0.440853	0.134364
UTP6	Q9NYH9	U3 small nucleolar RNA-associated protein 6 homolog		grey	NA	NA	NA	NA	NA	0.428803	NA	NA	NA	NA	NA	NA	NA	NA
FAM120A	Q9NZB2	Constitutive coactivator of PPAR-gamma-like protein 1		grey	NA	NA	NA	NA	0.446841	0.475872	0.466382	0.527209	0.54665	0.537829	NA	NA	NA	NA
IGF2BP1	Q9NZI8	Insulin-like growth factor 2 mRNA-binding protein 1		grey	0.190021	0.25565	0.424295	0.67288	0.339101	0.314058	0.299352	0.564118	0.571092	0.55383	0.92054	0.860538	0.718413	0.466539
HACD3	Q9P035	Very-long-chain		grey	NA	NA	0.323048	0.602987	0.428235	0.469673	NA	0.307009	0.357066	0.33935	NA	NA	NA	NA
H2AFY2	Q9P0M6	Core histone macro-H2A.2		grey	NA	NA	NA	NA	NA	0.578415	NA	NA	NA	NA	NA	NA	NA	NA
PHRF1	Q9P1Y6	PHD and RING finger domain-containing protein 1		grey	NA	NA	NA	NA	NA	NA	NA	NA	NA	NA	0.948972	0.798777	0.495049	0.167548
RCC2	Q9P258	Protein RCC2		grey	NA	NA	NA	NA	NA	NA	NA	0.440556	0.43006	0.340865	NA	NA	NA	NA
LARS	Q9P2J5	Leucine--tRNA ligase, cytoplasmic		grey	NA	NA	NA	NA	0.482498	0.510092	0.471011	0.354222	0.403843	0.364256	NA	NA	NA	NA
ATXN10	Q9UBB4	Ataxin-10		grey	NA	NA	NA	NA	NA	NA	NA	NA	0.582673	NA	NA	NA	NA	NA
COPG2	Q9UBF2	Coatomer subunit gamma-2		grey	NA	NA	NA	NA	NA	NA	0.461172	NA	NA	NA	NA	NA	NA	NA
DHCR7	Q9UBM7	7-dehydrocholesterol reductase		grey	NA	NA	NA	NA	NA	NA	NA	NA	0.425152	0.433678	NA	NA	NA	NA
DNAJB11	Q9UBS4	DnaJ homolog subfamily B member 11		grey	NA	NA	NA	NA	0.308963	0.320116	NA	NA	0.469028	0.379268	NA	NA	NA	NA
NXF1	Q9UBU9	Nuclear RNA export factor 1		grey	NA	NA	NA	NA	NA	NA	NA	NA	NA	NA	NA	NA	NA	0.0972203
PARP2	Q9UGN5	Poly [ADP-ribose] polymerase 2		grey	0.136405	0.280954	0.264176	0.652661	0.901814	0.858865	0.638663	0.723917	0.856758	0.823147	NA	NA	NA	NA
MKRN1	Q9UHC7	E3 ubiquitin-protein ligase makorin-1		grey	NA	NA	NA	NA	0.25708	0.26118	0.201896	0.495904	0.572723	0.552813	NA	NA	NA	NA
DHX15	O43143	Pre-mRNA-splicing factor ATP-dependent RNA helicase DHX15		grey	NA	NA	NA	0.620544	0.42568	0.415594	0.444552	0.416106	0.43255	0.440653	0.867527	0.798521	0.610136	0.301822
TBK1	Q9UHD2	Serine/threonine-protein kinase TBK1		grey	NA	NA	NA	NA	NA	0.458229	0.290966	NA	NA	NA	NA	NA	NA	NA
PJA2	O43164	E3 ubiquitin-protein ligase Praja-2		grey	NA	NA	NA	NA	0.483151	0.442207	0.425079	NA	0.442704	0.471037	NA	NA	NA	NA
SLC25A13	Q9UJS0	Calcium-binding mitochondrial carrier protein Aralar2		grey	NA	NA	0.352332	0.603511	0.327636	0.386639	0.321132	0.348432	0.355587	0.351067	NA	NA	NA	NA
DDX41	Q9UJV9	Probable ATP-dependent RNA helicase DDX41		grey	NA	NA	NA	NA	NA	NA	NA	NA	NA	NA	0.732728	0.696951	0.697208	0.390415
STOML2	Q9UJZ1	Stomatin-like protein 2, mitochondrial		grey	NA	NA	NA	NA	NA	0.483225	0.441675	0.324311	0.330517	0.32197	NA	NA	NA	NA
FAM208A	Q9UK61	Protein TASOR		grey	NA	NA	NA	NA	NA	NA	NA	NA	NA	NA	0.804232	0.604743	NA	NA
MRTO4	Q9UKD2	mRNA turnover protein 4 homolog		grey	NA	NA	NA	NA	0.366692	0.347697	0.327966	0.600176	0.721091	0.737891	0.806179	NA	NA	NA
RALY	Q9UKM9	RNA-binding protein Raly		grey	0.209142	0.336247	0.356731	0.615874	0.705319	0.604243	0.693233	0.777763	0.783601	0.792866	0.951378	0.906538	0.730908	0.483033
ACIN1	Q9UKV3	Apoptotic chromatin condensation inducer in the nucleus		grey	NA	NA	0.403647	0.581159	0.421845	0.408686	0.464737	0.595469	0.597148	0.667487	0.97718	0.658831	0.315378	0.0926825
ISY1	Q9ULR0	Pre-mRNA-splicing factor ISY1 homolog		grey	NA	NA	NA	NA	NA	NA	NA	NA	NA	NA	0.0816294	NA	0.683844	0.492695
CIZ1	Q9ULV3	Cip1-interacting zinc finger protein		grey	NA	NA	NA	NA	NA	NA	NA	NA	NA	NA	NA	NA	0.713295	0.391161
CORO1C	Q9ULV4	Coronin-1C		grey	NA	NA	NA	NA	NA	NA	NA	NA	0.387795	0.369017	NA	NA	NA	NA
AKAP8L	Q9ULX6	A-kinase anchor protein 8-like		grey	NA	0.291664	NA	NA	0.357562	0.354447	0.31742	0.342775	0.381307	0.370226	NA	NA	NA	NA
PRPF4	O43172	U4/U6 small nuclear ribonucleoprotein Prp4		grey	NA	NA	NA	NA	NA	NA	NA	NA	NA	NA	0.595109	0.912937	0.598635	NA
PRPF19	Q9UMS4	Pre-mRNA-processing factor 19		grey	NA	NA	0.45408	0.623014	0.425987	0.489348	0.435675	0.458623	0.469479	0.452957	0.913345	0.900938	0.790896	0.516301
G3BP2	Q9UN86	Ras GTPase-activating protein-binding protein 2		grey	NA	NA	NA	NA	NA	0.465401	NA	NA	0.47281	0.489238	NA	NA	NA	NA
MAGED2	Q9UNF1	Melanoma-associated antigen D2		grey	NA	NA	NA	NA	NA	0.510955	0.498644	0.385617	0.329318	0.377149	NA	NA	NA	NA
PHGDH	O43175	D-3-phosphoglycerate dehydrogenase		grey	NA	0.253235	0.436816	0.577387	0.680061	0.663107	0.645943	0.430537	0.46441	0.441964	0.966621	NA	NA	NA
WDR3	Q9UNX4	WD repeat-containing protein 3		grey	NA	NA	0.546341	0.604084	0.488022	0.443768	0.452169	0.656204	0.681112	0.726813	NA	0.872046	NA	0.425997
PPP6R1	Q9UPN7	Serine/threonine-protein phosphatase 6 regulatory subunit 1		grey	NA	NA	NA	NA	0.356661	0.350312	0.328548	NA	0.313258	0.361699	NA	NA	NA	NA
TNRC6B	Q9UPQ9	Trinucleotide repeat-containing gene 6B protein		grey	NA	NA	NA	NA	NA	0.514257	0.501719	NA	0.563376	NA	NA	NA	NA	NA
DICER1	Q9UPY3	Endoribonuclease Dicer		grey	NA	NA	NA	NA	0.258848	0.319469	0.304261	0.467155	0.492342	NA	NA	NA	NA	NA
SRRM2	Q9UQ35	Serine/arginine repetitive matrix protein 2		grey	NA	NA	NA	NA	NA	NA	NA	NA	NA	NA	0.73942	0.856281	0.634195	0.29077
PSMD3	O43242	26S proteasome non-ATPase regulatory subunit 3		grey	NA	NA	NA	0.540281	0.589052	0.550542	0.552613	0.415884	0.450368	0.420229	NA	NA	NA	NA
PA2G4	Q9UQ80	Proliferation-associated protein 2G4		grey	NA	NA	NA	NA	NA	0.664125	0.646681	0.391083	0.42455	0.411113	NA	NA	NA	NA
SMC3	Q9UQE7	Structural maintenance of chromosomes protein 3		grey	NA	NA	NA	NA	0.309988	0.374261	0.361577	0.403323	0.361316	0.395025	NA	NA	NA	NA
RUVBL2	Q9Y230	RuvB-like 2		grey	NA	NA	0.344859	NA	0.586794	0.558596	0.617445	0.370848	0.424093	0.410405	NA	NA	NA	NA
EIF3L	Q9Y262	Eukaryotic translation initiation factor 3 subunit L		grey	NA	NA	NA	NA	0.67922	0.671765	0.717107	0.418415	0.470008	0.454901	NA	NA	NA	NA
RUVBL1	Q9Y265	RuvB-like 1		grey	NA	NA	0.351424	0.568282	0.569892	0.567306	0.52467	0.402393	0.43453	0.378967	NA	NA	NA	NA
VDAC3	Q9Y277	Voltage-dependent anion-selective channel protein 3		grey	NA	NA	NA	NA	NA	NA	NA	NA	0.362879	0.372573	NA	NA	NA	NA
FARSA	Q9Y285	Phenylalanine--tRNA ligase alpha subunit		grey	NA	NA	NA	NA	NA	NA	NA	NA	0.621054	NA	NA	NA	NA	NA
STK38L	Q9Y2H1	Serine/threonine-protein kinase 38-like		grey	NA	NA	NA	NA	NA	NA	NA	NA	NA	NA	0.881183	0.656617	0.221354	0.176663
DIS3	Q9Y2L1	Exosome complex exonuclease RRP44		grey	NA	NA	NA	NA	NA	NA	NA	0.334332	0.468487	0.49953	NA	NA	NA	NA
RCL1	Q9Y2P8	RNA 3'-terminal phosphate cyclase-like protein		grey	NA	NA	NA	NA	NA	0.504926	NA	0.738862	NA	NA	NA	NA	NA	NA
THRAP3	Q9Y2W1	Thyroid hormone receptor-associated protein 3		grey	0.175774	0.21114	0.350084	0.60477	0.159643	0.0985062	0.243158	0.261742	0.25989	0.373579	0.976099	0.828332	0.449482	0.13674
NOP58	Q9Y2X3	Nucleolar protein 58		grey	NA	NA	0.51967	NA	0.423764	0.397605	0.395423	0.610577	0.5946	0.574938	0.918434	0.853177	0.674754	0.37956
LUC7L2	Q9Y383	Putative RNA-binding protein Luc7-like 2		grey	NA	NA	NA	NA	NA	0.355413	NA	NA	NA	NA	NA	NA	NA	0.251906
RBMX2	Q9Y388	RNA-binding motif protein, X-linked 2		grey	NA	NA	NA	NA	NA	NA	NA	NA	NA	NA	NA	NA	NA	0.267533
PPIL1	Q9Y3C6	Peptidyl-prolyl cis-trans isomerase-like 1		grey	NA	NA	NA	NA	NA	NA	NA	NA	NA	NA	0.67921	NA	NA	NA
STRAP	Q9Y3F4	Serine-threonine kinase receptor-associated protein		grey	NA	NA	NA	NA	0.609802	0.641526	0.645629	0.447804	0.494883	0.457312	NA	NA	NA	NA
RTCB	Q9Y3I0	tRNA-splicing ligase RtcB homolog		grey	NA	NA	NA	NA	NA	NA	NA	NA	0.429764	NA	NA	NA	NA	NA
NOC2L	Q9Y3T9	Nucleolar complex protein 2 homolog		grey	NA	NA	NA	NA	0.408693	0.421249	0.417083	0.543733	0.553292	0.365369	NA	NA	NA	NA
RPL36	Q9Y3U8	60S ribosomal protein L36		grey	NA	NA	NA	NA	0.357702	0.337586	0.342965	0.680909	0.654398	0.767436	0.912679	0.85896	0.770215	0.439685
CCDC9	Q9Y3X0	Coiled-coil domain-containing protein 9		grey	NA	NA	NA	NA	NA	NA	NA	NA	NA	NA	0.908369	0.820451	0.571018	0.18723
CHTOP	Q9Y3Y2	Chromatin target of PRMT1 protein		grey	NA	NA	NA	NA	NA	NA	NA	NA	NA	NA	0.907304	0.842661	0.636813	0.260645
TBL2	Q9Y4P3	Transducin beta-like protein 2		grey	NA	NA	NA	NA	NA	0.799876	0.637168	NA	0.597018	0.576755	NA	NA	NA	NA
LAS1L	Q9Y4W2	Ribosomal biogenesis protein LAS1L		grey	NA	NA	NA	NA	0.402221	0.369733	0.346845	0.398475	0.416236	0.379641	NA	NA	NA	NA
HNRNPR	O43390	Heterogeneous nuclear ribonucleoprotein R		grey	0.683634	NA	NA	NA	NA	0.574721	0.611741	0.508334	0.600607	0.633041	0.880722	0.673832	0.392625	0.187368
YTHDF2	Q9Y5A9	YTH domain-containing family protein 2		grey	NA	NA	0.343474	0.568188	0.350054	0.40928	0.323195	0.37468	0.392736	0.417178	NA	NA	0.674384	NA
SUPT16H	Q9Y5B9	FACT complex subunit SPT16		grey	0.248041	0.119014	0.316459	0.579398	0.568221	0.58173	0.590784	0.546547	0.553192	0.559452	0.784729	0.646868	0.529434	NA
UTP18	Q9Y5J1	U3 small nucleolar RNA-associated protein 18 homolog		grey	NA	NA	NA	NA	0.493691	0.50831	0.486278	0.634596	0.717801	0.657064	NA	NA	NA	NA
SRPRB	Q9Y5M8	Signal recognition particle receptor subunit beta		grey	NA	NA	NA	NA	NA	0.673171	0.685208	0.61156	0.553392	NA	NA	NA	NA	NA
GTF3C3	Q9Y5Q9	General transcription factor 3C polypeptide 3		grey	NA	NA	NA	NA	0.340265	0.371966	0.301261	NA	0.355305	0.358469	NA	NA	NA	NA
RBM8A	Q9Y5S9	RNA-binding protein 8A		grey	NA	NA	0.723314	0.857964	0.426342	0.379956	NA	0.603992	0.595878	0.616829	0.94101	0.902785	0.746489	0.508889
MAGED1	Q9Y5V3	Melanoma-associated antigen D1		grey	NA	NA	NA	NA	0.452004	0.43438	0.426875	0.31809	0.437605	0.346008	NA	NA	NA	NA
SPIN1	Q9Y657	Spindlin-1		grey	NA	NA	NA	NA	NA	NA	NA	NA	NA	NA	NA	0.719833	NA	0.286718
MRPS18B	Q9Y676	28S ribosomal protein S18b, mitochondrial		grey	NA	NA	NA	NA	NA	NA	0.625314	NA	NA	NA	NA	NA	NA	NA
COPG1	Q9Y678	Coatomer subunit gamma-1		grey	NA	NA	NA	NA	NA	0.635675	NA	NA	0.463732	0.431934	NA	NA	NA	NA
MTCH2	Q9Y6C9	Mitochondrial carrier homolog 2		grey	NA	NA	NA	NA	NA	NA	NA	NA	0.376656	0.440221	NA	NA	NA	NA
DYNC1LI1	Q9Y6G9	Cytoplasmic dynein 1 light intermediate chain 1		grey	NA	NA	NA	NA	NA	0.378701	0.294776	NA	0.382419	0.346679	NA	NA	NA	NA
IGF2BP2	Q9Y6M1	Insulin-like growth factor 2 mRNA-binding protein 2		grey	NA	NA	NA	NA	0.318388	0.335195	0.356789	0.501321	0.518583	0.516628	0.383606	0.811743	0.773602	0.505758
EPB41L2	O43491	Band 4.1-like protein 2		grey	NA	NA	NA	NA	NA	0.555575	0.548186	0.325714	0.399764	0.325004	NA	NA	NA	NA
XPOT	O43592	Exportin-T		grey	NA	NA	NA	NA	0.40016	0.4423	0.391635	0.399987	0.408872	0.460387	NA	NA	NA	NA
PLRG1	O43660	Pleiotropic regulator 1		grey	NA	NA	NA	NA	NA	NA	NA	NA	NA	0.444953	0.88717	0.866995	0.739448	0.494032
BUB3	O43684	Mitotic checkpoint protein BUB3		grey	NA	NA	NA	NA	NA	NA	NA	NA	0.431243	NA	NA	NA	NA	NA
ACTN4	O43707	Alpha-actinin-4		grey	NA	NA	NA	NA	0.615946	0.58971	0.576917	0.367077	0.395025	0.380621	NA	NA	NA	NA
NARS	O43776	Asparagine--tRNA ligase, cytoplasmic		grey	NA	NA	NA	NA	NA	NA	NA	0.400753	0.514445	0.420276	NA	NA	NA	NA
MYO1B	O43795	Unconventional myosin-Ib		grey	NA	NA	NA	NA	NA	NA	NA	NA	0.300763	0.31387	NA	NA	NA	NA
RRP9	O43818	U3 small nucleolar RNA-interacting protein 2		grey	NA	NA	NA	NA	0.422863	0.340474	0.290549	0.659145	NA	NA	0.767263	0.741542	0.807544	0.433851
SCO2	O43819	Protein SCO2 homolog, mitochondrial		grey	NA	NA	NA	NA	NA	NA	0.391072	NA	NA	0.408868	NA	NA	NA	NA
CALU	O43852	Calumenin		grey	0.212406	0.261499	0.301866	0.597215	0.227978	0.217295	0.181194	0.236927	0.249773	0.236868	NA	NA	NA	NA
RAD21	O60216	Double-strand-break repair protein rad21 homolog		grey	NA	NA	NA	NA	0.330284	0.443712	0.339847	0.46994	0.364829	0.407126	NA	NA	NA	NA
AQR	O60306	Intron-binding protein aquarius		grey	NA	NA	NA	NA	NA	NA	NA	NA	NA	NA	0.879992	0.90181	0.796855	0.496288
MCM3AP	O60318	Germinal-center associated nuclear protein		grey	NA	NA	NA	NA	NA	0.380878	0.313889	NA	0.355649	0.343746	NA	NA	NA	NA
SYNCRIP	O60506	Heterogeneous nuclear ribonucleoprotein Q		grey	NA	NA	NA	NA	0.531418	NA	NA	NA	0.536071	NA	NA	NA	NA	NA
CDC40	O60508	Pre-mRNA-processing factor 17		grey	NA	NA	NA	NA	NA	NA	NA	NA	NA	NA	0.920395	0.879987	0.758296	0.499394
USO1	O60763	General vesicular transport factor p115		grey	NA	NA	NA	NA	NA	NA	NA	NA	0.452945	NA	NA	NA	NA	NA
HIST1H2BK, H2BFS, HIST1H2BD, HIST1H2BC, HIST2H2BF, HIST1H2BH, HIST1H2BA, HIST1H2BN, HIST1H2BM, HIST1H2BL	O60814, P57053, P58876, P62807, Q5QNW6, Q93079, Q96A08, Q99877, Q99879, Q99880	Histone H2B type 1-K, Histone H2B type F-S, Histone H2B type 1-D, Histone H2B type 1-C/E/F/G/I, Histone H2B type 2-F, Histone H2B type 1-H, Histone H2B type 1-A, Histone H2B type 1-N, Histone H2B type 1-M, Histone H2B type 1-L		grey	0.341854	0.183197	0.481045	0.57047	0.577435	0.575101	0.575173	0.691929	0.711899	0.724904	0.903379	0.835659	0.678911	0.379868
DKC1	O60832	H/ACA ribonucleoprotein complex subunit 4		grey	NA	NA	NA	NA	0.387127	0.338707	0.400472	0.571954	0.6312	NA	0.859938	0.795885	0.761051	0.395781
DNAJA2	O60884	DnaJ homolog subfamily A member 2		grey	0.113774	0.245507	0.299573	0.604847	0.344636	0.329884	0.302183	0.30133	0.340765	0.305536	NA	NA	NA	NA
WDR1	O75083	WD repeat-containing protein 1		grey	NA	NA	NA	NA	NA	NA	NA	NA	0.387952	0.333422	NA	NA	NA	NA
ZC3H11A	O75152	Zinc finger CCCH domain-containing protein 11A		grey	NA	NA	NA	NA	0.322057	0.201221	0.293581	0.582045	0.665619	NA	0.886005	0.754667	0.436518	0.128616
DNAJB6	O75190	DnaJ homolog subfamily B member 6		grey	NA	NA	NA	NA	NA	NA	NA	NA	0.292756	0.275347	NA	NA	NA	NA
H2AFY	O75367	Core histone macro-H2A.1		grey	NA	0.24739	0.382491	0.620067	0.560941	0.60633	0.59065	0.634877	0.661762	0.654087	0.895234	0.8782	0.671161	0.463982
FLNB	O75369	Filamin-B		grey	NA	NA	NA	NA	0.574378	0.587935	0.497412	0.398163	0.399244	0.398232	NA	NA	NA	NA
CS	O75390	Citrate synthase, mitochondrial		grey	NA	NA	NA	NA	NA	NA	NA	0.346862	0.419158	0.406489	NA	NA	NA	NA
SRSF10	O75494	Serine/arginine-rich splicing factor 10		grey	NA	NA	0.431172	0.709104	0.267244	0.222685	0.344426	0.665854	0.745599	NA	0.976445	0.879992	0.656062	0.288307
GMNN	O75496	Geminin		grey	0.0701091	0.20247	0.308609	0.62128	0.172952	0.176582	0.147085	0.356371	0.421771	0.364619	0.571312	0.77688	NA	NA
SF3B1	O75533	Splicing factor 3B subunit 1		grey	NA	NA	NA	0.599452	0.353512	0.429715	0.362497	0.43701	0.447971	0.453373	0.909918	0.882853	0.7717	0.544295
PRKRA	O75569	Interferon-inducible double-stranded RNA-dependent protein kinase activator A		grey	NA	NA	NA	NA	NA	NA	NA	NA	NA	NA	NA	0.790747	0.639198	0.390534
SNRNP200	O75643	U5 small nuclear ribonucleoprotein 200 kDa helicase		grey	NA	NA	0.450724	0.681408	0.465935	0.471777	0.473052	0.497295	0.491205	0.487568	0.910603	0.886215	0.763582	0.553232
NUP155	O75694	Nuclear pore complex protein Nup155		grey	NA	NA	NA	NA	NA	0.489056	0.411879	0.365341	0.323126	0.338786	NA	NA	NA	NA
BCAS2	O75934	Pre-mRNA-splicing factor SPF27		grey	NA	NA	NA	NA	NA	NA	NA	NA	NA	NA	0.802563	NA	NA	NA
RSL1D1	O76021	Ribosomal L1 domain-containing protein 1		grey	NA	NA	NA	NA	0.445332	0.396226	0.377664	0.631255	0.605211	NA	NA	0.820312	0.596693	0.334327
FARP2	O94887	FERM, RhoGEF and pleckstrin domain-containing protein 2		grey	NA	NA	NA	NA	0.301929	0.222214	0.29372	NA	0.304067	0.217344	NA	NA	NA	NA
ERLIN1, ERLIN2	O75477, O94905	Erlin-1, Erlin-2		grey	NA	NA	NA	NA	NA	NA	0.503673	NA	0.359052	0.328832	NA	NA	NA	NA
PRPF6	O94906	Pre-mRNA-processing factor 6		grey	NA	NA	NA	NA	NA	NA	NA	NA	NA	NA	0.830218	0.81179	0.691805	0.538426
UBR5	O95071	E3 ubiquitin-protein ligase UBR5		grey	NA	NA	NA	NA	NA	0.368132	NA	NA	NA	NA	NA	NA	NA	NA
IKBKAP	O95163	Elongator complex protein 1		grey	NA	NA	NA	NA	NA	0.513973	NA	NA	0.421283	0.366194	NA	NA	NA	NA
LUC7L3	O95232	Luc7-like protein 3		grey	NA	NA	NA	NA	NA	NA	NA	NA	NA	NA	0.751275	0.675914	NA	NA
SMC2	O95347	Structural maintenance of chromosomes protein 2		grey	NA	NA	NA	NA	NA	NA	NA	0.459313	NA	0.418104	NA	NA	NA	NA
SLU7	O95391	Pre-mRNA-splicing factor SLU7		grey	NA	NA	NA	NA	NA	NA	NA	NA	NA	NA	NA	0.798635	0.647763	NA
HSPA4L	O95757	Heat shock 70 kDa protein 4L		grey	NA	NA	NA	NA	NA	NA	NA	NA	0.386232	0.359861	NA	NA	NA	NA
BAG2	O95816	BAG family molecular chaperone regulator 2		grey	NA	NA	0.345091	0.57022	0.254882	0.306677	0.263482	0.250919	0.288671	0.296918	NA	NA	NA	NA
AIFM1	O95831	Apoptosis-inducing factor 1, mitochondrial		grey	0.232199	0.193002	0.321988	0.560334	0.348029	0.369177	0.326758	0.304217	0.345413	0.312871	NA	NA	NA	NA
LDHA	P00338	L-lactate dehydrogenase A chain		grey	NA	NA	0.443709	0.541844	0.670836	0.708591	0.677991	0.384449	0.3985	0.386477	NA	NA	NA	NA
GLUD1, GLUD2	P00367, P49448	Glutamate dehydrogenase 1, mitochondrial, Glutamate dehydrogenase 2, mitochondrial		grey	NA	NA	NA	NA	0.536286	0.556108	0.543858	0.283437	0.36578	0.324375	NA	NA	NA	NA
MT-CO2	P00403	Cytochrome c oxidase subunit 2		grey	NA	NA	NA	0.493145	NA	0.400821	NA	0.340291	0.310078	NA	NA	NA	NA	NA
HPRT1	P00492	Hypoxanthine-guanine phosphoribosyltransferase		grey	NA	NA	NA	NA	NA	0.64688	NA	NA	0.411443	0.383074	NA	NA	NA	NA
GOT2	P00505	Aspartate aminotransferase, mitochondrial		grey	NA	NA	NA	NA	NA	NA	NA	NA	0.448367	0.32346	NA	NA	NA	NA
PGK1	P00558	Phosphoglycerate kinase 1		grey	NA	NA	NA	NA	NA	NA	0.542334	NA	0.455945	0.405105	NA	NA	NA	NA
LMNA	P02545	Prelamin-A/C [Cleaved into: Lamin-A/C		grey	NA	NA	NA	NA	NA	0.310088	0.309459	0.313456	0.395818	0.353755	NA	NA	NA	NA
TFRC	P02786	Transferrin receptor protein 1		grey	NA	NA	NA	NA	NA	NA	NA	0.161707	0.260618	0.254127	NA	NA	NA	NA
ALDOA	P04075	Fructose-bisphosphate aldolase A		grey	NA	NA	NA	NA	0.755382	0.697712	0.701564	0.348712	0.399641	0.374844	NA	NA	NA	NA
TUBB4A	P04350	Tubulin beta-4A chain		grey	NA	NA	NA	NA	NA	0.546917	NA	NA	0.383382	0.389156	NA	NA	NA	NA
GAPDH	P04406	Glyceraldehyde-3-phosphate dehydrogenase		grey	0.445141	0.371789	0.436965	0.582951	0.634877	0.673533	0.627824	0.387859	0.406718	0.377734	0.557444	0.584924	0.29509	0.150988
TP53	P04637	Cellular tumor antigen p53		grey	NA	NA	0.239046	0.688544	0.419627	0.403747	0.554962	0.458039	0.535661	NA	NA	NA	NA	NA
HSPB1	P04792	Heat shock protein beta-1		grey	NA	NA	NA	NA	NA	NA	NA	NA	0.521119	NA	NA	NA	NA	NA
RPN1	P04843	Dolichyl-diphosphooligosaccharide--protein glycosyltransferase subunit 1		grey	0.376107	0.241955	0.403309	0.545667	0.471559	0.534776	0.477236	0.332265	0.344176	0.319098	NA	NA	NA	NA
RPN2	P04844	Dolichyl-diphosphooligosaccharide--protein glycosyltransferase subunit 2		grey	NA	NA	NA	NA	0.481102	0.535122	0.560691	0.340822	0.368392	0.367409	NA	NA	NA	NA
ATP1A1	P05023	Sodium/potassium-transporting ATPase subunit alpha-1		grey	0.200448	NA	0.337384	0.55481	0.367561	0.402539	0.350498	0.274884	0.319144	0.292651	NA	NA	NA	NA
SLC25A5	P05141	ADP/ATP translocase 2		grey	0.28656	0.278637	0.3615	0.560042	0.375277	0.41809	0.365402	0.321219	0.363005	0.354381	0.902027	0.871619	0.695512	0.37299
RPLP1	P05386	60S acidic ribosomal protein P1		grey	NA	NA	NA	NA	0.253057	0.267217	0.251827	NA	0.574486	NA	NA	NA	NA	NA
RPLP2	P05387	60S acidic ribosomal protein P2		grey	NA	NA	NA	NA	0.249514	0.288884	0.44285	0.56173	NA	NA	NA	NA	NA	NA
RPLP0, RPLP0P6	P05388, Q8NHW5	60S acidic ribosomal protein P0, 60S acidic ribosomal protein P0-like		grey	0.28055	0.47288	0.698113	0.843369	0.337173	0.326948	0.336769	0.607289	0.612538	0.61883	0.910953	0.866273	0.751386	0.47533
SSB	P05455	Lupus La protein		grey	NA	NA	NA	NA	0.452721	0.346768	NA	0.564972	NA	NA	NA	NA	NA	NA
CDK1	P06493	Cyclin-dependent kinase 1		grey	NA	NA	NA	NA	NA	NA	0.747978	NA	NA	0.526313	NA	NA	NA	NA
ATP5B	P06576	ATP synthase subunit beta, mitochondrial		grey	0.715836	NA	0.458681	0.472925	0.592086	0.610304	0.529057	0.355907	0.380778	0.368587	NA	NA	NA	NA
ENO1	P06733	Alpha-enolase		grey	0.618946	0.281215	0.429793	NA	0.686245	0.644798	0.662105	0.386774	0.431149	0.402618	0.660982	NA	NA	NA
PYGL	P06737	Glycogen phosphorylase, liver form		grey	NA	NA	NA	NA	0.595371	0.322098	0.637773	0.354776	0.384642	0.344249	NA	NA	NA	NA
GPI	P06744	Glucose-6-phosphate isomerase		grey	NA	NA	NA	NA	NA	NA	0.67857	0.349009	0.427534	0.41308	NA	NA	NA	NA
NPM1	P06748	Nucleophosmin		grey	0.8055	NA	0.384085	0.615669	0.501719	0.506441	0.498035	0.514869	0.537978	0.531923	NA	NA	NA	NA
LDHB	P07195	L-lactate dehydrogenase B chain		grey	NA	NA	NA	0.455249	0.676647	0.690249	0.667454	0.377428	0.410096	0.389417	NA	NA	NA	0.249919
NEFL	P07196	Neurofilament light polypeptide		grey	NA	NA	NA	NA	0.278213	0.215138	0.24534	NA	0.367733	0.251811	NA	NA	NA	NA
NEFM	P07197	Neurofilament medium polypeptide		grey	NA	NA	NA	NA	NA	NA	0.221996	NA	0.316935	0.153847	NA	NA	NA	NA
P4HB	P07237	Protein disulfide-isomerase		grey	NA	NA	NA	NA	NA	NA	0.531418	0.366632	0.380318	0.33308	NA	NA	NA	NA
ANXA2P2, ANXA2	A6NMY6, P07355	Putative annexin A2-like protein, Annexin A2		grey	NA	NA	NA	0.833375	0.276798	NA	NA	NA	0.403633	NA	NA	NA	NA	NA
PFN1	P07737	Profilin-1		grey	NA	NA	NA	NA	NA	NA	NA	0.369888	0.450893	NA	NA	NA	NA	NA
EPRS	P07814	Bifunctional glutamate/proline--tRNA ligase		grey	NA	NA	NA	NA	0.498963	0.490638	0.473637	0.363698	0.405473	0.384532	NA	NA	NA	NA
HNRNPC	P07910	Heterogeneous nuclear ribonucleoproteins C1/C2		grey	0.115756	0.257149	0.303534	0.647534	0.772624	0.75086	0.810814	0.792553	0.800987	0.826344	0.921192	0.874729	0.729188	0.425125
SLC3A2	P08195	4F2 cell-surface antigen heavy chain		grey	NA	NA	NA	0.565026	0.517956	0.445983	0.586503	0.339092	0.335425	0.339795	NA	NA	NA	NA
ASNS	P08243	Asparagine synthetase [glutamine-hydrolyzing]		grey	NA	NA	NA	NA	NA	0.65279	NA	NA	0.398576	0.378928	NA	NA	NA	NA
SNRPB2	P08579	U2 small nuclear ribonucleoprotein B''		grey	NA	NA	NA	NA	NA	NA	NA	NA	NA	NA	0.904958	0.843891	0.743135	0.551127
SNRNP70	P08621	U1 small nuclear ribonucleoprotein 70 kDa		grey	NA	NA	NA	NA	0.293366	0.286301	0.276777	0.461442	0.538958	0.513098	0.998242	0.867938	0.638349	0.299003
VIM	P08670	Vimentin		grey	0.774322	0.650297	0.4493	0.517154	0.434402	0.444256	0.415068	0.385368	0.447441	0.418571	0.916646	0.840833	0.678446	0.397485
GNAI3	P08754	Guanine nucleotide-binding protein G(k) subunit alpha		grey	NA	NA	NA	NA	NA	NA	NA	NA	0.346811	0.346679	NA	NA	NA	NA
RPSA	P08865	40S ribosomal protein SA		grey	NA	NA	0.442931	NA	0.599936	0.596204	0.550925	0.476325	0.496681	0.443018	0.745832	0.898783	0.785739	0.481753
SNRPA	P09012	U1 small nuclear ribonucleoprotein A		grey	NA	NA	NA	NA	NA	NA	NA	NA	NA	NA	NA	0.850057	NA	0.35062
HNRNPA1, HNRNPA1L2	P09651, Q32P51	Heterogeneous nuclear ribonucleoprotein A1, Heterogeneous nuclear ribonucleoprotein A1-like 2		grey	0.803006	NA	0.441989	NA	0.529301	0.492813	0.515785	0.603505	0.588951	0.569929	0.690422	0.593298	0.337836	0.0920152
SNRPA1	P09661	U2 small nuclear ribonucleoprotein A'		grey	NA	NA	NA	NA	NA	NA	NA	NA	NA	NA	0.865492	0.890192	0.823664	0.591903
LTA4H	P09960	Leukotriene A-4 hydrolase		grey	NA	NA	NA	NA	NA	NA	NA	0.44763	0.466217	0.373367	NA	NA	NA	NA
H2AFZ, H2AFV	P0C0S5, Q71UI9	Histone H2A.Z, Histone H2A.V		grey	NA	NA	0.3949	0.579996	NA	0.561519	NA	0.659771	NA	NA	NA	NA	0.662071	0.434977
HIST1H2AG, HIST1H2AD, HIST1H2AH, HIST1H2AJ, H2AFJ	A0A0U1RRH7, P0C0S8, P20671, Q96KK5, Q99878, Q9BTM1	Histone H2A, Histone H2A type 1, Histone H2A type 1-D, Histone H2A type 1-H, Histone H2A type 1-J, Histone H2A.J		grey	0.324397	0.243137	0.4092	0.640332	0.567885	0.566631	0.588223	0.691938	0.72874	0.740805	0.941921	0.827634	0.661945	0.359352
U2AF1L5, U2AF1	P0DN76, Q01081	Splicing factor U2AF 35 kDa subunit-like protein, Splicing factor U2AF 35 kDa subunit		grey	NA	NA	NA	NA	0.653175	0.684821	0.674087	NA	0.675998	0.629616	NA	NA	NA	NA
DLAT	P10515	Dihydrolipoyllysine-residue acetyltransferase component of pyruvate dehydrogenase complex, mitochondrial		grey	NA	NA	NA	NA	NA	NA	NA	NA	NA	0.270313	NA	NA	NA	NA
PRKAR1A	P10644	cAMP-dependent protein kinase type I-alpha regulatory subunit		grey	NA	NA	NA	NA	NA	0.266297	NA	NA	0.300411	0.2901	NA	NA	NA	NA
HSPD1	P10809	60 kDa heat shock protein, mitochondrial		grey	0.454649	0.185673	0.388117	0.545164	0.272463	0.296003	0.250914	0.2653	0.309435	0.285668	0.808528	0.678332	NA	0.14651
HSPA5	P11021	78 kDa glucose-regulated protein		grey	0.333067	0.237801	0.361169	0.582272	0.316627	0.323831	0.277838	0.283878	0.289642	0.277002	0.810764	0.764855	0.544295	0.224241
ACADM	P11310	Medium-chain specific acyl-CoA dehydrogenase, mitochondrial		grey	NA	NA	NA	NA	NA	NA	NA	0.383276	0.426046	0.392378	NA	NA	NA	NA
TOP2A	P11388	DNA topoisomerase 2-alpha		grey	NA	NA	NA	NA	0.457903	0.448178	0.418395	0.389141	0.41691	0.424291	NA	NA	NA	NA
MTHFD1	P11586	C-1-tetrahydrofolate synthase, cytoplasmic		grey	NA	NA	NA	NA	0.65273	0.671355	0.602354	0.357107	0.403992	0.371946	NA	NA	NA	NA
SLC25A6	P12236	ADP/ATP translocase 3		grey	NA	0.262144	NA	0.571958	NA	0.489975	0.46249	0.348645	0.379129	0.389347	NA	NA	NA	NA
IMPDH2	P12268	Inosine-5'-monophosphate dehydrogenase 2		grey	NA	NA	NA	NA	0.44437	0.663027	0.617401	0.390266	0.474014	0.424351	NA	NA	NA	NA
CKB	P12277	Creatine kinase B-type		grey	NA	NA	NA	NA	0.678125	0.580484	0.622613	0.462316	0.447383	0.41646	NA	NA	NA	NA
XRCC6	P12956	X-ray repair cross-complementing protein 6		grey	0.19065	0.222856	0.310093	0.613019	0.706124	0.707011	0.749468	0.597115	0.625384	0.634262	0.821486	0.784506	0.682469	0.392599
XRCC5	P13010	X-ray repair cross-complementing protein 5		grey	0.161158	0.240807	0.31296	0.610396	0.695605	0.674405	0.673235	0.572613	0.561903	0.580202	0.907298	0.79846	0.737491	0.478784
EEF2	P13639	Elongation factor 2		grey	0.459967	0.269709	0.404808	0.53065	0.635303	0.669771	0.639263	0.393837	0.425277	0.417772	0.779648	0.776206	0.648617	0.31722
PDIA4	P13667	Protein disulfide-isomerase A4		grey	NA	NA	NA	NA	NA	0.640766	0.696768	0.380172	0.386028	0.35408	NA	NA	NA	NA
PLS3	P13797	Plastin-3		grey	NA	NA	NA	NA	0.565387	0.61003	0.692506	0.372946	0.437178	0.420918	NA	NA	NA	NA
ETFA	P13804	Electron transfer flavoprotein subunit alpha, mitochondrial		grey	NA	NA	NA	NA	NA	NA	NA	0.292566	0.292406	0.277984	NA	NA	NA	NA
PKM	P14618	Pyruvate kinase PKM		grey	NA	0.292954	NA	NA	0.673789	0.694656	0.671862	0.354968	0.403281	0.365474	0.589996	0.630996	0.639132	0.290287
HSP90B1	P14625	Endoplasmin		grey	NA	NA	NA	NA	0.626322	0.700159	0.619323	0.352445	0.402311	0.389216	NA	NA	NA	NA
SNRPB, SNRPN	P14678, P63162	Small nuclear ribonucleoprotein-associated proteins B and B', Small nuclear ribonucleoprotein-associated protein N		grey	NA	NA	NA	0.73302	NA	0.434824	0.464267	0.631255	NA	0.573233	0.952541	0.909363	0.803153	0.527164
HNRNPL	P14866	Heterogeneous nuclear ribonucleoprotein L		grey	NA	NA	NA	0.600767	0.490235	0.475148	0.482123	0.514728	0.580695	0.524963	0.915355	0.759494	0.495141	0.207594
DARS	P14868	Aspartate--tRNA ligase, cytoplasmic		grey	NA	NA	NA	NA	NA	0.551931	0.586657	0.356702	0.408567	0.380387	NA	NA	NA	NA
JUP	P14923	Junction plakoglobin		grey	NA	NA	NA	NA	0.370134	NA	NA	0.197985	NA	NA	0.222449	NA	NA	0.285633
AKR1B1	P15121	Aldose reductase		grey	NA	NA	NA	NA	NA	NA	NA	NA	0.459778	0.420629	NA	NA	NA	NA
GSPT1, GSPT2	P15170, Q8IYD1	Eukaryotic peptide chain release factor GTP-binding subunit ERF3A, Eukaryotic peptide chain release factor GTP-binding subunit ERF3B		grey	NA	NA	NA	NA	NA	0.59992	0.612072	NA	NA	NA	NA	NA	NA	NA
RPS2	P15880	40S ribosomal protein S2		grey	0.338773	0.311789	NA	0.622766	0.495843	0.519161	0.486458	0.40577	0.498792	0.451351	0.8814	0.837618	0.71285	0.462556
DSP	P15924	Desmoplakin		grey	NA	NA	0.189634	0.931902	0.322126	NA	NA	0.234883	NA	NA	0.0913717	NA	NA	0.254282
RPA2	P15927	Replication protein A 32 kDa subunit		grey	NA	0.15802	NA	NA	NA	NA	NA	NA	NA	NA	NA	NA	NA	NA
HIST1H1C	P16403	Histone H1.2		grey	0.872762	NA	NA	NA	NA	NA	NA	NA	NA	NA	0.685663	0.370836	NA	0.344838
ATP2A2	P16615	Sarcoplasmic/endoplasmic reticulum calcium ATPase 2		grey	NA	NA	NA	NA	0.476198	0.522308	0.468825	0.385069	0.403163	0.392762	NA	NA	NA	NA
YBX3	P16989	Y-box-binding protein 3		grey	0.234127	0.484943	NA	NA	0.395555	0.308647	0.298324	0.522011	0.591687	0.539701	NA	0.524624	0.322613	0.0975299
HSPA6	P17066	Heat shock 70 kDa protein 6		grey	NA	NA	NA	NA	NA	NA	NA	NA	0.183327	0.17472	NA	NA	NA	NA
CTPS1	P17812	CTP synthase 1		grey	NA	NA	NA	NA	NA	0.612027	0.699248	0.331855	0.430118	0.37673	NA	NA	NA	NA
DDX5	P17844	Probable ATP-dependent RNA helicase DDX5		grey	NA	NA	NA	NA	NA	0.514634	0.502982	0.442661	0.493648	0.40495	0.88497	0.78458	0.601752	0.264814
PFKL	P17858	ATP-dependent 6-phosphofructokinase, liver type		grey	NA	NA	NA	NA	NA	0.436655	0.340504	NA	0.334314	0.336527	NA	NA	NA	NA
PSMC3	P17980	26S protease regulatory subunit 6A		grey	NA	NA	NA	NA	NA	0.531199	0.414527	0.3905	0.364728	0.36899	NA	NA	NA	NA
TCP1	P17987	T-complex protein 1 subunit alpha		grey	0.367985	NA	0.293446	0.524786	0.550521	0.518675	0.49042	0.32389	0.354826	0.339856	NA	NA	NA	NA
RPL35A	P18077	60S ribosomal protein L35a		grey	NA	NA	NA	NA	NA	0.40966	0.367845	0.490874	NA	NA	0.885036	0.874287	0.744317	0.474619
RPL7	P18124	60S ribosomal protein L7		grey	0.40215	0.439136	0.333724	0.52298	0.34006	0.365374	0.3613	0.655671	0.686078	0.674934	0.919705	0.808803	0.655576	0.402136
SON	P18583	Protein SON		grey	NA	NA	NA	NA	0.372332	0.298634	0.337849	NA	0.370927	0.359799	0.896839	0.883487	0.683564	0.39611
RPL17-C18orf32, RPL17	A0A0A6YYL6, P18621	Protein RPL17-C18orf32, 60S ribosomal protein L17		grey	NA	NA	0.381643	0.561057	0.408179	0.423415	0.3924	0.435803	0.50419	0.444781	0.892117	0.82672	0.650948	0.363908
RCC1	P18754	Regulator of chromosome condensation		grey	NA	NA	NA	NA	NA	NA	NA	NA	0.516791	0.544253	NA	NA	NA	NA
LIG1	P18858	DNA ligase 1		grey	NA	NA	NA	NA	NA	NA	NA	NA	NA	0.827253	NA	NA	NA	NA
NCL	P19338	Nucleolin		grey	0.846569	NA	NA	NA	0.507995	0.431631	NA	0.588443	0.584562	0.561596	0.754378	NA	NA	0.198133
POLR2C	P19387	DNA-directed RNA polymerase II subunit RPB3		grey	NA	NA	NA	NA	NA	NA	NA	NA	NA	NA	0.886478	0.783184	0.479066	0.230343
POLR2E	P19388	DNA-directed RNA polymerases I, II, and III subunit RPABC1		grey	NA	NA	NA	NA	NA	NA	NA	NA	NA	NA	NA	0.78241	0.595829	0.403953
TRIM21	P19474	E3 ubiquitin-protein ligase TRIM21		grey	NA	NA	0.356955	0.587068	NA	NA	NA	NA	NA	NA	0.855159	0.812418	0.540082	0.260421
LMNB1	P20700	Lamin-B1		grey	0.415092	0.243084	0.407937	NA	0.288038	0.284457	0.269209	0.293486	0.331327	0.316954	0.835323	NA	NA	NA
CDK11B, CDK11A	P21127, Q9UQ88	Cyclin-dependent kinase 11B, Cyclin-dependent kinase 11A		grey	NA	NA	NA	NA	NA	NA	NA	NA	NA	NA	0.805326	0.880429	0.546094	0.22679
FLNA	P21333	Filamin-A		grey	NA	NA	NA	NA	0.393818	0.489056	0.478275	0.405678	0.395273	0.384627	NA	NA	NA	NA
VDAC1	P21796	Voltage-dependent anion-selective channel protein 1		grey	NA	0.301187	0.425713	0.625156	NA	0.62688	NA	0.359221	0.391901	0.383887	NA	NA	NA	NA
FBL	P22087	rRNA 2'-O-methyltransferase fibrillarin		grey	NA	NA	0.502933	0.597907	0.405431	0.394156	0.355915	0.571698	0.596481	0.533321	0.629684	0.829575	0.675672	0.39299
GART	P22102	Trifunctional purine biosynthetic protein adenosine-3 [Includes: Phosphoribosylamine--glycine ligase		grey	NA	NA	NA	NA	0.603127	0.636628	0.58316	0.364183	0.413541	0.398503	NA	NA	NA	NA
PAICS	P22234	Multifunctional protein ADE2 [Includes: Phosphoribosylaminoimidazole-succinocarboxamide synthase		grey	NA	NA	NA	NA	NA	NA	NA	0.365374	0.393671	0.40668	NA	NA	NA	NA
UBA1	P22314	Ubiquitin-like modifier-activating enzyme 1		grey	NA	NA	NA	NA	0.692241	0.687187	0.644369	0.357871	0.405491	0.37657	NA	NA	NA	NA
HNRNPA2B1	P22626	Heterogeneous nuclear ribonucleoproteins A2/B1		grey	0.826858	NA	0.431036	0.558753	0.255592	0.201144	0.190303	0.55175	0.620623	0.586538	0.907971	0.495719	0.222552	0.0679884
UQCRC2	P22695	Cytochrome b-c1 complex subunit 2, mitochondrial		grey	NA	NA	NA	NA	NA	NA	NA	0.278551	0.326245	0.347067	NA	NA	NA	NA
SFPQ	P23246	Splicing factor, proline- and glutamine-rich		grey	0.833674	NA	NA	NA	NA	0.524421	0.596384	NA	NA	NA	NA	NA	NA	NA
RPS3	P23396	40S ribosomal protein S3		grey	NA	0.29203	0.409298	0.494707	0.427754	0.447462	0.473864	0.4669	0.485218	0.443216	0.942522	0.827175	0.736842	0.473141
AHCY	P23526	Adenosylhomocysteinase		grey	NA	NA	NA	NA	NA	0.674807	NA	0.282866	0.368802	0.321845	NA	NA	NA	NA
CFL1	P23528	Cofilin-1		grey	NA	NA	NA	NA	NA	NA	NA	NA	0.436826	0.349725	NA	NA	NA	NA
EIF4B	P23588	Eukaryotic translation initiation factor 4B		grey	NA	NA	NA	NA	NA	NA	NA	NA	NA	NA	NA	NA	0.281671	0.182158
RRM1	P23921	Ribonucleoside-diphosphate reductase large subunit		grey	NA	NA	NA	NA	NA	NA	NA	NA	0.324936	0.33489	NA	NA	NA	NA
ACAT1	P24752	Acetyl-CoA acetyltransferase, mitochondrial		grey	NA	NA	NA	NA	NA	NA	NA	NA	0.381861	0.304159	NA	NA	NA	NA
POLR2A	P24928	DNA-directed RNA polymerase II subunit RPB1		grey	NA	NA	NA	NA	NA	NA	NA	NA	NA	NA	0.906154	0.858291	0.599584	0.286855
MCM3	P25205	DNA replication licensing factor MCM3		grey	NA	NA	NA	NA	NA	0.701002	NA	NA	0.536092	0.534862	NA	NA	NA	NA
ATP5A1	P25705	ATP synthase subunit alpha, mitochondrial		grey	0.753269	NA	NA	NA	0.561076	0.607674	0.585612	0.33259	0.392784	0.366021	NA	NA	NA	NA
PSMA4	P25789	Proteasome subunit alpha type-4		grey	NA	NA	NA	NA	NA	NA	NA	0.388151	NA	0.461549	NA	NA	NA	NA
MSN, RDX	P26038, P35241	Moesin, Radixin		grey	NA	NA	NA	NA	NA	0.68593	NA	0.338011	0.374887	0.331524	NA	NA	NA	NA
U2AF2	P26368	Splicing factor U2AF 65 kDa subunit		grey	NA	NA	NA	NA	NA	NA	NA	NA	NA	NA	NA	0.817318	0.524285	0.270222
RPL13	P26373	60S ribosomal protein L13		grey	NA	NA	0.419131	0.556774	0.363928	0.404372	0.395891	0.586247	0.647154	0.588867	0.936912	0.868197	0.702761	0.39169
PTBP1	P26599	Polypyrimidine tract-binding protein 1		grey	0.695947	NA	0.399428	0.616949	0.507438	0.579018	0.551891	NA	0.545186	0.543567	0.816339	0.679384	0.55514	0.241988
TARS	P26639	Threonine--tRNA ligase, cytoplasmic		grey	NA	NA	NA	NA	0.605973	0.685703	0.608473	0.628832	0.447541	0.413954	NA	NA	NA	NA
EEF1G	P26641	Elongation factor 1-gamma		grey	0.463749	NA	NA	0.519354	0.557933	0.583385	0.543525	0.403825	0.433678	0.412649	NA	NA	NA	NA
YWHAQ	P27348	14-3-3 protein theta		grey	NA	NA	NA	NA	NA	NA	NA	0.729342	NA	NA	NA	NA	NA	NA
RPL10	P27635	60S ribosomal protein L10		grey	NA	NA	NA	0.597536	0.372919	0.45328	0.415208	0.451225	0.519646	0.505293	0.98627	0.815974	0.53678	0.26712
RPA1	P27694	Replication protein A 70 kDa DNA-binding subunit		grey	0.0467193	0.124863	0.34033	0.631924	0.72638	0.73199	0.763308	0.640856	0.637786	0.624004	NA	NA	NA	NA
CAD	P27708	CAD protein [Includes: Glutamine-dependent carbamoyl-phosphate synthase		grey	NA	NA	NA	NA	0.501595	0.516908	0.476911	0.357471	0.40235	0.373041	NA	NA	NA	NA
CALR	P27797	Calreticulin		grey	NA	NA	NA	NA	NA	NA	0.602401	NA	0.367881	0.347888	NA	NA	NA	NA
CANX	P27824	Calnexin		grey	0.668006	0.226362	NA	0.534499	0.490428	0.57916	0.649737	0.351882	0.393134	0.375109	NA	NA	NA	NA
PSMB5	P28074	Proteasome subunit beta type-5		grey	NA	NA	NA	NA	NA	NA	NA	NA	0.430147	0.389085	NA	NA	NA	NA
NDUFS1	P28331	NADH-ubiquinone oxidoreductase 75 kDa subunit, mitochondrial		grey	NA	NA	NA	NA	NA	NA	NA	NA	0.410631	0.34791	NA	NA	NA	NA
TKT	P29401	Transketolase		grey	NA	NA	NA	NA	0.707491	0.656263	0.714073	0.340565	0.380329	0.35816	NA	NA	NA	NA
RBMS1, RBMS3	P29558, Q6XE24	RNA-binding motif, single-stranded-interacting protein 1, RNA-binding motif, single-stranded-interacting protein 3		grey	NA	NA	NA	NA	0.559627	NA	NA	0.626754	NA	NA	NA	NA	NA	NA
PRDX6	P30041	Peroxiredoxin-6		grey	NA	NA	NA	NA	NA	0.618917	NA	0.420223	0.420024	0.395215	NA	NA	NA	NA
RPL12	P30050	60S ribosomal protein L12		grey	0.298851	0.436319	0.806666	0.931477	0.326939	0.341377	0.327243	0.641731	0.688143	0.689711	0.903707	0.877478	0.759059	0.4633
PDIA3	P30101	Protein disulfide-isomerase A3		grey	NA	NA	NA	NA	NA	0.576343	0.745495	NA	0.431204	0.40271	NA	NA	NA	NA
PPP2R1A	P30153	Serine/threonine-protein phosphatase 2A 65 kDa regulatory subunit A alpha isoform		grey	0.259512	0.25935	0.376485	0.639329	0.506782	0.536027	NA	0.308006	0.430848	0.424672	NA	NA	NA	NA
NKTR	P30414	NK-tumor recognition protein		grey	NA	NA	NA	NA	NA	NA	NA	NA	NA	NA	NA	0.676071	NA	NA
POLR2B	P30876	DNA-directed RNA polymerase II subunit RPB2		grey	NA	NA	NA	0.572787	NA	0.45045	NA	NA	0.48917	0.37926	0.912519	0.823315	0.623054	0.301476
SDHA	P31040	Succinate dehydrogenase [ubiquinone] flavoprotein subunit, mitochondrial		grey	NA	NA	NA	NA	NA	NA	NA	0.324174	0.402314	0.336773	NA	NA	NA	NA
GDI1	P31150	Rab GDP dissociation inhibitor alpha		grey	NA	NA	NA	NA	NA	0.718595	NA	NA	0.403932	0.390411	NA	NA	NA	NA
DNAJA1	P31689	DnaJ homolog subfamily A member 1		grey	0.123937	0.224962	0.310849	0.626794	0.328223	0.348029	0.32109	0.283457	0.319042	0.304304	NA	NA	0.70215	0.369737
ATIC	P31939	Bifunctional purine biosynthesis protein PURH [Cleaved into: Bifunctional purine biosynthesis protein PURH, N-terminally processed] [Includes: Phosphoribosylaminoimidazolecarboxamide formyltransferase		grey	NA	NA	NA	NA	0.691919	0.584993	NA	0.394244	0.454533	0.434715	NA	NA	NA	NA
HNRNPH3	P31942	Heterogeneous nuclear ribonucleoprotein H3		grey	NA	NA	NA	NA	0.442023	0.35378	0.453999	0.653632	0.706392	0.582742	0.822645	0.442207	0.148298	0.0792507
HNRNPH1	P31943	Heterogeneous nuclear ribonucleoprotein H		grey	0.522468	0.525845	0.448905	0.644417	0.400379	0.405286	0.361365	0.528346	0.563262	0.536458	0.9543	0.796052	0.550076	0.276526
STIP1	P31948	Stress-induced-phosphoprotein 1		grey	NA	NA	NA	NA	NA	NA	NA	NA	0.364333	0.393171	NA	NA	NA	NA
RPL9	P32969	60S ribosomal protein L9		grey	NA	NA	NA	NA	NA	0.417857	NA	NA	0.608028	NA	0.888717	NA	0.67584	0.383082
MCM4	P33991	DNA replication licensing factor MCM4		grey	NA	NA	NA	NA	NA	0.607612	0.643138	NA	0.515574	0.503845	NA	NA	NA	NA
MCM7	P33993	DNA replication licensing factor MCM7		grey	NA	NA	NA	NA	NA	0.581555	0.565142	0.573761	0.538894	0.51842	NA	NA	NA	NA
HSPA4	P34932	Heat shock 70 kDa protein 4		grey	NA	NA	NA	NA	0.672443	0.680715	0.663707	0.362814	0.398681	0.326812	NA	NA	NA	NA
PHB	P35232	Prohibitin		grey	NA	NA	NA	NA	NA	0.681893	0.551107	0.284718	0.356764	0.307695	NA	NA	NA	NA
RFC1	P35251	Replication factor C subunit 1		grey	NA	NA	NA	NA	0.786903	0.659435	0.663764	0.569504	0.583021	0.566875	NA	NA	NA	NA
MYH9	P35579	Myosin-9		grey	NA	NA	NA	NA	0.460768	0.535704	0.481532	0.312393	0.386051	0.353976	NA	NA	NA	NA
MYH10	P35580	Myosin-10		grey	NA	NA	NA	NA	0.470364	0.512124	0.4291	0.348831	0.366029	0.354801	NA	NA	NA	NA
COPB2	P35606	Coatomer subunit beta'		grey	NA	NA	NA	NA	0.469634	0.598055	0.576271	0.406581	0.430874	0.40733	NA	NA	NA	NA
NUP214	P35658	Nuclear pore complex protein Nup214		grey	NA	NA	NA	NA	NA	0.423122	0.380341	NA	0.381632	0.351218	NA	NA	NA	NA
KRT2	P35908	Keratin, type II cytoskeletal 2 epidermal		grey	0.0603941	0.939419	0.0284707	0.975992	0.0276431	0.0693398	0.0332952	0.0295116	0.0539522	0.0515178	0.0374824	0.0559545	0.0335587	0.0265186
PSMC2	P35998	26S protease regulatory subunit 7		grey	NA	NA	NA	NA	0.55385	0.536758	0.565142	0.371938	0.405491	0.395537	NA	NA	NA	NA
ATP5C1	P36542	ATP synthase subunit gamma, mitochondrial		grey	NA	NA	NA	NA	0.419614	0.451279	0.364232	0.351996	0.349378	0.310521	NA	NA	NA	NA
RPL4	P36578	60S ribosomal protein L4		grey	0.27696	0.247942	0.34673	0.522507	0.338279	0.344537	0.345383	0.60752	0.622	0.606485	0.908679	0.84793	0.745301	0.446676
RBMX	P38159	RNA-binding motif protein, X chromosome		grey	NA	NA	NA	NA	NA	NA	NA	NA	NA	NA	0.916583	0.192696	0.096625	0.0537346
HSPA9	P38646	Stress-70 protein, mitochondrial		grey	0.458015	0.19088	0.412269	0.550019	0.278406	0.279212	0.238008	0.2453	0.243731	0.226987	0.895873	0.459714	0.13994	0.0887536
EIF4A3	P38919	Eukaryotic initiation factor 4A-III		grey	0.524104	0.659396	0.666066	0.861415	0.445298	0.428584	0.410829	0.594715	0.618757	0.613347	0.915276	0.872864	0.748143	0.498168
RPS19	P39019	40S ribosomal protein S19		grey	NA	NA	NA	NA	NA	NA	NA	NA	NA	NA	0.851568	0.858029	NA	0.452951
RPL3	P39023	60S ribosomal protein L3		grey	0.319723	0.293057	0.386526	0.522581	0.342767	0.358773	0.340404	0.644735	0.68255	0.673074	0.92313	0.85277	0.7426	0.453922
DDOST	P39656	Dolichyl-diphosphooligosaccharide--protein glycosyltransferase 48 kDa subunit		grey	NA	NA	NA	NA	NA	NA	NA	NA	0.423777	0.416859	NA	NA	NA	NA
CCT6A	P40227	T-complex protein 1 subunit zeta		grey	NA	NA	0.376135	NA	0.543108	0.572869	0.54597	0.335619	0.370059	0.346106	NA	NA	NA	NA
RPL13A	P40429	60S ribosomal protein L13a		grey	NA	NA	0.357537	0.500213	0.346478	0.370499	0.366535	0.620968	0.651471	0.624258	0.917992	0.8484	0.741856	0.435577
MDH1	P40925	Malate dehydrogenase, cytoplasmic		grey	NA	NA	NA	NA	NA	NA	NA	NA	0.430271	0.407664	NA	NA	NA	NA
MDH2	P40926	Malate dehydrogenase, mitochondrial		grey	0.758559	NA	NA	0.457645	0.599696	0.684543	0.693082	0.287709	0.370408	0.323566	NA	NA	NA	NA
RFC3	P40938	Replication factor C subunit 3		grey	NA	NA	NA	NA	NA	NA	NA	NA	0.4897	NA	NA	NA	NA	NA
HADHA	P40939	Trifunctional enzyme subunit alpha, mitochondrial		grey	NA	NA	NA	NA	0.397358	0.466328	0.388237	0.264782	0.302139	0.30662	NA	NA	NA	NA
EIF2S3, EIF2S3L	P41091, Q2VIR3	Eukaryotic translation initiation factor 2 subunit 3, Putative eukaryotic translation initiation factor 2 subunit 3-like protein		grey	NA	NA	NA	NA	NA	NA	NA	NA	0.422619	0.41962	NA	NA	NA	NA
BUD31	P41223	Protein BUD31 homolog		grey	NA	NA	NA	NA	NA	NA	NA	NA	NA	NA	0.785329	NA	0.756691	0.507122
GARS	P41250	Glycine--tRNA ligase		grey	NA	NA	NA	NA	NA	0.680072	0.638258	0.428098	0.514139	0.451583	NA	NA	NA	NA
IARS	P41252	Isoleucine--tRNA ligase, cytoplasmic		grey	NA	NA	0.390857	0.558033	0.445934	0.497641	0.444219	0.347352	0.403473	0.375808	NA	NA	NA	NA
TMPO	P42166	Lamina-associated polypeptide 2, isoform alpha		grey	NA	NA	NA	NA	0.645025	0.724351	0.757564	0.565142	0.584044	0.618291	NA	NA	NA	NA
RPS27	P42677	40S ribosomal protein S27		grey	NA	NA	NA	NA	NA	0.420095	0.336848	0.372762	0.35337	NA	NA	NA	NA	NA
HELZ	P42694	Probable helicase with zinc finger domain		grey	NA	0.54078	NA	0.549544	0.571863	0.530428	0.503993	0.636945	0.630642	0.654326	0.753306	NA	NA	NA
RBM34	P42696	RNA-binding protein 34		grey	NA	NA	NA	NA	0.277206	0.299322	0.28551	NA	0.59578	NA	NA	NA	NA	NA
LRPPRC	P42704	Leucine-rich PPR motif-containing protein, mitochondrial		grey	NA	NA	NA	NA	0.374875	0.385802	0.321804	0.274626	0.278739	0.277712	NA	NA	NA	NA
MATR3	P43243	Matrin-3		grey	0.610804	0.514597	0.422152	0.62788	0.41997	0.448178	0.409988	0.468614	0.503352	0.496992	0.87858	0.854268	0.673917	0.382464
VDAC2	P45880	Voltage-dependent anion-selective channel protein 2		grey	0.416552	NA	0.403363	0.537265	0.565274	0.63505	0.60812	0.347782	0.396962	0.355379	0.964109	NA	NA	NA
NOP2	P46087	Probable 28S rRNA		grey	NA	NA	NA	NA	0.355313	0.339903	0.334496	0.645817	0.652561	0.615148	0.759748	0.849755	0.727943	0.408512
MTIF2	P46199	Translation initiation factor IF-2, mitochondrial		grey	NA	NA	NA	NA	NA	NA	NA	NA	0.285393	0.333111	NA	NA	NA	NA
NSF	P46459	Vesicle-fusing ATPase		grey	NA	NA	NA	NA	NA	NA	0.700177	0.464456	NA	0.55389	NA	NA	NA	NA
RPL27A	P46776	60S ribosomal protein L27a		grey	NA	NA	0.368444	0.609065	0.408105	0.39722	0.397351	0.478439	0.554823	0.499076	0.985418	0.537636	0.334248	0.175435
RPL5	P46777	60S ribosomal protein L5		grey	0.204677	0.12379	0.344077	0.437828	0.327654	0.317327	0.355462	0.602544	0.637037	0.591587	0.879938	0.883701	0.759627	0.449618
RPL21	P46778	60S ribosomal protein L21		grey	NA	NA	NA	NA	NA	0.367161	NA	NA	0.612913	0.559161	NA	NA	NA	0.464066
RPL28	P46779	60S ribosomal protein L28		grey	NA	NA	NA	NA	0.318583	0.383667	0.367769	0.529102	0.602148	0.531045	0.776656	0.588968	0.563319	0.376695
RPS9	P46781	40S ribosomal protein S9		grey	NA	NA	0.3667	NA	0.398514	0.371287	0.375441	0.517398	0.503155	0.490412	0.921802	0.701537	0.509732	0.240941
RPS5	P46782	40S ribosomal protein S5		grey	NA	NA	NA	NA	0.374793	0.400591	NA	0.578983	0.569151	NA	0.882135	0.570981	0.813735	0.524263
RPS10, RPS10-NUDT3	P46783, S4R435	40S ribosomal protein S10, RPS10-NUDT3 readthrough		grey	NA	NA	NA	NA	0.309268	0.35286	NA	NA	NA	NA	0.894661	NA	0.668512	0.494955
MAP1B	P46821	Microtubule-associated protein 1B		grey	NA	NA	NA	NA	0.315495	0.33848	0.331515	0.300778	0.402571	0.299367	NA	NA	NA	NA
IQGAP1	P46940	Ras GTPase-activating-like protein IQGAP1		grey	NA	NA	NA	NA	0.474041	NA	NA	0.3682	0.35606	0.336443	NA	NA	NA	NA
RPL29	P47914	60S ribosomal protein L29		grey	NA	NA	NA	NA	0.314853	0.311039	0.502017	0.643112	0.651106	0.800052	NA	NA	NA	NA
ARCN1	P48444	Coatomer subunit delta		grey	NA	NA	NA	NA	NA	0.595894	0.6272	0.387656	0.420887	0.468961	NA	NA	NA	NA
CCT5	P48643	T-complex protein 1 subunit epsilon		grey	NA	NA	NA	NA	0.575408	0.577738	0.523151	0.306673	0.338156	0.318044	NA	NA	NA	NA
RPL34	P49207	60S ribosomal protein L34		grey	NA	NA	NA	NA	NA	0.378874	NA	NA	NA	NA	0.894091	0.836657	0.721184	0.479885
FASN	P49327	Fatty acid synthase		grey	NA	NA	NA	NA	0.506514	0.554447	0.506075	0.369133	0.402175	0.390374	NA	NA	NA	NA
CCT3	P49368	T-complex protein 1 subunit gamma		grey	NA	NA	NA	NA	0.63938	0.495306	0.547532	0.320698	0.359828	0.336192	NA	NA	NA	NA
TUFM	P49411	Elongation factor Tu, mitochondrial		grey	NA	NA	NA	NA	0.457924	0.537829	0.445639	0.270462	0.309502	0.277054	NA	NA	NA	NA
AARS	P49588	Alanine--tRNA ligase, cytoplasmic		grey	NA	NA	NA	NA	NA	0.706133	0.620695	0.339437	0.403822	0.398634	NA	NA	NA	NA
SARS	P49591	Serine--tRNA ligase, cytoplasmic		grey	NA	NA	NA	NA	NA	NA	NA	NA	0.497528	0.488148	NA	NA	NA	NA
MCM2	P49736	DNA replication licensing factor MCM2		grey	NA	NA	NA	NA	0.589592	0.61445	0.483386	0.520061	0.430102	NA	NA	NA	NA	NA
CLK1	P49759	Dual specificity protein kinase CLK1		grey	NA	NA	NA	NA	NA	NA	NA	NA	NA	NA	0.908382	0.432791	0.202062	0.0913964
CLK2	P49760	Dual specificity protein kinase CLK2		grey	NA	NA	NA	NA	NA	NA	NA	NA	NA	NA	0.894497	0.687314	0.323254	0.117917
CLK3	P49761	Dual specificity protein kinase CLK3		grey	NA	NA	NA	NA	NA	NA	NA	NA	NA	NA	0.672614	0.683834	0.429705	0.159713
RANBP2	P49792	E3 SUMO-protein ligase RanBP2		grey	NA	NA	NA	NA	0.286407	0.361255	0.580343	0.353659	0.432968	0.299455	NA	NA	NA	NA
LIG3	P49916	DNA ligase 3		grey	NA	NA	NA	NA	NA	0.712916	0.713204	NA	NA	0.712106	NA	NA	NA	NA
EMD	P50402	Emerin		grey	0.193672	0.283511	0.349868	0.568082	0.473729	0.493217	0.449163	0.46391	0.472153	0.448474	NA	NA	NA	0.432695
RPL14	P50914	60S ribosomal protein L14		grey	NA	NA	0.437858	NA	0.335075	0.359717	0.320204	0.622698	0.696381	0.650655	0.890025	0.888628	0.744716	0.477138
CCT8	P50990	T-complex protein 1 subunit theta		grey	NA	NA	NA	NA	0.631906	0.662891	0.659459	0.365257	0.375796	0.361434	NA	NA	NA	NA
CCT4	P50991	T-complex protein 1 subunit delta		grey	NA	NA	NA	NA	0.569337	0.632272	0.590164	0.353872	0.376846	0.365434	NA	NA	NA	NA
FXR1	P51114	Fragile X mental retardation syndrome-related protein 1		grey	NA	NA	NA	NA	0.406148	NA	NA	NA	NA	NA	0.888617	0.749474	0.427587	0.155163
FXR2	P51116	Fragile X mental retardation syndrome-related protein 2		grey	NA	NA	NA	NA	NA	NA	NA	NA	0.642857	NA	0.904876	0.813596	0.479126	0.197741
DAP3	P51398	28S ribosomal protein S29, mitochondrial		grey	NA	NA	NA	0.689793	NA	NA	NA	NA	NA	NA	NA	NA	NA	NA
SSR4	P51571	Translocon-associated protein subunit delta		grey	NA	NA	0.365933	NA	NA	NA	NA	NA	0.367653	0.366053	NA	NA	NA	NA
HCFC1	P51610	Host cell factor 1		grey	NA	NA	NA	NA	NA	NA	NA	NA	0.492118	NA	NA	NA	NA	NA
HNRNPA3	P51991	Heterogeneous nuclear ribonucleoprotein A3		grey	0.767328	NA	NA	0.626566	0.481927	0.474144	0.539891	0.537551	0.583299	0.556639	NA	0.604149	0.295636	0.10456
PGD	P52209	6-phosphogluconate dehydrogenase, decarboxylating		grey	NA	NA	NA	NA	NA	NA	NA	NA	NA	0.461966	NA	NA	NA	NA
HNRNPM	P52272	Heterogeneous nuclear ribonucleoprotein M		grey	0.487024	0.45405	0.438044	0.604891	0.476218	0.497518	0.512884	0.59705	0.639964	0.642857	0.910129	0.890511	0.736537	0.445836
KPNA2	P52292	Importin subunit alpha-1		grey	NA	NA	NA	NA	NA	0.481357	NA	0.382224	0.396117	0.473232	NA	NA	NA	NA
KPNA1	P52294	Importin subunit alpha-5		grey	NA	NA	NA	NA	NA	0.670163	0.612778	NA	0.643468	0.678993	NA	NA	NA	NA
NCBP2	P52298	Nuclear cap-binding protein subunit 2		grey	NA	NA	NA	NA	NA	NA	NA	NA	NA	NA	0.908579	0.864333	0.77031	0.602117
HNRNPF	P52597	Heterogeneous nuclear ribonucleoprotein F		grey	0.402153	0.510613	0.435248	0.601251	0.363673	0.383318	0.3382	0.513003	0.566104	0.533234	0.914821	0.812818	0.647304	0.352998
MSH6	P52701	DNA mismatch repair protein Msh6		grey	NA	NA	NA	NA	0.370194	0.373559	0.322328	0.334686	0.370792	0.359352	NA	NA	NA	NA
CAPZA1	P52907	F-actin-capping protein subunit alpha-1		grey	NA	NA	0.358604	NA	NA	NA	NA	NA	0.354622	0.287435	NA	NA	NA	NA
SLC25A1	P53007	Tricarboxylate transport protein, mitochondrial		grey	NA	NA	NA	0.608802	0.223982	0.377459	0.327048	0.270286	0.316594	0.330526	NA	NA	NA	NA
PPP5C	P53041	Serine/threonine-protein phosphatase 5		grey	NA	0.181182	NA	NA	0.501545	NA	0.412307	0.304512	0.319617	0.238095	NA	NA	NA	NA
ACLY	P53396	ATP-citrate synthase		grey	NA	NA	NA	NA	0.623834	0.617941	0.554308	0.348475	0.3469	0.351996	NA	NA	NA	NA
COPB1	P53618	Coatomer subunit beta		grey	NA	NA	NA	NA	0.509948	0.547286	0.515551	0.380874	0.405752	0.399295	NA	NA	NA	NA
COPA	P53621	Coatomer subunit alpha		grey	NA	NA	NA	NA	0.525842	0.57243	0.558226	0.383264	0.44535	0.42909	NA	NA	NA	NA
SLC16A1	P53985	Monocarboxylate transporter 1		grey	NA	NA	NA	NA	NA	0.375854	0.308566	NA	0.29625	0.311579	NA	NA	NA	NA
RARS	P54136	Arginine--tRNA ligase, cytoplasmic		grey	NA	NA	NA	NA	0.549286	0.565369	0.521508	0.377184	0.431343	0.415451	NA	NA	NA	NA
YARS	P54577	Tyrosine--tRNA ligase, cytoplasmic		grey	NA	NA	NA	NA	NA	NA	NA	0.479055	0.547552	0.512243	NA	NA	NA	NA
ALDH18A1	P54886	Delta-1-pyrroline-5-carboxylate synthase		grey	NA	NA	NA	NA	NA	0.513808	0.491632	0.371113	0.391694	0.330082	NA	NA	NA	NA
CSE1L	P55060	Exportin-2		grey	NA	NA	NA	NA	0.425423	0.458385	0.520223	0.330768	0.603631	0.372001	NA	NA	NA	NA
VCP	P55072	Transitional endoplasmic reticulum ATPase		grey	NA	NA	NA	NA	0.754716	0.731219	0.745767	0.403644	0.457094	0.478096	NA	NA	NA	NA
MFAP1	P55081	Microfibrillar-associated protein 1		grey	NA	NA	NA	NA	NA	NA	NA	NA	NA	NA	0.732749	0.800188	0.737216	0.508937
ADAR	P55265	Double-stranded RNA-specific adenosine deaminase		grey	NA	NA	NA	NA	0.398464	0.433258	0.410033	0.368444	0.483564	0.5004	NA	NA	NA	NA
SEC13	P55735	Protein SEC13 homolog		grey	NA	NA	NA	NA	NA	NA	NA	NA	0.51248	NA	NA	NA	NA	NA
NPEPPSL1, NPEPPS	A6NEC2, P55786	Puromycin-sensitive aminopeptidase-like protein, Puromycin-sensitive aminopeptidase		grey	NA	NA	NA	NA	NA	0.555041	0.575462	0.372392	0.391598	0.369101	NA	NA	NA	NA
HNRNPH2	P55795	Heterogeneous nuclear ribonucleoprotein H2		grey	NA	NA	0.451505	0.630593	0.415871	0.448595	0.438063	0.622	0.601339	0.59666	0.930382	0.814513	0.562076	0.27563
EIF3B	P55884	Eukaryotic translation initiation factor 3 subunit B		grey	NA	NA	NA	NA	0.523219	0.595322	0.495945	0.393193	0.443325	0.423777	NA	NA	NA	NA
RRP1	P56182	Ribosomal RNA processing protein 1 homolog A		grey	NA	NA	NA	NA	NA	0.378801	0.396441	NA	0.643951	NA	NA	NA	NA	0.445255
MARS	P56192	Methionine--tRNA ligase, cytoplasmic		grey	NA	NA	NA	NA	0.540526	0.531221	0.520591	0.365132	0.390207	0.419034	NA	NA	NA	NA
EIF6	P56537	Eukaryotic translation initiation factor 6		grey	NA	NA	NA	NA	NA	0.489225	0.566687	0.409803	0.690776	NA	NA	NA	NA	0.312469
GEMIN4	P57678	Gem-associated protein 4		grey	NA	NA	NA	NA	NA	0.408763	0.348449	NA	0.41626	0.377238	NA	NA	NA	NA
NUP107	P57740	Nuclear pore complex protein Nup107		grey	NA	NA	NA	NA	NA	0.328363	0.389257	NA	0.32103	0.234702	NA	NA	NA	NA
EPPK1	P58107	Epiplakin		grey	NA	NA	NA	NA	NA	0.554823	NA	NA	0.428686	0.404762	NA	NA	NA	NA
CD81	P60033	CD81 antigen		grey	NA	NA	NA	NA	NA	NA	0.430268	NA	NA	NA	NA	NA	NA	NA
TPI1	P60174	Triosephosphate isomerase		grey	NA	NA	NA	NA	0.70168	0.644077	NA	0.448993	0.449433	NA	NA	NA	NA	NA
ACTB	P60709	Actin, cytoplasmic 1		grey	0.468865	0.206941	0.469555	0.453782	0.631852	0.648765	0.606563	0.353354	0.38857	0.363641	0.875981	0.794222	0.611379	0.341759
EIF4A1	P60842	Eukaryotic initiation factor 4A-I		grey	0.543941	NA	0.431589	0.523303	0.772443	0.773853	0.753227	0.578699	0.571844	0.557542	NA	NA	NA	NA
RPS20	P60866	40S ribosomal protein S20		grey	NA	NA	NA	NA	0.347948	0.426497	NA	0.478	NA	NA	NA	0.89249	0.746386	0.487836
PRPS1	P60891	Ribose-phosphate pyrophosphokinase 1		grey	NA	NA	NA	NA	NA	NA	NA	0.449909	NA	NA	NA	NA	NA	NA
ACTR3, ACTR3B	P61158, Q9P1U1	Actin-related protein 3, Actin-related protein 3B		grey	NA	NA	NA	NA	NA	0.686619	0.613467	0.361875	0.41901	0.408253	NA	NA	NA	NA
ACTR1A	P61163	Alpha-centractin		grey	NA	NA	NA	NA	NA	0.555496	NA	NA	0.349847	0.301574	NA	NA	NA	NA
ABCE1	P61221	ATP-binding cassette sub-family E member 1		grey	NA	NA	NA	NA	NA	NA	0.636443	NA	0.499722	0.374726	NA	NA	NA	NA
RPS3A	P61247	40S ribosomal protein S3a		grey	NA	NA	NA	NA	NA	0.500923	0.506757	0.499111	0.533147	0.483167	NA	0.837091	NA	NA
RPL15	P61313	60S ribosomal protein L15		grey	0.181153	0.147417	NA	0.516879	0.351458	0.341169	0.36018	0.622926	0.65175	0.647825	0.947321	0.894886	0.714669	0.464708
MAGOH	P61326	Protein mago nashi homolog		grey	NA	NA	0.651337	0.86023	0.427207	NA	NA	0.62897	NA	NA	0.926068	0.860715	0.777109	0.532929
RPL27	P61353	60S ribosomal protein L27		grey	NA	NA	0.517351	0.62899	0.320315	0.335442	0.326055	0.619974	0.631893	0.710816	0.916262	0.883987	0.780118	0.518907
RPL37A	P61513	60S ribosomal protein L37a		grey	NA	NA	NA	NA	0.320984	0.380302	NA	NA	NA	NA	NA	NA	NA	NA
HNRNPK	P61978	Heterogeneous nuclear ribonucleoprotein K		grey	0.569392	0.304599	0.394152	0.622902	0.533168	0.553452	0.529279	0.520614	0.552653	0.514657	0.907959	0.765945	0.477463	0.180241
PPP1CA	P62136	Serine/threonine-protein phosphatase PP1-alpha catalytic subunit		grey	NA	NA	NA	NA	0.561327	NA	NA	0.452385	0.422446	NA	NA	NA	NA	NA
PSMC1	P62191	26S protease regulatory subunit 4		grey	NA	NA	NA	NA	NA	0.510044	0.550238	NA	0.434357	0.427433	NA	NA	NA	NA
PSMC5	P62195	26S protease regulatory subunit 8		grey	NA	NA	NA	NA	0.599728	0.566875	0.567568	NA	0.445353	0.406031	NA	NA	NA	NA
RPS8	P62241	40S ribosomal protein S8		grey	NA	NA	0.326314	0.576931	0.379256	0.364013	0.363653	0.625622	0.654577	0.659459	0.962256	0.281707	0.194685	0.105969
RPS15A	H3BN98, P62244	Uncharacterized protein, 40S ribosomal protein S15a		grey	NA	NA	NA	NA	NA	NA	NA	NA	NA	0.416249	0.813126	0.776915	0.541263	0.178975
RPS16	P62249	40S ribosomal protein S16		grey	NA	NA	0.450486	NA	0.425162	0.52082	0.570281	0.478887	0.537401	0.581817	0.907664	0.904597	0.748339	0.505073
YWHAE	P62258	14-3-3 protein epsilon		grey	NA	NA	NA	0.564114	0.471889	0.522377	0.492908	0.35959	0.467859	0.4383	NA	NA	NA	NA
RPS14	P62263	40S ribosomal protein S14		grey	NA	NA	NA	NA	NA	0.351534	0.360356	0.367413	0.408917	0.367357	NA	0.788516	NA	0.3407
RPS23	P62266	40S ribosomal protein S23		grey	NA	NA	NA	NA	NA	0.430644	0.403494	NA	0.441634	0.397442	0.706495	0.655612	NA	0.209798
RPS18	P62269	40S ribosomal protein S18		grey	NA	NA	0.513808	NA	0.396339	0.50015	0.534125	0.421236	0.561365	0.455216	0.871596	0.829039	0.756211	0.458306
RPS13	P62277	40S ribosomal protein S13		grey	NA	NA	NA	NA	NA	0.481693	0.46584	NA	0.516698	0.48422	0.886517	0.834347	0.638611	0.220394
RPS11	P62280	40S ribosomal protein S11		grey	NA	NA	0.343755	0.600705	NA	0.442832	0.392662	0.402125	0.40559	0.3682	0.916206	0.780162	0.615518	0.250279
SNRPE	P62304	Small nuclear ribonucleoprotein E		grey	NA	NA	NA	NA	NA	NA	NA	NA	NA	NA	0.967381	0.903899	0.796653	0.546382
SNRPD1	P62314	Small nuclear ribonucleoprotein Sm D1		grey	NA	NA	NA	NA	NA	NA	NA	NA	NA	NA	0.947257	0.898156	0.784297	0.545991
SNRPD2	P62316	Small nuclear ribonucleoprotein Sm D2		grey	NA	NA	NA	NA	NA	NA	NA	NA	NA	NA	0.964205	0.889541	0.788418	0.503919
SNRPD3	P62318	Small nuclear ribonucleoprotein Sm D3		grey	NA	NA	NA	NA	0.428996	NA	NA	0.566856	NA	NA	0.922559	0.867242	0.763286	0.525842
RPL7A	P62424	60S ribosomal protein L7a		grey	0.184346	0.134864	NA	NA	0.325382	0.330513	0.331609	0.623196	0.651786	0.644027	0.901521	0.851135	0.737891	0.462024
POLR2G	P62487	DNA-directed RNA polymerase II subunit RPB7		grey	NA	NA	NA	NA	NA	NA	NA	NA	NA	NA	0.877613	0.791053	0.619135	0.369121
CNBP	P62633	Cellular nucleic acid-binding protein		grey	NA	NA	NA	NA	NA	NA	0.57492	NA	0.679096	NA	NA	NA	NA	NA
RPS4X	P62701	40S ribosomal protein S4, X isoform		grey	NA	NA	NA	NA	0.46343	0.54747	0.531001	0.309316	0.46753	0.444821	0.851942	0.856119	0.71741	0.421725
RPS6	P62753	40S ribosomal protein S6		grey	NA	NA	NA	NA	0.380816	0.497038	0.409353	0.526111	0.574468	0.594584	0.95936	0.670673	0.471031	0.190415
HIST1H4A	P62805	Histone H4		grey	0.294219	0.178699	0.424066	0.579109	0.598893	0.606268	0.63469	0.712272	0.724374	0.761513	0.907744	0.830646	0.696123	0.473598
RAN	P62826	GTP-binding nuclear protein Ran		grey	NA	NA	NA	0.501045	0.603803	0.659215	0.650252	0.407611	0.462784	0.405816	NA	NA	NA	NA
RPL23	P62829	60S ribosomal protein L23		grey	0.247022	0.287274	NA	NA	0.33834	0.388779	0.325245	0.326812	0.373944	0.36027	0.8746	NA	NA	0.332171
RPS25	P62851	40S ribosomal protein S25		grey	NA	NA	NA	NA	NA	NA	NA	NA	NA	NA	0.882343	0.86352	0.74851	0.455005
RPS26, RPS26P11	P62854, Q5JNZ5	40S ribosomal protein S26, Putative 40S ribosomal protein S26-like 1		grey	NA	NA	NA	NA	NA	NA	0.420585	0.441553	0.543087	NA	NA	NA	NA	NA
GNB1	P62873	Guanine nucleotide-binding protein G(I)/G(S)/G(T) subunit beta-1		grey	NA	NA	NA	NA	NA	0.679908	NA	0.389279	0.37966	0.367169	NA	NA	NA	NA
GNB2	P62879	Guanine nucleotide-binding protein G(I)/G(S)/G(T) subunit beta-2		grey	NA	NA	NA	NA	NA	NA	NA	NA	0.364809	NA	NA	NA	NA	NA
RPL30	P62888	60S ribosomal protein L30		grey	0.412511	0.434802	0.561423	0.703265	0.351193	0.346354	0.322897	0.655505	0.693289	0.670359	0.964496	0.901132	0.767339	0.460099
RPL10A	P62906	60S ribosomal protein L10a		grey	0.327229	0.410492	0.82421	0.922877	0.337757	0.344254	0.333746	0.618306	0.658248	0.652126	0.903562	0.861557	0.745599	0.461108
RPL32	P62910	60S ribosomal protein L32		grey	NA	NA	NA	NA	0.288413	0.343492	NA	0.62799	0.661751	NA	0.962527	0.858305	NA	0.414592
RPL11	P62913	60S ribosomal protein L11		grey	0.222014	0.256279	NA	NA	0.329498	0.361545	0.368168	0.597877	0.65497	0.623338	0.909658	0.853536	0.812979	0.464869
RPL8	P62917	60S ribosomal protein L8		grey	NA	NA	0.491671	0.545013	0.352566	0.327957	0.340656	0.645993	0.670663	0.676396	0.976436	0.936184	0.774118	0.47344
PPIA	P62937	Peptidyl-prolyl cis-trans isomerase A		grey	NA	NA	NA	NA	NA	NA	NA	0.31721	0.371018	NA	NA	NA	NA	NA
TRA2B	P62995	Transformer-2 protein homolog beta		grey	0.319205	0.418796	0.308289	0.58753	0.219195	0.20782	0.155313	0.515293	0.583385	0.550784	0.970709	0.788695	0.549082	0.263569
YWHAZ	P63104	14-3-3 protein zeta/delta		grey	NA	NA	NA	NA	0.505953	0.539891	0.522719	0.383979	0.449648	0.424517	NA	NA	NA	NA
PPP2R2A, PPP2R2D	P63151, Q66LE6	Serine/threonine-protein phosphatase 2A 55 kDa regulatory subunit B alpha isoform, Serine/threonine-protein phosphatase 2A 55 kDa regulatory subunit B delta isoform		grey	NA	NA	NA	NA	NA	0.565972	0.597132	0.516301	0.395423	0.321914	NA	NA	NA	NA
RPL38	P63173	60S ribosomal protein L38		grey	NA	NA	0.430229	0.56815	0.297486	NA	NA	0.297975	NA	NA	NA	NA	NA	NA
RACK1	P63244	Receptor of activated protein C kinase 1		grey	NA	NA	0.371595	0.505789	0.646018	0.692222	0.696749	0.444845	0.46229	0.421601	0.903175	0.843218	0.748845	0.43695
PPP2CB, PPP2CA	P62714, P67775	Serine/threonine-protein phosphatase 2A catalytic subunit beta isoform, Serine/threonine-protein phosphatase 2A catalytic subunit alpha isoform		grey	NA	NA	NA	NA	NA	NA	NA	NA	NA	0.52424	NA	NA	NA	NA
YBX1	P67809	Nuclease-sensitive element-binding protein 1		grey	0.309263	0.504091	0.452709	0.757025	0.337169	0.319311	0.281841	0.601181	0.592933	0.583594	0.964452	0.708489	0.417344	0.113475
ACTC1, ACTA1	P68032, P68133	Actin, alpha cardiac muscle 1, Actin, alpha skeletal muscle		grey	NA	NA	NA	NA	NA	NA	NA	0.309702	0.360119	0.336179	0.856602	NA	NA	NA
EEF1A1, EEF1A1P5	P68104, Q5VTE0	Elongation factor 1-alpha 1, Putative elongation factor 1-alpha-like 3		grey	0.548206	0.352063	0.373245	0.567611	0.64065	0.611952	0.585921	0.481376	0.502042	0.488214	0.761034	0.747066	0.585028	0.248911
TUBA1B	P68363	Tubulin alpha-1B chain		grey	0.248521	0.248626	0.382971	0.540541	0.476689	0.48226	0.428526	0.338664	0.382785	0.35776	0.901976	0.873084	0.796276	0.577774
NOP14	P78316	Nucleolar protein 14		grey	NA	NA	NA	NA	0.415895	NA	0.43682	NA	NA	NA	NA	NA	NA	0.450839
GTF2I	P78347	General transcription factor II-I		grey	NA	NA	0.399619	NA	0.316132	0.347706	0.316842	0.316865	0.335892	0.30299	NA	NA	NA	NA
CCT2	P78371	T-complex protein 1 subunit beta		grey	NA	NA	0.373489	0.520755	0.594189	0.634062	0.572577	0.337006	0.402646	0.373779	NA	NA	NA	NA
PRKDC	P78527	DNA-dependent protein kinase catalytic subunit		grey	0.307335	0.268846	0.367357	0.541383	0.35094	0.374335	0.320033	0.345567	0.364595	0.354318	NA	NA	NA	NA
DCD	P81605	Dermcidin		grey	NA	NA	0.126256	NA	0.0804598	0.0820113	0.0703304	NA	NA	NA	NA	NA	NA	NA
MRPS22	P82650	28S ribosomal protein S22, mitochondrial		grey	NA	NA	0.379768	0.535983	0.389414	0.369487	NA	NA	0.529323	NA	NA	NA	NA	NA
MRPS35	P82673	28S ribosomal protein S35, mitochondrial		grey	NA	NA	NA	0.607607	NA	NA	NA	NA	NA	NA	NA	NA	NA	NA
MRPS5	P82675	28S ribosomal protein S5, mitochondrial		grey	NA	NA	NA	NA	NA	NA	0.367741	NA	NA	0.445559	NA	NA	NA	NA
MRPS34	P82930	28S ribosomal protein S34, mitochondrial		grey	NA	NA	0.422483	0.549864	NA	NA	NA	NA	NA	NA	NA	NA	NA	NA
MRPS9	P82933	28S ribosomal protein S9, mitochondrial		grey	NA	NA	NA	NA	0.443743	0.449427	0.416222	0.492633	0.476094	0.407123	NA	NA	NA	NA
SARNP	H0YHG0, P82979	Uncharacterized protein, SAP domain-containing ribonucleoprotein		grey	NA	NA	NA	NA	NA	NA	NA	NA	NA	NA	0.918214	0.682872	0.329201	0.0456786
RPL24	P83731	60S ribosomal protein L24		grey	NA	0.277716	0.426326	0.524604	0.375944	0.422709	0.396791	0.369296	0.409266	0.374496	0.900168	0.764451	0.573433	0.376555
ERH	P84090	Enhancer of rudimentary homolog		grey	NA	NA	0.338462	0.60179	0.186224	0.127346	NA	0.312819	0.281072	NA	0.907874	0.78098	0.453334	0.151449
RPL19	P84098	60S ribosomal protein L19		grey	NA	NA	NA	NA	0.36899	0.390768	0.377881	0.638885	0.699031	0.669225	0.901442	0.404606	0.272262	0.139067
SRSF3	P84103	Serine/arginine-rich splicing factor 3		grey	NA	NA	0.417643	0.697652	0.283893	0.174243	NA	0.495775	0.43877	NA	0.918567	0.570981	0.218219	0.062553
RBM10	P98175	RNA-binding protein 10		grey	NA	NA	NA	NA	NA	NA	NA	NA	NA	NA	NA	NA	NA	0.203403
SLC25A3	Q00325	Phosphate carrier protein, mitochondrial		grey	NA	0.250595	0.386537	0.564659	0.360716	0.373316	0.335769	0.377788	0.379918	0.365949	NA	NA	NA	NA
CLTC	Q00610	Clathrin heavy chain 1		grey	NA	0.268853	NA	NA	0.492865	0.552653	0.502512	0.352332	0.418811	0.371378	NA	NA	NA	NA

## Sheet: Integration distance matrix
Genes	ORF1	ORF2	HAX1	IPO7	TUBB	HSP90AA1	HSP90AB1	PARP1	HSPA1A, HSPA1B	HSPA8	TOP1	PABPC1	PCNA	NAP1L1	UBB, UBC, RPS27A, UBA52	TUBB4B	PURA	FKBP4	PABPC4	UPF1	HMCES	PURB	ZCCHC3	MOV10	HIST1H2BJ, HIST1H2BO, HIST1H2BB, HIST2H2BE	TROVE2	DDX6	YME1L1	NAP1L4	LARP7	MEPCE
ORF1	0	0.746	0.8852	0.8851	0.76147	0.79774	0.78842	0.81472	0.82133	0.81269	0.92864	0.54262	0.9066	0.88765	0.78086	0.76244	0.88858	0.87975	0.55479	0.61644	0.89154	0.91148	0.67084	0.61978	0.84299	0.8675	0.8914	0.8752	0.88603	0.87305	0.84734
ORF2	0.746	0	0.80984	0.77666	0.57246	0.67235	0.65241	0.75493	0.73393	0.7276	0.8771	0.67348	0.83129	0.78221	0.63229	0.5727	0.80679	0.81585	0.66494	0.61931	0.86003	0.83917	0.58982	0.69909	0.80237	0.83285	0.87877	0.83498	0.81725	0.8305	0.83334
HAX1	0.8852	0.80984	0	0.47059	0.73937	0.77925	0.78098	0.83498	0.81186	0.81111	0.8517	0.86667	0.71855	0.5432	0.81101	0.75564	0.7669	0.64106	0.86436	0.83192	0.83479	0.71708	0.82893	0.85882	0.86975	0.75275	0.83394	0.70755	0.76393	0.96043	1
IPO7	0.8851	0.77666	0.47059	0	0.69367	0.71933	0.70748	0.80866	0.85544	0.85745	0.81283	0.86242	0.65815	0.4008	0.77678	0.68586	0.72833	0.63012	0.85906	0.82395	0.78619	0.64702	0.82372	0.86214	0.82987	0.7406	0.79274	0.74232	0.6641	0.93354	1
TUBB	0.76147	0.57246	0.73937	0.69367	0	0.57386	0.47605	0.75216	0.62598	0.62508	0.90895	0.70137	0.86689	0.74818	0.61171	0.12176	0.83328	0.71292	0.69818	0.63098	0.87612	0.86827	0.64696	0.72528	0.77957	0.78541	0.85021	0.77763	0.77955	0.78006	0.74648
HSP90AA1	0.79774	0.67235	0.77925	0.71933	0.57386	0	0.41123	0.6983	0.72224	0.72973	0.88227	0.75725	0.83107	0.70793	0.58098	0.55859	0.78964	0.73928	0.75193	0.69345	0.83874	0.82623	0.70757	0.77645	0.77536	0.82978	0.8335	0.83442	0.72865	0.77316	0.83042
HSP90AB1	0.78842	0.65241	0.78098	0.70748	0.47605	0.41123	0	0.70282	0.6854	0.69295	0.88836	0.7405	0.84003	0.70066	0.55739	0.46187	0.79926	0.73394	0.73611	0.66917	0.84803	0.83727	0.69143	0.75802	0.76242	0.82781	0.82195	0.82868	0.70194	0.74558	0.76787
PARP1	0.81472	0.75493	0.83498	0.80866	0.75216	0.6983	0.70282	0	0.84174	0.84199	0.72498	0.77831	0.71717	0.80781	0.58904	0.74877	0.69415	0.84924	0.77103	0.72807	0.78212	0.72667	0.74349	0.78142	0.79785	0.87695	0.85275	0.87808	0.8454	0.76055	0.82214
HSPA1A, HSPA1B	0.82133	0.73393	0.81186	0.85544	0.62598	0.72224	0.6854	0.84174	0	0.18306	0.96531	0.78851	0.9283	0.86241	0.75566	0.63163	0.89737	0.84576	0.78934	0.75006	0.94139	0.92831	0.75652	0.78369	0.85386	0.88603	0.92084	0.88395	0.90289	0.79868	0.67255
HSPA8	0.81269	0.7276	0.81111	0.85745	0.62508	0.72973	0.69295	0.84199	0.18306	0	0.96513	0.77887	0.92889	0.86632	0.7554	0.63271	0.8988	0.84606	0.78013	0.74175	0.94336	0.9299	0.74614	0.77307	0.85699	0.88867	0.91656	0.87918	0.90658	0.80539	0.66967
TOP1	0.92864	0.8771	0.8517	0.81283	0.90895	0.88227	0.88836	0.72498	0.96531	0.96513	0	0.9107	0.63397	0.8172	0.82399	0.90709	0.71712	0.8781	0.90585	0.8859	0.78366	0.67508	0.87633	0.90844	0.85675	0.81202	0.83488	0.79715	0.70405	0.73043	1
PABPC1	0.54262	0.67348	0.86667	0.86242	0.70137	0.75725	0.7405	0.77831	0.78851	0.77887	0.9107	0	0.88624	0.86411	0.72773	0.70259	0.86635	0.86318	0	0.54983	0.86882	0.89299	0.64026	0.64447	0.8166	0.84836	0.86985	0.85249	0.86703	0.84719	0.81613
PCNA	0.9066	0.83129	0.71855	0.65815	0.86689	0.83107	0.84003	0.71717	0.9283	0.92889	0.63397	0.88624	0	0.67389	0.7562	0.8646	0.55205	0.79465	0.88108	0.85075	0.77673	0.36173	0.843	0.87634	0.82385	0.81587	0.81672	0.81387	0.74686	0.79485	1
NAP1L1	0.88765	0.78221	0.5432	0.4008	0.74818	0.70793	0.70066	0.80781	0.86241	0.86632	0.8172	0.86411	0.67389	0	0.77439	0.73498	0.72723	0.63834	0.86024	0.82462	0.77896	0.64784	0.83147	0.86557	0.83835	0.76893	0.79973	0.77447	0.6263	0.91508	1
UBB, UBC, RPS27A, UBA52	0.78086	0.63229	0.81101	0.77678	0.61171	0.58098	0.55739	0.58904	0.75566	0.7554	0.82399	0.72773	0.7562	0.77439	0	0.60513	0.71937	0.81808	0.71926	0.63524	0.82146	0.76667	0.64307	0.71376	0.70909	0.84986	0.79495	0.85504	0.81702	0.74415	0.75239
TUBB4B	0.76244	0.5727	0.75564	0.68586	0.12176	0.55859	0.46187	0.74877	0.63163	0.63271	0.90709	0.70259	0.8646	0.73498	0.60513	0	0.83056	0.69257	0.69885	0.63387	0.87086	0.86524	0.65212	0.7296	0.77842	0.79514	0.85254	0.79231	0.76172	0.77468	0.73833
PURA	0.88858	0.80679	0.7669	0.72833	0.83328	0.78964	0.79926	0.69415	0.89737	0.8988	0.71712	0.86635	0.55205	0.72723	0.71937	0.83056	0	0.80843	0.86096	0.82527	0.79377	0.54599	0.81984	0.85293	0.79895	0.83634	0.81723	0.8385	0.78237	0.79812	0.91546
FKBP4	0.87975	0.81585	0.64106	0.63012	0.71292	0.73928	0.73394	0.84924	0.84576	0.84606	0.8781	0.86318	0.79465	0.63834	0.81808	0.69257	0.80843	0	0.86121	0.83254	0.82341	0.79126	0.83955	0.86818	0.87489	0.80615	0.83171	0.7596	0.74167	0.93203	1
PABPC4	0.55479	0.66494	0.86436	0.85906	0.69818	0.75193	0.73611	0.77103	0.78934	0.78013	0.90585	0	0.88108	0.86024	0.71926	0.69885	0.86096	0.86121	0	0.5389	0.86316	0.88793	0.63365	0.6423	0.81167	0.84758	0.86868	0.85386	0.86358	0.84411	0.8183
UPF1	0.61644	0.61931	0.83192	0.82395	0.63098	0.69345	0.66917	0.72807	0.75006	0.74175	0.8859	0.54983	0.85075	0.82462	0.63524	0.63387	0.82527	0.83254	0.5389	0	0.84566	0.85653	0.48023	0.56247	0.77283	0.83991	0.84041	0.84692	0.84321	0.82132	0.7881
HMCES	0.89154	0.86003	0.83479	0.78619	0.87612	0.83874	0.84803	0.78212	0.94139	0.94336	0.78366	0.86882	0.77673	0.77896	0.82146	0.87086	0.79377	0.82341	0.86316	0.84566	0	0.77259	0.87049	0.89309	0.82629	0.83967	0.82255	0.8679	0.78176	0.69182	1
PURB	0.91148	0.83917	0.71708	0.64702	0.86827	0.82623	0.83727	0.72667	0.92831	0.9299	0.67508	0.89299	0.36173	0.64784	0.76667	0.86524	0.54599	0.79126	0.88793	0.85653	0.77259	0	0.85199	0.88319	0.84848	0.81535	0.81491	0.8259	0.74311	0	1
ZCCHC3	0.67084	0.58982	0.82893	0.82372	0.64696	0.70757	0.69143	0.74349	0.75652	0.74614	0.87633	0.64026	0.843	0.83147	0.64307	0.65212	0.81984	0.83955	0.63365	0.48023	0.87049	0.85199	0	0.57042	0.79636	0.85549	0.86822	0.86139	0.86306	0.84548	0.82373
MOV10	0.61978	0.69909	0.85882	0.86214	0.72528	0.77645	0.75802	0.78142	0.78369	0.77307	0.90844	0.64447	0.87634	0.86557	0.71376	0.7296	0.85293	0.86818	0.6423	0.56247	0.89309	0.88319	0.57042	0	0.80955	0.86456	0.86286	0.87149	0.88167	0.84488	0.78397
HIST1H2BJ, HIST1H2BO, HIST1H2BB, HIST2H2BE	0.84299	0.80237	0.86975	0.82987	0.77957	0.77536	0.76242	0.79785	0.85386	0.85699	0.85675	0.8166	0.82385	0.83835	0.70909	0.77842	0.79895	0.87489	0.81167	0.77283	0.82629	0.84848	0.79636	0.80955	0	0.85815	0.85851	0.89001	0.8376	0.80544	0.76495
TROVE2	0.8675	0.83285	0.75275	0.7406	0.78541	0.82978	0.82781	0.87695	0.88603	0.88867	0.81202	0.84836	0.81587	0.76893	0.84986	0.79514	0.83634	0.80615	0.84758	0.83991	0.83967	0.81535	0.85549	0.86456	0.85815	0	0.83813	0.75428	0.69001	0.9628	1
DDX6	0.8914	0.87877	0.83394	0.79274	0.85021	0.8335	0.82195	0.85275	0.92084	0.91656	0.83488	0.86985	0.81672	0.79973	0.79495	0.85254	0.81723	0.83171	0.86868	0.84041	0.82255	0.81491	0.86822	0.86286	0.85851	0.83813	0	0.73391	0.76754	0.86635	0.84547
YME1L1	0.8752	0.83498	0.70755	0.74232	0.77763	0.83442	0.82868	0.87808	0.88395	0.87918	0.79715	0.85249	0.81387	0.77447	0.85504	0.79231	0.8385	0.7596	0.85386	0.84692	0.8679	0.8259	0.86139	0.87149	0.89001	0.75428	0.73391	0	0.71174	0.95675	1
NAP1L4	0.88603	0.81725	0.76393	0.6641	0.77955	0.72865	0.70194	0.8454	0.90289	0.90658	0.70405	0.86703	0.74686	0.6263	0.81702	0.76172	0.78237	0.74167	0.86358	0.84321	0.78176	0.74311	0.86306	0.88167	0.8376	0.69001	0.76754	0.71174	0	0.91563	1
LARP7	0.87305	0.8305	0.96043	0.93354	0.78006	0.77316	0.74558	0.76055	0.79868	0.80539	0.73043	0.84719	0.79485	0.91508	0.74415	0.77468	0.79812	0.93203	0.84411	0.82132	0.69182	0	0.84548	0.84488	0.80544	0.9628	0.86635	0.95675	0.91563	0	0.70453
MEPCE	0.84734	0.83334	1	1	0.74648	0.83042	0.76787	0.82214	0.67255	0.66967	1	0.81613	1	1	0.75239	0.73833	0.91546	1	0.8183	0.7881	1	1	0.82373	0.78397	0.76495	1	0.84547	1	1	0.70453	0

## Sheet: Raw
PROTEIN IDS	PEPTIDES TANDEM_EXP1	RAZOR + UNIQUE PEPTIDES TANDEM_EXP1	RATIO H/L TANDEM_EXP1	PEPTIDES TANDEM_EXP2	RAZOR + UNIQUE PEPTIDES TANDEM_EXP2	RATIO H/L TANDEM_EXP2	PEPTIDES RNASE_EXP1	RAZOR + UNIQUE PEPTIDES RNASE_EXP1	RATIO H/L RNASE_EXP1	PEPTIDES RNASE_EXP2	RAZOR + UNIQUE PEPTIDES RNASE_EXP2	RATIO H/L RNASE_EXP2	PEPTIDES EN_EXP2	RAZOR + UNIQUE PEPTIDES EN_EXP2	RATIO H/L EN_EXP2	PEPTIDES EN_EXP3	RAZOR + UNIQUE PEPTIDES EN_EXP3	RATIO H/L EN_EXP3	PEPTIDES RT_EXP2	RAZOR + UNIQUE PEPTIDES RT_EXP2	RATIO H/L RT_EXP2	PEPTIDES RT_EXP3	RAZOR + UNIQUE PEPTIDES RT_EXP3	RATIO H/L RT_EXP3	PEPTIDES EN_EXP1	RAZOR + UNIQUE PEPTIDES EN_EXP1	RATIO H/L EN_EXP1	PEPTIDES RT_EXP1	RAZOR + UNIQUE PEPTIDES RT_EXP1	RATIO H/L RT_EXP1	PEPTIDES EXCHANGE_30_MINUTES	RAZOR + UNIQUE PEPTIDES EXCHANGE_30_MINUTES	RATIO H/L EXCHANGE_30_MINUTES	PEPTIDES EXCHANGE_0_POINT	RAZOR + UNIQUE PEPTIDES EXCHANGE_0_POINT	RATIO H/L EXCHANGE_0_POINT	PEPTIDES EXCHANGE_5_MINUTES	RAZOR + UNIQUE PEPTIDES EXCHANGE_5_MINUTES	RATIO H/L EXCHANGE_5_MINUTES	PEPTIDES EXCHANGE_30_SECONDS	RAZOR + UNIQUE PEPTIDES EXCHANGE_30_SECONDS	RATIO H/L EXCHANGE_30_SECONDS	SCORE	POTENTIAL CONTAMINANT	REVERSE
CON__A2A4G1	5	0	NA	6	0	NA	6	0	NA	6	0	NA	5	0	NA	3	0	NA	4	0	NA	6	0	NA	6	0	NA	6	0	NA	7	0	NA	5	0	NA	6	0	NA	5	0	NA	-2	+
sp|Q9H4B7|TBB1_HUMAN;CON__ENSEMBL:ENSBTAP00000025008	3	0	NA	4	0	NA	3	0	NA	4	0	NA	5	0	NA	5	0	NA	5	0	NA	5	0	NA	5	0	NA	6	1	1.0424	4	0	NA	3	0	NA	3	0	NA	2	0	NA	-2	+
CON__ENSEMBL:ENSBTAP00000038253	7	1	NA	8	0	NA	5	0	NA	8	0	NA	8	0	NA	7	0	NA	7	0	NA	8	0	NA	9	1	1.5939	8	1	1.1725	6	0	NA	6	0	NA	5	0	NA	4	0	NA	2.455	+
sp|O43790|KRT86_HUMAN;CON__O43790;CON__Q14533;sp|Q14533|KRT81_HUMAN	0	0	NA	0	0	NA	0	0	NA	1	0	NA	0	0	NA	0	0	NA	0	0	NA	0	0	NA	0	0	NA	0	0	NA	0	0	NA	7	0	NA	0	0	NA	0	0	NA	-2	+
sp|O76013|KRT36_HUMAN;CON__O76013	1	0	NA	1	0	NA	1	0	NA	1	0	NA	1	0	NA	1	0	NA	1	0	NA	1	0	NA	1	0	NA	1	0	NA	1	0	NA	2	0	NA	0	0	NA	1	0	NA	3.0696	+
sp|O95678|K2C75_HUMAN;CON__O95678	3	0	NA	8	0	NA	4	0	NA	8	0	NA	5	0	NA	2	0	NA	4	0	NA	2	0	NA	5	0	NA	3	0	NA	8	0	NA	6	1	0.27514	6	0	NA	3	0	NA	2.2577	+
CON__P00761;sp|Q9BYE2|TMPSD_HUMAN	4	4	0.008216	4	4	0.0079616	4	4	0.028444	4	4	0.0054108	3	3	0.0015083	3	3	0.0023001	4	4	0.00083456	4	4	0.00073494	3	3	0.0049741	3	3	0.0029232	4	4	0.002821	3	3	0.00016516	4	4	0.0015826	4	4	0.0012366	323.31	+
sp|P02533|K1C14_HUMAN;CON__P02533;CON__Q61782	14	7	0.19486	18	8	0.023683	17	7	0.10735	20	11	0.066711	11	4	0.12229	10	5	NA	9	4	NA	13	6	0.082369	16	6	0.10054	16	6	0.06219	24	11	0.10564	20	11	0.07264	18	7	0.054176	9	3	0.10202	323.31	+
CON__P02535-1	8	0	NA	8	0	NA	9	0	NA	10	0	NA	9	0	NA	9	0	NA	7	0	NA	10	0	NA	9	0	NA	8	0	NA	10	0	NA	9	0	NA	9	0	NA	9	0	NA	-2	+
sp|P02538|K2C6A_HUMAN;CON__P02538	9	4	0.18119	24	17	0.076576	20	16	0.094772	19	11	0.07977	11	4	0.065567	6	2	0.16683	9	3	0.067912	9	4	0.083352	16	10	0.10819	10	5	0.019406	29	24	0.060453	12	7	0.90413	20	15	0.12889	6	1	0.12031	323.31	+
CON__P02662	2	2	0.1088	0	0	NA	0	0	NA	4	4	0.046865	0	0	NA	0	0	NA	1	1	NA	2	2	0.076408	2	2	0.087177	1	1	0.050495	0	0	NA	2	2	NA	0	0	NA	0	0	NA	102.44	+
CON__P02663	0	0	NA	0	0	NA	0	0	NA	0	0	NA	0	0	NA	0	0	NA	0	0	NA	0	0	NA	0	0	NA	0	0	NA	0	0	NA	3	3	0.0073417	0	0	NA	0	0	NA	26.054	+
CON__P02666	0	0	NA	1	1	0.096153	1	1	0.10574	1	1	0.014897	0	0	NA	0	0	NA	0	0	NA	1	1	0.015396	1	1	0.15131	1	1	0.10143	0	0	NA	1	1	3.2714	0	0	NA	0	0	NA	55.046	+
CON__P02668	0	0	NA	1	1	0.097087	0	0	NA	0	0	NA	0	0	NA	0	0	NA	0	0	NA	0	0	NA	0	0	NA	0	0	NA	0	0	NA	1	1	NA	0	0	NA	0	0	NA	10.632	+
CON__P02754	0	0	NA	0	0	NA	0	0	NA	0	0	NA	0	0	NA	0	0	NA	0	0	NA	0	0	NA	0	0	NA	0	0	NA	0	0	NA	3	3	0.21721	0	0	NA	0	0	NA	145.07	+
sp|P02768|ALBU_HUMAN;CON__P02768-1	5	0	NA	6	1	NA	3	0	NA	2	0	NA	0	0	NA	1	0	NA	0	0	NA	1	0	NA	1	0	NA	1	0	NA	2	0	NA	2	0	NA	1	0	NA	1	0	NA	24.376	+
CON__P02769	58	58	0.015496	55	55	0.0083098	18	18	0.073179	24	24	0.11027	1	1	NA	1	1	0.078384	0	0	NA	2	2	NA	12	12	0.090921	9	9	0.11129	10	10	0.17638	15	15	0.14595	12	12	0.33084	14	14	0.14869	323.31	+
sp|P05787|K2C8_HUMAN;CON__P05787;CON__H-INV:HIT000292931;CON__Q9DCV7;CON__H-INV:HIT000016045;CON__REFSEQ:XP_092267	3	0	NA	4	0	NA	4	0	NA	7	0	NA	5	0	NA	4	0	NA	4	0	NA	4	0	NA	5	0	NA	4	0	NA	5	0	NA	5	0	NA	4	0	NA	3	0	NA	33.729	+
sp|P08727|K1C19_HUMAN;CON__P08727	3	0	NA	6	1	0.25488	4	0	NA	4	0	NA	3	0	NA	2	0	NA	3	1	NA	4	0	NA	4	0	NA	4	0	NA	8	0	NA	4	0	NA	4	0	NA	4	0	NA	21.35	+
sp|P08729|K2C7_HUMAN;CON__Q3KNV1;CON__P08729	1	0	NA	1	0	NA	2	0	NA	3	0	NA	4	0	NA	3	0	NA	3	0	NA	2	0	NA	3	0	NA	2	0	NA	3	0	NA	4	0	NA	2	0	NA	2	0	NA	12.856	+
sp|P08779|K1C16_HUMAN;CON__P08779;CON__Q9D312;sp|Q8N1A0|KT222_HUMAN;CON__Q8N1A0	7	4	0.066915	24	21	0.035611	18	15	0.054241	12	8	0.072833	12	9	0.24915	6	3	0.071986	5	2	0.082161	7	3	0.057363	15	12	0.093504	13	10	0.11922	31	27	0.033754	9	7	0.032729	17	14	0.30626	6	3	NA	323.31	+
sp|P13645|K1C10_HUMAN;CON__P13645;sp|Q2M2I5|K1C24_HUMAN;CON__Q2M2I5;CON__A2AB72	30	30	0.022805	31	31	0.020567	27	27	0.023255	34	34	0.0101	26	26	0.027816	27	27	0.057397	22	22	0.058028	28	28	0.021716	27	27	0.01261	26	26	0.015144	21	21	0.029774	23	23	0.025379	21	21	0.036354	21	21	0.044452	323.31	+
CON__P13646-1	5	0	NA	5	0	NA	5	0	NA	6	2	0.061467	5	0	NA	3	0	NA	11	7	0.14235	4	0	NA	4	0	NA	5	1	0.19669	5	0	NA	5	1	0.0014515	5	0	NA	3	0	NA	124.1	+
sp|P13647|K2C5_HUMAN;CON__P13647	11	5	0.27199	17	7	0.098073	14	7	0.11514	30	17	0.064063	12	4	0.069361	6	3	0.055381	8	2	0.065568	15	8	0.058317	19	10	0.098461	15	9	0.063712	25	17	0.081985	23	14	0.038666	17	9	0.039045	11	6	0.043475	323.31	+
sp|P19013|K2C4_HUMAN;CON__P19013	2	0	NA	4	2	0.071307	1	0	NA	2	0	NA	2	0	NA	2	0	NA	2	0	NA	1	0	NA	2	0	NA	2	1	NA	3	2	0.1356	3	1	NA	1	0	NA	2	0	NA	279.07	+
sp|P20930|FILA_HUMAN;CON__P20930	0	0	NA	0	0	NA	0	0	NA	3	3	0.045999	0	0	NA	0	0	NA	0	0	NA	0	0	NA	0	0	NA	0	0	NA	0	0	NA	1	1	NA	1	1	NA	0	0	NA	3.8911	+
CON__P35908;CON__REFSEQ:XP_932229	24	0	NA	32	1	0.025632	21	0	NA	40	1	NA	34	0	NA	24	1	NA	28	0	NA	40	1	NA	28	0	NA	30	0	NA	23	0	NA	21	0	NA	20	0	NA	15	0	NA	141.08	+
sp|P48668|K2C6C_HUMAN;CON__P48668	9	0	NA	23	0	NA	19	0	NA	19	0	NA	11	0	NA	6	0	NA	9	0	NA	9	0	NA	15	0	NA	10	0	NA	29	1	NA	12	0	NA	20	0	NA	6	0	NA	4.1704	+
CON__P50446	3	0	NA	12	0	NA	10	0	NA	11	0	NA	5	0	NA	2	0	NA	5	1	NA	2	0	NA	6	0	NA	5	0	NA	19	0	NA	7	0	NA	12	0	NA	3	0	NA	13.345	+
sp|P78386|KRT85_HUMAN;CON__P78386	0	0	NA	0	0	NA	0	0	NA	1	0	NA	0	0	NA	0	0	NA	0	0	NA	0	0	NA	0	0	NA	0	0	NA	0	0	NA	5	0	NA	0	0	NA	0	0	NA	32.031	+
sp|Q04695|K1C17_HUMAN;CON__Q04695;CON__Q99PS0	5	0	NA	11	4	0.11043	9	2	0.11344	8	0	NA	6	0	NA	3	0	NA	4	0	NA	6	1	0.24995	8	0	NA	9	1	NA	18	7	0.072582	12	2	0.19789	9	0	NA	5	0	NA	323.31	+
sp|Q14525|KT33B_HUMAN;CON__Q14525	1	0	NA	1	0	NA	1	0	NA	1	0	NA	1	0	NA	1	0	NA	1	0	NA	1	0	NA	1	0	NA	1	0	NA	1	0	NA	5	1	NA	0	0	NA	1	0	NA	3.2841	+
sp|Q15323|K1H1_HUMAN;CON__Q9UE12;CON__Q15323;sp|Q14532|K1H2_HUMAN;CON__Q14532	1	0	NA	1	0	NA	1	0	NA	1	0	NA	1	0	NA	1	0	NA	1	0	NA	1	0	NA	1	0	NA	1	0	NA	1	0	NA	4	3	0.33542	0	0	NA	1	0	NA	246.56	+
sp|Q86Y46|K2C73_HUMAN;CON__Q32MB2;sp|Q7RTS7|K2C74_HUMAN;CON__Q7RTS7	2	1	0.058675	4	1	NA	3	1	0.099433	4	1	0.024112	5	1	0.27096	2	1	0.31472	4	1	0.53765	2	1	0.16109	3	1	NA	3	1	NA	6	1	NA	5	1	NA	5	1	NA	4	1	NA	133.11	+
sp|Q3SY84|K2C71_HUMAN;CON__Q3SY84	2	0	NA	2	0	NA	2	0	NA	2	0	NA	3	0	NA	2	0	NA	3	0	NA	2	0	NA	3	0	NA	2	0	NA	4	0	NA	4	0	NA	3	0	NA	3	0	NA	14.161	+
CON__Q9Z2K1;CON__Q3ZAW8	5	0	NA	8	0	NA	7	0	NA	4	0	NA	6	0	NA	2	0	NA	3	0	NA	3	0	NA	7	0	NA	6	0	NA	12	0	NA	5	0	NA	5	0	NA	4	0	NA	-2	+
CON__Q497I4	1	0	NA	1	0	NA	1	0	NA	1	0	NA	1	0	NA	1	0	NA	1	0	NA	1	0	NA	1	0	NA	1	0	NA	1	0	NA	3	0	NA	0	0	NA	1	0	NA	-2	+
sp|Q5D862|FILA2_HUMAN;CON__Q5D862	1	1	NA	1	1	NA	2	2	0.82817	3	3	0.15404	2	2	NA	2	2	NA	2	2	NA	5	5	NA	1	1	NA	1	1	NA	1	1	11.688	1	1	0.27467	0	0	NA	1	1	NA	307.26	+
sp|Q5XKE5|K2C79_HUMAN;CON__Q5XKE5	3	0	NA	3	0	NA	4	0	NA	6	0	NA	4	0	NA	2	0	NA	3	0	NA	4	0	NA	6	0	NA	5	0	NA	4	0	NA	5	0	NA	4	0	NA	3	0	NA	-2	+
CON__Q5XQN5;CON__Q922U2	8	0	NA	12	0	NA	11	0	NA	23	0	NA	9	0	NA	6	0	NA	6	0	NA	11	0	NA	16	0	NA	14	0	NA	21	0	NA	19	0	NA	15	0	NA	9	0	NA	-2	+
CON__Q61726	0	0	NA	0	0	NA	0	0	NA	1	0	NA	0	0	NA	0	0	NA	0	0	NA	0	0	NA	0	0	NA	0	0	NA	0	0	NA	4	0	NA	0	0	NA	0	0	NA	82.063	+
sp|Q9NSB2|KRT84_HUMAN;CON__Q9NSB2;CON__Q6ISB0	1	0	NA	1	0	NA	2	0	NA	3	0	NA	3	0	NA	2	0	NA	3	0	NA	2	0	NA	3	0	NA	2	0	NA	3	0	NA	4	0	NA	2	0	NA	2	0	NA	10.296	+
sp|Q6KB66|K2C80_HUMAN;CON__Q6KB66-1;CON__Q0VBK2	0	0	NA	0	0	NA	0	0	NA	0	0	NA	0	0	NA	0	0	NA	0	0	NA	1	1	NA	0	0	NA	0	0	NA	0	0	NA	0	0	NA	0	0	NA	0	0	NA	9.2966	+
sp|P78385|KRT83_HUMAN;CON__Q6NT21;CON__P78385;sp|A6NCN2|KR87P_HUMAN	0	0	NA	0	0	NA	0	0	NA	1	0	NA	0	0	NA	0	0	NA	0	0	NA	0	0	NA	0	0	NA	0	0	NA	0	0	NA	8	7	0.092569	0	0	NA	0	0	NA	197.2	+
sp|Q8N1N4|K2C78_HUMAN;CON__Q8N1N4-2;CON__Q7RTT2	0	0	NA	1	0	NA	1	0	NA	7	5	0.13023	1	0	NA	0	0	NA	1	0	NA	0	0	NA	0	0	NA	1	1	0.11949	2	1	NA	2	0	NA	1	0	NA	1	0	NA	40.419	+
sp|Q7Z3Y7|K1C28_HUMAN;CON__Q7Z3Y7;CON__Q148H6	4	0	NA	4	0	NA	4	0	NA	4	0	NA	3	0	NA	3	0	NA	3	0	NA	3	0	NA	4	0	NA	4	0	NA	3	0	NA	3	0	NA	2	0	NA	3	0	NA	-2	+
sp|Q7Z3Y8|K1C27_HUMAN;CON__Q7Z3Y8	2	0	NA	2	0	NA	2	0	NA	2	0	NA	2	0	NA	2	0	NA	2	0	NA	2	0	NA	2	0	NA	2	0	NA	2	0	NA	2	0	NA	2	0	NA	2	0	NA	28.28	+
sp|Q7Z3Y9|K1C26_HUMAN;CON__Q7Z3Y9	1	0	NA	1	0	NA	1	0	NA	1	0	NA	1	0	NA	1	0	NA	1	0	NA	1	0	NA	1	0	NA	1	0	NA	1	0	NA	1	0	NA	1	0	NA	1	0	NA	-2	+
sp|Q7Z3Z0|K1C25_HUMAN;CON__Q7Z3Z0	2	0	NA	2	0	NA	2	0	NA	2	0	NA	2	0	NA	2	0	NA	2	0	NA	2	0	NA	2	0	NA	2	0	NA	2	0	NA	2	0	NA	2	0	NA	2	0	NA	-2	+
sp|Q7Z794|K2C1B_HUMAN;CON__Q7Z794	3	0	NA	3	0	NA	2	0	NA	3	0	NA	3	0	NA	2	0	NA	3	0	NA	2	0	NA	5	2	0.28448	2	0	NA	3	0	NA	2	0	NA	2	0	NA	2	0	NA	136.44	+
sp|Q86YZ3|HORN_HUMAN;CON__Q86YZ3	2	2	NA	4	4	0.060145	0	0	NA	1	1	0.0045087	2	2	NA	5	5	NA	4	4	NA	4	4	NA	1	1	0.69332	2	2	NA	1	1	NA	1	1	NA	1	1	NA	0	0	NA	323.31	+
CON__Q8BGZ7	3	0	NA	9	1	0.2538	5	0	NA	8	0	NA	5	0	NA	2	0	NA	4	0	NA	2	0	NA	5	0	NA	3	0	NA	9	0	NA	6	1	0.075918	7	0	NA	3	0	NA	-2	+
CON__Q92764;sp|Q92764|KRT35_HUMAN	1	0	NA	1	0	NA	1	0	NA	1	0	NA	1	0	NA	1	0	NA	1	0	NA	1	0	NA	1	0	NA	1	0	NA	1	0	NA	2	1	NA	0	0	NA	1	0	NA	-2	+
CON__Q9H552	1	0	NA	1	0	NA	2	0	NA	3	0	NA	4	1	0.71318	3	0	NA	2	0	NA	2	0	NA	3	0	NA	2	0	NA	2	0	NA	2	0	NA	1	0	NA	1	0	NA	-2	+
sp|Q9NSB4|KRT82_HUMAN;CON__Q9NSB4	0	0	NA	0	0	NA	0	0	NA	0	0	NA	0	0	NA	0	0	NA	0	0	NA	0	0	NA	0	0	NA	0	0	NA	0	0	NA	1	1	0.070497	0	0	NA	0	0	NA	44.225	+
CON__REFSEQ:XP_986630;sp|O76014|KRT37_HUMAN;sp|O76015|KRT38_HUMAN;CON__O76015;CON__O76014	1	0	NA	1	0	NA	1	0	NA	1	0	NA	1	0	NA	1	0	NA	1	0	NA	1	0	NA	1	0	NA	1	0	NA	1	0	NA	4	2	0.0487	0	0	NA	1	0	NA	59.836	+
sp|Q9UN81|LORF1_HUMAN;Orf1-untagged(optimized):;Orf1-untagged(native):	20	20	10.688	21	21	0.021038	22	22	2.9126	33	33	0.18249	35	35	1.9031	31	31	1.91	37	37	0.52388	34	34	0.48287	23	23	1.7048	30	30	0.54744	18	18	4.0571	18	18	10.678	19	19	8.7648	18	18	20.474	323.31
Orf2-untagged(native):;sp|O00370|LORF2_HUMAN;tr|A0A0U1RRB7|A0A0U1RRB7_HUMAN;tr|A0A0U1RR15|A0A0U1RR15_HUMAN;sp|Q9H606|PRORY_HUMAN	103	0	NA	111	0	NA	98	0	NA	118	0	NA	144	0	NA	135	0	NA	139	0	NA	134	0	NA	115	0	NA	111	0	NA	42	0	NA	46	0	NA	46	0	NA	46	0	NA	37.173
Orf2-untagged(optimized):	106	106	0.25208	114	114	2.0303	100	100	0.52603	121	121	0.68058	146	146	1.1804	137	137	1.0555	141	141	1.0353	136	136	0.83771	117	117	1.1352	114	114	0.98393	42	42	9.8126	46	46	10.117	46	46	9.8437	46	46	10.185	323.31
REV__sp|Q8N1A0|KT222_HUMAN;REV__CON__Q8N1A0	0	0	NA	0	0	NA	0	0	NA	0	0	NA	0	0	NA	0	0	NA	0	0	NA	0	0	NA	1	1	0.49788	0	0	NA	0	0	NA	0	0	NA	0	0	NA	0	0	NA	-2	+	+
REV__sp|O00410|IPO5_HUMAN	0	0	NA	0	0	NA	0	0	NA	0	0	NA	0	0	NA	0	0	NA	0	0	NA	0	0	NA	0	0	NA	0	0	NA	0	0	NA	0	0	NA	0	0	NA	0	0	NA	-2		+
REV__sp|O43283|M3K13_HUMAN	0	0	NA	1	1	2.0864	1	1	0.47459	1	1	0.66315	0	0	NA	0	0	NA	0	0	NA	0	0	NA	0	0	NA	1	1	0.99829	0	0	NA	0	0	NA	0	0	NA	0	0	NA	2.5716		+
REV__sp|O60268|K0513_HUMAN	0	0	NA	0	0	NA	0	0	NA	0	0	NA	0	0	NA	0	0	NA	0	0	NA	0	0	NA	0	0	NA	0	0	NA	0	0	NA	0	0	NA	0	0	NA	0	0	NA	2.2768		+
REV__sp|P08581|MET_HUMAN	0	0	NA	0	0	NA	0	0	NA	0	0	NA	1	1	0.58745	0	0	NA	0	0	NA	0	0	NA	0	0	NA	0	0	NA	0	0	NA	0	0	NA	0	0	NA	0	0	NA	-2		+
REV__sp|P15884|ITF2_HUMAN	1	1	NA	0	0	NA	0	0	NA	0	0	NA	0	0	NA	0	0	NA	0	0	NA	0	0	NA	0	0	NA	0	0	NA	0	0	NA	0	0	NA	0	0	NA	0	0	NA	2.325		+
REV__sp|P46782|RS5_HUMAN	0	0	NA	0	0	NA	0	0	NA	0	0	NA	1	1	0.0012428	0	0	NA	0	0	NA	1	1	NA	0	0	NA	0	0	NA	0	0	NA	0	0	NA	0	0	NA	0	0	NA	-2		+
REV__sp|P49792|RBP2_HUMAN	0	0	NA	0	0	NA	1	1	3.2572	0	0	NA	0	0	NA	1	1	1.9885	1	1	0.58331	1	1	0.53912	1	1	1.8547	1	1	0.6162	0	0	NA	0	0	NA	0	0	NA	0	0	NA	3.1209		+
REV__tr|S4R438|S4R438_HUMAN;REV__sp|P52849|NDST2_HUMAN	0	0	NA	1	1	0.35633	0	0	NA	1	1	0.073186	1	1	0.46288	1	1	0.51706	1	1	0.30489	1	1	0.39324	1	1	0.50544	1	1	0.42619	0	0	NA	0	0	NA	1	1	0.50682	1	1	1.9142	3.355		+
REV__sp|Q03001|DYST_HUMAN	0	0	NA	0	0	NA	0	0	NA	1	1	0.070267	0	0	NA	0	0	NA	0	0	NA	0	0	NA	0	0	NA	0	0	NA	0	0	NA	0	0	NA	0	0	NA	0	0	NA	3.3486		+
REV__sp|Q5VT06|CE350_HUMAN	0	0	NA	0	0	NA	0	0	NA	0	0	NA	0	0	NA	0	0	NA	0	0	NA	2	2	0.47139	0	0	NA	0	0	NA	0	0	NA	0	0	NA	0	0	NA	0	0	NA	2.0553		+
REV__sp|Q5VZ52|MORN5_HUMAN	0	0	NA	0	0	NA	0	0	NA	0	0	NA	0	0	NA	0	0	NA	0	0	NA	0	0	NA	1	1	0.49788	0	0	NA	0	0	NA	0	0	NA	0	0	NA	0	0	NA	2.8492		+
REV__sp|Q66GS9|CP135_HUMAN	0	0	NA	0	0	NA	0	0	NA	0	0	NA	1	1	0.36338	1	1	0.37453	0	0	NA	0	0	NA	0	0	NA	0	0	NA	0	0	NA	0	0	NA	0	0	NA	0	0	NA	-2		+
REV__sp|Q6AI39|GSC1L_HUMAN	0	0	NA	0	0	NA	0	0	NA	0	0	NA	0	0	NA	0	0	NA	0	0	NA	0	0	NA	0	0	NA	0	0	NA	0	0	NA	0	0	NA	0	0	NA	0	0	NA	-2		+
REV__sp|Q6NUJ1|SAPL1_HUMAN	1	1	10.964	0	0	NA	1	1	2.429	1	1	0.17122	0	0	NA	0	0	NA	1	1	0.48036	0	0	NA	1	1	1.6216	1	1	0.56746	0	0	NA	0	0	NA	0	0	NA	0	0	NA	-2		+
REV__sp|Q6WQI6|HEPN1_HUMAN	0	0	NA	0	0	NA	0	0	NA	0	0	NA	0	0	NA	0	0	NA	0	0	NA	0	0	NA	0	0	NA	0	0	NA	0	0	NA	0	0	NA	0	0	NA	0	0	NA	-2		+
REV__sp|Q6ZNB7|ALKMO_HUMAN	0	0	NA	0	0	NA	0	0	NA	0	0	NA	0	0	NA	1	1	0.15721	0	0	NA	1	1	0.41449	1	1	0.25709	1	1	0.3669	0	0	NA	0	0	NA	0	0	NA	0	0	NA	2.6865		+
REV__sp|Q7Z745|MRO2B_HUMAN	0	0	NA	0	0	NA	0	0	NA	0	0	NA	0	0	NA	0	0	NA	0	0	NA	0	0	NA	0	0	NA	0	0	NA	0	0	NA	0	0	NA	0	0	NA	1	1	1.091	2.653		+
REV__sp|Q86TA1|MOB3B_HUMAN	0	0	NA	0	0	NA	0	0	NA	0	0	NA	0	0	NA	0	0	NA	0	0	NA	0	0	NA	0	0	NA	0	0	NA	0	0	NA	0	0	NA	0	0	NA	0	0	NA	-2		+
REV__sp|Q86W24|NAL14_HUMAN	1	1	0.26613	1	1	2.1479	1	1	0.66723	1	1	0.72495	1	1	1.1844	1	1	1.0479	1	1	1.0541	1	1	0.86994	1	1	1.1457	1	1	1.0288	0	0	NA	0	0	NA	0	0	NA	0	0	NA	11.301		+
REV__sp|Q86W54|SPA24_HUMAN	0	0	NA	0	0	NA	0	0	NA	0	0	NA	0	0	NA	0	0	NA	0	0	NA	0	0	NA	0	0	NA	0	0	NA	0	0	NA	0	0	NA	0	0	NA	0	0	NA	5.7091		+
REV__sp|Q8N655|CJ012_HUMAN	0	0	NA	0	0	NA	0	0	NA	0	0	NA	0	0	NA	0	0	NA	0	0	NA	0	0	NA	0	0	NA	0	0	NA	0	0	NA	0	0	NA	0	0	NA	0	0	NA	-2		+
REV__sp|Q8N944|AMER3_HUMAN	0	0	NA	0	0	NA	0	0	NA	1	1	0.016734	0	0	NA	0	0	NA	0	0	NA	0	0	NA	0	0	NA	0	0	NA	0	0	NA	0	0	NA	0	0	NA	0	0	NA	-2		+
REV__sp|Q8NEZ4|KMT2C_HUMAN	0	0	NA	0	0	NA	1	1	0.55437	0	0	NA	0	0	NA	0	0	NA	0	0	NA	0	0	NA	0	0	NA	0	0	NA	0	0	NA	0	0	NA	0	0	NA	0	0	NA	-2		+
REV__sp|Q8WXX0|DYH7_HUMAN	0	0	NA	0	0	NA	0	0	NA	0	0	NA	0	0	NA	0	0	NA	0	0	NA	0	0	NA	0	0	NA	0	0	NA	0	0	NA	0	0	NA	0	0	NA	0	0	NA	-2		+
REV__sp|Q8WZ42|TITIN_HUMAN	0	0	NA	0	0	NA	2	2	0.71445	0	0	NA	0	0	NA	1	1	1.3327	1	1	1.1903	0	0	NA	2	2	1.1766	1	1	0.47543	0	0	NA	0	0	NA	0	0	NA	0	0	NA	3.9043		+
REV__sp|Q92508|PIEZ1_HUMAN	0	0	NA	0	0	NA	0	0	NA	0	0	NA	0	0	NA	0	0	NA	0	0	NA	0	0	NA	0	0	NA	0	0	NA	0	0	NA	0	0	NA	0	0	NA	0	0	NA	2.2762		+
REV__sp|Q96AA8|JKIP2_HUMAN	0	0	NA	0	0	NA	0	0	NA	0	0	NA	0	0	NA	0	0	NA	0	0	NA	1	1	0.72877	0	0	NA	0	0	NA	0	0	NA	0	0	NA	0	0	NA	0	0	NA	2.9004		+
REV__sp|Q99519|NEUR1_HUMAN	0	0	NA	1	1	0.03503	0	0	NA	1	1	0.17785	0	0	NA	0	0	NA	2	2	0.75396	0	0	NA	0	0	NA	1	1	0.47998	0	0	NA	0	0	NA	0	0	NA	0	0	NA	1.9906		+
REV__sp|Q9H814|PHAX_HUMAN	0	0	NA	0	0	NA	0	0	NA	0	0	NA	0	0	NA	0	0	NA	0	0	NA	0	0	NA	0	0	NA	0	0	NA	0	0	NA	0	0	NA	0	0	NA	0	0	NA	1.9424		+
REV__sp|Q9HCJ5|ZSWM6_HUMAN;REV__sp|Q9P217|ZSWM5_HUMAN	0	0	NA	0	0	NA	0	0	NA	0	0	NA	0	0	NA	0	0	NA	0	0	NA	0	0	NA	0	0	NA	0	0	NA	0	0	NA	1	1	NA	1	1	1.5762	1	1	1.1422	2.2888		+
REV__sp|Q9P1A2|PP4RL_HUMAN	0	0	NA	0	0	NA	0	0	NA	0	0	NA	0	0	NA	0	0	NA	0	0	NA	1	1	11.801	0	0	NA	0	0	NA	0	0	NA	0	0	NA	0	0	NA	0	0	NA	-2		+
REV__sp|Q9ULH0|KDIS_HUMAN	0	0	NA	0	0	NA	0	0	NA	0	0	NA	0	0	NA	0	0	NA	0	0	NA	0	0	NA	0	0	NA	0	0	NA	0	0	NA	1	1	9.101	0	0	NA	0	0	NA	3.0351		+
sp|A0FGR8|ESYT2_HUMAN	0	0	NA	0	0	NA	0	0	NA	0	0	NA	0	0	NA	0	0	NA	0	0	NA	0	0	NA	0	0	NA	0	0	NA	0	0	NA	0	0	NA	0	0	NA	0	0	NA	2.6841
sp|A2RRP1|NBAS_HUMAN	0	0	NA	0	0	NA	0	0	NA	0	0	NA	0	0	NA	0	0	NA	0	0	NA	0	0	NA	1	1	0.30408	0	0	NA	0	0	NA	0	0	NA	0	0	NA	0	0	NA	2.9621
sp|A5YKK6|CNOT1_HUMAN	0	0	NA	0	0	NA	0	0	NA	0	0	NA	0	0	NA	0	0	NA	1	1	1.1311	0	0	NA	1	1	0.66092	1	1	1.2226	0	0	NA	0	0	NA	0	0	NA	0	0	NA	4.1233
sp|A6NDG6|PGP_HUMAN	0	0	NA	0	0	NA	0	0	NA	0	0	NA	0	0	NA	0	0	NA	0	0	NA	0	0	NA	0	0	NA	0	0	NA	0	0	NA	0	0	NA	0	0	NA	0	0	NA	46.374
sp|A6NDU8|CE051_HUMAN	0	0	NA	0	0	NA	0	0	NA	0	0	NA	0	0	NA	0	0	NA	0	0	NA	0	0	NA	0	0	NA	0	0	NA	0	0	NA	0	0	NA	0	0	NA	0	0	NA	6.7169
sp|Q8NHZ7|MB3L2_HUMAN;sp|A6NJ08|MB3L5_HUMAN;sp|A6NE82|MB3L3_HUMAN;sp|A6NDZ8|MB3L4_HUMAN	0	0	NA	0	0	NA	0	0	NA	0	0	NA	1	1	1.2407	0	0	NA	0	0	NA	0	0	NA	0	0	NA	0	0	NA	0	0	NA	0	0	NA	0	0	NA	0	0	NA	-2
sp|A6NHQ2|FBLL1_HUMAN	0	0	NA	1	0	NA	1	0	NA	1	0	NA	2	1	1.5783	2	1	1.2868	2	1	0.68595	2	1	0.68219	1	1	1.4393	2	1	0.71623	2	1	0.63386	1	1	NA	1	1	2.4755	1	1	8.0528	11.966
sp|A6NHR9|SMHD1_HUMAN	0	0	NA	0	0	NA	0	0	NA	0	0	NA	1	1	0.76669	1	1	1.2205	0	0	NA	0	0	NA	0	0	NA	1	1	0.64181	0	0	NA	0	0	NA	0	0	NA	0	0	NA	3.4034
sp|A6NIH7|U119B_HUMAN	0	0	NA	0	0	NA	0	0	NA	0	0	NA	0	0	NA	0	0	NA	0	0	NA	0	0	NA	0	0	NA	0	0	NA	0	0	NA	0	0	NA	0	0	NA	0	0	NA	4.843
tr|A0A0B4J2B8|A0A0B4J2B8_HUMAN;sp|A6NJS3|IV1U1_HUMAN	1	1	0.087387	1	1	0.14288	0	0	NA	0	0	NA	0	0	NA	0	0	NA	0	0	NA	0	0	NA	0	0	NA	0	0	NA	0	0	NA	0	0	NA	0	0	NA	0	0	NA	50.153
sp|A7E2V4|ZSWM8_HUMAN	0	0	NA	0	0	NA	0	0	NA	0	0	NA	0	0	NA	0	0	NA	0	0	NA	0	0	NA	0	0	NA	0	0	NA	0	0	NA	0	0	NA	0	0	NA	0	0	NA	-2
sp|A7MCY6|TBKB1_HUMAN	0	0	NA	0	0	NA	0	0	NA	0	0	NA	0	0	NA	0	0	NA	2	2	0.47782	3	3	0.16359	0	0	NA	0	0	NA	0	0	NA	0	0	NA	0	0	NA	0	0	NA	14.012
sp|A8MTZ0|BBIP1_HUMAN	0	0	NA	1	1	1.8853	0	0	NA	0	0	NA	0	0	NA	0	0	NA	0	0	NA	0	0	NA	0	0	NA	1	1	0.82584	0	0	NA	0	0	NA	0	0	NA	0	0	NA	-2
sp|P62308|RUXG_HUMAN;sp|A8MWD9|RUXGL_HUMAN	0	0	NA	0	0	NA	0	0	NA	0	0	NA	0	0	NA	0	0	NA	0	0	NA	0	0	NA	0	0	NA	0	0	NA	0	0	NA	0	0	NA	0	0	NA	0	0	NA	3.7388
sp|C9J6K1|CS081_HUMAN	1	1	0.2411	0	0	NA	0	0	NA	0	0	NA	0	0	NA	0	0	NA	0	0	NA	0	0	NA	0	0	NA	0	0	NA	0	0	NA	0	0	NA	0	0	NA	0	0	NA	-2
sp|E9PAV3|NACAM_HUMAN	0	0	NA	0	0	NA	0	0	NA	0	0	NA	2	2	0.53386	1	1	0.4515	1	1	NA	0	0	NA	1	1	0.43455	1	1	1.6253	0	0	NA	0	0	NA	0	0	NA	0	0	NA	108.36
sp|O00139|KIF2A_HUMAN;sp|Q99661|KIF2C_HUMAN	0	0	NA	0	0	NA	0	0	NA	0	0	NA	0	0	NA	0	0	NA	1	1	1.0706	0	0	NA	1	1	0.40664	0	0	NA	0	0	NA	0	0	NA	0	0	NA	0	0	NA	9.611
sp|O00148|DX39A_HUMAN	5	0	NA	6	0	NA	1	0	NA	3	0	NA	9	0	NA	7	0	NA	9	0	NA	8	1	2.0449	10	0	NA	9	0	NA	16	5	0.76059	18	6	29.839	18	6	2.5773	15	4	5.5231	69.276
sp|O00151|PDLI1_HUMAN	0	0	NA	0	0	NA	0	0	NA	0	0	NA	0	0	NA	0	0	NA	0	0	NA	0	0	NA	0	0	NA	0	0	NA	0	0	NA	0	0	NA	0	0	NA	0	0	NA	71.709
sp|O00159|MYO1C_HUMAN	0	0	NA	0	0	NA	0	0	NA	0	0	NA	0	0	NA	0	0	NA	0	0	NA	0	0	NA	0	0	NA	0	0	NA	0	0	NA	0	0	NA	0	0	NA	0	0	NA	3.052
sp|O00165|HAX1_HUMAN	3	3	0.1552	4	4	4.7778	9	9	0.54471	9	9	0.8393	13	13	0.48035	13	13	0.46492	11	11	0.58094	12	12	0.49513	7	7	0.45332	11	11	0.55902	0	0	NA	0	0	NA	0	0	NA	0	0	NA	323.31
sp|O00170|AIP_HUMAN	0	0	NA	0	0	NA	0	0	NA	0	0	NA	0	0	NA	0	0	NA	0	0	NA	0	0	NA	1	1	0.54512	0	0	NA	0	0	NA	0	0	NA	0	0	NA	0	0	NA	7.4738
sp|O00178|GTPB1_HUMAN	0	0	NA	0	0	NA	0	0	NA	0	0	NA	1	1	1.2009	1	1	1.0608	1	1	1.2704	1	1	1.4688	0	0	NA	0	0	NA	0	0	NA	0	0	NA	0	0	NA	0	0	NA	6.4633
sp|O00193|SMAP_HUMAN	0	0	NA	0	0	NA	0	0	NA	0	0	NA	0	0	NA	0	0	NA	0	0	NA	0	0	NA	0	0	NA	0	0	NA	0	0	NA	0	0	NA	0	0	NA	0	0	NA	323.31
sp|O00203|AP3B1_HUMAN	0	0	NA	0	0	NA	0	0	NA	0	0	NA	1	1	0.93319	1	1	1.1985	1	1	0.479	0	0	NA	0	0	NA	0	0	NA	0	0	NA	0	0	NA	0	0	NA	0	0	NA	2.4173
sp|O00231|PSD11_HUMAN	0	0	NA	0	0	NA	1	1	NA	0	0	NA	0	0	NA	1	1	0.73928	0	0	NA	1	1	2.0183	1	1	0.6093	0	0	NA	0	0	NA	0	0	NA	0	0	NA	0	0	NA	5.3998
sp|O00264|PGRC1_HUMAN	0	0	NA	0	0	NA	0	0	NA	1	1	0.51034	0	0	NA	0	0	NA	0	0	NA	0	0	NA	1	1	0.58741	1	1	1.0644	0	0	NA	0	0	NA	0	0	NA	0	0	NA	30.511
sp|O00267|SPT5H_HUMAN	0	0	NA	0	0	NA	0	0	NA	0	0	NA	1	1	0.51132	1	1	0.32806	1	1	0.82274	0	0	NA	0	0	NA	1	1	NA	0	0	NA	0	0	NA	0	0	NA	0	0	NA	16.677
sp|O00273|DFFA_HUMAN	0	0	NA	0	0	NA	0	0	NA	0	0	NA	0	0	NA	0	0	NA	0	0	NA	0	0	NA	0	0	NA	0	0	NA	0	0	NA	0	0	NA	0	0	NA	0	0	NA	2.5672
sp|O00299|CLIC1_HUMAN	0	0	NA	0	0	NA	0	0	NA	0	0	NA	0	0	NA	0	0	NA	0	0	NA	0	0	NA	0	0	NA	0	0	NA	0	0	NA	0	0	NA	0	0	NA	0	0	NA	140.31
sp|O00303|EIF3F_HUMAN	0	0	NA	0	0	NA	0	0	NA	1	1	0.69817	2	2	0.56554	2	2	0.67997	1	1	3.2137	1	1	0.68296	1	1	0.96681	1	1	NA	0	0	NA	0	0	NA	0	0	NA	0	0	NA	25.008
sp|O00410|IPO5_HUMAN	1	1	0.44727	0	0	NA	0	0	NA	0	0	NA	4	4	0.70015	3	3	0.73008	5	5	1.1636	1	1	1.3781	4	4	0.55498	4	4	1.2356	0	0	NA	0	0	NA	0	0	NA	0	0	NA	26.815
sp|O00411|RPOM_HUMAN	0	0	NA	0	0	NA	0	0	NA	0	0	NA	1	1	NA	0	0	NA	0	0	NA	0	0	NA	0	0	NA	0	0	NA	0	0	NA	0	0	NA	0	0	NA	0	0	NA	4.2841
sp|O00422|SAP18_HUMAN	0	0	NA	0	0	NA	0	0	NA	2	2	0.64752	0	0	NA	0	0	NA	0	0	NA	0	0	NA	0	0	NA	0	0	NA	5	5	0.23968	1	1	5.9107	4	4	0.9078	2	2	2.9394	62.17
sp|O00425|IF2B3_HUMAN	6	5	0.19123	9	7	2.5555	3	1	1.1295	4	3	0.44883	20	18	1.2677	18	16	1.2362	25	23	0.45344	22	20	0.39351	15	13	1.1956	19	17	0.48843	10	8	1.019	14	12	10.986	12	10	2.7656	10	8	5.9817	323.31
sp|O00483|NDUA4_HUMAN	0	0	NA	0	0	NA	1	1	0.92392	1	1	1.1952	1	1	0.51223	0	0	NA	1	1	0.45974	0	0	NA	1	1	0.51772	0	0	NA	0	0	NA	0	0	NA	0	0	NA	0	0	NA	4.4486
sp|O00487|PSDE_HUMAN	0	0	NA	0	0	NA	0	0	NA	0	0	NA	0	0	NA	0	0	NA	0	0	NA	0	0	NA	0	0	NA	0	0	NA	0	0	NA	0	0	NA	0	0	NA	0	0	NA	3.7071
sp|O00505|IMA4_HUMAN	0	0	NA	1	0	NA	0	0	NA	0	0	NA	3	3	2.4989	3	2	1.8363	4	4	2.4651	2	1	4.8851	3	2	2.0347	2	1	2.4078	0	0	NA	0	0	NA	0	0	NA	0	0	NA	15.038
sp|O00541|PESC_HUMAN	0	0	NA	0	0	NA	0	0	NA	0	0	NA	8	8	2.1811	4	4	2.6046	11	11	0.77189	9	9	0.70117	3	3	2.4615	8	8	0.77912	5	5	0.6241	2	2	32.703	2	2	1.7995	2	2	6.4026	107.85
sp|O00560|SDCB1_HUMAN	0	0	NA	0	0	NA	0	0	NA	0	0	NA	0	0	NA	0	0	NA	0	0	NA	0	0	NA	0	0	NA	0	0	NA	0	0	NA	0	0	NA	0	0	NA	0	0	NA	42.458
sp|O00566|MPP10_HUMAN	0	0	NA	0	0	NA	0	0	NA	0	0	NA	3	3	2.1999	1	1	2.4967	4	4	0.74238	1	1	0.36297	0	0	NA	4	4	0.72068	2	2	3.8634	1	1	NA	1	1	NA	0	0	NA	204.6
sp|O00567|NOP56_HUMAN	0	0	NA	0	0	NA	1	1	1.3092	2	2	0.7253	16	16	1.5713	13	13	1.4036	22	22	0.71055	15	15	0.63125	12	12	1.3662	14	14	0.69108	15	15	0.6614	7	7	7.3894	10	10	2.21	10	10	6.1882	323.31
sp|O00571|DDX3X_HUMAN	0	0	NA	2	2	1.7018	4	4	0.70799	6	6	0.74677	16	16	1.1943	17	17	1.0722	16	16	1.5589	11	11	1.3893	12	12	1.1069	7	7	1.527	17	17	0.22423	10	10	16.379	17	17	1.0898	12	12	4.3627	323.31
sp|O00629|IMA3_HUMAN	1	1	NA	3	3	4.9689	0	0	NA	0	0	NA	1	1	2.6925	4	4	2.7344	4	4	3.6488	2	2	5.9379	3	3	2.3382	4	4	3.7457	0	0	NA	0	0	NA	0	0	NA	0	0	NA	90.263
sp|O00743|PPP6_HUMAN	0	0	NA	1	1	1.9652	3	3	0.54032	3	3	0.72648	1	1	0.60803	3	3	0.59249	1	1	0.54179	2	2	0.61238	1	1	0.42509	1	1	0.55046	0	0	NA	0	0	NA	0	0	NA	0	0	NA	73.564
sp|O00764|PDXK_HUMAN	0	0	NA	0	0	NA	0	0	NA	0	0	NA	0	0	NA	0	0	NA	0	0	NA	0	0	NA	0	0	NA	0	0	NA	0	0	NA	0	0	NA	0	0	NA	0	0	NA	41.681
sp|O14545|TRAD1_HUMAN	0	0	NA	0	0	NA	0	0	NA	0	0	NA	1	1	0.85522	1	1	0.87242	1	1	1.3177	1	1	1.0643	1	1	0.528	0	0	NA	0	0	NA	0	0	NA	0	0	NA	0	0	NA	10.105
sp|O14556|G3PT_HUMAN	0	0	NA	0	0	NA	1	0	NA	0	0	NA	0	0	NA	0	0	NA	0	0	NA	0	0	NA	0	0	NA	0	0	NA	0	0	NA	0	0	NA	0	0	NA	0	0	NA	-2
sp|O14579|COPE_HUMAN	0	0	NA	0	0	NA	0	0	NA	0	0	NA	0	0	NA	0	0	NA	0	0	NA	0	0	NA	0	0	NA	0	0	NA	0	0	NA	0	0	NA	0	0	NA	0	0	NA	136.26
sp|O14617|AP3D1_HUMAN	0	0	NA	0	0	NA	0	0	NA	0	0	NA	0	0	NA	1	1	0.54812	0	0	NA	0	0	NA	2	2	0.59657	0	0	NA	0	0	NA	0	0	NA	0	0	NA	0	0	NA	5.6574
sp|O14618|CCS_HUMAN	0	0	NA	0	0	NA	0	0	NA	0	0	NA	0	0	NA	0	0	NA	0	0	NA	0	0	NA	0	0	NA	0	0	NA	0	0	NA	0	0	NA	0	0	NA	0	0	NA	2.2578
sp|O14639|ABLM1_HUMAN	0	0	NA	0	0	NA	0	0	NA	0	0	NA	0	0	NA	0	0	NA	0	0	NA	0	0	NA	0	0	NA	0	0	NA	0	0	NA	0	0	NA	0	0	NA	0	0	NA	7.5609
sp|O14646|CHD1_HUMAN	0	0	NA	0	0	NA	0	0	NA	0	0	NA	0	0	NA	0	0	NA	0	0	NA	2	2	NA	1	1	0.62076	0	0	NA	13	13	0.13327	8	8	6.1993	7	7	0.37767	6	6	1.0855	51.575
sp|O14647|CHD2_HUMAN	0	0	NA	0	0	NA	0	0	NA	0	0	NA	0	0	NA	0	0	NA	0	0	NA	0	0	NA	1	0	NA	0	0	NA	4	1	NA	3	2	NA	1	0	NA	1	0	NA	2.542
sp|O14654|IRS4_HUMAN	4	4	0.30815	4	4	2.1777	2	2	0.44509	3	3	0.65565	34	34	0.4379	35	35	0.39921	31	31	0.49439	33	33	0.41022	24	24	0.39696	21	21	0.47972	1	1	1.1838	4	4	2.731	1	1	2.4986	2	2	5.4207	323.31
sp|O14735|CDIPT_HUMAN	0	0	NA	0	0	NA	0	0	NA	0	0	NA	0	0	NA	0	0	NA	0	0	NA	0	0	NA	0	0	NA	0	0	NA	0	0	NA	0	0	NA	0	0	NA	0	0	NA	1.996
sp|O14744|ANM5_HUMAN	2	2	0.1876	3	3	5.2208	10	10	0.45897	7	7	0.68364	10	10	0.70307	11	11	0.62091	5	5	1.1797	3	3	1.1836	5	5	0.55043	3	3	1.1277	13	13	0.34621	10	10	9.9394	8	8	1.2236	7	7	3.4844	323.31
sp|O14776|TCRG1_HUMAN	0	0	NA	0	0	NA	0	0	NA	0	0	NA	0	0	NA	0	0	NA	0	0	NA	0	0	NA	0	0	NA	0	0	NA	0	0	NA	0	0	NA	0	0	NA	0	0	NA	21.498
sp|O14802|RPC1_HUMAN	0	0	NA	0	0	NA	0	0	NA	0	0	NA	0	0	NA	0	0	NA	0	0	NA	0	0	NA	0	0	NA	1	1	2.3389	0	0	NA	0	0	NA	0	0	NA	0	0	NA	10.019
sp|O14818|PSA7_HUMAN;sp|Q8TAA3|PSA7L_HUMAN	0	0	NA	0	0	NA	0	0	NA	0	0	NA	2	2	1.0622	1	1	0.97305	1	1	NA	0	0	NA	1	1	0.5275	0	0	NA	0	0	NA	0	0	NA	0	0	NA	0	0	NA	20.825
sp|O14828|SCAM3_HUMAN	0	0	NA	0	0	NA	0	0	NA	0	0	NA	0	0	NA	0	0	NA	0	0	NA	0	0	NA	0	0	NA	0	0	NA	0	0	NA	0	0	NA	0	0	NA	0	0	NA	21.04
sp|O14893|GEMI2_HUMAN	0	0	NA	0	0	NA	0	0	NA	0	0	NA	0	0	NA	0	0	NA	0	0	NA	0	0	NA	0	0	NA	0	0	NA	0	0	NA	0	0	NA	0	0	NA	0	0	NA	4.3081
sp|O14908|GIPC1_HUMAN	0	0	NA	0	0	NA	0	0	NA	0	0	NA	0	0	NA	0	0	NA	0	0	NA	0	0	NA	0	0	NA	0	0	NA	0	0	NA	0	0	NA	0	0	NA	0	0	NA	9.2593
sp|O14929|HAT1_HUMAN	0	0	NA	0	0	NA	0	0	NA	0	0	NA	1	1	0.80075	2	2	0.69262	0	0	NA	1	1	NA	0	0	NA	0	0	NA	0	0	NA	0	0	NA	0	0	NA	0	0	NA	11.149
sp|P19105|ML12A_HUMAN;sp|O14950|ML12B_HUMAN;sp|P24844|MYL9_HUMAN	0	0	NA	0	0	NA	0	0	NA	0	0	NA	0	0	NA	0	0	NA	0	0	NA	0	0	NA	0	0	NA	0	0	NA	0	0	NA	0	0	NA	0	0	NA	0	0	NA	73.249
sp|O14964|HGS_HUMAN	0	0	NA	0	0	NA	0	0	NA	0	0	NA	0	0	NA	0	0	NA	0	0	NA	0	0	NA	0	0	NA	0	0	NA	0	0	NA	0	0	NA	0	0	NA	0	0	NA	2.1079
sp|O14974|MYPT1_HUMAN	0	0	NA	0	0	NA	0	0	NA	0	0	NA	0	0	NA	0	0	NA	0	0	NA	0	0	NA	0	0	NA	0	0	NA	0	0	NA	0	0	NA	0	0	NA	0	0	NA	25.796
sp|O14979|HNRDL_HUMAN	1	0	NA	1	0	NA	1	0	NA	0	0	NA	1	0	NA	1	0	NA	1	0	NA	1	0	NA	1	0	NA	1	0	NA	5	4	0.13637	3	2	0.96335	4	3	0.21848	2	1	0.94301	92.355
sp|O14980|XPO1_HUMAN	0	0	NA	0	0	NA	1	1	0.52529	2	2	0.86843	6	6	0.65014	4	4	0.71285	3	3	0.78559	6	6	0.74534	7	7	0.46212	6	6	0.75999	0	0	NA	0	0	NA	0	0	NA	0	0	NA	61.996
sp|O15020|SPTN2_HUMAN	0	0	NA	0	0	NA	0	0	NA	0	0	NA	0	0	NA	0	0	NA	0	0	NA	0	0	NA	0	0	NA	0	0	NA	0	0	NA	0	0	NA	0	0	NA	0	0	NA	21.392
sp|O15027|SC16A_HUMAN	0	0	NA	0	0	NA	0	0	NA	0	0	NA	5	5	0.70264	5	5	0.49959	2	2	0.60144	6	6	0.47202	0	0	NA	1	1	NA	0	0	NA	0	0	NA	0	0	NA	0	0	NA	20.778
sp|O15042|SR140_HUMAN	0	0	NA	0	0	NA	1	1	0.57205	1	1	0.42082	0	0	NA	0	0	NA	0	0	NA	0	0	NA	0	0	NA	0	0	NA	3	3	0.42035	3	3	1.4005	3	3	1.022	2	2	2.8272	323.31
sp|O15067|PUR4_HUMAN	0	0	NA	0	0	NA	0	0	NA	0	0	NA	2	2	0.77219	1	1	0.39331	0	0	NA	0	0	NA	1	1	0.26701	1	1	2.3481	0	0	NA	0	0	NA	0	0	NA	0	0	NA	7.6785
sp|O15084|ANR28_HUMAN	0	0	NA	0	0	NA	0	0	NA	0	0	NA	0	0	NA	1	1	0.64382	0	0	NA	1	1	0.50213	1	1	NA	2	2	1.072	0	0	NA	0	0	NA	0	0	NA	0	0	NA	4.5191
sp|O15105|SMAD7_HUMAN	0	0	NA	0	0	NA	0	0	NA	0	0	NA	0	0	NA	0	0	NA	0	0	NA	0	0	NA	0	0	NA	0	0	NA	0	0	NA	0	0	NA	0	0	NA	0	0	NA	3.0658
sp|O15121|DEGS1_HUMAN	0	0	NA	0	0	NA	0	0	NA	0	0	NA	0	0	NA	0	0	NA	0	0	NA	0	0	NA	0	0	NA	0	0	NA	0	0	NA	0	0	NA	0	0	NA	0	0	NA	-2
sp|O15126|SCAM1_HUMAN	0	0	NA	0	0	NA	0	0	NA	0	0	NA	0	0	NA	0	0	NA	0	0	NA	0	0	NA	0	0	NA	0	0	NA	0	0	NA	0	0	NA	0	0	NA	0	0	NA	5.9442
sp|O15127|SCAM2_HUMAN	0	0	NA	0	0	NA	0	0	NA	0	0	NA	0	0	NA	0	0	NA	0	0	NA	0	0	NA	0	0	NA	0	0	NA	0	0	NA	0	0	NA	0	0	NA	0	0	NA	96.623
sp|O15144|ARPC2_HUMAN	0	0	NA	0	0	NA	0	0	NA	0	0	NA	0	0	NA	0	0	NA	0	0	NA	0	0	NA	0	0	NA	0	0	NA	0	0	NA	0	0	NA	0	0	NA	0	0	NA	31.193
sp|O15213|WDR46_HUMAN	0	0	NA	0	0	NA	0	0	NA	0	0	NA	4	4	2.0352	2	2	1.0908	5	5	0.90393	5	5	0.58112	0	0	NA	2	2	1.1076	0	0	NA	1	1	3.1198	1	1	2.2209	1	1	NA	100.55
sp|O15226|NKRF_HUMAN	0	0	NA	0	0	NA	0	0	NA	0	0	NA	3	3	1.142	4	4	1.5758	4	4	0.70242	1	1	0.48753	2	2	1.27	3	3	0.81592	3	3	0.24358	2	2	2.1316	1	1	0.66756	1	1	3.6793	74.375
sp|O15234|CASC3_HUMAN	0	0	NA	0	0	NA	0	0	NA	1	1	0.12379	4	4	1.1528	6	6	1.023	8	8	0.4211	8	8	0.39464	3	3	1.0509	2	2	0.2106	3	3	1.2156	1	1	NA	2	2	3.9993	1	1	NA	87.907
sp|O15260|SURF4_HUMAN	0	0	NA	0	0	NA	0	0	NA	0	0	NA	1	1	0.51486	1	1	0.85555	0	0	NA	0	0	NA	0	0	NA	0	0	NA	0	0	NA	0	0	NA	0	0	NA	0	0	NA	5.3015
sp|O15269|SPTC1_HUMAN	0	0	NA	0	0	NA	0	0	NA	0	0	NA	3	3	0.58448	3	3	0.54842	3	3	0.36805	1	1	0.68301	1	1	0.30942	0	0	NA	0	0	NA	0	0	NA	0	0	NA	0	0	NA	56.024
sp|O15344|TRI18_HUMAN	0	0	NA	0	0	NA	0	0	NA	0	0	NA	0	0	NA	0	0	NA	0	0	NA	0	0	NA	0	0	NA	0	0	NA	0	0	NA	0	0	NA	0	0	NA	0	0	NA	20.065
sp|O15347|HMGB3_HUMAN	0	0	NA	0	0	NA	0	0	NA	0	0	NA	0	0	NA	0	0	NA	0	0	NA	0	0	NA	0	0	NA	0	0	NA	0	0	NA	0	0	NA	0	0	NA	0	0	NA	2.0767
sp|O15355|PPM1G_HUMAN	0	0	NA	0	0	NA	1	1	0.36639	0	0	NA	4	4	0.66844	4	4	0.66821	3	3	1.273	2	2	0.91917	3	3	0.56577	0	0	NA	0	0	NA	0	0	NA	0	0	NA	0	0	NA	69.681
sp|O15371|EIF3D_HUMAN	0	0	NA	0	0	NA	1	1	0.77905	1	1	0.698	9	9	0.57964	6	6	0.55631	3	3	0.98984	4	4	0.67668	4	4	0.50363	2	2	0.87891	0	0	NA	0	0	NA	0	0	NA	0	0	NA	61.744
sp|O15372|EIF3H_HUMAN	0	0	NA	0	0	NA	0	0	NA	0	0	NA	0	0	NA	0	0	NA	0	0	NA	0	0	NA	0	0	NA	0	0	NA	0	0	NA	0	0	NA	0	0	NA	0	0	NA	5.0797
sp|O15381|NVL_HUMAN	0	0	NA	0	0	NA	0	0	NA	0	0	NA	1	1	1.1173	1	1	1.2054	1	1	0.84988	1	1	0.95311	0	0	NA	0	0	NA	0	0	NA	0	0	NA	0	0	NA	1	1	0.39958	119.98
sp|O15397|IPO8_HUMAN	0	0	NA	1	0	NA	0	0	NA	0	0	NA	2	2	0.42253	2	2	0.59167	3	3	0.76334	2	2	0.65419	2	1	NA	1	0	NA	0	0	NA	0	0	NA	0	0	NA	0	0	NA	10.943
sp|O15400|STX7_HUMAN	0	0	NA	0	0	NA	0	0	NA	0	0	NA	0	0	NA	0	0	NA	0	0	NA	0	0	NA	0	0	NA	0	0	NA	0	0	NA	0	0	NA	0	0	NA	0	0	NA	8.6968
sp|O15479|MAGB2_HUMAN	0	0	NA	0	0	NA	0	0	NA	0	0	NA	0	0	NA	0	0	NA	0	0	NA	0	0	NA	0	0	NA	0	0	NA	0	0	NA	0	0	NA	0	0	NA	0	0	NA	3.2061
sp|O15523|DDX3Y_HUMAN;sp|Q9NQI0|DDX4_HUMAN	0	0	NA	1	0	NA	3	0	NA	4	0	NA	12	0	NA	13	0	NA	11	0	NA	7	0	NA	8	0	NA	5	0	NA	14	0	NA	8	0	NA	13	0	NA	9	0	NA	-2
sp|O43143|DHX15_HUMAN	0	0	NA	1	1	1.955	0	0	NA	3	3	0.61149	7	7	0.76227	6	6	0.7878	10	10	0.71114	5	5	0.80035	5	5	0.71264	6	6	0.74119	11	11	0.4323	8	8	6.5487	10	10	1.565	8	8	3.9633	301.32
sp|O43164|PJA2_HUMAN	0	0	NA	0	0	NA	0	0	NA	0	0	NA	4	4	0.79438	3	3	0.89049	2	2	0.79278	3	3	0.73937	2	2	NA	3	3	0.9348	0	0	NA	0	0	NA	0	0	NA	0	0	NA	58.701
sp|O43166|SI1L1_HUMAN	0	0	NA	0	0	NA	0	0	NA	0	0	NA	0	0	NA	0	0	NA	0	0	NA	0	0	NA	0	0	NA	0	0	NA	0	0	NA	0	0	NA	0	0	NA	0	0	NA	4.4407
sp|O43172|PRP4_HUMAN	0	0	NA	0	0	NA	0	0	NA	0	0	NA	0	0	NA	0	0	NA	0	0	NA	0	0	NA	0	0	NA	0	0	NA	1	1	1.1417	3	3	1.4698	2	2	1.4915	2	2	10.486	22.155
sp|O43175|SERA_HUMAN	0	0	NA	2	2	2.9489	2	2	0.77562	2	2	0.73194	14	14	0.8671	13	13	0.792	12	12	1.9683	11	11	1.8244	8	8	0.75604	7	7	2.1256	1	1	0.50705	2	2	28.959	0	0	NA	0	0	NA	216.82
sp|O43242|PSMD3_HUMAN	0	0	NA	1	1	3.6692	0	0	NA	2	2	0.85089	10	10	0.8194	11	11	0.72482	8	8	1.2249	6	6	1.2352	7	7	0.71199	5	5	1.4334	0	0	NA	0	0	NA	0	0	NA	0	0	NA	72.984
sp|O43251|RFOX2_HUMAN;sp|Q9NWB1|RFOX1_HUMAN;sp|A6NFN3|RFOX3_HUMAN	0	0	NA	0	0	NA	0	0	NA	0	0	NA	2	2	0.84877	1	1	0.94624	1	1	0.75369	2	2	0.52826	1	1	0.83554	1	1	0.69586	0	0	NA	1	1	NA	0	0	NA	0	0	NA	4.4012
sp|O43264|ZW10_HUMAN	0	0	NA	0	0	NA	0	0	NA	0	0	NA	0	0	NA	0	0	NA	0	0	NA	2	2	1.0177	1	1	0.90736	1	1	0.94297	0	0	NA	0	0	NA	0	0	NA	0	0	NA	3.3842
sp|O43290|SNUT1_HUMAN	0	0	NA	0	0	NA	0	0	NA	0	0	NA	0	0	NA	0	0	NA	0	0	NA	0	0	NA	0	0	NA	0	0	NA	1	1	NA	1	1	NA	1	1	2.3222	3	3	NA	60.179
tr|C9J1V9|C9J1V9_HUMAN;sp|O43324|MCA3_HUMAN	0	0	NA	0	0	NA	0	0	NA	0	0	NA	0	0	NA	0	0	NA	0	0	NA	0	0	NA	1	1	0.737	0	0	NA	0	0	NA	0	0	NA	0	0	NA	0	0	NA	4.0931
sp|O43347|MSI1H_HUMAN	0	0	NA	0	0	NA	1	1	2.9181	0	0	NA	1	1	0.71912	1	1	0.8035	1	1	0.95807	1	1	0.67819	2	2	0.87916	2	2	0.73142	0	0	NA	0	0	NA	0	0	NA	0	0	NA	8.9054
sp|O43390|HNRPR_HUMAN	3	3	2.1609	0	0	NA	0	0	NA	1	1	0.59583	3	3	1.5038	3	3	1.7251	3	3	1.3514	2	2	1.5756	4	4	1.0339	1	1	1.2986	5	5	0.23057	5	5	7.3838	4	4	0.64643	3	3	2.0659	172.11
sp|O43395|PRPF3_HUMAN	0	0	NA	0	0	NA	0	0	NA	0	0	NA	0	0	NA	0	0	NA	0	0	NA	0	0	NA	0	0	NA	0	0	NA	0	0	NA	0	0	NA	1	1	NA	0	0	NA	19.711
sp|O43396|TXNL1_HUMAN	0	0	NA	0	0	NA	0	0	NA	0	0	NA	0	0	NA	0	0	NA	0	0	NA	0	0	NA	0	0	NA	0	0	NA	0	0	NA	0	0	NA	0	0	NA	0	0	NA	25.238
sp|O43432|IF4G3_HUMAN	0	0	NA	0	0	NA	0	0	NA	0	0	NA	0	0	NA	0	0	NA	0	0	NA	0	0	NA	0	0	NA	0	0	NA	0	0	NA	0	0	NA	0	0	NA	0	0	NA	1.9458
sp|O43488|ARK72_HUMAN;sp|Q8NHP1|ARK74_HUMAN	0	0	NA	0	0	NA	0	0	NA	0	0	NA	0	0	NA	0	0	NA	0	0	NA	0	0	NA	0	0	NA	0	0	NA	0	0	NA	0	0	NA	0	0	NA	0	0	NA	17.567
sp|O43491|E41L2_HUMAN	0	0	NA	0	0	NA	0	0	NA	0	0	NA	5	5	0.66601	6	6	0.48149	2	2	1.2501	2	2	1.2133	3	3	0.48305	1	1	0.94589	0	0	NA	0	0	NA	0	0	NA	0	0	NA	36.781
sp|O43506|ADA20_HUMAN	0	0	NA	0	0	NA	0	0	NA	0	0	NA	0	0	NA	0	0	NA	1	1	1.6778	0	0	NA	0	0	NA	0	0	NA	0	0	NA	0	0	NA	0	0	NA	0	0	NA	-2
sp|O43583|DENR_HUMAN	0	0	NA	0	0	NA	0	0	NA	0	0	NA	0	0	NA	0	0	NA	0	0	NA	0	0	NA	0	0	NA	0	0	NA	0	0	NA	0	0	NA	0	0	NA	0	0	NA	87.089
sp|O43592|XPOT_HUMAN	0	0	NA	1	1	2.1969	1	1	0.52165	1	1	0.63078	7	7	0.69168	9	9	0.85318	8	8	0.79308	7	7	0.64375	2	2	0.66663	6	6	0.66711	0	0	NA	0	0	NA	0	0	NA	0	0	NA	61.806
sp|O43615|TIM44_HUMAN	0	0	NA	0	0	NA	0	0	NA	0	0	NA	0	0	NA	2	2	0.53114	1	1	0.51076	0	0	NA	0	0	NA	0	0	NA	0	0	NA	0	0	NA	0	0	NA	0	0	NA	7.8746
sp|O43633|CHM2A_HUMAN	0	0	NA	0	0	NA	0	0	NA	0	0	NA	0	0	NA	0	0	NA	0	0	NA	0	0	NA	0	0	NA	0	0	NA	0	0	NA	0	0	NA	0	0	NA	0	0	NA	3.4984
sp|O43660|PLRG1_HUMAN	0	0	NA	0	0	NA	0	0	NA	0	0	NA	1	1	0.88563	2	2	0.80165	1	1	0.93813	0	0	NA	0	0	NA	0	0	NA	11	11	0.97641	14	14	7.8629	15	15	2.838	12	12	6.5185	144.09
sp|O43670|ZN207_HUMAN	0	0	NA	0	0	NA	0	0	NA	0	0	NA	0	0	NA	0	0	NA	0	0	NA	0	0	NA	0	0	NA	0	0	NA	0	0	NA	0	0	NA	0	0	NA	0	0	NA	46.841
sp|O43684|BUB3_HUMAN	0	0	NA	0	0	NA	0	0	NA	0	0	NA	2	2	0.75822	1	1	0.64276	0	0	NA	1	1	2.3538	1	1	0.51537	1	1	NA	0	0	NA	0	0	NA	0	0	NA	0	0	NA	31.919
sp|O43707|ACTN4_HUMAN	0	0	NA	0	0	NA	0	0	NA	0	0	NA	8	8	0.65296	10	10	0.61452	3	3	1.4373	2	2	1.3636	8	8	0.57997	4	4	1.6038	1	1	0.17382	0	0	NA	0	0	NA	0	0	NA	323.31
sp|O43709|WBS22_HUMAN	0	0	NA	0	0	NA	0	0	NA	0	0	NA	0	0	NA	0	0	NA	0	0	NA	0	0	NA	0	0	NA	0	0	NA	0	0	NA	0	0	NA	0	0	NA	0	0	NA	-2
sp|O43719|HTSF1_HUMAN	0	0	NA	0	0	NA	0	0	NA	0	0	NA	0	0	NA	0	0	NA	0	0	NA	0	0	NA	0	0	NA	0	0	NA	0	0	NA	0	0	NA	0	0	NA	0	0	NA	69.389
sp|Q9Y478|AAKB1_HUMAN;sp|O43741|AAKB2_HUMAN	0	0	NA	0	0	NA	0	0	NA	0	0	NA	0	0	NA	0	0	NA	0	0	NA	0	0	NA	0	0	NA	0	0	NA	0	0	NA	0	0	NA	0	0	NA	0	0	NA	2.0752
sp|O43765|SGTA_HUMAN	0	0	NA	0	0	NA	0	0	NA	0	0	NA	0	0	NA	0	0	NA	0	0	NA	0	0	NA	0	0	NA	0	0	NA	0	0	NA	0	0	NA	0	0	NA	0	0	NA	21.922
sp|O43776|SYNC_HUMAN	0	0	NA	0	0	NA	0	0	NA	0	0	NA	3	3	1.0595	3	3	0.72496	0	0	NA	1	1	NA	3	3	0.66876	1	1	0.35156	0	0	NA	0	0	NA	0	0	NA	0	0	NA	16.897
sp|O43795|MYO1B_HUMAN	0	0	NA	0	0	NA	0	0	NA	0	0	NA	4	4	0.43013	3	3	0.45745	0	0	NA	1	1	1.105	1	1	0.31835	0	0	NA	0	0	NA	0	0	NA	0	0	NA	0	0	NA	35.231
sp|O43809|CPSF5_HUMAN	0	0	NA	0	0	NA	0	0	NA	0	0	NA	0	0	NA	0	0	NA	0	0	NA	0	0	NA	0	0	NA	0	0	NA	0	0	NA	0	0	NA	0	0	NA	0	0	NA	85.272
sp|O43818|U3IP2_HUMAN	0	0	NA	0	0	NA	0	0	NA	0	0	NA	1	1	2.6933	0	0	NA	4	4	0.51624	3	3	0.40954	4	4	1.9338	3	3	0.73269	5	5	0.76632	4	4	3.2967	2	2	4.196	2	2	2.8691	155.97
sp|O43819|SCO2_HUMAN	0	0	NA	0	0	NA	0	0	NA	0	0	NA	1	1	0.42058	2	2	0.69167	1	1	0.66669	2	2	0.64223	0	0	NA	0	0	NA	0	0	NA	0	0	NA	0	0	NA	0	0	NA	16.644
sp|O43823|AKAP8_HUMAN	0	0	NA	0	0	NA	0	0	NA	0	0	NA	1	1	0.7144	1	1	0.57066	0	0	NA	3	3	0.85885	0	0	NA	0	0	NA	0	0	NA	0	0	NA	1	1	NA	0	0	NA	5.9558
sp|O43852|CALU_HUMAN	4	4	0.26969	2	2	2.8241	8	8	0.43239	14	14	0.67444	12	12	0.33293	10	10	0.31039	14	14	0.27762	11	11	0.22129	9	9	0.31049	11	11	0.2953	0	0	NA	0	0	NA	0	0	NA	0	0	NA	323.31
sp|O43933|PEX1_HUMAN	0	0	NA	0	0	NA	0	0	NA	0	0	NA	1	1	NA	1	1	NA	0	0	NA	0	0	NA	0	0	NA	0	0	NA	0	0	NA	0	0	NA	0	0	NA	0	0	NA	55.778
sp|O60216|RAD21_HUMAN;sp|Q9H4I0|RD21L_HUMAN	0	0	NA	0	0	NA	0	0	NA	0	0	NA	6	6	0.57438	4	4	0.6867	3	3	0.79763	8	8	0.5148	3	3	0.88658	3	3	0.49317	0	0	NA	0	0	NA	0	0	NA	0	0	NA	31.115
sp|O60231|DHX16_HUMAN	0	0	NA	0	0	NA	0	0	NA	0	0	NA	0	0	NA	0	0	NA	0	0	NA	0	0	NA	0	0	NA	0	0	NA	0	0	NA	1	1	3.1167	0	0	NA	1	1	4.7378	2.0303
sp|O60256|KPRB_HUMAN	0	0	NA	0	0	NA	0	0	NA	0	0	NA	0	0	NA	0	0	NA	0	0	NA	0	0	NA	0	0	NA	0	0	NA	0	0	NA	0	0	NA	0	0	NA	0	0	NA	11.264
sp|O60264|SMCA5_HUMAN;sp|P28370|SMCA1_HUMAN	0	0	NA	0	0	NA	0	0	NA	0	0	NA	0	0	NA	0	0	NA	1	1	NA	0	0	NA	0	0	NA	1	1	1.0505	0	0	NA	0	0	NA	0	0	NA	0	0	NA	4.963
sp|O60287|NPA1P_HUMAN	0	0	NA	0	0	NA	0	0	NA	0	0	NA	0	0	NA	0	0	NA	0	0	NA	0	0	NA	0	0	NA	0	0	NA	0	0	NA	0	0	NA	0	0	NA	0	0	NA	2.3179
sp|O60292|SI1L3_HUMAN	0	0	NA	0	0	NA	0	0	NA	0	0	NA	0	0	NA	0	0	NA	0	0	NA	0	0	NA	0	0	NA	0	0	NA	0	0	NA	0	0	NA	0	0	NA	0	0	NA	7.5861
sp|O60306|AQR_HUMAN	0	0	NA	0	0	NA	0	0	NA	0	0	NA	0	0	NA	0	0	NA	0	0	NA	0	0	NA	0	0	NA	0	0	NA	21	21	0.98526	21	21	7.3328	17	17	3.9226	22	22	9.1843	323.31
sp|O60318|GANP_HUMAN	0	0	NA	0	0	NA	0	0	NA	0	0	NA	2	2	0.55195	2	2	0.5238	3	3	0.61519	3	3	0.45749	1	1	0.5217	0	0	NA	0	0	NA	0	0	NA	0	0	NA	0	0	NA	27.815
sp|O60333|KIF1B_HUMAN;sp|Q12756|KIF1A_HUMAN	0	0	NA	0	0	NA	0	0	NA	0	0	NA	0	0	NA	0	0	NA	0	0	NA	0	0	NA	0	0	NA	0	0	NA	0	0	NA	0	0	NA	0	0	NA	0	0	NA	1.9715
sp|O60506|HNRPQ_HUMAN;tr|H0YAA0|H0YAA0_HUMAN	2	0	NA	0	0	NA	0	0	NA	1	0	NA	4	2	1.1555	3	1	1.3357	3	1	1.387	2	1	1.3756	2	0	NA	2	2	1.1341	3	0	NA	3	0	NA	2	0	NA	3	0	NA	52.473
sp|O60508|PRP17_HUMAN	0	0	NA	0	0	NA	0	0	NA	0	0	NA	0	0	NA	0	0	NA	1	1	NA	0	0	NA	0	0	NA	0	0	NA	13	13	0.99758	12	12	11.562	10	10	3.1373	11	11	7.3324	295.12
sp|O60568|PLOD3_HUMAN	0	0	NA	0	0	NA	0	0	NA	0	0	NA	0	0	NA	0	0	NA	0	0	NA	0	0	NA	0	0	NA	0	0	NA	0	0	NA	0	0	NA	0	0	NA	0	0	NA	2.2948
sp|O60684|IMA7_HUMAN	1	0	NA	0	0	NA	0	0	NA	0	0	NA	3	1	1.2984	4	2	0.80025	2	2	0.72753	2	1	NA	1	0	NA	1	0	NA	0	0	NA	1	0	NA	1	0	NA	0	0	NA	7.0636
sp|O60701|UGDH_HUMAN	0	0	NA	0	0	NA	0	0	NA	0	0	NA	0	0	NA	0	0	NA	0	0	NA	0	0	NA	0	0	NA	0	0	NA	0	0	NA	0	0	NA	0	0	NA	0	0	NA	2.2769
sp|O60716|CTND1_HUMAN	0	0	NA	0	0	NA	0	0	NA	0	0	NA	1	1	0.54606	1	1	0.98881	0	0	NA	0	0	NA	1	1	NA	0	0	NA	0	0	NA	0	0	NA	0	0	NA	0	0	NA	10.486
sp|O60762|DPM1_HUMAN	0	0	NA	0	0	NA	0	0	NA	0	0	NA	1	1	0.55652	2	2	0.65743	1	1	1.4866	1	1	0.59478	0	0	NA	0	0	NA	0	0	NA	0	0	NA	0	0	NA	0	0	NA	5.1994
sp|O60763|USO1_HUMAN	0	0	NA	0	0	NA	0	0	NA	0	0	NA	2	2	0.82797	1	1	0.51483	1	1	NA	0	0	NA	0	0	NA	0	0	NA	0	0	NA	0	0	NA	0	0	NA	0	0	NA	65.036
sp|O60783|RT14_HUMAN	0	0	NA	0	0	NA	0	0	NA	0	0	NA	0	0	NA	1	1	0.71772	0	0	NA	0	0	NA	0	0	NA	0	0	NA	0	0	NA	0	0	NA	0	0	NA	0	0	NA	8.5129
sp|O60784|TOM1_HUMAN	0	0	NA	0	0	NA	0	0	NA	0	0	NA	1	1	0.99132	0	0	NA	0	0	NA	0	0	NA	0	0	NA	0	0	NA	0	0	NA	0	0	NA	0	0	NA	0	0	NA	4.5765
sp|O60812|HNRC1_HUMAN;sp|P0DMR1|HNRC4_HUMAN;sp|B7ZW38|HNRC3_HUMAN	9	1	0.12686	6	1	2.613	10	1	0.46437	11	0	NA	12	0	NA	9	0	NA	10	0	NA	10	0	NA	6	0	NA	6	0	NA	6	0	NA	4	0	NA	7	0	NA	4	0	NA	15.464
sp|Q99879|H2B1M_HUMAN;sp|Q99877|H2B1N_HUMAN;sp|Q93079|H2B1H_HUMAN;sp|Q5QNW6|H2B2F_HUMAN;sp|P62807|H2B1C_HUMAN;sp|P58876|H2B1D_HUMAN;sp|P57053|H2BFS_HUMAN;sp|O60814|H2B1K_HUMAN;sp|Q99880|H2B1L_HUMAN;sp|Q96A08|H2B1A_HUMAN	5	5	0.51942	4	4	4.4586	3	3	0.92695	6	6	0.75294	5	5	2.471	5	5	2.6351	4	4	1.3535	4	4	1.3539	5	5	2.246	5	5	1.3665	5	5	0.61256	6	6	9.3497	5	5	2.1144	5	5	5.0849	323.31
sp|O60828|PQBP1_HUMAN	0	0	NA	0	0	NA	0	0	NA	0	0	NA	0	0	NA	1	1	0.90535	1	1	0.92721	0	0	NA	1	1	0.92806	1	1	0.7994	0	0	NA	0	0	NA	0	0	NA	0	0	NA	29.58
sp|O60832|DKC1_HUMAN	0	0	NA	0	0	NA	0	0	NA	0	0	NA	2	2	1.7115	1	1	1.6725	10	10	0.51219	2	2	0.66798	3	3	1.3362	4	4	0.63166	7	7	0.65503	4	4	6.1397	4	4	3.185	6	6	3.8992	269.35
sp|O60841|IF2P_HUMAN	0	0	NA	0	0	NA	0	0	NA	0	0	NA	0	0	NA	0	0	NA	0	0	NA	0	0	NA	1	1	0.5453	1	1	NA	0	0	NA	0	0	NA	0	0	NA	0	0	NA	3.9633
sp|O60884|DNJA2_HUMAN	4	4	0.12838	2	2	3.0732	8	8	0.4277	7	7	0.65331	7	7	0.51691	6	6	0.43996	7	7	0.49228	7	7	0.43304	4	4	0.43129	4	4	0.52587	0	0	NA	0	0	NA	0	0	NA	0	0	NA	191.48
sp|O75083|WDR1_HUMAN	0	0	NA	0	0	NA	0	0	NA	0	0	NA	5	5	0.63386	4	4	0.5002	1	1	NA	0	0	NA	1	1	0.51656	0	0	NA	0	0	NA	0	0	NA	0	0	NA	0	0	NA	14.789
sp|O75131|CPNE3_HUMAN	0	0	NA	0	0	NA	0	0	NA	0	0	NA	1	1	0.66359	1	1	0.94864	0	0	NA	0	0	NA	0	0	NA	0	0	NA	0	0	NA	0	0	NA	0	0	NA	0	0	NA	7.1447
sp|O75152|ZC11A_HUMAN	0	0	NA	0	0	NA	0	0	NA	0	0	NA	2	2	1.9906	1	1	1.418	11	11	0.25191	4	4	0.41559	3	3	1.3926	6	6	0.47505	20	20	0.1476	12	12	7.7723	19	19	0.77468	14	14	3.0761	323.31
sp|O75155|CAND2_HUMAN	0	0	NA	0	0	NA	0	0	NA	0	0	NA	0	0	NA	0	0	NA	0	0	NA	2	2	0.54596	2	2	0.55207	1	1	0.49242	0	0	NA	0	0	NA	0	0	NA	0	0	NA	2.1438
sp|O75165|DJC13_HUMAN	0	0	NA	0	0	NA	0	0	NA	0	0	NA	0	0	NA	1	1	NA	0	0	NA	0	0	NA	0	0	NA	0	0	NA	0	0	NA	0	0	NA	0	0	NA	0	0	NA	7.6682
sp|O75190|DNJB6_HUMAN;sp|Q8WWF6|DNJB3_HUMAN;sp|Q8NHS0|DNJB8_HUMAN;sp|Q7Z6W7|DNJB7_HUMAN;sp|P25686|DNJB2_HUMAN	0	0	NA	0	0	NA	0	0	NA	0	0	NA	2	2	0.41394	3	3	0.37997	1	1	0.81571	1	1	0.35084	1	1	0.32481	0	0	NA	0	0	NA	0	0	NA	0	0	NA	0	0	NA	17.56
sp|O75223|GGCT_HUMAN;tr|M0QZK8|M0QZK8_HUMAN	0	0	NA	0	0	NA	0	0	NA	0	0	NA	0	0	NA	0	0	NA	0	0	NA	0	0	NA	0	0	NA	0	0	NA	0	0	NA	0	0	NA	0	0	NA	0	0	NA	5.5034
sp|O75298|RTN2_HUMAN	0	0	NA	0	0	NA	0	0	NA	0	0	NA	0	0	NA	1	1	1.3627	0	0	NA	0	0	NA	0	0	NA	0	0	NA	0	0	NA	0	0	NA	0	0	NA	0	0	NA	2.4561
sp|O75306|NDUS2_HUMAN	0	0	NA	0	0	NA	0	0	NA	0	0	NA	1	1	0.33684	1	1	0.38039	0	0	NA	0	0	NA	1	1	0.50317	0	0	NA	0	0	NA	0	0	NA	0	0	NA	0	0	NA	4.9877
sp|O75367|H2AY_HUMAN	1	1	0.36067	2	2	3.0422	2	2	0.61941	4	4	0.61273	6	6	1.9565	5	5	1.8909	7	7	1.5402	6	6	1.4429	2	2	1.7388	4	4	1.2776	6	6	0.86561	5	5	8.5451	5	5	2.041	5	5	7.2102	174.4
sp|O75369|FLNB_HUMAN	0	0	NA	0	0	NA	0	0	NA	0	0	NA	7	7	0.66457	9	9	0.66177	5	5	1.4268	5	5	0.9897	10	10	0.66158	6	6	1.3495	0	0	NA	0	0	NA	0	0	NA	0	0	NA	195.2
sp|O75390|CISY_HUMAN;tr|F8W031|F8W031_HUMAN	0	0	NA	0	0	NA	0	0	NA	0	0	NA	3	3	0.72164	2	2	0.68489	1	1	1.6704	0	0	NA	2	2	0.53107	0	0	NA	0	0	NA	0	0	NA	0	0	NA	0	0	NA	16.392
sp|O75400|PR40A_HUMAN;sp|Q6NWY9|PR40B_HUMAN	0	0	NA	0	0	NA	0	0	NA	0	0	NA	0	0	NA	0	0	NA	0	0	NA	0	0	NA	0	0	NA	0	0	NA	0	0	NA	0	0	NA	0	0	NA	0	0	NA	43.199
sp|O75436|VP26A_HUMAN;sp|Q4G0F5|VP26B_HUMAN	0	0	NA	0	0	NA	0	0	NA	0	0	NA	0	0	NA	0	0	NA	0	0	NA	0	0	NA	0	0	NA	0	0	NA	0	0	NA	0	0	NA	0	0	NA	0	0	NA	18.874
sp|Q9Y625|GPC6_HUMAN;sp|O75487|GPC4_HUMAN	0	0	NA	0	0	NA	0	0	NA	0	0	NA	0	0	NA	0	0	NA	0	0	NA	0	0	NA	0	0	NA	0	0	NA	0	0	NA	0	0	NA	0	0	NA	0	0	NA	2.7735
sp|O75494|SRS10_HUMAN	1	1	0.9931	1	1	0.69555	6	6	0.758	7	7	0.41023	2	2	2.9308	1	1	6.2003	9	9	0.28648	2	2	0.52538	2	2	1.9927	4	4	0.36471	9	9	0.4051	10	10	41.453	10	10	1.9075	11	11	7.3328	323.31
sp|O75496|GEMI_HUMAN	4	4	0.075395	6	6	3.939	7	7	0.44636	6	6	0.60958	8	8	0.72942	8	8	0.57386	9	9	0.21445	10	10	0.17245	5	5	0.55369	6	6	0.20912	0	0	NA	3	3	1.3327	1	1	3.1628	2	2	3.4819	323.31
sp|O75531|BAF_HUMAN	0	0	NA	0	0	NA	0	0	NA	0	0	NA	0	0	NA	0	0	NA	0	0	NA	0	0	NA	0	0	NA	0	0	NA	0	0	NA	0	0	NA	0	0	NA	0	0	NA	7.6422
sp|O75533|SF3B1_HUMAN	0	0	NA	0	0	NA	0	0	NA	2	2	0.66819	10	10	0.8115	5	5	0.8294	11	11	0.75351	6	6	0.56862	5	5	0.77623	8	8	0.54682	24	24	1.1944	27	27	10.101	23	23	3.3802	26	26	7.5363	323.31
sp|O75534|CSDE1_HUMAN	0	0	NA	0	0	NA	0	0	NA	0	0	NA	0	0	NA	1	1	1.792	0	0	NA	0	0	NA	0	0	NA	0	0	NA	0	0	NA	0	0	NA	0	0	NA	0	0	NA	49.573
sp|O75569|PRKRA_HUMAN	0	0	NA	0	0	NA	0	0	NA	1	1	0.42935	0	0	NA	0	0	NA	0	0	NA	1	1	NA	0	0	NA	0	0	NA	2	2	0.64078	2	2	NA	2	2	1.7716	2	2	3.7789	23.281
sp|O75592|MYCB2_HUMAN	0	0	NA	0	0	NA	0	0	NA	0	0	NA	1	1	0.006339	0	0	NA	0	0	NA	1	1	0.14472	0	0	NA	0	0	NA	0	0	NA	0	0	NA	0	0	NA	0	0	NA	2.042
sp|O75607|NPM3_HUMAN	0	0	NA	0	0	NA	0	0	NA	0	0	NA	0	0	NA	0	0	NA	0	0	NA	0	0	NA	1	1	NA	1	1	1.6818	0	0	NA	0	0	NA	0	0	NA	0	0	NA	13.25
sp|O75616|ERAL1_HUMAN	0	0	NA	0	0	NA	0	0	NA	0	0	NA	0	0	NA	0	0	NA	0	0	NA	0	0	NA	0	0	NA	0	0	NA	0	0	NA	0	0	NA	0	0	NA	0	0	NA	9.3537
sp|O75643|U520_HUMAN	1	1	0.26217	0	0	NA	3	3	0.82058	3	3	0.46755	19	19	0.96543	14	14	0.95148	16	16	0.89314	9	9	0.89772	18	18	0.98924	21	21	0.87243	56	56	1.2383	57	57	10.186	52	52	3.2298	54	54	7.7885	323.31
sp|O75663|TIPRL_HUMAN	0	0	NA	0	0	NA	0	0	NA	0	0	NA	0	0	NA	0	0	NA	0	0	NA	0	0	NA	0	0	NA	0	0	NA	0	0	NA	0	0	NA	0	0	NA	0	0	NA	19.421
sp|O75683|SURF6_HUMAN	0	0	NA	0	0	NA	0	0	NA	0	0	NA	1	1	1.7989	0	0	NA	1	1	0.637	1	1	0.35239	1	1	NA	0	0	NA	1	1	NA	2	2	NA	1	1	0.66066	0	0	NA	40.595
sp|O75688|PPM1B_HUMAN;sp|P35813|PPM1A_HUMAN	0	0	NA	0	0	NA	0	0	NA	0	0	NA	0	0	NA	0	0	NA	0	0	NA	0	0	NA	0	0	NA	0	0	NA	0	0	NA	0	0	NA	0	0	NA	1	1	NA	15.222
sp|O75691|UTP20_HUMAN	0	0	NA	0	0	NA	0	0	NA	0	0	NA	1	1	1.4501	0	0	NA	1	1	0.80185	1	1	0.67932	1	1	NA	1	1	NA	0	0	NA	1	1	NA	0	0	NA	0	0	NA	202.74
sp|O75694|NU155_HUMAN	0	0	NA	0	0	NA	0	0	NA	0	0	NA	7	7	0.47738	6	6	0.51237	2	2	0.95716	2	2	0.70033	4	4	0.57565	1	1	0.57385	0	0	NA	0	0	NA	0	0	NA	0	0	NA	40.825
sp|O75717|WDHD1_HUMAN	0	0	NA	0	0	NA	0	0	NA	0	0	NA	1	1	0.60496	1	1	0.43225	1	1	NA	1	1	0.56974	0	0	NA	0	0	NA	0	0	NA	0	0	NA	0	0	NA	0	0	NA	3.3116
sp|O75792|RNH2A_HUMAN	0	0	NA	0	0	NA	0	0	NA	0	0	NA	0	0	NA	0	0	NA	0	0	NA	0	0	NA	0	0	NA	0	0	NA	0	0	NA	0	0	NA	0	0	NA	0	0	NA	16.1
sp|O75821|EIF3G_HUMAN	0	0	NA	0	0	NA	0	0	NA	0	0	NA	0	0	NA	0	0	NA	0	0	NA	0	0	NA	0	0	NA	0	0	NA	0	0	NA	0	0	NA	0	0	NA	0	0	NA	22.469
sp|O75822|EIF3J_HUMAN	0	0	NA	0	0	NA	0	0	NA	0	0	NA	0	0	NA	0	0	NA	0	0	NA	0	0	NA	0	0	NA	0	0	NA	0	0	NA	0	0	NA	0	0	NA	0	0	NA	156.5
sp|O75828|CBR3_HUMAN	0	0	NA	0	0	NA	0	0	NA	0	0	NA	1	0	NA	1	0	NA	0	0	NA	0	0	NA	0	0	NA	0	0	NA	0	0	NA	0	0	NA	0	0	NA	0	0	NA	8.1645
sp|O75844|FACE1_HUMAN	0	0	NA	0	0	NA	0	0	NA	0	0	NA	0	0	NA	0	0	NA	0	0	NA	0	0	NA	0	0	NA	0	0	NA	0	0	NA	0	0	NA	0	0	NA	0	0	NA	-2
sp|O75934|SPF27_HUMAN	0	0	NA	0	0	NA	0	0	NA	0	0	NA	0	0	NA	0	0	NA	0	0	NA	0	0	NA	0	0	NA	0	0	NA	1	1	1.1191	2	2	4.0649	1	1	2.1804	1	1	15.633	125.71
sp|O75937|DNJC8_HUMAN	0	0	NA	0	0	NA	0	0	NA	0	0	NA	0	0	NA	0	0	NA	0	0	NA	0	0	NA	0	0	NA	0	0	NA	0	0	NA	0	0	NA	0	0	NA	0	0	NA	52.27
sp|O75940|SPF30_HUMAN	0	0	NA	0	0	NA	0	0	NA	0	0	NA	0	0	NA	0	0	NA	0	0	NA	0	0	NA	0	0	NA	0	0	NA	0	0	NA	0	0	NA	0	0	NA	0	0	NA	15.323
sp|O76003|GLRX3_HUMAN	0	0	NA	0	0	NA	0	0	NA	0	0	NA	0	0	NA	0	0	NA	0	0	NA	0	0	NA	0	0	NA	0	0	NA	0	0	NA	0	0	NA	0	0	NA	0	0	NA	2.4866
sp|O76021|RL1D1_HUMAN	0	0	NA	0	0	NA	0	0	NA	0	0	NA	3	3	1.533	1	1	1.2422	10	10	0.65625	7	7	0.60685	4	4	1.7119	8	8	0.80288	9	9	0.50224	2	2	NA	5	5	1.4795	3	3	4.5652	323.31
sp|O76071|CIAO1_HUMAN	0	0	NA	0	0	NA	0	0	NA	0	0	NA	0	0	NA	0	0	NA	0	0	NA	1	1	NA	0	0	NA	0	0	NA	0	0	NA	0	0	NA	0	0	NA	0	0	NA	2.0608
sp|O94760|DDAH1_HUMAN;sp|O95865|DDAH2_HUMAN	0	0	NA	0	0	NA	0	0	NA	0	0	NA	0	0	NA	0	0	NA	0	0	NA	0	0	NA	0	0	NA	0	0	NA	0	0	NA	0	0	NA	0	0	NA	0	0	NA	54.183
sp|O94763|RMP_HUMAN	0	0	NA	0	0	NA	0	0	NA	0	0	NA	0	0	NA	0	0	NA	0	0	NA	0	0	NA	0	0	NA	0	0	NA	0	0	NA	0	0	NA	0	0	NA	0	0	NA	34.172
sp|O94874|UFL1_HUMAN	0	0	NA	0	0	NA	0	0	NA	0	0	NA	0	0	NA	0	0	NA	0	0	NA	0	0	NA	0	0	NA	0	0	NA	0	0	NA	0	0	NA	0	0	NA	0	0	NA	2.2899
sp|O94887|FARP2_HUMAN	0	0	NA	0	0	NA	0	0	NA	0	0	NA	2	2	0.43692	3	3	0.2777	4	4	0.2857	2	2	0.41587	0	0	NA	3	3	0.43252	0	0	NA	0	0	NA	0	0	NA	0	0	NA	24.285
sp|O94901|SUN1_HUMAN	0	0	NA	0	0	NA	0	0	NA	0	0	NA	0	0	NA	0	0	NA	0	0	NA	0	0	NA	0	0	NA	0	0	NA	0	0	NA	0	0	NA	0	0	NA	0	0	NA	3.7236
sp|O94903|PROSC_HUMAN	0	0	NA	0	0	NA	0	0	NA	0	0	NA	0	0	NA	0	0	NA	0	0	NA	0	0	NA	0	0	NA	0	0	NA	0	0	NA	0	0	NA	0	0	NA	0	0	NA	6.4941
sp|O94905|ERLN2_HUMAN;sp|O75477|ERLN1_HUMAN	0	0	NA	0	0	NA	0	0	NA	0	0	NA	2	2	0.56019	2	2	0.48994	1	1	1.1908	2	2	1.0148	0	0	NA	0	0	NA	0	0	NA	0	0	NA	0	0	NA	0	0	NA	86.944
sp|O94906|PRP6_HUMAN	0	0	NA	0	0	NA	0	0	NA	0	0	NA	0	0	NA	0	0	NA	0	0	NA	1	1	1.0165	0	0	NA	0	0	NA	3	3	1.1665	2	2	4.8899	4	4	2.2447	4	4	4.3132	189.44
sp|O94966|UBP19_HUMAN	0	0	NA	0	0	NA	1	1	0.031536	0	0	NA	0	0	NA	1	1	NA	0	0	NA	1	1	NA	0	0	NA	0	0	NA	0	0	NA	0	0	NA	0	0	NA	0	0	NA	2.6863
sp|O94973|AP2A2_HUMAN;sp|O95782|AP2A1_HUMAN	0	0	NA	0	0	NA	0	0	NA	0	0	NA	0	0	NA	1	1	NA	0	0	NA	0	0	NA	0	0	NA	0	0	NA	0	0	NA	0	0	NA	0	0	NA	0	0	NA	2.6301
sp|O94979|SC31A_HUMAN	0	0	NA	0	0	NA	0	0	NA	0	0	NA	1	1	0.73226	0	0	NA	0	0	NA	0	0	NA	1	1	0.79495	1	1	NA	0	0	NA	0	0	NA	0	0	NA	0	0	NA	8.3101
sp|O95071|UBR5_HUMAN	0	0	NA	0	0	NA	0	0	NA	0	0	NA	1	1	NA	1	1	0.53498	2	2	0.58261	1	1	NA	1	1	0.58942	0	0	NA	0	0	NA	0	0	NA	0	0	NA	0	0	NA	36.695
sp|O95104|SFR15_HUMAN;sp|Q9UPN6|SCAF8_HUMAN	0	0	NA	0	0	NA	0	0	NA	0	0	NA	0	0	NA	0	0	NA	0	0	NA	0	0	NA	0	0	NA	0	0	NA	0	0	NA	0	0	NA	0	0	NA	0	0	NA	17.229
sp|O95163|ELP1_HUMAN	0	0	NA	0	0	NA	0	0	NA	0	0	NA	2	2	0.72796	2	2	0.57777	2	2	1.0575	1	1	1.888	0	0	NA	1	1	NA	0	0	NA	0	0	NA	0	0	NA	0	0	NA	33.65
sp|O95202|LETM1_HUMAN	0	0	NA	0	0	NA	0	0	NA	0	0	NA	1	1	0.35038	1	1	NA	0	0	NA	0	0	NA	0	0	NA	0	0	NA	0	0	NA	0	0	NA	0	0	NA	0	0	NA	4.3993
sp|O95232|LC7L3_HUMAN	0	0	NA	0	0	NA	0	0	NA	0	0	NA	0	0	NA	0	0	NA	1	1	0.32478	1	1	NA	0	0	NA	0	0	NA	1	1	NA	2	2	3.0205	1	1	0.54588	2	2	2.0856	108.51
sp|O95347|SMC2_HUMAN	0	0	NA	0	0	NA	0	0	NA	0	0	NA	1	1	0.51332	2	2	0.71852	0	0	NA	1	1	0.82096	2	2	0.8495	0	0	NA	0	0	NA	0	0	NA	0	0	NA	0	0	NA	11.953
sp|O95373|IPO7_HUMAN	3	3	0.23665	7	7	4.2459	6	6	0.62184	12	12	0.88525	17	17	0.62076	16	16	0.63577	12	12	0.96058	12	12	0.84501	10	10	0.53722	11	11	1.0312	0	0	NA	0	0	NA	0	0	NA	0	0	NA	263.3
sp|O95391|SLU7_HUMAN	0	0	NA	0	0	NA	0	0	NA	0	0	NA	0	0	NA	0	0	NA	0	0	NA	1	1	NA	0	0	NA	0	0	NA	1	1	0.85664	1	1	NA	2	2	1.839	3	3	3.9661	17.53
sp|O95399|UTS2_HUMAN	0	0	NA	0	0	NA	0	0	NA	0	0	NA	1	1	0.38293	1	1	0.35664	1	1	0.43395	1	1	0.37042	0	0	NA	0	0	NA	1	1	0.38693	0	0	NA	1	1	NA	0	0	NA	2.2552
sp|O95400|CD2B2_HUMAN	0	0	NA	0	0	NA	0	0	NA	0	0	NA	0	0	NA	0	0	NA	0	0	NA	0	0	NA	0	0	NA	0	0	NA	0	0	NA	0	0	NA	0	0	NA	0	0	NA	5.6973
sp|O95425|SVIL_HUMAN	0	0	NA	0	0	NA	0	0	NA	0	0	NA	0	0	NA	0	0	NA	1	1	0.93395	0	0	NA	0	0	NA	0	0	NA	0	0	NA	0	0	NA	0	0	NA	0	0	NA	34.863
sp|O95433|AHSA1_HUMAN	0	0	NA	0	0	NA	0	0	NA	0	0	NA	0	0	NA	1	1	0.49861	1	1	1.376	1	1	1.421	0	0	NA	1	1	0.96051	0	0	NA	0	0	NA	0	0	NA	0	0	NA	5.0407
sp|O95456|PSMG1_HUMAN	0	0	NA	0	0	NA	0	0	NA	0	0	NA	0	0	NA	0	0	NA	0	0	NA	0	0	NA	0	0	NA	0	0	NA	0	0	NA	0	0	NA	0	0	NA	0	0	NA	24.333
sp|O95470|SGPL1_HUMAN	0	0	NA	0	0	NA	1	1	0.39597	1	1	0.027019	0	0	NA	0	0	NA	0	0	NA	0	0	NA	0	0	NA	0	0	NA	0	0	NA	0	0	NA	0	0	NA	0	0	NA	2.0372
sp|O95478|NSA2_HUMAN	0	0	NA	0	0	NA	0	0	NA	0	0	NA	0	0	NA	0	0	NA	1	1	0.83357	0	0	NA	0	0	NA	0	0	NA	0	0	NA	1	1	1.8191	0	0	NA	1	1	2.6353	4.2543
sp|O95487|SC24B_HUMAN;sp|O95486|SC24A_HUMAN	0	0	NA	0	0	NA	0	0	NA	0	0	NA	1	1	0.59039	1	1	0.85211	1	1	0.87329	0	0	NA	0	0	NA	0	0	NA	0	0	NA	0	0	NA	1	1	1.7526	0	0	NA	2.1491
sp|O95573|ACSL3_HUMAN;sp|O60488|ACSL4_HUMAN	0	0	NA	0	0	NA	0	0	NA	0	0	NA	1	1	0.74089	1	1	0.81138	1	1	NA	1	1	0.89015	1	1	NA	0	0	NA	0	0	NA	0	0	NA	0	0	NA	0	0	NA	7.3381
sp|O95625|ZBT11_HUMAN	0	0	NA	0	0	NA	0	0	NA	0	0	NA	0	0	NA	0	0	NA	1	1	0.61423	0	0	NA	0	0	NA	0	0	NA	0	0	NA	0	0	NA	0	0	NA	0	0	NA	2.9292
sp|O95721|SNP29_HUMAN	0	0	NA	0	0	NA	0	0	NA	0	0	NA	0	0	NA	0	0	NA	0	0	NA	0	0	NA	0	0	NA	0	0	NA	0	0	NA	0	0	NA	0	0	NA	0	0	NA	7.2776
sp|O95749|GGPPS_HUMAN	0	0	NA	0	0	NA	0	0	NA	0	0	NA	0	0	NA	0	0	NA	0	0	NA	0	0	NA	0	0	NA	0	0	NA	0	0	NA	0	0	NA	0	0	NA	0	0	NA	2.184
sp|O95757|HS74L_HUMAN	0	0	NA	0	0	NA	0	0	NA	0	0	NA	7	5	0.62928	8	6	0.56216	3	1	0.88119	3	1	1.6503	1	0	NA	2	1	NA	0	0	NA	0	0	NA	0	0	NA	0	0	NA	33.715
sp|O95777|LSM8_HUMAN	0	0	NA	0	0	NA	0	0	NA	0	0	NA	0	0	NA	0	0	NA	0	0	NA	0	0	NA	0	0	NA	0	0	NA	0	0	NA	0	0	NA	0	0	NA	0	0	NA	3.2726
sp|O95793|STAU1_HUMAN	0	0	NA	0	0	NA	0	0	NA	0	0	NA	0	0	NA	0	0	NA	0	0	NA	0	0	NA	0	0	NA	0	0	NA	0	0	NA	0	0	NA	0	0	NA	0	0	NA	59.874
sp|O95816|BAG2_HUMAN	1	1	0.27786	1	1	1.2474	2	2	0.52693	3	3	0.75371	6	6	0.40582	3	3	0.42231	3	3	0.44233	4	4	0.35774	6	6	0.33497	6	6	0.34207	0	0	NA	0	0	NA	0	0	NA	0	0	NA	97.698
sp|O95831|AIFM1_HUMAN	8	8	0.30242	12	12	4.1813	9	9	0.4749	11	11	0.78465	21	21	0.52768	16	16	0.45533	18	18	0.58523	18	18	0.48535	13	13	0.43723	15	15	0.53381	0	0	NA	0	0	NA	0	0	NA	0	0	NA	323.31
sp|O95861|BPNT1_HUMAN	0	0	NA	0	0	NA	0	0	NA	0	0	NA	0	0	NA	0	0	NA	0	0	NA	0	0	NA	0	0	NA	0	0	NA	0	0	NA	0	0	NA	0	0	NA	0	0	NA	173.28
sp|O95900|TRUB2_HUMAN	0	0	NA	0	0	NA	0	0	NA	0	0	NA	0	0	NA	0	0	NA	0	0	NA	0	0	NA	0	0	NA	0	0	NA	0	0	NA	0	0	NA	0	0	NA	0	0	NA	60.391
sp|O95983|MBD3_HUMAN	0	0	NA	0	0	NA	0	0	NA	0	0	NA	0	0	NA	0	0	NA	0	0	NA	0	0	NA	0	0	NA	0	0	NA	0	0	NA	0	0	NA	0	0	NA	0	0	NA	7.7778
sp|O95985|TOP3B_HUMAN	0	0	NA	0	0	NA	0	0	NA	0	0	NA	0	0	NA	0	0	NA	1	1	4.4631	0	0	NA	0	0	NA	1	1	1.5491	1	1	0.31374	0	0	NA	0	0	NA	0	0	NA	3.9239
sp|O96008|TOM40_HUMAN	0	0	NA	0	0	NA	0	0	NA	0	0	NA	1	1	0.93944	2	2	0.91337	0	0	NA	0	0	NA	1	1	NA	1	1	1.1831	0	0	NA	0	0	NA	0	0	NA	0	0	NA	10.089
sp|O96011|PX11B_HUMAN	0	0	NA	0	0	NA	0	0	NA	0	0	NA	0	0	NA	1	1	5.2899	0	0	NA	0	0	NA	0	0	NA	0	0	NA	0	0	NA	0	0	NA	0	0	NA	0	0	NA	3.4455
sp|P00338|LDHA_HUMAN;sp|Q6ZMR3|LDH6A_HUMAN;sp|P07864|LDHC_HUMAN	1	1	1.0223	1	1	3.191	3	3	0.79762	2	2	0.84555	11	11	0.66251	10	10	0.62993	7	7	2.4316	6	6	2.1055	7	7	0.62456	4	4	2.038	1	1	NA	2	2	NA	0	0	NA	1	1	5.4886	250.8
sp|P00367|DHE3_HUMAN;sp|P49448|DHE4_HUMAN	1	1	1.1401	0	0	NA	0	0	NA	0	0	NA	8	8	0.57674	12	12	0.48011	2	2	1.2528	6	6	1.1923	2	2	0.39555	2	2	1.1565	0	0	NA	0	0	NA	0	0	NA	0	0	NA	80.805
sp|P00387|NB5R3_HUMAN	0	0	NA	0	0	NA	0	0	NA	0	0	NA	1	1	NA	0	0	NA	0	0	NA	0	0	NA	0	0	NA	0	0	NA	0	0	NA	0	0	NA	0	0	NA	0	0	NA	155.79
sp|P00403|COX2_HUMAN	0	0	NA	0	0	NA	0	0	NA	3	3	1.0278	2	2	0.44944	1	1	0.53567	2	2	0.66895	1	1	0.59679	3	3	0.51582	1	1	0.95633	0	0	NA	0	0	NA	0	0	NA	0	0	NA	69.751
sp|P00491|PNPH_HUMAN	0	0	NA	0	0	NA	0	0	NA	0	0	NA	0	0	NA	0	0	NA	0	0	NA	0	0	NA	0	0	NA	0	0	NA	0	0	NA	0	0	NA	0	0	NA	0	0	NA	91.233
sp|P00492|HPRT_HUMAN	0	0	NA	0	0	NA	1	1	0.41197	0	0	NA	4	4	0.69907	4	4	0.62094	2	2	1.8319	0	0	NA	0	0	NA	0	0	NA	0	0	NA	0	0	NA	0	0	NA	0	0	NA	14.361
sp|P00505|AATM_HUMAN	0	0	NA	0	0	NA	0	0	NA	0	0	NA	5	5	0.8128	3	3	0.47811	0	0	NA	0	0	NA	0	0	NA	0	0	NA	0	0	NA	0	0	NA	0	0	NA	0	0	NA	22.527
sp|P00558|PGK1_HUMAN	0	0	NA	0	0	NA	0	0	NA	0	0	NA	5	5	0.83805	3	3	0.68097	1	1	NA	2	2	1.185	0	0	NA	1	1	NA	0	0	NA	0	0	NA	0	0	NA	0	0	NA	25.925
sp|P00918|CAH2_HUMAN	0	0	NA	0	0	NA	0	0	NA	0	0	NA	1	1	1.4848	0	0	NA	1	1	1.3167	0	0	NA	0	0	NA	0	0	NA	0	0	NA	0	0	NA	0	0	NA	0	0	NA	18.802
sp|P01040|CYTA_HUMAN	0	0	NA	0	0	NA	0	0	NA	0	0	NA	0	0	NA	0	0	NA	0	0	NA	0	0	NA	1	1	0.20119	2	2	0.17355	0	0	NA	0	0	NA	0	0	NA	0	0	NA	7.9665
sp|P01282|VIP_HUMAN	0	0	NA	0	0	NA	0	0	NA	0	0	NA	0	0	NA	0	0	NA	0	0	NA	0	0	NA	0	0	NA	0	0	NA	0	0	NA	1	1	NA	0	0	NA	0	0	NA	2.681
sp|P01591|IGJ_HUMAN	0	0	NA	0	0	NA	0	0	NA	0	0	NA	0	0	NA	0	0	NA	0	0	NA	0	0	NA	0	0	NA	0	0	NA	0	0	NA	0	0	NA	0	0	NA	0	0	NA	3.0438
sp|P01605|KV113_HUMAN	0	0	NA	0	0	NA	0	0	NA	0	0	NA	0	0	NA	0	0	NA	0	0	NA	0	0	NA	0	0	NA	0	0	NA	0	0	NA	0	0	NA	0	0	NA	0	0	NA	15.54
sp|P01625|KV402_HUMAN;sp|P06312|KV401_HUMAN;sp|P06313|KV403_HUMAN;sp|P06314|KV404_HUMAN;sp|P83593|KV405_HUMAN	1	1	0.0085902	1	1	NA	0	0	NA	0	0	NA	0	0	NA	0	0	NA	0	0	NA	0	0	NA	0	0	NA	0	0	NA	0	0	NA	0	0	NA	0	0	NA	0	0	NA	12.266
sp|P01764|HV303_HUMAN	1	1	0.073686	1	1	0.059022	0	0	NA	0	0	NA	0	0	NA	0	0	NA	0	0	NA	0	0	NA	0	0	NA	0	0	NA	0	0	NA	0	0	NA	0	0	NA	0	0	NA	119.47
sp|P01834|IGKC_HUMAN	0	0	NA	0	0	NA	0	0	NA	0	0	NA	0	0	NA	0	0	NA	0	0	NA	0	0	NA	0	0	NA	0	0	NA	0	0	NA	0	0	NA	0	0	NA	0	0	NA	8.5168
sp|P01860|IGHG3_HUMAN	0	0	NA	0	0	NA	0	0	NA	0	0	NA	1	1	0.069059	0	0	NA	0	0	NA	1	1	0.67435	0	0	NA	0	0	NA	0	0	NA	0	0	NA	0	0	NA	0	0	NA	2.0344
sp|P01876|IGHA1_HUMAN;sp|P01877|IGHA2_HUMAN	0	0	NA	0	0	NA	0	0	NA	0	0	NA	0	0	NA	0	0	NA	0	0	NA	0	0	NA	0	0	NA	0	0	NA	0	0	NA	0	0	NA	0	0	NA	0	0	NA	5.7645
sp|P01893|HLAH_HUMAN;sp|Q31612|1B73_HUMAN;sp|P01891|1A68_HUMAN;sp|Q95604|1C17_HUMAN	0	0	NA	0	0	NA	0	0	NA	0	0	NA	1	1	0.34627	1	1	0.52524	1	1	0.29646	1	1	0.47672	0	0	NA	0	0	NA	0	0	NA	0	0	NA	0	0	NA	0	0	NA	9.0782
sp|P02452|CO1A1_HUMAN	0	0	NA	0	0	NA	0	0	NA	0	0	NA	0	0	NA	0	0	NA	0	0	NA	0	0	NA	0	0	NA	0	0	NA	0	0	NA	0	0	NA	0	0	NA	0	0	NA	7.3861
sp|P02545|LMNA_HUMAN	0	0	NA	0	0	NA	1	0	NA	0	0	NA	3	2	0.65513	6	5	0.5474	3	2	0.44946	2	2	0.44814	3	3	0.45657	1	1	0.50951	0	0	NA	0	0	NA	0	0	NA	0	0	NA	25.059
sp|P02786|TFR1_HUMAN	0	0	NA	0	0	NA	0	0	NA	0	0	NA	7	7	0.35248	5	5	0.34071	0	0	NA	0	0	NA	3	3	0.1929	0	0	NA	0	0	NA	0	0	NA	0	0	NA	0	0	NA	13.729
sp|P02788|TRFL_HUMAN;CON__Q29443;CON__Q0IIK2	0	0	NA	0	0	NA	0	0	NA	0	0	NA	0	0	NA	0	0	NA	0	0	NA	0	0	NA	0	0	NA	0	0	NA	0	0	NA	1	1	0.37887	0	0	NA	0	0	NA	30.973
sp|P04040|CATA_HUMAN	0	0	NA	0	0	NA	0	0	NA	0	0	NA	0	0	NA	0	0	NA	0	0	NA	0	0	NA	0	0	NA	0	0	NA	0	0	NA	0	0	NA	0	0	NA	0	0	NA	7.6761
sp|P04075|ALDOA_HUMAN;sp|P05062|ALDOB_HUMAN	1	1	1.0638	0	0	NA	0	0	NA	0	0	NA	9	9	0.66567	12	12	0.5996	3	3	2.3081	3	3	2.3508	6	6	0.53542	4	4	3.088	0	0	NA	0	0	NA	0	0	NA	0	0	NA	126.37
sp|P04080|CYTB_HUMAN	0	0	NA	0	0	NA	0	0	NA	0	0	NA	0	0	NA	0	0	NA	0	0	NA	0	0	NA	0	0	NA	0	0	NA	0	0	NA	0	0	NA	0	0	NA	0	0	NA	2.447
sp|P04083|ANXA1_HUMAN	0	0	NA	0	0	NA	0	0	NA	0	0	NA	0	0	NA	0	0	NA	0	0	NA	0	0	NA	0	0	NA	0	0	NA	0	0	NA	0	0	NA	0	0	NA	0	0	NA	78.799
sp|P04181|OAT_HUMAN	0	0	NA	0	0	NA	0	0	NA	0	0	NA	1	1	0.331	1	1	NA	0	0	NA	0	0	NA	1	1	0.82526	0	0	NA	0	0	NA	0	0	NA	0	0	NA	0	0	NA	6.2447
sp|P04259|K2C6B_HUMAN	10	0	NA	23	1	0.34429	20	1	0.085487	17	0	NA	12	1	NA	5	0	NA	9	0	NA	8	0	NA	15	0	NA	11	0	NA	30	3	NA	11	0	NA	21	2	NA	6	0	NA	36.224
sp|P04264|K2C1_HUMAN;CON__P04264	31	28	0.026698	34	31	0.026108	31	29	0.033071	41	38	0.018994	33	31	0.048302	30	28	0.046807	28	26	0.10995	32	30	0.045982	36	34	0.027769	36	34	0.020266	30	28	0.0356	26	26	0.01484	25	24	0.017291	20	20	0.028992	323.31	+
sp|P04279|SEMG1_HUMAN	0	0	NA	0	0	NA	0	0	NA	0	0	NA	0	0	NA	0	0	NA	0	0	NA	1	1	0.61911	0	0	NA	0	0	NA	0	0	NA	0	0	NA	0	0	NA	0	0	NA	4.5665
sp|P04350|TBB4A_HUMAN	15	1	0.46428	16	0	NA	15	0	NA	17	0	NA	22	2	0.62175	22	3	0.63708	21	2	1.2071	20	1	0.72893	20	1	NA	18	1	0.66617	10	0	NA	9	0	NA	7	0	NA	8	0	NA	36.909
sp|P04406|G3P_HUMAN	2	2	0.80226	4	4	1.6897	5	5	0.77609	7	7	0.71541	8	8	0.68554	8	8	0.60703	6	6	2.0631	5	5	1.6869	5	5	0.63361	4	4	1.7388	5	5	0.17784	5	5	1.2596	2	2	0.41862	3	3	1.4092	323.31
sp|P04637|P53_HUMAN	1	1	0.21832	0	0	NA	2	2	0.31414	3	3	0.45234	3	3	1.1536	1	1	0.97799	3	3	0.67714	6	6	1.247	2	2	0.84515	3	3	0.72303	0	0	NA	1	1	NA	0	0	NA	1	1	NA	49.241
sp|P04792|HSPB1_HUMAN	0	0	NA	0	0	NA	1	1	0.23846	1	1	0.40269	2	2	1.0882	1	1	1.111	0	0	NA	0	0	NA	1	1	2.225	0	0	NA	0	0	NA	0	0	NA	0	0	NA	0	0	NA	12.932
sp|P04818|TYSY_HUMAN	0	0	NA	0	0	NA	0	0	NA	0	0	NA	0	0	NA	0	0	NA	0	0	NA	0	0	NA	0	0	NA	0	0	NA	0	0	NA	0	0	NA	0	0	NA	0	0	NA	3.1782
sp|P04843|RPN1_HUMAN	4	4	0.60284	5	5	3.133	5	5	0.67591	8	8	0.83262	19	19	0.5248	14	14	0.46864	14	14	1.1495	15	15	0.91291	14	14	0.4976	9	9	0.89236	0	0	NA	0	0	NA	0	0	NA	0	0	NA	152.35
sp|P04844|RPN2_HUMAN	0	0	NA	0	0	NA	1	1	0.46225	1	1	NA	9	9	0.58326	7	7	0.5808	6	6	1.1511	3	3	1.2763	4	4	0.51704	3	3	0.92716	0	0	NA	0	0	NA	0	0	NA	0	0	NA	138.61
sp|Q93077|H2A1C_HUMAN;sp|Q7L7L0|H2A3_HUMAN;sp|P04908|H2A1B_HUMAN	3	0	NA	4	0	NA	4	1	0.64312	5	1	0.91965	5	1	1.6907	5	1	1.6864	5	1	1.6474	5	1	1.1663	3	0	NA	3	0	NA	5	1	0.52665	4	1	NA	5	1	1.8025	4	1	4.7643	17.699
sp|P05023|AT1A1_HUMAN;sp|P50993|AT1A2_HUMAN;sp|Q13733|AT1A4_HUMAN;sp|P20648|ATP4A_HUMAN	4	4	0.2507	1	1	3.7146	3	3	0.50917	2	2	0.80242	21	21	0.46874	23	23	0.41373	20	20	0.67375	20	20	0.53964	17	17	0.37909	17	17	0.58118	0	0	NA	0	0	NA	0	0	NA	0	0	NA	323.31
sp|P05089|ARGI1_HUMAN	0	0	NA	0	0	NA	0	0	NA	0	0	NA	0	0	NA	0	0	NA	0	0	NA	1	1	0.055152	0	0	NA	1	1	0.5555	0	0	NA	0	0	NA	0	0	NA	0	0	NA	10.013
sp|P05090|APOD_HUMAN	0	0	NA	0	0	NA	1	1	0.22195	1	1	0.11649	0	0	NA	0	0	NA	0	0	NA	0	0	NA	0	0	NA	0	0	NA	0	0	NA	0	0	NA	0	0	NA	1	1	0.065112	2.7369
sp|P05109|S10A8_HUMAN	0	0	NA	0	0	NA	0	0	NA	0	0	NA	0	0	NA	0	0	NA	0	0	NA	0	0	NA	0	0	NA	1	1	0.95059	0	0	NA	0	0	NA	0	0	NA	0	0	NA	48.497
sp|P05141|ADT2_HUMAN;sp|Q9H0C2|ADT4_HUMAN	6	6	0.40166	7	7	2.5889	16	16	0.56617	13	13	0.78558	16	16	0.56987	14	14	0.5489	15	15	0.71848	13	13	0.5758	14	14	0.47323	13	13	0.60071	10	10	0.59487	8	8	9.2069	9	9	2.2842	6	6	6.7893	323.31
sp|P05198|IF2A_HUMAN	0	0	NA	0	0	NA	0	0	NA	0	0	NA	0	0	NA	0	0	NA	1	1	0.55858	0	0	NA	0	0	NA	0	0	NA	0	0	NA	0	0	NA	0	0	NA	0	0	NA	121.15
sp|P05386|RLA1_HUMAN	1	1	0.43194	0	0	NA	1	1	1.654	1	1	0.24847	2	2	1.3501	1	1	1.7521	2	2	0.36466	2	2	0.33659	1	1	1.4383	2	2	0.33879	0	0	NA	0	0	NA	0	0	NA	0	0	NA	94.091
sp|P05387|RLA2_HUMAN	0	0	NA	0	0	NA	0	0	NA	0	0	NA	0	0	NA	1	1	1.7909	4	4	0.40624	2	2	0.79485	3	3	1.2817	3	3	0.33247	0	0	NA	1	1	0.46958	0	0	NA	0	0	NA	323.31
sp|P05388|RLA0_HUMAN;sp|Q8NHW5|RLA0L_HUMAN	6	6	0.38995	6	6	1.1147	5	5	2.3125	7	7	0.18572	10	10	1.5809	8	8	1.6235	15	15	0.48577	8	8	0.50777	9	9	1.5464	10	10	0.50869	9	9	0.90596	6	6	10.23	7	7	3.0223	6	6	6.4779	323.31
sp|P05455|LA_HUMAN	0	0	NA	0	0	NA	0	0	NA	0	0	NA	1	1	1.8115	1	1	1.4719	2	2	0.53085	1	1	0.67954	2	2	1.2987	3	3	0.82722	1	1	0.16073	1	1	NA	1	1	1.4965	1	1	3.2519	125.25
sp|P05783|K1C18_HUMAN;CON__H-INV:HIT000015463	1	0	NA	1	0	NA	1	0	NA	1	0	NA	1	0	NA	1	0	NA	1	0	NA	1	0	NA	1	0	NA	1	0	NA	1	0	NA	0	0	NA	0	0	NA	1	0	NA	59.641
sp|P06396|GELS_HUMAN;CON__Q3SX14;REV__sp|Q6TDU7|CASC1_HUMAN	0	0	NA	0	0	NA	0	0	NA	0	0	NA	0	0	NA	0	0	NA	0	0	NA	0	0	NA	0	0	NA	0	0	NA	0	0	NA	0	0	NA	0	0	NA	0	0	NA	18.252	+
sp|P06454|PTMA_HUMAN	0	0	NA	0	0	NA	0	0	NA	0	0	NA	0	0	NA	0	0	NA	0	0	NA	0	0	NA	0	0	NA	0	0	NA	0	0	NA	0	0	NA	0	0	NA	0	0	NA	30.713
sp|P06493|CDK1_HUMAN	0	0	NA	0	0	NA	0	0	NA	0	0	NA	1	1	1.0171	2	2	1.1111	1	1	1.6847	2	2	2.9679	0	0	NA	0	0	NA	0	0	NA	0	0	NA	0	0	NA	0	0	NA	52.727
sp|P06576|ATPB_HUMAN	4	4	2.5191	0	0	NA	5	5	0.84734	6	6	1.1145	15	15	0.61493	17	17	0.58375	11	11	1.5661	6	6	1.1234	9	9	0.55257	3	3	1.4515	0	0	NA	0	0	NA	0	0	NA	0	0	NA	282.48
sp|P06702|S10A9_HUMAN	0	0	NA	0	0	NA	0	0	NA	0	0	NA	0	0	NA	0	0	NA	0	0	NA	0	0	NA	0	0	NA	0	0	NA	0	0	NA	0	0	NA	0	0	NA	0	0	NA	55.052
sp|P06733|ENOA_HUMAN;sp|P13929|ENOB_HUMAN	3	3	1.6243	4	4	2.556	3	3	0.75375	1	1	0.83365	16	16	0.75793	16	16	0.67397	15	15	1.8153	7	7	1.9595	11	11	0.63072	7	7	2.1872	1	1	0.24425	4	4	1.9497	0	0	NA	1	1	1.4233	323.31
sp|P06737|PYGL_HUMAN	0	0	NA	0	0	NA	0	0	NA	0	0	NA	14	14	0.62507	13	13	0.52497	20	20	0.47514	8	8	1.7607	11	11	0.54985	2	2	1.4714	0	0	NA	0	0	NA	0	0	NA	0	0	NA	130.19
sp|P06744|G6PI_HUMAN;CON__Q3ZBD7	0	0	NA	0	0	NA	0	0	NA	0	0	NA	2	2	0.74683	4	4	0.70381	1	1	1.9094	2	2	2.1111	3	3	0.53612	0	0	NA	0	0	NA	0	0	NA	0	0	NA	0	0	NA	28.94
sp|P06748|NPM_HUMAN	3	3	4.1414	0	0	NA	2	2	0.6236	4	4	0.62425	3	3	1.1644	2	2	1.1364	5	5	1.0261	2	2	0.99217	2	2	1.0613	2	2	1.1969	1	1	0.33602	1	1	NA	0	0	NA	0	0	NA	323.31
sp|P06753|TPM3_HUMAN	0	0	NA	0	0	NA	0	0	NA	0	0	NA	0	0	NA	0	0	NA	0	0	NA	0	0	NA	0	0	NA	0	0	NA	0	0	NA	0	0	NA	0	0	NA	0	0	NA	39.891
sp|Q16778|H2B2E_HUMAN;sp|P33778|H2B1B_HUMAN;sp|P23527|H2B1O_HUMAN;sp|P06899|H2B1J_HUMAN	4	1	0.47827	4	1	4.5734	4	2	0.78699	5	1	0.6432	4	1	2.3249	5	2	2.7036	5	2	1.2242	5	2	1.4318	4	1	1.7515	5	2	1.2264	5	2	0.72036	5	1	9.8594	5	2	2.1854	5	2	5.9823	39.914
sp|P07195|LDHB_HUMAN	2	1	1.1813	3	2	NA	1	0	NA	3	2	1.1966	10	9	0.69519	10	10	0.63778	7	7	2.2284	6	6	2.1971	10	9	0.60624	8	7	2.0926	2	2	0.33319	2	1	2.9058	0	0	NA	1	0	NA	232.77
sp|P07196|NFL_HUMAN	1	0	NA	0	0	NA	1	0	NA	1	0	NA	5	3	0.58161	5	3	0.33656	4	3	0.27411	7	5	0.3251	1	1	0.56107	3	2	0.38545	1	0	NA	1	0	NA	1	0	NA	1	0	NA	85.337
sp|P07197|NFM_HUMAN	1	0	NA	0	0	NA	1	0	NA	1	0	NA	3	2	0.46399	3	2	0.18182	1	0	NA	3	2	0.28534	0	0	NA	1	0	NA	1	0	NA	1	0	NA	1	0	NA	1	0	NA	323.31
sp|P07237|PDIA1_HUMAN	0	0	NA	0	0	NA	0	0	NA	0	0	NA	3	3	0.61373	3	3	0.49943	1	1	1.5044	2	2	1.1341	3	3	0.57886	0	0	NA	0	0	NA	0	0	NA	0	0	NA	0	0	NA	41.992
sp|P07305|H10_HUMAN	0	0	NA	0	0	NA	0	0	NA	0	0	NA	0	0	NA	0	0	NA	0	0	NA	0	0	NA	0	0	NA	0	0	NA	0	0	NA	0	0	NA	0	0	NA	0	0	NA	7.9155
sp|P07339|CATD_HUMAN;tr|H7C469|H7C469_HUMAN	0	0	NA	0	0	NA	0	0	NA	0	0	NA	0	0	NA	0	0	NA	0	0	NA	0	0	NA	0	0	NA	0	0	NA	0	0	NA	0	0	NA	0	0	NA	0	0	NA	8.4613
sp|P07355|ANXA2_HUMAN;sp|A6NMY6|AXA2L_HUMAN	0	0	NA	0	0	NA	0	0	NA	3	3	0.19994	3	3	0.67682	1	1	0.38726	0	0	NA	1	1	0.41252	0	0	NA	2	2	0.38274	1	1	NA	1	1	NA	0	0	NA	0	0	NA	111.99
sp|P07437|TBB5_HUMAN	18	5	0.32058	22	5	3.3318	18	4	0.63797	23	6	0.91785	26	6	0.57218	25	6	0.51763	25	6	0.82958	25	5	0.67035	25	5	0.46304	21	5	0.83821	12	3	1.0192	12	3	6.4404	10	3	3.6441	10	3	5.4993	323.31
sp|P07478|TRY2_HUMAN	0	0	NA	0	0	NA	0	0	NA	0	0	NA	1	1	NA	1	1	NA	1	1	NA	1	1	0.45101	1	1	1.4261	1	1	1.9004	0	0	NA	1	1	NA	0	0	NA	0	0	NA	37.416
sp|P07737|PROF1_HUMAN;CON__P02584	0	0	NA	0	0	NA	0	0	NA	0	0	NA	2	2	0.82114	1	1	0.63659	1	1	1.4	1	1	2.3723	3	3	0.58702	0	0	NA	0	0	NA	0	0	NA	0	0	NA	0	0	NA	18.765
sp|P07814|SYEP_HUMAN	0	0	NA	0	0	NA	0	0	NA	0	0	NA	36	36	0.68201	33	33	0.62478	28	28	0.96324	19	19	0.89983	22	22	0.57158	14	14	0.99586	0	0	NA	0	0	NA	0	0	NA	0	0	NA	323.31
sp|P07900|HS90A_HUMAN;sp|Q58FG0|HS905_HUMAN	18	10	0.39206	20	11	5.2836	19	11	0.64632	23	14	0.91954	39	24	0.52308	41	26	0.45333	32	19	1.5358	32	21	1.3863	36	21	0.44361	27	16	1.3297	10	6	0.79418	9	6	2.7635	5	2	1.1534	6	4	2.1614	323.31
sp|P07910|HNRPC_HUMAN;sp|B2RXH8|HNRC2_HUMAN;sp|Q86SE5|RALYL_HUMAN	15	15	0.13091	11	11	2.8888	17	17	0.43582	25	25	0.54432	19	19	4.0248	16	16	4.7585	17	17	3.0138	17	17	4.2858	11	11	3.8205	11	11	3.398	11	11	0.73951	9	9	11.689	12	12	2.6926	8	8	6.9827	323.31
sp|P07951|TPM2_HUMAN;CON__Q3SX28	0	0	NA	0	0	NA	0	0	NA	0	0	NA	0	0	NA	0	0	NA	0	0	NA	0	0	NA	0	0	NA	0	0	NA	0	0	NA	0	0	NA	0	0	NA	0	0	NA	2.0162	+
sp|Q3SY56|SP6_HUMAN;sp|P0CG40|SP9_HUMAN;sp|Q8IXZ3|SP8_HUMAN;sp|Q02086|SP2_HUMAN;sp|Q02447|SP3_HUMAN;sp|Q02446|SP4_HUMAN;sp|P08047|SP1_HUMAN	0	0	NA	0	0	NA	0	0	NA	0	0	NA	1	1	4.3875	0	0	NA	0	0	NA	0	0	NA	0	0	NA	0	0	NA	0	0	NA	0	0	NA	0	0	NA	0	0	NA	5.1105
sp|P08133|ANXA6_HUMAN	0	0	NA	0	0	NA	0	0	NA	0	0	NA	0	0	NA	0	0	NA	0	0	NA	0	0	NA	1	1	NA	0	0	NA	0	0	NA	0	0	NA	0	0	NA	0	0	NA	4.1626
sp|P08195|4F2_HUMAN	0	0	NA	0	0	NA	1	1	1.1097	2	2	0.76983	5	5	0.50472	5	5	0.51468	2	2	0.805	2	2	1.4184	4	4	0.51307	3	3	1.0745	0	0	NA	0	0	NA	0	0	NA	0	0	NA	47.768
sp|P08238|HS90B_HUMAN;sp|Q58FF7|H90B3_HUMAN	20	20	0.37261	21	21	4.4232	20	20	0.64858	24	24	0.89447	39	39	0.56266	39	39	0.49723	33	33	1.4018	30	30	1.2338	32	32	0.48838	28	28	1.1834	12	12	0.59134	10	10	4.8498	8	8	2.1562	8	8	4.0478	323.31
sp|P08243|ASNS_HUMAN	0	0	NA	0	0	NA	0	0	NA	0	0	NA	3	3	0.66272	3	3	0.61012	3	3	1.8801	1	1	2.2967	1	1	0.82908	0	0	NA	0	0	NA	0	0	NA	0	0	NA	0	0	NA	34.648
sp|P08574|CY1_HUMAN	0	0	NA	0	0	NA	0	0	NA	0	0	NA	0	0	NA	0	0	NA	0	0	NA	0	0	NA	1	1	0.91385	1	1	1.2023	0	0	NA	0	0	NA	0	0	NA	0	0	NA	4.8667
sp|P08579|RU2B_HUMAN	0	0	NA	0	0	NA	0	0	NA	0	0	NA	0	0	NA	0	0	NA	0	0	NA	0	0	NA	0	0	NA	0	0	NA	4	4	1.2278	4	4	9.5217	5	5	2.8931	4	4	5.4058	49.04
sp|P08621|RU17_HUMAN	0	0	NA	0	0	NA	1	1	0.50377	0	0	NA	5	5	1.169	7	7	1.0538	10	10	0.40115	8	8	0.3827	3	3	0.85681	6	6	0.41516	14	14	0.42654	14	14	567.74	13	13	1.7651	9	9	6.5722	276.38
sp|P08631|HCK_HUMAN	0	0	NA	0	0	NA	0	0	NA	0	0	NA	1	1	7.7334	0	0	NA	0	0	NA	0	0	NA	1	1	NA	0	0	NA	0	0	NA	0	0	NA	0	0	NA	0	0	NA	1.9552
sp|P08670|VIME_HUMAN;sp|P17661|DESM_HUMAN;sp|P41219|PERI_HUMAN;sp|P14136|GFAP_HUMAN	13	13	3.4311	11	11	0.53776	28	28	0.81587	30	29	0.93366	34	34	0.80976	30	30	0.7199	29	29	0.79939	30	30	0.7096	25	25	0.62699	24	24	0.76804	16	16	0.65971	16	15	10.997	14	14	2.1099	14	14	5.2827	323.31
sp|P08708|RS17_HUMAN;tr|H3BNC9|H3BNC9_HUMAN	0	0	NA	0	0	NA	0	0	NA	0	0	NA	0	0	NA	0	0	NA	0	0	NA	0	0	NA	0	0	NA	0	0	NA	0	0	NA	0	0	NA	1	1	3.1399	0	0	NA	12.884
sp|P08754|GNAI3_HUMAN;sp|P09471|GNAO_HUMAN;sp|P11488|GNAT1_HUMAN;sp|P19087|GNAT2_HUMAN;sp|A8MTJ3|GNAT3_HUMAN;sp|P38405|GNAL_HUMAN;sp|Q5JWF2|GNAS1_HUMAN	0	0	NA	0	0	NA	0	0	NA	0	0	NA	2	2	0.53095	5	5	0.53064	0	0	NA	0	0	NA	1	1	0.58397	0	0	NA	0	0	NA	0	0	NA	0	0	NA	0	0	NA	18.097
sp|P08758|ANXA5_HUMAN	0	0	NA	0	0	NA	0	0	NA	0	0	NA	0	0	NA	0	0	NA	0	0	NA	0	0	NA	0	0	NA	0	0	NA	0	0	NA	0	0	NA	0	0	NA	0	0	NA	95.432
sp|P08865|RSSA_HUMAN	0	0	NA	0	0	NA	2	2	0.79511	1	1	0.9352	7	7	0.98681	7	7	0.79539	7	7	1.4765	4	4	1.2268	4	4	0.90958	2	2	1.4996	6	6	0.92958	2	2	2.9344	5	5	3.6672	4	4	8.8798	217.25
sp|P09001|RM03_HUMAN	0	0	NA	0	0	NA	0	0	NA	0	0	NA	0	0	NA	0	0	NA	0	0	NA	0	0	NA	0	0	NA	0	0	NA	0	0	NA	0	0	NA	0	0	NA	0	0	NA	10.257
sp|P09012|SNRPA_HUMAN	0	0	NA	1	1	4.345	0	0	NA	0	0	NA	1	1	0.59483	0	0	NA	0	0	NA	0	0	NA	0	0	NA	0	0	NA	5	3	0.53993	4	2	NA	3	1	NA	4	2	5.6692	58.703
sp|P09211|GSTP1_HUMAN	0	0	NA	0	0	NA	0	0	NA	0	0	NA	2	2	0.9704	2	2	NA	1	1	1.6402	0	0	NA	2	2	0.67313	2	2	0.97877	0	0	NA	0	0	NA	0	0	NA	0	0	NA	10.27
sp|P09234|RU1C_HUMAN	0	0	NA	0	0	NA	0	0	NA	0	0	NA	0	0	NA	0	0	NA	0	0	NA	0	0	NA	0	0	NA	0	0	NA	1	1	1.4204	1	1	NA	1	1	2.4893	1	1	NA	10.276
sp|P09429|HMGB1_HUMAN;sp|B2RPK0|HGB1A_HUMAN	1	1	3.1837	0	0	NA	0	0	NA	0	0	NA	0	0	NA	0	0	NA	0	0	NA	0	0	NA	0	0	NA	0	0	NA	0	0	NA	0	0	NA	0	0	NA	0	0	NA	78.149
sp|P09496|CLCA_HUMAN	0	0	NA	0	0	NA	0	0	NA	0	0	NA	0	0	NA	0	0	NA	0	0	NA	0	0	NA	0	0	NA	0	0	NA	0	0	NA	0	0	NA	0	0	NA	0	0	NA	3.6586
sp|P09525|ANXA4_HUMAN	0	0	NA	0	0	NA	0	0	NA	0	0	NA	0	0	NA	0	0	NA	0	0	NA	0	0	NA	0	0	NA	0	0	NA	0	0	NA	0	0	NA	0	0	NA	0	0	NA	28.096
sp|P09622|DLDH_HUMAN	0	0	NA	0	0	NA	0	0	NA	0	0	NA	2	2	0.54424	2	2	0.53048	1	1	1.6875	1	1	1.8748	1	1	NA	0	0	NA	0	0	NA	0	0	NA	0	0	NA	0	0	NA	7.1997
sp|P09651|ROA1_HUMAN;sp|Q32P51|RA1L2_HUMAN	4	4	4.0763	1	1	2.6737	3	3	0.79208	0	0	NA	2	2	1.4328	3	3	1.3252	4	4	0.97166	3	3	1.0652	2	2	1.5221	2	2	1.1245	6	6	0.10134	4	4	2.2302	5	5	0.5102	7	7	1.4588	323.31
sp|P09661|RU2A_HUMAN	0	0	NA	0	0	NA	0	0	NA	0	0	NA	0	0	NA	0	0	NA	0	0	NA	0	0	NA	1	1	1.8583	0	0	NA	4	4	1.4504	4	4	6.4345	4	4	4.671	6	6	8.1068	171.16
sp|P09874|PARP1_HUMAN	20	20	0.54878	17	17	1.855	29	29	0.51571	33	33	0.70915	44	44	3.767	39	39	3.8413	36	36	4.6925	39	39	5.2251	35	35	3.6604	36	36	4.8738	7	7	0.31479	6	6	8.2663	6	6	1.265	5	5	4.1778	323.31
sp|P09960|LKHA4_HUMAN	0	0	NA	0	0	NA	0	0	NA	0	0	NA	4	4	0.87342	5	5	0.59583	1	1	NA	0	0	NA	3	3	0.81038	1	1	NA	0	0	NA	0	0	NA	0	0	NA	0	0	NA	79.69
sp|P09972|ALDOC_HUMAN	0	0	NA	0	0	NA	0	0	NA	0	0	NA	1	1	0.744	2	1	NA	1	1	0.98108	0	0	NA	1	1	NA	0	0	NA	0	0	NA	0	0	NA	0	0	NA	0	0	NA	9.9887
sp|Q71UI9|H2AV_HUMAN;sp|P0C0S5|H2AZ_HUMAN	2	0	NA	3	1	4.3724	4	2	0.65262	4	2	0.72415	3	1	2.3801	3	1	2.7345	4	2	1.2806	3	1	1.2754	4	2	1.9392	3	1	1.0509	4	2	0.76984	3	1	9.5923	4	2	1.9592	3	1	4.1022	39.613
sp|Q99878|H2A1J_HUMAN;sp|Q96KK5|H2A1H_HUMAN;sp|Q9BTM1|H2AJ_HUMAN;sp|P20671|H2A1D_HUMAN;sp|P0C0S8|H2A1_HUMAN;tr|A0A0U1RRH7|A0A0U1RRH7_HUMAN	4	4	0.48016	5	5	3.1129	4	4	0.69262	5	5	0.56169	5	5	2.6865	5	5	2.8581	5	5	1.3075	5	5	1.4285	4	4	2.2461	3	3	1.3142	5	5	0.56092	3	3	16.218	5	5	1.9581	4	4	4.8016	323.31
sp|P0CB38|PAB4L_HUMAN	2	0	NA	2	0	NA	2	0	NA	2	0	NA	2	0	NA	2	0	NA	2	0	NA	2	0	NA	2	0	NA	2	0	NA	1	0	NA	1	0	NA	1	0	NA	1	0	NA	3.0782
sp|P0CE72|ONCO_HUMAN;sp|P0CE71|OCM2_HUMAN	0	0	NA	0	0	NA	1	1	3.1146	1	1	0.32935	0	0	NA	0	0	NA	1	1	0.56649	0	0	NA	1	1	1.741	0	0	NA	0	0	NA	0	0	NA	0	0	NA	0	0	NA	2.7821
sp|P0CG06|LAC3_HUMAN;sp|P0CG05|LAC2_HUMAN;sp|P0CG04|LAC1_HUMAN;sp|P0CF74|LAC6_HUMAN;sp|A0M8Q6|LAC7_HUMAN;sp|B9A064|IGLL5_HUMAN	0	0	NA	0	0	NA	0	0	NA	0	0	NA	0	0	NA	0	0	NA	0	0	NA	0	0	NA	0	0	NA	0	0	NA	0	0	NA	0	0	NA	0	0	NA	0	0	NA	2.1089
sp|Q6RFH8|DUX4C_HUMAN;sp|P0CJ87|DU4L4_HUMAN;sp|Q9UBX2|DUX4_HUMAN;sp|P0CJ90|DU4L7_HUMAN;sp|P0CJ89|DU4L6_HUMAN;sp|P0CJ88|DU4L5_HUMAN;sp|P0CJ86|DU4L3_HUMAN;sp|P0CJ85|DU4L2_HUMAN	0	0	NA	0	0	NA	0	0	NA	0	0	NA	0	0	NA	0	0	NA	1	1	NA	0	0	NA	0	0	NA	0	0	NA	0	0	NA	0	0	NA	0	0	NA	0	0	NA	2.4158
sp|P0DMV9|HS71B_HUMAN;sp|P0DMV8|HS71A_HUMAN	27	26	0.12821	29	28	6.6849	25	24	0.51903	30	28	0.67133	37	32	0.1927	38	34	0.15901	38	35	0.32542	37	32	0.27734	28	26	0.17758	29	27	0.33014	18	17	0.57132	16	15	10.893	21	20	1.9185	18	17	5.9066	323.31
sp|Q01081|U2AF1_HUMAN;sp|P0DN76|U2AF5_HUMAN;tr|M0R2N4|M0R2N4_HUMAN	0	0	NA	0	0	NA	0	0	NA	0	0	NA	2	2	2.0864	2	2	1.6999	2	2	2.1728	2	2	2.0683	1	1	1.5086	2	2	1.8833	1	1	0.31433	1	1	NA	1	1	1.3734	1	1	6.1376	250.69
sp|P35520|CBS_HUMAN;sp|P0DN79|CBSL_HUMAN	0	0	NA	0	0	NA	0	0	NA	0	0	NA	1	1	0.65859	1	1	0.55384	0	0	NA	0	0	NA	1	1	0.57222	0	0	NA	0	0	NA	0	0	NA	0	0	NA	0	0	NA	9.3204
sp|P10155|RO60_HUMAN	0	0	NA	1	1	NA	0	0	NA	0	0	NA	3	3	0.96166	1	1	0.9206	2	2	0.51884	3	3	0.58585	2	2	0.37958	2	2	0.87434	0	0	NA	1	1	34.515	0	0	NA	0	0	NA	50.283
sp|P10412|H14_HUMAN	2	0	NA	0	0	NA	0	0	NA	0	0	NA	0	0	NA	0	0	NA	0	0	NA	0	0	NA	0	0	NA	1	0	NA	6	0	NA	3	0	NA	1	0	NA	2	0	NA	4.5152
sp|P10515|ODP2_HUMAN	0	0	NA	0	0	NA	0	0	NA	0	0	NA	1	1	0.38354	2	2	0.37045	0	0	NA	0	0	NA	1	1	NA	0	0	NA	0	0	NA	0	0	NA	0	0	NA	0	0	NA	19.307
sp|P10599|THIO_HUMAN	0	0	NA	0	0	NA	0	0	NA	1	1	0.56434	0	0	NA	0	0	NA	0	0	NA	0	0	NA	0	0	NA	0	0	NA	0	0	NA	0	0	NA	0	0	NA	0	0	NA	12.346
sp|P10619|PPGB_HUMAN	0	0	NA	0	0	NA	0	0	NA	0	0	NA	0	0	NA	0	0	NA	0	0	NA	0	0	NA	0	0	NA	0	0	NA	0	0	NA	0	0	NA	0	0	NA	0	0	NA	7.1552
sp|P10644|KAP0_HUMAN	0	0	NA	0	0	NA	0	0	NA	0	0	NA	3	3	0.42941	3	3	0.40865	2	2	0.36295	1	1	0.23153	1	1	NA	1	1	0.37034	0	0	NA	0	0	NA	0	0	NA	0	0	NA	14.598
sp|P10768|ESTD_HUMAN	0	0	NA	0	0	NA	0	0	NA	0	0	NA	1	1	0.80826	0	0	NA	0	0	NA	0	0	NA	0	0	NA	0	0	NA	0	0	NA	0	0	NA	0	0	NA	0	0	NA	61.515
sp|P10809|CH60_HUMAN	11	11	0.83368	12	12	4.3858	14	14	0.6343	17	17	0.83431	24	24	0.44809	21	21	0.39991	23	23	0.42046	20	20	0.33496	20	20	0.3611	18	18	0.3745	2	2	0.17166	6	6	4.2227	1	1	1.0389	4	4	2.1088	323.31
sp|P11021|GRP78_HUMAN	9	8	0.4994	9	8	3.2052	11	10	0.56536	8	7	0.71741	19	18	0.40774	21	20	0.38313	19	18	0.47892	20	18	0.38473	19	18	0.39641	16	15	0.46333	12	11	0.28906	10	9	4.2844	8	7	1.1944	8	7	3.2527	323.31
sp|P11142|HSP7C_HUMAN	27	27	0.1348	27	27	5.7766	28	28	0.55211	30	30	0.72351	38	38	0.23748	36	36	0.19641	32	32	0.27155	37	37	0.22419	30	30	0.22072	28	28	0.27535	25	25	0.60426	24	24	10.325	26	26	1.9526	21	21	5.9924	323.31
sp|P11177|ODPB_HUMAN	0	0	NA	0	0	NA	0	0	NA	0	0	NA	0	0	NA	0	0	NA	0	0	NA	0	0	NA	0	0	NA	0	0	NA	0	0	NA	0	0	NA	0	0	NA	0	0	NA	77.988
sp|P11310|ACADM_HUMAN	0	0	NA	0	0	NA	0	0	NA	0	0	NA	2	2	0.7423	2	2	0.64576	1	1	1.9137	1	1	1.3364	4	4	0.62147	1	1	1.4322	0	0	NA	0	0	NA	0	0	NA	0	0	NA	101.56
sp|P11387|TOP1_HUMAN;sp|Q969P6|TOP1M_HUMAN	4	4	0.20303	2	2	3.8181	1	1	0.45141	1	1	0.77923	5	5	5.5867	6	6	10.631	7	7	3.7869	5	5	4.6052	5	5	4.4626	5	5	4.3829	0	0	NA	0	0	NA	0	0	NA	0	0	NA	179.82
sp|P11388|TOP2A_HUMAN	0	0	NA	0	0	NA	0	0	NA	0	0	NA	13	13	0.715	12	12	0.73699	15	15	0.81218	12	12	0.71938	15	15	0.63704	13	13	0.84469	0	0	NA	0	0	NA	0	0	NA	0	0	NA	170.86
sp|P11413|G6PD_HUMAN	0	0	NA	0	0	NA	0	0	NA	0	0	NA	1	1	0.77205	0	0	NA	1	1	1.2808	0	0	NA	0	0	NA	0	0	NA	0	0	NA	0	0	NA	0	0	NA	0	0	NA	4.1962
sp|P11532|DMD_HUMAN	0	0	NA	1	1	NA	0	0	NA	0	0	NA	1	1	0.089519	1	1	0.064795	1	1	0.31881	0	0	NA	1	1	0.026459	1	1	0.017747	0	0	NA	0	0	NA	0	0	NA	0	0	NA	13.647
sp|P11586|C1TC_HUMAN	0	0	NA	0	0	NA	0	0	NA	0	0	NA	10	10	0.67783	12	12	0.59222	8	8	2.0428	8	8	1.5148	5	5	0.55547	3	3	1.8796	0	0	NA	0	0	NA	0	0	NA	0	0	NA	76.455
sp|P11766|ADHX_HUMAN	0	0	NA	0	0	NA	0	0	NA	0	0	NA	0	0	NA	0	0	NA	1	1	1.0894	0	0	NA	0	0	NA	0	0	NA	0	0	NA	0	0	NA	0	0	NA	0	0	NA	23.317
sp|P11802|CDK4_HUMAN	0	0	NA	0	0	NA	0	0	NA	0	0	NA	1	0	NA	1	0	NA	1	0	NA	1	0	NA	0	0	NA	0	0	NA	0	0	NA	0	0	NA	0	0	NA	0	0	NA	4.3116
sp|P11908|PRPS2_HUMAN	0	0	NA	0	0	NA	0	0	NA	0	0	NA	0	0	NA	0	0	NA	1	0	NA	0	0	NA	1	0	NA	0	0	NA	0	0	NA	0	0	NA	0	0	NA	0	0	NA	154.85
sp|P11940|PABP1_HUMAN	29	29	2.3117	32	32	0.27911	36	36	0.61728	39	39	0.72762	37	37	1.4953	40	40	1.467	40	40	0.57047	39	39	0.48995	35	35	1.4169	35	35	0.58014	30	30	2.4993	28	28	10.735	29	29	5.9515	28	28	8.2746	323.31
sp|P12004|PCNA_HUMAN	8	8	0.11018	9	9	4.2104	11	11	0.48789	11	11	0.73893	11	11	2.539	10	10	2.588	9	9	3.1651	10	10	3.2659	6	6	2.6424	7	7	2.9246	0	0	NA	1	1	0.95284	1	1	1.1934	1	1	0.60885	323.31
sp|P12035|K2C3_HUMAN;CON__P12035	3	0	NA	5	0	NA	4	0	NA	6	0	NA	4	0	NA	1	0	NA	5	1	NA	3	0	NA	4	0	NA	3	0	NA	6	1	NA	4	0	NA	5	0	NA	3	0	NA	6.9569	+
sp|P12235|ADT1_HUMAN	3	0	NA	3	0	NA	7	0	NA	6	0	NA	9	0	NA	10	0	NA	9	0	NA	7	0	NA	7	0	NA	5	0	NA	5	0	NA	4	0	NA	4	0	NA	3	0	NA	2.7575
sp|P12236|ADT3_HUMAN	4	1	0.33417	6	2	2.8147	10	1	0.50584	10	3	0.74838	13	4	0.61064	12	4	0.63759	12	3	0.96069	11	3	0.86043	9	2	0.53526	8	1	0.64911	7	0	NA	6	1	NA	6	0	NA	4	0	NA	56.774
sp|P12268|IMDH2_HUMAN;sp|P20839|IMDH1_HUMAN	0	0	NA	0	0	NA	0	0	NA	0	0	NA	9	9	0.90119	7	7	0.73717	6	6	1.9676	4	4	1.6137	4	4	0.64006	2	2	0.79976	0	0	NA	1	1	NA	0	0	NA	0	0	NA	94.843
sp|P12273|PIP_HUMAN	0	0	NA	0	0	NA	0	0	NA	0	0	NA	0	0	NA	0	0	NA	0	0	NA	0	0	NA	0	0	NA	0	0	NA	0	0	NA	0	0	NA	0	0	NA	0	0	NA	19.482
sp|P12277|KCRB_HUMAN	1	1	1.7734	0	0	NA	0	0	NA	0	0	NA	6	6	0.80957	8	8	0.71368	6	6	1.3837	4	4	1.6498	5	5	0.85983	4	4	2.1068	0	0	NA	0	0	NA	0	0	NA	0	0	NA	238.95
sp|P12429|ANXA3_HUMAN	0	0	NA	0	0	NA	0	0	NA	0	0	NA	0	0	NA	0	0	NA	0	0	NA	0	0	NA	0	0	NA	0	0	NA	0	0	NA	0	0	NA	0	0	NA	0	0	NA	3.6122
sp|P12814|ACTN1_HUMAN	0	0	NA	0	0	NA	0	0	NA	0	0	NA	4	0	NA	4	0	NA	2	0	NA	1	0	NA	5	0	NA	4	0	NA	1	0	NA	0	0	NA	0	0	NA	0	0	NA	174.29
sp|P12955|PEPD_HUMAN	0	0	NA	0	0	NA	0	0	NA	0	0	NA	0	0	NA	0	0	NA	1	1	0.47361	0	0	NA	1	1	0.46447	0	0	NA	0	0	NA	0	0	NA	0	0	NA	0	0	NA	2.2935
sp|P12956|XRCC6_HUMAN	6	6	0.23556	6	6	3.4872	12	12	0.44947	15	15	0.63127	17	17	1.6694	13	13	1.7342	13	13	2.4131	10	10	2.9915	11	11	1.4821	11	11	2.4028	3	3	0.64636	3	3	4.6018	2	2	2.1493	2	2	3.6405	323.31
sp|P13010|XRCC5_HUMAN	4	4	0.19212	7	7	3.1527	11	11	0.45552	9	9	0.63828	16	16	1.2826	18	18	1.3821	16	16	2.0713	10	10	2.0603	11	11	1.3398	8	8	2.2852	3	3	0.91859	2	2	9.7872	4	4	2.8094	2	2	3.9618	260.4
sp|P13489|RINI_HUMAN	0	0	NA	0	0	NA	0	0	NA	0	0	NA	1	1	NA	1	1	0.35234	1	1	NA	0	0	NA	1	1	0.54131	0	0	NA	0	0	NA	0	0	NA	0	0	NA	0	0	NA	7.5468
sp|P13533|MYH6_HUMAN	0	0	NA	0	0	NA	0	0	NA	0	0	NA	0	0	NA	0	0	NA	0	0	NA	0	0	NA	0	0	NA	0	0	NA	0	0	NA	0	0	NA	0	0	NA	0	0	NA	2.447
sp|P13535|MYH8_HUMAN	0	0	NA	0	0	NA	0	0	NA	0	0	NA	1	1	4.1603	1	1	4.0799	1	1	2.3299	1	1	2.5617	0	0	NA	0	0	NA	0	0	NA	0	0	NA	1	1	NA	0	0	NA	3.7569
sp|P13611|CSPG2_HUMAN	0	0	NA	1	1	NA	0	0	NA	0	0	NA	0	0	NA	0	0	NA	0	0	NA	0	0	NA	0	0	NA	0	0	NA	0	0	NA	1	1	0.90362	0	0	NA	0	0	NA	2.1828
sp|P13637|AT1A3_HUMAN	1	0	NA	0	0	NA	2	0	NA	2	0	NA	9	0	NA	12	0	NA	8	0	NA	9	0	NA	9	0	NA	9	0	NA	0	0	NA	0	0	NA	0	0	NA	0	0	NA	-2
sp|P13639|EF2_HUMAN	3	3	0.85174	5	5	2.7077	5	5	0.68013	5	5	0.88448	36	35	0.73997	33	32	0.71754	28	27	2.0282	25	24	1.7721	31	30	0.64972	25	24	1.742	6	5	0.4646	5	5	3.5382	4	4	1.8459	4	4	3.4684	323.31
sp|P13667|PDIA4_HUMAN	0	0	NA	0	0	NA	1	1	0.92647	0	0	NA	8	8	0.62874	8	8	0.54818	6	6	1.7837	4	4	2.2978	7	7	0.61335	1	1	2.9957	0	0	NA	0	0	NA	0	0	NA	0	0	NA	34.398
sp|P13674|P4HA1_HUMAN	0	0	NA	0	0	NA	0	0	NA	0	0	NA	0	0	NA	0	0	NA	0	0	NA	0	0	NA	3	3	0.43834	0	0	NA	0	0	NA	0	0	NA	0	0	NA	0	0	NA	4.6925
sp|P13796|PLSL_HUMAN	0	0	NA	0	0	NA	0	0	NA	0	0	NA	0	0	NA	1	0	NA	1	0	NA	1	0	NA	2	0	NA	0	0	NA	0	0	NA	0	0	NA	0	0	NA	0	0	NA	-2
sp|P13797|PLST_HUMAN	0	0	NA	0	0	NA	0	0	NA	1	1	1.5932	6	6	0.77676	5	5	0.72687	3	3	1.5643	2	2	2.2521	7	7	0.59476	2	2	1.3009	0	0	NA	0	0	NA	0	0	NA	0	0	NA	30.55
sp|P13804|ETFA_HUMAN	0	0	NA	0	0	NA	0	0	NA	0	0	NA	2	2	0.41324	2	2	0.38501	1	1	1.4704	0	0	NA	2	2	0.41356	1	1	1.0826	0	0	NA	0	0	NA	0	0	NA	0	0	NA	123.76
sp|P13984|T2FB_HUMAN	0	0	NA	0	0	NA	0	0	NA	0	0	NA	0	0	NA	0	0	NA	0	0	NA	0	0	NA	0	0	NA	0	0	NA	0	0	NA	0	0	NA	0	0	NA	0	0	NA	4.0167
sp|P14174|MIF_HUMAN	0	0	NA	0	0	NA	0	0	NA	0	0	NA	0	0	NA	0	0	NA	0	0	NA	0	0	NA	1	1	0.53433	1	1	0.76091	0	0	NA	0	0	NA	0	0	NA	0	0	NA	6.3467
sp|P14324|FPPS_HUMAN	0	0	NA	0	0	NA	0	0	NA	0	0	NA	0	0	NA	0	0	NA	0	0	NA	0	0	NA	0	0	NA	0	0	NA	0	0	NA	0	0	NA	0	0	NA	0	0	NA	14.573
sp|P14373|TRI27_HUMAN	0	0	NA	0	0	NA	0	0	NA	0	0	NA	0	0	NA	0	0	NA	0	0	NA	0	0	NA	0	0	NA	0	0	NA	0	0	NA	0	0	NA	0	0	NA	0	0	NA	2.7647
sp|P14550|AK1A1_HUMAN	0	0	NA	0	0	NA	0	0	NA	0	0	NA	0	0	NA	0	0	NA	0	0	NA	0	0	NA	0	0	NA	0	0	NA	0	0	NA	0	0	NA	0	0	NA	0	0	NA	25.313
sp|P14618|KPYM_HUMAN;sp|P30613|KPYR_HUMAN	1	1	0.9156	5	5	2.4135	1	1	0.70552	1	1	0.90067	22	22	0.67583	23	23	0.57598	19	19	2.275	15	15	2.0475	13	13	0.55031	12	12	2.0655	2	2	0.40902	3	3	1.439	2	2	1.7711	3	3	1.71	323.31
sp|P14625|ENPL_HUMAN;sp|Q58FF3|ENPLL_HUMAN	1	0	NA	1	0	NA	1	0	NA	2	1	1.2926	21	19	0.67311	17	15	0.63724	8	6	2.3351	8	6	1.6269	12	11	0.54427	5	4	1.6761	2	0	NA	1	1	NA	1	0	NA	1	0	NA	152.76
sp|P63162|RSMN_HUMAN;sp|P14678|RSMB_HUMAN	0	0	NA	0	0	NA	1	1	1.7621	2	2	0.36422	1	1	1.5304	2	2	1.3432	2	2	0.76936	3	3	0.8666	2	2	1.7119	1	1	0.88164	7	7	1.1149	8	8	20.071	7	7	4.0801	8	8	10.033	112.99
sp|P14735|IDE_HUMAN	0	0	NA	0	0	NA	0	0	NA	0	0	NA	1	1	1.1844	1	1	1.0479	1	1	1.0541	1	1	0.86994	0	0	NA	0	0	NA	0	0	NA	0	0	NA	0	0	NA	0	0	NA	1.9812
sp|P14866|HNRPL_HUMAN;tr|M0QYT0|M0QYT0_HUMAN	1	1	2.4125	0	0	NA	1	1	0.93745	2	2	0.66454	9	9	1.3849	5	5	1.1051	13	13	0.9053	6	6	0.93096	5	5	1.0607	6	6	0.96169	11	11	0.26198	13	13	10.814	11	11	0.98075	9	9	3.1579	323.31
sp|P14868|SYDC_HUMAN	0	0	NA	0	0	NA	0	0	NA	0	0	NA	9	9	0.69081	7	7	0.61391	5	5	1.2318	3	3	1.4193	6	6	0.55449	1	1	1.9499	0	0	NA	1	1	NA	0	0	NA	0	0	NA	88.682
sp|P14923|PLAK_HUMAN	1	1	NA	1	1	NA	0	0	NA	1	1	0.081189	0	0	NA	0	0	NA	0	0	NA	0	0	NA	6	6	0.24686	2	2	0.58764	5	5	0.39984	7	7	0.28609	0	0	NA	0	0	NA	81.828
sp|P15121|ALDR_HUMAN	0	0	NA	0	0	NA	0	0	NA	0	0	NA	3	3	0.85109	4	4	0.72601	1	1	NA	0	0	NA	1	1	0.72576	0	0	NA	0	0	NA	0	0	NA	0	0	NA	0	0	NA	42.421
sp|P15170|ERF3A_HUMAN;sp|Q8IYD1|ERF3B_HUMAN	1	1	0.80695	0	0	NA	0	0	NA	0	0	NA	1	1	1.2711	1	1	1.1965	2	2	1.4995	2	2	1.5778	1	1	1.4753	0	0	NA	0	0	NA	0	0	NA	0	0	NA	0	0	NA	14.812
sp|P15311|EZRI_HUMAN	0	0	NA	0	0	NA	0	0	NA	0	0	NA	5	0	NA	7	1	0.5147	2	0	NA	1	0	NA	2	0	NA	1	0	NA	0	0	NA	0	0	NA	0	0	NA	0	0	NA	2.2396
sp|P15531|NDKA_HUMAN;sp|P22392|NDKB_HUMAN;sp|O60361|NDK8_HUMAN	0	0	NA	0	0	NA	1	1	0.51902	0	0	NA	1	1	0.87175	0	0	NA	0	0	NA	0	0	NA	0	0	NA	0	0	NA	0	0	NA	0	0	NA	0	0	NA	0	0	NA	7.6889
sp|P15621|ZNF44_HUMAN	0	0	NA	0	0	NA	0	0	NA	0	0	NA	0	0	NA	0	0	NA	0	0	NA	0	0	NA	0	0	NA	0	0	NA	0	0	NA	0	0	NA	0	0	NA	0	0	NA	2.0331
sp|P15880|RS2_HUMAN	2	2	0.51234	2	2	2.2073	1	1	0.62205	2	2	0.60574	3	3	0.99518	5	5	0.82266	2	2	1.0797	3	3	0.94726	5	5	0.68285	3	3	0.98351	4	4	0.86066	3	3	7.4317	4	4	2.4825	4	4	5.1583	232.9
sp|P15924|DESP_HUMAN	0	0	NA	0	0	NA	2	2	0.23401	3	3	0.073074	0	0	NA	0	0	NA	1	1	NA	0	0	NA	7	7	0.30699	2	2	0.4752	6	6	0.34099	6	6	0.10056	0	0	NA	0	0	NA	210.18
sp|P15927|RFA2_HUMAN	0	0	NA	2	2	5.3283	1	1	0.60425	0	0	NA	1	1	0.66475	1	1	0.87217	1	1	NA	1	1	NA	1	1	NA	1	1	NA	0	0	NA	0	0	NA	0	0	NA	0	0	NA	45.738
sp|P16104|H2AX_HUMAN;sp|Q96QV6|H2A1A_HUMAN	2	0	NA	3	0	NA	2	0	NA	3	0	NA	3	0	NA	3	0	NA	3	0	NA	3	0	NA	2	0	NA	2	0	NA	3	0	NA	2	0	NA	3	0	NA	2	0	NA	37.933
sp|P16152|CBR1_HUMAN	0	0	NA	0	0	NA	0	0	NA	0	0	NA	1	1	NA	1	1	NA	0	0	NA	0	0	NA	0	0	NA	0	0	NA	0	0	NA	0	0	NA	0	0	NA	0	0	NA	133.28
sp|P16278|BGAL_HUMAN	0	0	NA	0	0	NA	0	0	NA	0	0	NA	0	0	NA	0	0	NA	0	0	NA	0	0	NA	0	0	NA	0	0	NA	0	0	NA	0	0	NA	0	0	NA	0	0	NA	12.876
sp|P16402|H13_HUMAN	2	0	NA	0	0	NA	0	0	NA	0	0	NA	0	0	NA	0	0	NA	0	0	NA	0	0	NA	0	0	NA	1	0	NA	6	0	NA	3	0	NA	1	0	NA	2	0	NA	3.8573
sp|P16403|H12_HUMAN;sp|Q02539|H11_HUMAN;sp|P22492|H1T_HUMAN;sp|P16401|H15_HUMAN	2	2	6.8593	0	0	NA	0	0	NA	0	0	NA	0	0	NA	0	0	NA	0	0	NA	0	0	NA	0	0	NA	1	1	NA	7	7	0.52634	3	3	2.1813	1	1	0.33686	2	2	0.58941	50.431
sp|P16435|NCPR_HUMAN	0	0	NA	0	0	NA	0	0	NA	0	0	NA	1	1	0.94751	0	0	NA	0	0	NA	1	1	3.3141	0	0	NA	0	0	NA	0	0	NA	0	0	NA	0	0	NA	0	0	NA	22.18
sp|P16615|AT2A2_HUMAN;sp|O14983|AT2A1_HUMAN;sp|Q93084|AT2A3_HUMAN	1	1	0.54525	1	1	3.2468	0	0	NA	0	0	NA	15	15	0.6755	12	12	0.6468	7	7	1.0934	8	8	0.88262	7	7	0.6262	4	4	0.90912	0	0	NA	0	0	NA	0	0	NA	0	0	NA	243.65
sp|P16989|YBOX3_HUMAN;sp|Q9Y2T7|YBOX2_HUMAN	5	2	0.3057	6	2	1.0621	5	0	NA	5	0	NA	13	8	1.4491	11	5	1.1725	17	11	0.44644	13	8	0.42516	9	4	1.0921	11	7	0.65441	9	5	0.10807	5	1	NA	8	3	0.47626	8	3	1.1036	323.31
sp|P17066|HSP76_HUMAN;sp|P48741|HSP77_HUMAN	8	1	0.1401	8	1	6.8787	9	1	0.56172	8	1	0.76992	11	2	0.22448	11	2	0.21171	10	1	0.31259	10	1	0.26487	8	1	0.20301	9	1	0.31389	8	1	0.5957	10	1	22.546	8	1	2.0514	8	1	6.4403	103.28
sp|P17612|KAPCA_HUMAN;sp|P22694|KAPCB_HUMAN	0	0	NA	0	0	NA	0	0	NA	0	0	NA	1	1	0.27102	1	1	0.31658	1	1	0.48718	1	1	0.48788	1	1	0.38858	0	0	NA	0	0	NA	0	0	NA	0	0	NA	0	0	NA	3.1039
sp|P17655|CAN2_HUMAN	0	0	NA	0	0	NA	0	0	NA	0	0	NA	3	3	0.85436	3	3	0.50585	0	0	NA	0	0	NA	0	0	NA	0	0	NA	0	0	NA	0	0	NA	0	0	NA	0	0	NA	6.7523
sp|P17812|PYRG1_HUMAN;sp|Q9NRF8|PYRG2_HUMAN	0	0	NA	0	0	NA	0	0	NA	0	0	NA	8	8	0.75475	7	7	0.60444	3	3	1.5775	2	2	2.325	5	5	0.49668	0	0	NA	0	0	NA	0	0	NA	0	0	NA	0	0	NA	61.223
sp|P17844|DDX5_HUMAN	1	0	NA	2	0	NA	5	1	0.69909	4	0	NA	11	5	0.97491	11	4	0.68053	10	4	1.0603	8	4	1.012	6	2	0.79424	3	1	2.7108	13	6	0.3602	8	5	7.6934	11	5	1.511	10	7	3.6421	74.918
sp|P17858|PFKAL_HUMAN	0	0	NA	0	0	NA	0	0	NA	0	0	NA	4	4	0.50221	4	4	0.50722	4	4	0.77511	2	2	0.51631	1	1	0.29264	1	1	0.33289	0	0	NA	0	0	NA	0	0	NA	0	0	NA	78.158
sp|P17980|PRS6A_HUMAN	0	0	NA	0	0	NA	0	0	NA	0	0	NA	5	5	0.57413	4	4	0.58476	2	2	1.1331	3	3	0.70802	3	3	0.64069	1	1	1.0371	0	0	NA	0	0	NA	0	0	NA	0	0	NA	22.978
sp|P17987|TCPA_HUMAN	2	2	0.58224	1	1	2.6896	3	3	0.41532	4	4	0.90554	15	15	0.54997	14	14	0.51482	10	10	1.0776	8	8	0.9624	12	12	0.47905	8	8	1.2248	0	0	NA	0	0	NA	0	0	NA	0	0	NA	200.06
sp|P18077|RL35A_HUMAN	0	0	NA	0	0	NA	1	1	0.58346	1	1	1.0316	1	1	NA	1	1	1.5078	5	5	0.69394	2	2	0.58189	2	2	0.96415	1	1	0.58758	2	2	0.90338	4	4	7.6984	2	2	2.9111	3	3	6.9546	75.358
sp|P18085|ARF4_HUMAN	0	0	NA	0	0	NA	0	0	NA	0	0	NA	0	0	NA	0	0	NA	0	0	NA	0	0	NA	0	0	NA	0	0	NA	0	0	NA	0	0	NA	0	0	NA	0	0	NA	-2
sp|P18124|RL7_HUMAN	4	4	0.67266	3	3	1.2772	9	9	0.50088	10	10	0.91212	10	10	2.1855	11	11	2.0763	13	13	0.57573	13	13	0.56568	10	10	1.9042	10	10	0.51529	13	13	0.67262	10	10	11.454	12	12	1.9034	10	10	4.2302	323.31
sp|P18583|SON_HUMAN	0	0	NA	0	0	NA	0	0	NA	0	0	NA	4	4	0.58964	4	4	0.56201	4	4	0.42579	5	5	0.51023	1	1	0.65623	3	3	0.5932	7	7	0.65593	6	6	8.6936	5	5	2.1602	6	6	7.5827	82.515
sp|P18621|RL17_HUMAN;tr|A0A0A6YYL6|A0A0A6YYL6_HUMAN	1	1	0.49157	1	1	1.7385	2	2	0.61719	2	2	0.78235	6	6	1.0169	5	5	0.80109	7	7	0.73435	4	4	0.64582	2	2	0.77243	3	3	0.6897	4	4	0.5721	2	2	8.2693	2	2	1.8649	2	2	4.771	117.69
sp|P18669|PGAM1_HUMAN;sp|P15259|PGAM2_HUMAN;sp|Q8N0Y7|PGAM4_HUMAN	0	0	NA	0	0	NA	0	0	NA	0	0	NA	1	1	0.69344	1	1	0.72919	0	0	NA	1	1	1.8795	0	0	NA	0	0	NA	0	0	NA	0	0	NA	0	0	NA	0	0	NA	5.3352
sp|P18754|RCC1_HUMAN	0	0	NA	0	0	NA	0	0	NA	0	0	NA	2	2	1.0695	2	2	1.1942	1	1	NA	1	1	NA	1	1	1.0634	0	0	NA	0	0	NA	0	0	NA	0	0	NA	0	0	NA	14.902
sp|P18858|DNLI1_HUMAN	0	0	NA	0	0	NA	0	0	NA	0	0	NA	1	1	3.3782	3	3	4.7888	0	0	NA	0	0	NA	1	1	NA	1	1	3.5602	0	0	NA	0	0	NA	0	0	NA	0	0	NA	47.252
sp|P18887|XRCC1_HUMAN	0	0	NA	0	0	NA	0	0	NA	0	0	NA	1	1	NA	0	0	NA	0	0	NA	1	1	NA	0	0	NA	0	0	NA	0	0	NA	0	0	NA	0	0	NA	0	0	NA	10.747
sp|P19338|NUCL_HUMAN	3	3	5.5176	0	0	NA	0	0	NA	0	0	NA	2	2	1.4071	2	2	1.281	3	3	0.75942	1	1	0.91287	2	2	1.4298	4	4	1.0325	5	5	0.24709	4	4	3.0713	0	0	NA	1	1	NA	222.9
sp|P19367|HXK1_HUMAN;sp|P52789|HXK2_HUMAN	0	0	NA	0	0	NA	0	0	NA	0	0	NA	2	2	0.6385	2	2	0.70303	1	1	1.6356	0	0	NA	1	1	6.9855	2	2	0.33973	0	0	NA	0	0	NA	0	0	NA	0	0	NA	8.7178
sp|P19387|RPB3_HUMAN	0	0	NA	0	0	NA	0	0	NA	0	0	NA	0	0	NA	0	0	NA	0	0	NA	0	0	NA	0	0	NA	0	0	NA	2	2	0.29928	5	5	7.8089	3	3	0.91963	4	4	3.6122	37.272
sp|P19388|RPAB1_HUMAN	0	0	NA	0	0	NA	0	0	NA	0	0	NA	0	0	NA	0	0	NA	0	0	NA	0	0	NA	0	0	NA	0	0	NA	2	2	0.67772	1	1	4.4659	2	2	1.4742	2	2	3.5958	74.32
sp|P19474|RO52_HUMAN	1	1	0.36777	0	0	NA	5	5	0.5551	3	3	0.70338	1	1	1.5008	0	0	NA	1	1	1.1452	0	0	NA	0	0	NA	0	0	NA	7	7	0.35212	6	6	5.9041	5	5	1.1743	5	5	4.331	31.977
sp|P19525|E2AK2_HUMAN	0	0	NA	0	0	NA	0	0	NA	0	0	NA	0	0	NA	0	0	NA	0	0	NA	0	0	NA	0	0	NA	0	0	NA	0	0	NA	0	0	NA	0	0	NA	0	0	NA	16.924
sp|P19623|SPEE_HUMAN	0	0	NA	0	0	NA	0	0	NA	0	0	NA	1	1	1.1352	0	0	NA	0	0	NA	1	1	2.3606	1	1	1.1386	0	0	NA	0	0	NA	0	0	NA	0	0	NA	0	0	NA	96.483
sp|P20042|IF2B_HUMAN	0	0	NA	0	0	NA	0	0	NA	0	0	NA	0	0	NA	0	0	NA	0	0	NA	0	0	NA	0	0	NA	0	0	NA	0	0	NA	0	0	NA	0	0	NA	0	0	NA	9.7498
sp|P20073|ANXA7_HUMAN	0	0	NA	0	0	NA	0	0	NA	0	0	NA	0	0	NA	0	0	NA	0	0	NA	0	0	NA	0	0	NA	0	0	NA	0	0	NA	0	0	NA	0	0	NA	0	0	NA	6.5579
sp|Q9NRW1|RAB6B_HUMAN;sp|P20340|RAB6A_HUMAN;sp|Q14964|RB39A_HUMAN	0	0	NA	0	0	NA	0	0	NA	0	0	NA	1	1	0.75004	1	1	0.64611	0	0	NA	0	0	NA	0	0	NA	1	1	0.93724	0	0	NA	0	0	NA	0	0	NA	0	0	NA	13.127
sp|P20585|MSH3_HUMAN	0	0	NA	0	0	NA	0	0	NA	0	0	NA	0	0	NA	0	0	NA	0	0	NA	0	0	NA	0	0	NA	0	0	NA	0	0	NA	0	0	NA	0	0	NA	0	0	NA	6.139
sp|P20618|PSB1_HUMAN	0	0	NA	0	0	NA	0	0	NA	0	0	NA	0	0	NA	0	0	NA	0	0	NA	0	0	NA	1	1	0.45914	0	0	NA	0	0	NA	0	0	NA	0	0	NA	0	0	NA	10.718
sp|P20700|LMNB1_HUMAN	2	2	0.70967	2	2	3.1138	4	4	0.68901	1	1	0.67528	16	16	0.4955	19	19	0.46403	17	17	0.39754	15	15	0.36838	8	8	0.4154	10	10	0.40457	0	0	NA	2	2	5.0725	1	1	1.2868	1	1	3.9409	225.45
sp|Q9UQ88|CD11A_HUMAN;sp|P21127|CD11B_HUMAN;sp|Q13882|PTK6_HUMAN	0	0	NA	0	0	NA	0	0	NA	0	0	NA	0	0	NA	0	0	NA	0	0	NA	0	0	NA	0	0	NA	0	0	NA	4	4	0.29331	3	3	4.1368	3	3	1.2031	2	2	7.3632	9.2213
sp|P21266|GSTM3_HUMAN	0	0	NA	0	0	NA	0	0	NA	0	0	NA	0	0	NA	0	0	NA	0	0	NA	0	0	NA	0	0	NA	0	0	NA	0	0	NA	0	0	NA	0	0	NA	0	0	NA	2.0899
sp|P21333|FLNA_HUMAN	0	0	NA	0	0	NA	0	0	NA	0	0	NA	13	13	0.65364	9	9	0.62503	8	8	0.95716	5	5	0.91672	9	8	0.68259	6	5	0.64967	0	0	NA	1	1	NA	0	0	NA	0	0	NA	223.57
sp|P21399|ACOC_HUMAN	0	0	NA	0	0	NA	0	0	NA	0	0	NA	1	1	0.43258	0	0	NA	0	0	NA	0	0	NA	1	1	0.46837	0	0	NA	0	0	NA	0	0	NA	0	0	NA	0	0	NA	2.1855
sp|P21580|TNAP3_HUMAN	0	0	NA	0	0	NA	0	0	NA	0	0	NA	0	0	NA	0	0	NA	0	0	NA	0	0	NA	1	1	0.75927	0	0	NA	0	0	NA	0	0	NA	0	0	NA	0	0	NA	-2
sp|P21796|VDAC1_HUMAN	1	1	1.3869	2	2	2.3202	4	4	0.74129	2	2	0.5996	7	7	0.64447	6	6	0.62308	2	2	1.6801	0	0	NA	3	3	0.5606	1	1	1.3184	0	0	NA	0	0	NA	0	0	NA	0	0	NA	133.34
sp|P21912|SDHB_HUMAN	0	0	NA	0	0	NA	0	0	NA	0	0	NA	0	0	NA	0	0	NA	0	0	NA	0	0	NA	0	0	NA	0	0	NA	0	0	NA	0	0	NA	0	0	NA	0	0	NA	8.5392
sp|P22087|FBRL_HUMAN	0	0	NA	1	1	6.1441	2	2	1.0118	2	2	0.6725	9	9	1.4782	6	6	1.1428	10	10	0.65059	7	7	0.55259	3	3	1.3348	4	4	0.68189	8	8	0.64742	5	5	1.7004	4	4	2.0833	3	3	4.8677	111.08
sp|P22102|PUR2_HUMAN	0	0	NA	0	0	NA	0	0	NA	0	0	NA	11	11	0.70515	10	10	0.66252	6	6	1.752	5	5	1.399	9	9	0.57278	4	4	1.5197	0	0	NA	0	0	NA	0	0	NA	0	0	NA	107.4
sp|P22234|PUR6_HUMAN	0	0	NA	0	0	NA	0	0	NA	0	0	NA	4	4	0.64927	6	6	0.68543	0	0	NA	0	0	NA	2	2	0.57573	0	0	NA	0	0	NA	0	0	NA	0	0	NA	0	0	NA	29.423
sp|P22314|UBA1_HUMAN	0	0	NA	1	1	0.90222	0	0	NA	0	0	NA	21	21	0.68206	22	22	0.60403	12	12	2.1968	12	12	1.8119	13	13	0.55732	8	8	2.2493	0	0	NA	0	0	NA	0	0	NA	0	0	NA	323.31
sp|P22626|ROA2_HUMAN	6	6	4.7756	1	1	1.8152	5	5	0.75758	6	6	0.7897	3	3	1.6359	4	4	1.4186	11	11	0.25179	11	11	0.23503	3	3	1.2309	6	6	0.34335	14	14	0.072948	9	9	9.8661	12	12	0.28626	13	13	0.98302	323.31
sp|P22695|QCR2_HUMAN	0	0	NA	0	0	NA	0	0	NA	0	0	NA	3	3	0.48422	2	2	0.53155	0	0	NA	0	0	NA	2	2	0.3861	1	1	1.1338	0	0	NA	0	0	NA	0	0	NA	0	0	NA	28.139
sp|P22735|TGM1_HUMAN	0	0	NA	0	0	NA	0	0	NA	0	0	NA	0	0	NA	0	0	NA	0	0	NA	0	0	NA	0	0	NA	0	0	NA	0	0	NA	0	0	NA	0	0	NA	0	0	NA	3.4973
sp|P23025|XPA_HUMAN	0	0	NA	0	0	NA	0	0	NA	0	0	NA	0	0	NA	0	0	NA	0	0	NA	0	0	NA	0	0	NA	0	0	NA	0	0	NA	0	0	NA	0	0	NA	0	0	NA	9.2051
sp|P23193|TCEA1_HUMAN;sp|Q15560|TCEA2_HUMAN	0	0	NA	0	0	NA	0	0	NA	0	0	NA	0	0	NA	0	0	NA	0	0	NA	0	0	NA	0	0	NA	0	0	NA	0	0	NA	0	0	NA	0	0	NA	0	0	NA	30.994
sp|P23246|SFPQ_HUMAN	3	3	5.0123	0	0	NA	0	0	NA	0	0	NA	1	1	1.161	1	1	0.89031	4	4	1.1027	2	2	1.4776	1	1	1.0717	1	1	0.78584	0	0	NA	1	1	NA	0	0	NA	0	0	NA	280.01
sp|P23284|PPIB_HUMAN	0	0	NA	0	0	NA	0	0	NA	0	0	NA	0	0	NA	0	0	NA	0	0	NA	0	0	NA	0	0	NA	0	0	NA	0	0	NA	0	0	NA	0	0	NA	0	0	NA	16.998
sp|P23368|MAOM_HUMAN	0	0	NA	0	0	NA	0	0	NA	0	0	NA	1	1	0.61698	1	1	0.39402	0	0	NA	0	0	NA	0	0	NA	0	0	NA	0	0	NA	0	0	NA	0	0	NA	0	0	NA	41.155
sp|P23381|SYWC_HUMAN	0	0	NA	0	0	NA	0	0	NA	0	0	NA	1	1	NA	1	1	0.59758	1	1	1.6861	0	0	NA	0	0	NA	0	0	NA	0	0	NA	0	0	NA	0	0	NA	0	0	NA	4.6409
sp|P23396|RS3_HUMAN	1	1	0.60631	4	4	2.4243	6	6	0.6929	5	5	1.0214	7	7	0.94257	9	9	0.79603	12	12	0.80983	7	7	0.90065	8	8	0.87582	10	10	0.7475	10	10	0.89804	6	6	16.398	6	6	2.8	5	5	4.7862	309.46
sp|P23497|SP100_HUMAN	0	0	NA	0	0	NA	0	0	NA	0	0	NA	0	0	NA	0	0	NA	0	0	NA	0	0	NA	0	0	NA	0	0	NA	0	0	NA	0	0	NA	0	0	NA	0	0	NA	-2
sp|P23526|SAHH_HUMAN	0	0	NA	0	0	NA	0	0	NA	0	0	NA	8	8	0.58429	7	7	0.47459	4	4	2.0751	1	1	1.7606	3	3	0.39444	0	0	NA	0	0	NA	0	0	NA	0	0	NA	0	0	NA	16.86
sp|P23528|COF1_HUMAN	0	0	NA	0	0	NA	0	0	NA	0	0	NA	2	2	0.77565	2	2	0.53781	1	1	1.5201	1	1	1.3199	1	1	0.55073	0	0	NA	0	0	NA	0	0	NA	0	0	NA	0	0	NA	22.444
sp|P23588|IF4B_HUMAN	0	0	NA	0	0	NA	0	0	NA	0	0	NA	0	0	NA	0	0	NA	0	0	NA	0	0	NA	0	0	NA	0	0	NA	4	4	0.22273	1	1	3.2048	3	3	0.39212	1	1	1.4143	323.31
sp|P23634|AT2B4_HUMAN	0	0	NA	0	0	NA	0	0	NA	0	0	NA	2	2	0.7617	1	1	0.39416	0	0	NA	1	1	1.1066	1	1	0.21446	0	0	NA	0	0	NA	0	0	NA	0	0	NA	0	0	NA	3.9997
sp|P23921|RIR1_HUMAN	0	0	NA	0	0	NA	0	0	NA	0	0	NA	2	2	0.48134	3	3	0.50351	0	0	NA	1	1	NA	1	1	NA	0	0	NA	0	0	NA	0	0	NA	0	0	NA	0	0	NA	22.592
sp|P24534|EF1B_HUMAN	0	0	NA	0	0	NA	0	0	NA	0	0	NA	0	0	NA	0	0	NA	0	0	NA	0	0	NA	0	0	NA	0	0	NA	0	0	NA	0	0	NA	0	0	NA	0	0	NA	96.246
sp|P24752|THIL_HUMAN	0	0	NA	0	0	NA	0	0	NA	0	0	NA	3	3	0.61776	2	2	0.43711	1	1	NA	1	1	NA	0	0	NA	0	0	NA	0	0	NA	0	0	NA	0	0	NA	0	0	NA	51.877
sp|P24928|RPB1_HUMAN	0	0	NA	0	0	NA	0	0	NA	0	0	NA	1	1	0.69588	0	0	NA	0	0	NA	0	0	NA	0	0	NA	0	0	NA	27	27	0.40224	33	33	9.6557	30	30	1.4974	31	31	6.0567	323.31
sp|P24941|CDK2_HUMAN;sp|P50750|CDK9_HUMAN;sp|Q96Q40|CDK15_HUMAN;sp|O94921|CDK14_HUMAN;sp|Q07002|CDK18_HUMAN;sp|Q00536|CDK16_HUMAN;sp|Q00537|CDK17_HUMAN;sp|Q9NYV4|CDK12_HUMAN;sp|Q14004|CDK13_HUMAN	0	0	NA	0	0	NA	0	0	NA	0	0	NA	1	0	NA	1	0	NA	1	0	NA	2	0	NA	0	0	NA	0	0	NA	0	0	NA	0	0	NA	0	0	NA	0	0	NA	12.715
sp|P25205|MCM3_HUMAN	0	0	NA	0	0	NA	1	1	15.899	0	0	NA	4	4	1.1556	2	2	1.1499	2	2	2.3445	1	1	1.9709	1	1	1.2827	1	1	2.2823	0	0	NA	0	0	NA	0	0	NA	0	0	NA	42.939
sp|P25311|ZA2G_HUMAN	0	0	NA	0	0	NA	0	0	NA	0	0	NA	0	0	NA	0	0	NA	0	0	NA	1	1	0.13716	0	0	NA	0	0	NA	0	0	NA	1	1	NA	0	0	NA	0	0	NA	7.5429
sp|P25325|THTM_HUMAN	0	0	NA	0	0	NA	0	0	NA	0	0	NA	0	0	NA	0	0	NA	0	0	NA	0	0	NA	0	0	NA	0	0	NA	0	0	NA	0	0	NA	0	0	NA	0	0	NA	14.564
sp|P25398|RS12_HUMAN	0	0	NA	0	0	NA	1	1	0.85664	0	0	NA	0	0	NA	0	0	NA	0	0	NA	0	0	NA	0	0	NA	0	0	NA	0	0	NA	0	0	NA	1	1	4.6857	0	0	NA	30.463
sp|P25705|ATPA_HUMAN	2	2	3.053	0	0	NA	0	0	NA	1	1	1.3192	13	13	0.64686	13	13	0.57734	7	7	1.5489	4	4	1.4132	10	10	0.49833	4	4	1.2783	0	0	NA	1	1	NA	0	0	NA	0	0	NA	227.7
sp|P25786|PSA1_HUMAN;tr|B4DEV8|B4DEV8_HUMAN	0	0	NA	0	0	NA	0	0	NA	0	0	NA	1	1	0.806	1	1	NA	0	0	NA	0	0	NA	0	0	NA	0	0	NA	0	0	NA	0	0	NA	0	0	NA	0	0	NA	35.763
sp|P25787|PSA2_HUMAN	0	0	NA	0	0	NA	0	0	NA	0	0	NA	1	1	0.4737	0	0	NA	0	0	NA	0	0	NA	0	0	NA	0	0	NA	0	0	NA	0	0	NA	0	0	NA	0	0	NA	9.6826
sp|P25788|PSA3_HUMAN	0	0	NA	0	0	NA	0	0	NA	0	0	NA	1	1	0.74408	1	1	0.69018	0	0	NA	1	1	1.5529	1	1	0.66999	0	0	NA	0	0	NA	0	0	NA	0	0	NA	0	0	NA	9.8339
sp|P25789|PSA4_HUMAN	0	0	NA	1	1	2.9055	0	0	NA	0	0	NA	1	1	0.73594	3	3	0.85718	0	0	NA	0	0	NA	2	2	0.63439	0	0	NA	0	0	NA	1	1	NA	1	1	NA	0	0	NA	34.778
sp|P26038|MOES_HUMAN;sp|P35241|RADI_HUMAN	0	0	NA	0	0	NA	0	0	NA	0	0	NA	5	5	0.59971	7	7	0.49594	2	2	2.184	1	1	2.4842	3	3	0.5106	1	1	2.1884	0	0	NA	0	0	NA	0	0	NA	0	0	NA	13.049
sp|P26196|DDX6_HUMAN	0	0	NA	0	0	NA	0	0	NA	0	0	NA	4	4	0.91987	2	2	0.83536	2	2	1.5007	1	1	1.3255	2	2	1.0993	0	0	NA	2	2	0.39607	1	1	NA	1	1	1.4598	1	1	2.6077	16.249
sp|P26368|U2AF2_HUMAN	0	0	NA	0	0	NA	0	0	NA	0	0	NA	0	0	NA	0	0	NA	0	0	NA	0	0	NA	0	0	NA	0	0	NA	2	2	0.37028	1	1	NA	2	2	1.1021	2	2	4.474	266.64
sp|P26373|RL13_HUMAN	0	0	NA	1	1	2.2677	4	4	0.72156	5	5	0.79606	7	7	1.8341	7	7	1.4323	7	7	0.6789	7	7	0.65533	5	5	1.4169	6	6	0.57215	8	8	0.6439	7	7	14.851	6	6	2.3643	7	7	6.5871	323.31
sp|P26583|HMGB2_HUMAN	1	0	NA	0	0	NA	0	0	NA	0	0	NA	0	0	NA	0	0	NA	0	0	NA	0	0	NA	0	0	NA	0	0	NA	0	0	NA	0	0	NA	0	0	NA	0	0	NA	17.353
sp|P26599|PTBP1_HUMAN;sp|O95758|PTBP3_HUMAN	2	2	2.2889	0	0	NA	3	3	0.66508	2	2	0.62088	4	4	1.1987	2	2	1.1909	4	4	1.3754	3	3	1.2316	1	1	1.431	3	3	1.0302	3	3	0.31924	5	5	4.4448	3	3	1.2479	2	2	2.119	260.07
sp|P26639|SYTC_HUMAN	0	0	NA	0	0	NA	1	1	NA	0	0	NA	13	13	0.81009	10	10	0.70635	8	8	2.1817	5	5	1.5541	4	4	1.6942	4	4	1.5379	0	0	NA	0	0	NA	0	0	NA	0	0	NA	70.175
sp|P26641|EF1G_HUMAN	3	3	0.8648	1	1	3.1214	1	1	0.63378	3	3	0.92547	12	12	0.76578	10	10	0.70256	9	9	1.4003	10	10	1.1907	6	6	0.67736	7	7	1.2621	1	1	0.36005	0	0	NA	0	0	NA	0	0	NA	118.14
sp|P27105|STOM_HUMAN	0	0	NA	0	0	NA	0	0	NA	0	0	NA	0	0	NA	0	0	NA	0	0	NA	0	0	NA	0	0	NA	0	0	NA	0	0	NA	0	0	NA	0	0	NA	0	0	NA	35.395
sp|P27348|1433T_HUMAN	1	0	NA	0	0	NA	1	0	NA	1	0	NA	2	1	0.77319	3	1	0.61129	2	1	1.1097	3	1	1.1066	4	2	2.6947	3	1	1.1484	1	0	NA	1	0	NA	1	0	NA	1	0	NA	43.701
sp|P27449|VATL_HUMAN	0	0	NA	0	0	NA	0	0	NA	0	0	NA	0	0	NA	0	0	NA	0	0	NA	0	0	NA	0	0	NA	0	0	NA	0	0	NA	0	0	NA	0	0	NA	0	0	NA	-2
sp|P27635|RL10_HUMAN;sp|Q96L21|RL10L_HUMAN	0	0	NA	0	0	NA	0	0	NA	4	4	0.67354	10	10	1.0818	7	7	1.0214	9	9	0.82909	9	9	0.71001	4	4	0.82224	4	4	0.59469	6	6	0.36448	6	6	71.835	6	6	1.1588	7	7	4.434	172.47
sp|P27694|RFA1_HUMAN	18	18	0.049009	16	16	7.1988	5	5	0.51591	6	6	0.58247	14	14	1.7608	14	14	1.6596	15	15	2.7312	12	12	3.2249	10	10	1.7844	11	11	2.6547	0	0	NA	1	1	NA	0	0	NA	1	1	NA	323.31
sp|P27695|APEX1_HUMAN	0	0	NA	0	0	NA	0	0	NA	0	0	NA	0	0	NA	0	0	NA	0	0	NA	0	0	NA	0	0	NA	0	0	NA	0	0	NA	0	0	NA	0	0	NA	0	0	NA	87.862
sp|P27708|PYR1_HUMAN;sp|P31327|CPSM_HUMAN	0	0	NA	1	1	2.1413	0	0	NA	1	1	0.71748	28	28	0.67322	23	23	0.595	17	17	1.07	17	17	0.91172	25	25	0.55635	14	14	1.1964	0	0	NA	0	0	NA	0	0	NA	0	0	NA	323.31
sp|P27797|CALR_HUMAN	0	0	NA	0	0	NA	0	0	NA	0	0	NA	6	6	0.58198	4	4	0.53348	1	1	1.1558	2	2	1.5151	1	1	NA	0	0	NA	0	0	NA	0	0	NA	0	0	NA	0	0	NA	20.546
sp|P27816|MAP4_HUMAN	0	0	NA	0	0	NA	0	0	NA	0	0	NA	0	0	NA	0	0	NA	0	0	NA	0	0	NA	0	0	NA	0	0	NA	0	0	NA	0	0	NA	0	0	NA	0	0	NA	16.207
sp|P27824|CALX_HUMAN	2	2	2.0121	2	2	3.4177	1	1	0.63481	2	2	0.87091	7	7	0.64781	6	6	0.60028	4	4	1.3762	2	2	1.855	4	4	0.54293	2	2	0.96243	0	0	NA	0	0	NA	0	0	NA	0	0	NA	32.268
sp|P28066|PSA5_HUMAN	0	0	NA	0	0	NA	0	0	NA	0	0	NA	0	0	NA	1	1	0.6684	1	1	1.5195	1	1	1.1391	1	1	0.55131	0	0	NA	0	0	NA	0	0	NA	0	0	NA	0	0	NA	6.5104
sp|P28070|PSB4_HUMAN	0	0	NA	0	0	NA	0	0	NA	0	0	NA	1	1	0.64458	1	1	0.56967	0	0	NA	0	0	NA	0	0	NA	0	0	NA	0	0	NA	0	0	NA	0	0	NA	0	0	NA	4.1363
sp|P28072|PSB6_HUMAN	0	0	NA	0	0	NA	0	0	NA	0	0	NA	2	2	0.91898	1	1	0.50164	0	0	NA	0	0	NA	0	0	NA	0	0	NA	0	0	NA	0	0	NA	0	0	NA	0	0	NA	5.34
sp|P28074|PSB5_HUMAN	0	0	NA	0	0	NA	0	0	NA	0	0	NA	2	2	0.75484	4	4	0.63689	1	1	NA	1	1	NA	1	1	0.64941	0	0	NA	0	0	NA	0	0	NA	0	0	NA	0	0	NA	17.324
sp|P28288|ABCD3_HUMAN	0	0	NA	0	0	NA	0	0	NA	0	0	NA	2	2	0.54455	1	1	0.63183	0	0	NA	0	0	NA	0	0	NA	0	0	NA	0	0	NA	0	0	NA	0	0	NA	0	0	NA	5.4026
sp|P28331|NDUS1_HUMAN	0	0	NA	0	0	NA	0	0	NA	0	0	NA	5	5	0.69673	4	4	0.53353	0	0	NA	0	0	NA	1	1	0.75242	0	0	NA	0	0	NA	0	0	NA	0	0	NA	0	0	NA	20.563
sp|P28336|NMBR_HUMAN	0	0	NA	0	0	NA	0	0	NA	0	0	NA	0	0	NA	0	0	NA	0	0	NA	0	0	NA	0	0	NA	0	0	NA	0	0	NA	0	0	NA	0	0	NA	0	0	NA	2.0876
sp|P28482|MK01_HUMAN	0	0	NA	0	0	NA	0	0	NA	0	0	NA	0	0	NA	0	0	NA	0	0	NA	0	0	NA	0	0	NA	0	0	NA	0	0	NA	0	0	NA	0	0	NA	0	0	NA	3.394
sp|P29144|TPP2_HUMAN	0	0	NA	0	0	NA	0	0	NA	0	0	NA	1	1	NA	1	1	0.60895	0	0	NA	0	0	NA	0	0	NA	0	0	NA	0	0	NA	0	0	NA	0	0	NA	0	0	NA	2.4365
sp|P29218|IMPA1_HUMAN	0	0	NA	0	0	NA	0	0	NA	0	0	NA	0	0	NA	0	0	NA	0	0	NA	0	0	NA	0	0	NA	0	0	NA	0	0	NA	0	0	NA	0	0	NA	0	0	NA	9.6199
sp|P29372|3MG_HUMAN	1	1	NA	0	0	NA	0	0	NA	0	0	NA	0	0	NA	0	0	NA	0	0	NA	0	0	NA	0	0	NA	0	0	NA	0	0	NA	0	0	NA	0	0	NA	0	0	NA	4.9669
sp|P29401|TKT_HUMAN	0	0	NA	0	0	NA	0	0	NA	0	0	NA	8	8	0.61376	11	11	0.55802	5	5	1.9092	5	5	2.4974	3	3	0.51645	3	3	2.4187	0	0	NA	0	0	NA	0	0	NA	0	0	NA	118.35
sp|P29475|NOS1_HUMAN	0	0	NA	0	0	NA	0	0	NA	0	0	NA	0	0	NA	0	0	NA	0	0	NA	0	0	NA	0	0	NA	0	0	NA	0	0	NA	0	0	NA	0	0	NA	0	0	NA	-2
sp|P29508|SPB3_HUMAN;sp|P48594|SPB4_HUMAN	0	0	NA	0	0	NA	0	0	NA	1	1	0.17302	0	0	NA	0	0	NA	0	0	NA	0	0	NA	0	0	NA	0	0	NA	0	0	NA	2	2	NA	0	0	NA	0	0	NA	29.657
sp|P29558|RBMS1_HUMAN;sp|Q6XE24|RBMS3_HUMAN	0	0	NA	0	0	NA	0	0	NA	0	0	NA	1	1	NA	0	0	NA	0	0	NA	0	0	NA	2	2	1.6792	2	2	1.2708	0	0	NA	0	0	NA	0	0	NA	0	0	NA	21.762
sp|P29692|EF1D_HUMAN	0	0	NA	0	0	NA	0	0	NA	0	0	NA	0	0	NA	0	0	NA	0	0	NA	0	0	NA	0	0	NA	0	0	NA	0	0	NA	0	0	NA	0	0	NA	0	0	NA	118.54
sp|P30041|PRDX6_HUMAN	0	0	NA	0	0	NA	0	0	NA	0	0	NA	5	5	0.72421	6	6	0.65348	3	3	1.6241	1	1	NA	3	3	0.7248	1	1	1.9943	1	1	0.27059	0	0	NA	0	0	NA	1	1	NA	65.221
sp|P30048|PRDX3_HUMAN	0	0	NA	0	0	NA	0	0	NA	1	1	1.1938	0	0	NA	1	1	0.51376	0	0	NA	0	0	NA	0	0	NA	0	0	NA	0	0	NA	1	1	NA	0	0	NA	0	0	NA	13.608
sp|P30050|RL12_HUMAN	4	4	0.42623	3	3	1.2919	4	4	4.1724	4	4	0.073564	4	4	2.2066	4	4	2.2228	6	6	0.51832	6	6	0.48642	5	5	1.7912	5	5	0.48575	5	5	0.86324	5	5	9.385	5	5	3.1504	5	5	7.1618	323.31
sp|P30086|PEBP1_HUMAN	0	0	NA	0	0	NA	0	0	NA	0	0	NA	0	0	NA	0	0	NA	0	0	NA	0	0	NA	0	0	NA	0	0	NA	0	0	NA	0	0	NA	0	0	NA	0	0	NA	2.9551
sp|P30101|PDIA3_HUMAN	0	0	NA	0	0	NA	0	0	NA	0	0	NA	5	5	0.7581	6	6	0.67423	3	3	1.3604	2	2	2.9292	1	1	0.65263	0	0	NA	0	0	NA	0	0	NA	0	0	NA	0	0	NA	14.57
sp|P30153|2AAA_HUMAN;sp|P30154|2AAB_HUMAN	2	2	0.35046	2	2	2.8558	3	3	0.60381	3	3	0.56414	2	2	0.757	2	2	0.73814	2	2	1.1553	1	1	0.53974	3	3	0.4451	3	3	1.0275	0	0	NA	1	1	NA	0	0	NA	0	0	NA	38.96
sp|P30414|NKTR_HUMAN	0	0	NA	0	0	NA	0	0	NA	0	0	NA	0	0	NA	0	0	NA	0	0	NA	0	0	NA	0	0	NA	0	0	NA	1	1	0.27113	2	2	NA	0	0	NA	2	2	2.0871	14.035
sp|P30519|HMOX2_HUMAN	0	0	NA	0	0	NA	0	0	NA	0	0	NA	0	0	NA	0	0	NA	0	0	NA	0	0	NA	0	0	NA	0	0	NA	0	0	NA	0	0	NA	0	0	NA	0	0	NA	100.48
sp|P30837|AL1B1_HUMAN	0	0	NA	0	0	NA	0	0	NA	0	0	NA	1	1	0.52552	1	1	0.42551	0	0	NA	0	0	NA	1	1	0.49092	1	1	1.2207	0	0	NA	0	0	NA	0	0	NA	0	0	NA	2.0922
sp|P30876|RPB2_HUMAN	0	0	NA	0	0	NA	0	0	NA	2	2	0.74585	3	3	0.9576	3	3	0.61098	3	3	0.81967	1	1	0.87934	1	1	NA	1	1	NA	34	34	0.43159	27	27	10.431	30	30	1.6529	26	26	4.6598	311.45
sp|P31025|LCN1_HUMAN;sp|Q5VSP4|LC1L1_HUMAN	0	0	NA	0	0	NA	0	0	NA	0	0	NA	0	0	NA	0	0	NA	0	0	NA	0	0	NA	0	0	NA	0	0	NA	0	0	NA	0	0	NA	0	0	NA	0	0	NA	77.823
sp|P31040|SDHA_HUMAN	0	0	NA	0	0	NA	0	0	NA	0	0	NA	5	5	0.67312	8	8	0.50778	1	1	0.99956	1	1	1.0915	2	2	0.47967	1	1	NA	0	0	NA	0	0	NA	0	0	NA	0	0	NA	73.224
sp|P31150|GDIA_HUMAN	0	0	NA	0	0	NA	0	0	NA	0	0	NA	3	3	0.67766	4	4	0.64045	2	2	2.5536	1	1	NA	2	2	NA	1	1	1.706	0	0	NA	0	0	NA	0	0	NA	0	0	NA	145.7
sp|P31151|S10A7_HUMAN	0	0	NA	0	0	NA	0	0	NA	0	0	NA	0	0	NA	0	0	NA	0	0	NA	0	0	NA	0	0	NA	0	0	NA	0	0	NA	0	0	NA	0	0	NA	0	0	NA	13.049
sp|P31483|TIA1_HUMAN	0	0	NA	0	0	NA	0	0	NA	0	0	NA	0	0	NA	0	0	NA	1	0	NA	0	0	NA	1	0	NA	0	0	NA	0	0	NA	1	0	NA	0	0	NA	0	0	NA	3.63
sp|P31689|DNJA1_HUMAN	4	4	0.14147	2	2	3.4452	5	5	0.45106	6	6	0.59542	10	10	0.46852	9	9	0.43741	9	9	0.53381	7	7	0.47295	5	5	0.39559	5	5	0.48859	2	2	0.58664	1	1	NA	2	2	2.3574	1	1	2.8933	120.12
sp|P31937|3HIDH_HUMAN	0	0	NA	0	0	NA	0	0	NA	0	0	NA	0	0	NA	0	0	NA	0	0	NA	0	0	NA	0	0	NA	0	0	NA	0	0	NA	0	0	NA	0	0	NA	0	0	NA	96.759
sp|P31939|PUR9_HUMAN	0	0	NA	0	0	NA	0	0	NA	0	0	NA	9	9	0.83329	7	7	0.76902	2	2	1.4096	1	1	NA	7	7	0.65083	3	3	2.2459	0	0	NA	0	0	NA	0	0	NA	0	0	NA	55.839
sp|P31942|HNRH3_HUMAN	1	1	2.1474	0	0	NA	1	1	0.87902	1	1	0.50817	4	3	2.4059	4	3	1.3966	4	3	0.54746	2	2	0.8315	2	2	1.8871	3	3	0.79219	5	4	0.086072	4	3	4.6384	6	5	0.17412	5	4	0.79278	294.96
sp|P31943|HNRH1_HUMAN	11	11	1.0941	8	8	0.9017	14	14	0.81457	13	13	0.55179	16	16	1.2897	16	16	1.1573	16	16	0.68148	14	14	0.56584	12	12	1.1202	13	13	0.66772	13	13	0.38222	15	15	20.882	12	12	1.2226	13	13	3.9032	323.31
sp|P31944|CASPE_HUMAN	0	0	NA	0	0	NA	0	0	NA	0	0	NA	0	0	NA	0	0	NA	0	0	NA	1	1	0.42258	0	0	NA	2	2	NA	0	0	NA	0	0	NA	0	0	NA	0	0	NA	15.037
sp|P31946|1433B_HUMAN	1	0	NA	0	0	NA	1	0	NA	1	0	NA	1	0	NA	2	0	NA	1	0	NA	2	0	NA	3	1	NA	2	0	NA	1	0	NA	1	0	NA	1	0	NA	1	0	NA	4.587
sp|P31947|1433S_HUMAN	1	0	NA	0	0	NA	1	0	NA	1	0	NA	1	0	NA	2	0	NA	1	0	NA	2	0	NA	2	0	NA	2	0	NA	1	0	NA	1	0	NA	1	0	NA	1	0	NA	5.8185
sp|P31948|STIP1_HUMAN	0	0	NA	0	0	NA	0	0	NA	0	0	NA	3	3	0.57315	3	3	0.64791	1	1	0.71993	0	0	NA	0	0	NA	0	0	NA	0	0	NA	0	0	NA	0	0	NA	0	0	NA	39.646
sp|P32119|PRDX2_HUMAN	0	0	NA	0	0	NA	1	0	NA	0	0	NA	0	0	NA	1	1	1.3607	0	0	NA	0	0	NA	3	2	0.53259	0	0	NA	0	0	NA	1	0	NA	1	0	NA	1	0	NA	7.2914
sp|P32322|P5CR1_HUMAN	0	0	NA	0	0	NA	0	0	NA	0	0	NA	0	0	NA	0	0	NA	0	0	NA	0	0	NA	0	0	NA	0	0	NA	0	0	NA	0	0	NA	0	0	NA	0	0	NA	164.44
sp|P32455|GBP1_HUMAN	1	1	0.1522	0	0	NA	1	1	0.099433	1	1	0.024112	1	1	0.26867	0	0	NA	1	1	NA	1	1	NA	0	0	NA	0	0	NA	0	0	NA	0	0	NA	0	0	NA	0	0	NA	40.255
sp|P32969|RL9_HUMAN	0	0	NA	0	0	NA	0	0	NA	0	0	NA	2	2	1.5512	0	0	NA	2	2	0.71779	0	0	NA	0	0	NA	1	1	0.75083	2	2	0.62096	2	2	7.9861	2	2	2.0849	1	1	5.2973	22.927
sp|P33240|CSTF2_HUMAN;sp|Q9H0L4|CSTFT_HUMAN	0	0	NA	0	0	NA	0	0	NA	0	0	NA	0	0	NA	0	0	NA	0	0	NA	0	0	NA	0	0	NA	0	0	NA	0	0	NA	0	0	NA	0	0	NA	0	0	NA	3.5315
sp|P33991|MCM4_HUMAN	0	0	NA	0	0	NA	0	0	NA	0	0	NA	3	3	1.0643	3	3	1.0155	2	2	1.5485	2	2	1.8022	1	1	0.78262	0	0	NA	0	0	NA	0	0	NA	0	0	NA	0	0	NA	19.722
sp|P33992|MCM5_HUMAN	0	0	NA	0	0	NA	0	0	NA	0	0	NA	0	0	NA	1	1	1.2671	0	0	NA	1	1	2.0786	1	1	1.0615	0	0	NA	0	0	NA	1	1	NA	0	0	NA	0	0	NA	11.505
sp|P33993|MCM7_HUMAN	0	0	NA	0	0	NA	0	0	NA	0	0	NA	3	3	1.1687	4	4	1.0765	5	5	1.3898	3	3	1.2996	3	3	1.3461	1	1	2.1358	0	0	NA	0	0	NA	0	0	NA	0	0	NA	13.246
sp|P34897|GLYM_HUMAN;sp|P34896|GLYC_HUMAN	0	0	NA	0	0	NA	0	0	NA	0	0	NA	2	2	0.53517	1	1	0.56277	0	0	NA	0	0	NA	0	0	NA	0	0	NA	0	0	NA	0	0	NA	0	0	NA	0	0	NA	7.1467
sp|P34931|HS71L_HUMAN	9	0	NA	10	0	NA	9	0	NA	11	0	NA	12	0	NA	11	0	NA	12	0	NA	12	0	NA	10	0	NA	10	0	NA	6	0	NA	6	0	NA	7	0	NA	6	0	NA	-2
sp|P34932|HSP74_HUMAN	0	0	NA	0	0	NA	0	0	NA	0	0	NA	11	11	0.66301	10	10	0.48547	7	7	2.132	6	6	1.9736	7	7	0.5694	6	6	2.0529	0	0	NA	0	0	NA	0	0	NA	0	0	NA	112.91
sp|P35080|PROF2_HUMAN	0	0	NA	0	0	NA	0	0	NA	0	0	NA	1	1	1.209	0	0	NA	0	0	NA	0	0	NA	0	0	NA	0	0	NA	0	0	NA	0	0	NA	0	0	NA	0	0	NA	4.5781
sp|P35219|CAH8_HUMAN	0	0	NA	0	0	NA	0	0	NA	0	0	NA	0	0	NA	0	0	NA	0	0	NA	0	0	NA	0	0	NA	0	0	NA	0	0	NA	0	0	NA	0	0	NA	0	0	NA	7.5133
sp|P35221|CTNA1_HUMAN;sp|P26232|CTNA2_HUMAN	0	0	NA	0	0	NA	0	0	NA	0	0	NA	0	0	NA	0	0	NA	0	0	NA	0	0	NA	0	0	NA	0	0	NA	0	0	NA	0	0	NA	0	0	NA	0	0	NA	13.674
sp|P35222|CTNB1_HUMAN	0	0	NA	0	0	NA	0	0	NA	0	0	NA	1	1	NA	2	2	0.57826	0	0	NA	1	1	0.6964	1	1	NA	0	0	NA	1	0	NA	0	0	NA	0	0	NA	0	0	NA	8.4103
sp|P35232|PHB_HUMAN	0	0	NA	0	0	NA	1	1	NA	0	0	NA	8	8	0.55464	9	9	0.44445	3	3	2.1436	2	2	1.2277	3	3	0.39805	1	1	NA	0	0	NA	0	0	NA	0	0	NA	0	0	NA	166.63
sp|P35244|RFA3_HUMAN	0	0	NA	0	0	NA	0	0	NA	1	1	NA	0	0	NA	0	0	NA	0	0	NA	0	0	NA	0	0	NA	0	0	NA	0	0	NA	0	0	NA	0	0	NA	0	0	NA	15.364
sp|P35249|RFC4_HUMAN	0	0	NA	0	0	NA	0	0	NA	0	0	NA	0	0	NA	0	0	NA	0	0	NA	0	0	NA	0	0	NA	0	0	NA	0	0	NA	0	0	NA	0	0	NA	0	0	NA	73.137
sp|P35250|RFC2_HUMAN	0	0	NA	0	0	NA	0	0	NA	0	0	NA	1	1	1.2357	0	0	NA	0	0	NA	0	0	NA	0	0	NA	0	0	NA	0	0	NA	0	0	NA	0	0	NA	0	0	NA	3.4367
sp|P35251|RFC1_HUMAN	0	0	NA	0	0	NA	0	0	NA	0	0	NA	3	3	1.3982	4	4	1.3088	6	6	1.9363	5	5	1.9741	2	2	1.3229	4	4	3.6927	0	0	NA	0	0	NA	0	0	NA	0	0	NA	151.25
sp|P35268|RL22_HUMAN	0	0	NA	0	0	NA	0	0	NA	0	0	NA	0	0	NA	0	0	NA	0	0	NA	0	0	NA	0	0	NA	0	0	NA	0	0	NA	0	0	NA	0	0	NA	0	0	NA	12.6
sp|P35527|K1C9_HUMAN;CON__P35527	21	21	0.042216	25	25	0.055209	25	24	0.048563	26	25	0.048177	20	20	0.055204	20	20	0.090996	17	17	0.081763	22	22	0.062978	23	23	0.04302	29	29	0.031762	18	17	0.027775	18	18	0.012205	18	17	0.025662	15	15	0.070351	323.31	+
sp|P35579|MYH9_HUMAN;sp|P11055|MYH3_HUMAN;sp|A7E2Y1|MYH7B_HUMAN	0	0	NA	0	0	NA	1	0	NA	2	1	0.9183	25	19	0.6288	22	15	0.54793	18	11	1.1538	15	11	0.92876	18	13	0.45432	10	7	0.85449	0	0	NA	0	0	NA	0	0	NA	0	0	NA	248.39
sp|P35580|MYH10_HUMAN	0	0	NA	0	0	NA	1	1	0.66411	1	1	0.88748	17	17	0.57736	16	16	0.54991	16	16	1.0497	12	12	0.75162	11	11	0.5357	7	7	0.88809	0	0	NA	0	0	NA	0	0	NA	0	0	NA	323.31
sp|P35606|COPB2_HUMAN	0	0	NA	0	0	NA	0	0	NA	0	0	NA	8	8	0.75708	8	8	0.68728	9	9	1.4879	6	6	1.36	8	8	0.68515	3	3	0.88549	0	0	NA	0	0	NA	0	0	NA	0	0	NA	92.969
sp|P35609|ACTN2_HUMAN	0	0	NA	0	0	NA	0	0	NA	0	0	NA	3	0	NA	4	1	0.75872	1	0	NA	2	1	1.6162	3	0	NA	1	0	NA	1	0	NA	0	0	NA	0	0	NA	0	0	NA	-2
sp|P35637|FUS_HUMAN	1	1	1.218	0	0	NA	0	0	NA	0	0	NA	0	0	NA	0	0	NA	0	0	NA	0	0	NA	0	0	NA	0	0	NA	1	1	NA	0	0	NA	0	0	NA	0	0	NA	53.988
sp|P35658|NU214_HUMAN	0	0	NA	0	0	NA	0	0	NA	0	0	NA	5	5	0.61716	4	4	0.54135	2	2	0.73347	2	2	0.61379	1	1	0.35752	1	1	NA	0	0	NA	0	0	NA	0	0	NA	0	0	NA	26.817
sp|P35908|K22E_HUMAN	25	25	0.064276	32	32	0.064488	22	22	0.029305	40	40	0.024599	35	35	0.057029	24	24	0.054316	29	29	0.074506	40	40	0.034442	29	29	0.030409	31	31	0.028429	23	23	0.027241	21	21	0.038942	20	20	0.034724	15	15	0.059271	323.31
sp|P35914|HMGCL_HUMAN;sp|Q8TB92|HMGC2_HUMAN	0	0	NA	0	0	NA	0	0	NA	0	0	NA	0	0	NA	0	0	NA	0	0	NA	0	0	NA	0	0	NA	0	0	NA	0	0	NA	0	0	NA	0	0	NA	0	0	NA	8.1932
sp|P35998|PRS7_HUMAN	0	0	NA	0	0	NA	0	0	NA	0	0	NA	6	6	0.68206	7	7	0.65436	5	5	1.1587	4	4	1.2996	5	5	0.5922	3	3	1.2414	0	0	NA	0	0	NA	0	0	NA	0	0	NA	26.929
sp|P36542|ATPG_HUMAN	0	0	NA	0	0	NA	1	1	0.60274	0	0	NA	3	3	0.53699	4	4	0.45037	3	3	0.82242	3	3	0.5729	3	3	0.5432	2	2	0.72299	0	0	NA	0	0	NA	0	0	NA	0	0	NA	46.871
sp|P36543|VATE1_HUMAN	0	0	NA	0	0	NA	0	0	NA	0	0	NA	0	0	NA	0	0	NA	0	0	NA	0	0	NA	0	0	NA	0	0	NA	0	0	NA	0	0	NA	0	0	NA	0	0	NA	15.332
sp|P36578|RL4_HUMAN	8	8	0.38305	6	6	3.0332	10	10	0.53076	9	9	0.91385	24	24	1.6455	24	24	1.5412	26	26	0.52564	26	26	0.52761	18	18	1.5479	20	20	0.51121	19	19	0.80726	17	17	9.9504	18	18	2.9262	15	15	5.5759	323.31
sp|P36873|PP1G_HUMAN	0	0	NA	0	0	NA	0	0	NA	1	0	NA	3	0	NA	2	1	NA	1	0	NA	0	0	NA	2	0	NA	2	0	NA	0	0	NA	1	0	NA	0	0	NA	0	0	NA	16.914
sp|P37108|SRP14_HUMAN	0	0	NA	0	0	NA	0	0	NA	0	0	NA	0	0	NA	0	0	NA	0	0	NA	0	0	NA	0	0	NA	0	0	NA	0	0	NA	0	0	NA	0	0	NA	0	0	NA	23.728
sp|P37837|TALDO_HUMAN	0	0	NA	0	0	NA	0	0	NA	0	0	NA	0	0	NA	0	0	NA	0	0	NA	0	0	NA	0	0	NA	0	0	NA	0	0	NA	0	0	NA	0	0	NA	0	0	NA	46.419
sp|P38117|ETFB_HUMAN	0	0	NA	0	0	NA	0	0	NA	0	0	NA	0	0	NA	0	0	NA	0	0	NA	0	0	NA	0	0	NA	0	0	NA	0	0	NA	0	0	NA	0	0	NA	0	0	NA	4.7651
sp|P38159|RBMX_HUMAN;sp|O75526|RMXL2_HUMAN;sp|Q8IZ40|RCOR2_HUMAN;sp|Q8N7X1|RMXL3_HUMAN	0	0	NA	1	1	2.0933	1	1	0.82687	1	1	0.40567	1	1	1.515	0	0	NA	1	1	0.72068	0	0	NA	1	1	NA	0	0	NA	15	15	0.056786	9	9	10.988	13	13	0.10696	10	10	0.23869	323.31
sp|P38606|VATA_HUMAN	0	0	NA	0	0	NA	0	0	NA	0	0	NA	3	3	0.8126	1	1	0.86899	2	2	1.6412	2	2	2.62	1	1	0.57436	0	0	NA	0	0	NA	0	0	NA	0	0	NA	0	0	NA	9.3785
sp|P38646|GRP75_HUMAN	2	2	0.84507	4	4	4.2389	4	4	0.70146	3	3	0.81812	22	22	0.32228	20	20	0.29364	20	20	0.38737	17	17	0.31235	15	15	0.32503	13	13	0.38582	8	8	0.097398	6	6	8.6037	7	7	0.16271	5	5	0.85087	323.31
sp|P38919|IF4A3_HUMAN	5	5	1.1013	7	7	0.51654	15	15	1.9946	21	21	0.16088	17	17	1.623	15	15	1.5863	15	15	0.75004	14	14	0.6973	12	12	1.4674	9	9	0.80277	25	25	0.9927	22	22	10.803	25	25	2.9705	25	25	6.8656	323.31
sp|P39019|RS19_HUMAN	0	0	NA	0	0	NA	0	0	NA	0	0	NA	1	1	NA	0	0	NA	1	1	0.58248	0	0	NA	0	0	NA	0	0	NA	3	3	0.82799	4	4	5.7371	1	1	4.18	5	5	6.0437	37.699
sp|P39023|RL3_HUMAN	4	4	0.46999	2	2	2.4123	6	6	0.63006	10	10	0.91358	15	15	2.1501	14	14	2.0588	18	18	0.55951	17	17	0.51608	12	12	1.8148	12	12	0.52153	12	12	0.83124	10	10	12.009	11	11	2.885	9	9	5.7921	323.31
sp|P39656|OST48_HUMAN	0	0	NA	1	1	NA	1	1	0.56473	0	0	NA	5	5	0.73544	4	4	0.71485	1	1	1.4793	1	1	2.0903	1	1	0.77895	0	0	NA	0	0	NA	0	0	NA	0	0	NA	0	0	NA	23.795
sp|P39687|AN32A_HUMAN;sp|O95626|AN32D_HUMAN	0	0	NA	0	0	NA	0	0	NA	0	0	NA	0	0	NA	0	0	NA	0	0	NA	0	0	NA	0	0	NA	0	0	NA	0	0	NA	0	0	NA	0	0	NA	0	0	NA	323.31
sp|P39748|FEN1_HUMAN	0	0	NA	0	0	NA	0	0	NA	0	0	NA	0	0	NA	0	0	NA	0	0	NA	0	0	NA	0	0	NA	0	0	NA	0	0	NA	0	0	NA	0	0	NA	0	0	NA	12.047
sp|P40227|TCPZ_HUMAN	0	0	NA	1	1	3.3174	2	2	0.60291	1	1	0.13877	12	12	0.58745	12	12	0.5293	5	5	1.3412	5	5	1.2025	6	6	0.50516	4	4	1.1887	0	0	NA	0	0	NA	0	0	NA	0	0	NA	212.27
sp|P40429|RL13A_HUMAN;sp|Q6NVV1|R13P3_HUMAN	1	1	0.56682	1	1	1.9886	5	5	0.55651	3	3	0.99915	7	7	1.8692	6	6	1.6614	8	8	0.58856	6	6	0.57862	3	3	1.6383	6	6	0.53017	7	7	0.77172	7	7	11.194	5	5	2.8738	5	5	5.5963	250.42
sp|P40616|ARL1_HUMAN	0	0	NA	0	0	NA	0	0	NA	0	0	NA	0	0	NA	0	0	NA	0	0	NA	0	0	NA	0	0	NA	1	1	4.0412	0	0	NA	0	0	NA	0	0	NA	0	0	NA	2.6147
sp|P40855|PEX19_HUMAN	0	0	NA	0	0	NA	0	0	NA	0	0	NA	0	0	NA	0	0	NA	0	0	NA	0	0	NA	0	0	NA	0	0	NA	0	0	NA	0	0	NA	0	0	NA	0	0	NA	43.884
sp|P40925|MDHC_HUMAN	0	0	NA	0	0	NA	0	0	NA	0	0	NA	4	4	0.75522	4	4	0.68823	1	1	NA	1	1	NA	1	1	0.4024	0	0	NA	0	0	NA	0	0	NA	0	0	NA	0	0	NA	111
sp|P40926|MDHM_HUMAN	3	3	3.1418	1	1	3.3208	0	0	NA	2	2	1.1851	10	10	0.58833	11	11	0.47834	7	7	2.17	6	6	2.2582	12	12	0.40392	6	6	1.4981	0	0	NA	0	0	NA	0	0	NA	0	0	NA	323.31
sp|P40937|RFC5_HUMAN	0	0	NA	0	0	NA	0	0	NA	0	0	NA	0	0	NA	0	0	NA	0	0	NA	0	0	NA	0	0	NA	0	0	NA	0	0	NA	0	0	NA	0	0	NA	0	0	NA	4.3876
sp|P40938|RFC3_HUMAN	0	0	NA	0	0	NA	0	0	NA	0	0	NA	2	2	0.95963	1	1	0.95748	1	1	0.93585	0	0	NA	0	0	NA	0	0	NA	0	0	NA	0	0	NA	0	0	NA	0	0	NA	21.418
sp|P40939|ECHA_HUMAN	0	0	NA	0	0	NA	0	0	NA	0	0	NA	17	17	0.43295	13	13	0.44221	10	10	0.87381	8	8	0.63462	8	8	0.36014	6	6	0.65936	0	0	NA	0	0	NA	0	0	NA	0	0	NA	202.99
sp|P41091|IF2G_HUMAN;sp|Q2VIR3|IF2GL_HUMAN;tr|F8W810|F8W810_HUMAN	0	0	NA	0	0	NA	0	0	NA	0	0	NA	2	2	0.73196	2	2	0.72301	0	0	NA	0	0	NA	1	1	1.2393	1	1	1.5351	0	0	NA	0	0	NA	0	0	NA	0	0	NA	38.802
sp|P41223|BUD31_HUMAN	0	0	NA	0	0	NA	0	0	NA	0	0	NA	0	0	NA	0	0	NA	0	0	NA	0	0	NA	0	0	NA	0	0	NA	3	3	1.0289	3	3	3.6583	2	2	3.11	1	1	2.8373	85.255
sp|P41227|NAA10_HUMAN;sp|Q9BSU3|NAA11_HUMAN	0	0	NA	0	0	NA	0	0	NA	0	0	NA	0	0	NA	0	0	NA	0	0	NA	0	0	NA	0	0	NA	0	0	NA	0	0	NA	0	0	NA	0	0	NA	0	0	NA	24.043
sp|Q6NXS1|IPP2M_HUMAN;sp|P41236|IPP2_HUMAN	0	0	NA	0	0	NA	0	0	NA	0	0	NA	0	0	NA	0	0	NA	0	0	NA	0	0	NA	0	0	NA	0	0	NA	0	0	NA	0	0	NA	0	0	NA	0	0	NA	9.7807
sp|P41250|SYG_HUMAN	0	0	NA	0	0	NA	0	0	NA	0	0	NA	5	5	1.0582	3	3	0.82343	2	2	2.1257	2	2	1.7644	3	3	0.74855	1	1	1.6696	0	0	NA	0	0	NA	0	0	NA	0	0	NA	22.432
sp|P41252|SYIC_HUMAN	0	0	NA	0	0	NA	2	2	0.64165	2	2	0.79201	26	26	0.67637	28	28	0.60207	21	21	0.99061	21	21	0.79927	21	21	0.53222	21	21	0.80484	0	0	NA	0	0	NA	0	0	NA	0	0	NA	323.31
sp|P42126|ECI1_HUMAN	0	0	NA	0	0	NA	0	0	NA	0	0	NA	0	0	NA	0	0	NA	0	0	NA	0	0	NA	0	0	NA	0	0	NA	0	0	NA	0	0	NA	0	0	NA	0	0	NA	2.8461
sp|P42166|LAP2A_HUMAN	0	0	NA	0	0	NA	1	1	0.55999	0	0	NA	6	6	1.4041	5	5	1.6198	6	6	2.6278	2	2	3.1248	2	2	1.2996	3	3	1.8171	0	0	NA	0	0	NA	0	0	NA	0	0	NA	99.46
sp|P42285|SK2L2_HUMAN	0	0	NA	0	0	NA	0	0	NA	0	0	NA	0	0	NA	2	2	0.64741	0	0	NA	0	0	NA	1	1	1.146	0	0	NA	0	0	NA	0	0	NA	0	0	NA	0	0	NA	9.065
sp|P42574|CASP3_HUMAN	0	0	NA	0	0	NA	0	0	NA	0	0	NA	0	0	NA	0	0	NA	0	0	NA	0	0	NA	0	0	NA	0	0	NA	0	0	NA	0	0	NA	0	0	NA	0	0	NA	7.4994
sp|P42677|RS27_HUMAN	0	0	NA	0	0	NA	1	1	0.37797	1	1	0.7939	2	2	0.54648	1	1	0.46535	2	2	0.72442	2	2	0.50795	2	2	0.59429	1	1	0.86028	1	1	NA	0	0	NA	0	0	NA	0	0	NA	39.115
sp|P42694|HELZ_HUMAN	1	1	0.96811	2	2	0.84918	1	1	0.57754	4	4	0.81969	23	23	1.7074	19	19	1.8929	24	24	1.1296	23	23	1.0161	14	14	1.7544	19	19	1.3357	1	1	NA	5	5	3.0536	1	1	NA	2	2	NA	294.99
sp|P42696|RBM34_HUMAN	0	0	NA	0	0	NA	0	0	NA	0	0	NA	2	2	1.4739	0	0	NA	4	4	0.42719	3	3	0.3996	0	0	NA	3	3	0.38352	1	1	0.50557	0	0	NA	0	0	NA	1	1	NA	44.523
sp|P42704|LPPRC_HUMAN;sp|Q9NP80|PLPL8_HUMAN	0	0	NA	0	0	NA	0	0	NA	0	0	NA	18	18	0.38646	19	19	0.38449	11	11	0.62814	9	9	0.4745	16	16	0.3786	10	10	0.59968	0	0	NA	0	0	NA	0	0	NA	0	0	NA	197.26
sp|P42766|RL35_HUMAN	0	0	NA	0	0	NA	0	0	NA	0	0	NA	0	0	NA	0	0	NA	0	0	NA	0	0	NA	0	0	NA	0	0	NA	0	0	NA	1	1	NA	0	0	NA	1	1	1.545	66.492
sp|P43034|LIS1_HUMAN	0	0	NA	0	0	NA	0	0	NA	0	0	NA	3	3	0.64661	3	3	0.76042	2	2	NA	0	0	NA	1	1	NA	0	0	NA	0	0	NA	0	0	NA	0	0	NA	0	0	NA	10.426
sp|P43243|MATR3_HUMAN	4	4	1.5694	4	4	0.94327	12	12	0.73056	14	14	0.59266	24	24	1.0135	21	21	0.98804	22	22	0.81218	18	18	0.69488	17	17	0.88187	19	19	0.72405	19	19	0.61934	14	14	7.2359	17	17	2.0667	15	15	5.8619	323.31
sp|P43246|MSH2_HUMAN	0	0	NA	0	0	NA	0	0	NA	0	0	NA	0	0	NA	0	0	NA	0	0	NA	1	1	2.1549	0	0	NA	0	0	NA	0	0	NA	0	0	NA	0	0	NA	0	0	NA	21.008
sp|P43307|SSRA_HUMAN	0	0	NA	0	0	NA	1	1	0.36941	0	0	NA	0	0	NA	0	0	NA	0	0	NA	0	0	NA	0	0	NA	0	0	NA	0	0	NA	0	0	NA	0	0	NA	0	0	NA	14.186
sp|P43686|PRS6B_HUMAN	0	0	NA	0	0	NA	0	0	NA	0	0	NA	1	1	0.77866	0	0	NA	0	0	NA	0	0	NA	1	1	0.80631	0	0	NA	0	0	NA	0	0	NA	0	0	NA	0	0	NA	5.7163
sp|P43897|EFTS_HUMAN	0	0	NA	0	0	NA	0	0	NA	0	0	NA	1	1	NA	1	1	NA	0	0	NA	0	0	NA	0	0	NA	0	0	NA	0	0	NA	0	0	NA	0	0	NA	0	0	NA	45.067
sp|P45880|VDAC2_HUMAN	2	2	0.71395	1	1	2.7787	5	5	0.67606	5	5	0.86128	9	9	0.65827	8	8	0.5513	6	6	1.7401	4	4	1.5518	4	4	0.53323	7	7	1.3003	0	0	NA	2	2	26.862	0	0	NA	0	0	NA	323.31
sp|P45973|CBX5_HUMAN	0	0	NA	0	0	NA	0	0	NA	0	0	NA	0	0	NA	0	0	NA	0	0	NA	0	0	NA	0	0	NA	0	0	NA	0	0	NA	0	0	NA	0	0	NA	0	0	NA	5.563
sp|P45974|UBP5_HUMAN	0	0	NA	0	0	NA	0	0	NA	0	0	NA	3	3	0.97932	1	1	0.75435	0	0	NA	0	0	NA	1	1	0.82986	1	1	1.6564	0	0	NA	0	0	NA	0	0	NA	0	0	NA	6.5969
sp|P46060|RAGP1_HUMAN	0	0	NA	0	0	NA	0	0	NA	0	0	NA	0	0	NA	0	0	NA	0	0	NA	0	0	NA	1	1	NA	0	0	NA	0	0	NA	0	0	NA	0	0	NA	0	0	NA	8.295
sp|P46063|RECQ1_HUMAN	0	0	NA	0	0	NA	0	0	NA	0	0	NA	0	0	NA	1	1	NA	0	0	NA	0	0	NA	0	0	NA	0	0	NA	0	0	NA	0	0	NA	0	0	NA	0	0	NA	2.4862
sp|P46087|NOP2_HUMAN	0	0	NA	1	1	2.9272	0	0	NA	0	0	NA	14	14	1.8782	9	9	1.5984	21	21	0.51493	14	14	0.50262	9	9	1.8234	15	15	0.55114	12	12	0.69065	9	9	3.1623	10	10	2.6757	7	7	5.6558	323.31
sp|P46109|CRKL_HUMAN	0	0	NA	0	0	NA	0	0	NA	0	0	NA	0	0	NA	0	0	NA	0	0	NA	0	0	NA	0	0	NA	0	0	NA	0	0	NA	0	0	NA	0	0	NA	0	0	NA	89.881
sp|P46199|IF2M_HUMAN	0	0	NA	0	0	NA	0	0	NA	0	0	NA	3	3	0.39937	5	5	0.4995	0	0	NA	1	1	0.38883	0	0	NA	0	0	NA	0	0	NA	0	0	NA	0	0	NA	0	0	NA	11.353
sp|P46459|NSF_HUMAN	0	0	NA	0	0	NA	0	0	NA	0	0	NA	1	1	1.1357	3	3	1.2416	1	1	2.5438	2	2	2.3353	6	6	0.86726	1	1	2.058	0	0	NA	0	0	NA	0	0	NA	0	0	NA	24.693
sp|P46736|BRCC3_HUMAN	0	0	NA	0	0	NA	0	0	NA	0	0	NA	1	1	NA	1	1	3.0227	0	0	NA	1	1	0.68231	0	0	NA	0	0	NA	0	0	NA	0	0	NA	0	0	NA	0	0	NA	8.558
sp|P46776|RL27A_HUMAN	0	0	NA	0	0	NA	4	4	0.58339	4	4	0.64186	4	4	1.2463	4	4	0.99631	4	4	0.65898	4	4	0.65934	5	5	0.91732	5	5	0.68949	5	5	0.21276	3	3	67.58	5	5	0.50206	3	3	1.1628	242.75
sp|P46777|RL5_HUMAN	5	5	0.25735	6	6	7.0782	2	2	0.52457	2	2	1.284	8	8	1.7551	7	7	1.4485	13	13	0.46483	9	9	0.5515	9	9	1.516	11	11	0.48733	10	10	0.81692	5	5	7.329	9	9	3.1602	6	6	7.5985	323.31
sp|P46778|RL21_HUMAN	1	1	0.52102	0	0	NA	1	1	0.6548	1	1	1.0138	2	2	1.5834	2	2	1.2684	4	4	0.58018	1	1	0.51364	1	1	1.3559	1	1	0.47403	3	3	0.8659	1	1	11.476	1	1	2.5283	1	1	6.6427	80.824
sp|P46779|RL28_HUMAN	1	1	0.37481	1	1	3.7304	1	1	0.85577	1	1	0.76457	5	5	1.5135	4	4	1.1324	7	7	0.6225	5	5	0.5817	2	2	1.1236	5	5	0.46753	2	2	0.60435	4	4	3.4774	4	4	1.29	2	2	1.4329	79.14
sp|P46781|RS9_HUMAN	0	0	NA	0	0	NA	2	2	0.57903	1	1	0.7865	10	10	1.0127	9	9	0.96237	11	11	0.59055	9	9	0.60113	8	8	1.0721	8	8	0.66255	11	11	0.31742	10	10	11.788	11	11	1.0397	9	9	2.3505	81.207
sp|P46782|RS5_HUMAN	0	0	NA	1	1	2.7902	0	0	NA	0	0	NA	2	2	1.321	1	1	1.3802	4	4	0.66831	1	1	0.74213	2	2	1.3752	3	3	0.59947	4	4	1.102	4	4	7.4843	3	3	4.3687	2	2	1.3309	233.08
sp|P46783|RS10_HUMAN;tr|S4R435|S4R435_HUMAN;sp|Q9NQ39|RS10L_HUMAN	1	1	0.7645	0	0	NA	0	0	NA	0	0	NA	1	1	1.1252	0	0	NA	2	2	0.54526	0	0	NA	1	1	0.98946	3	3	0.44774	2	2	0.98002	2	2	8.4932	2	2	2.0167	1	1	3.837	53.541
sp|P46821|MAP1B_HUMAN;sp|P78559|MAP1A_HUMAN	0	0	NA	0	0	NA	1	1	0.73776	0	0	NA	12	12	0.67384	15	15	0.42728	15	15	0.51167	16	16	0.49592	12	12	0.43016	13	13	0.46091	0	0	NA	0	0	NA	0	0	NA	0	0	NA	323.31
sp|P46926|GNPI1_HUMAN;sp|Q8TDQ7|GNPI2_HUMAN	0	0	NA	0	0	NA	0	0	NA	0	0	NA	0	0	NA	0	0	NA	0	0	NA	0	0	NA	0	0	NA	0	0	NA	0	0	NA	0	0	NA	0	0	NA	0	0	NA	16.658
sp|P46940|IQGA1_HUMAN	0	0	NA	0	0	NA	0	0	NA	0	0	NA	3	3	0.55294	2	2	0.50703	0	0	NA	0	0	NA	4	4	0.58278	2	2	0.90129	0	0	NA	0	0	NA	0	0	NA	0	0	NA	16.211
sp|P46977|STT3A_HUMAN	0	0	NA	0	0	NA	0	0	NA	0	0	NA	2	2	0.69626	0	0	NA	1	1	NA	0	0	NA	2	2	0.68518	1	1	1.0544	0	0	NA	0	0	NA	0	0	NA	0	0	NA	7.7319
sp|P47755|CAZA2_HUMAN	0	0	NA	0	0	NA	1	0	NA	0	0	NA	0	0	NA	0	0	NA	0	0	NA	0	0	NA	0	0	NA	0	0	NA	0	0	NA	1	0	NA	0	0	NA	1	0	NA	81.679
sp|P47756|CAPZB_HUMAN	0	0	NA	0	0	NA	0	0	NA	0	0	NA	1	1	NA	0	0	NA	0	0	NA	0	0	NA	0	0	NA	0	0	NA	0	0	NA	0	0	NA	0	0	NA	0	0	NA	29.8
sp|P47893|OR3A2_HUMAN;sp|P47888|OR3A3_HUMAN	0	0	NA	0	0	NA	0	0	NA	0	0	NA	0	0	NA	0	0	NA	0	0	NA	0	0	NA	0	0	NA	0	0	NA	0	0	NA	0	0	NA	0	0	NA	0	0	NA	-2
sp|P47897|SYQ_HUMAN	0	0	NA	0	0	NA	0	0	NA	1	1	0.019893	0	0	NA	3	3	1.5761	0	0	NA	0	0	NA	2	2	0.31915	0	0	NA	0	0	NA	0	0	NA	0	0	NA	0	0	NA	5.893
sp|P47914|RL29_HUMAN	0	0	NA	0	0	NA	1	1	0.87403	1	1	0.76924	2	2	1.8662	2	2	4.2013	2	2	0.45146	2	2	1.1981	2	2	1.802	2	2	0.45954	1	1	0.5193	1	1	NA	1	1	1.3596	1	1	2.8421	76.402
sp|P47929|LEG7_HUMAN	0	0	NA	0	0	NA	0	0	NA	0	0	NA	0	0	NA	0	0	NA	0	0	NA	0	0	NA	0	0	NA	0	0	NA	0	0	NA	0	0	NA	0	0	NA	0	0	NA	6.8376
sp|P48047|ATPO_HUMAN;tr|H7C0C1|H7C0C1_HUMAN	0	0	NA	0	0	NA	0	0	NA	0	0	NA	0	0	NA	0	0	NA	0	0	NA	0	0	NA	0	0	NA	0	0	NA	0	0	NA	0	0	NA	0	0	NA	0	0	NA	6.633
sp|P48147|PPCE_HUMAN	0	0	NA	0	0	NA	0	0	NA	0	0	NA	1	1	0.45809	2	2	0.3715	0	0	NA	0	0	NA	0	0	NA	0	0	NA	0	0	NA	0	0	NA	0	0	NA	0	0	NA	4.8755
sp|P48200|IREB2_HUMAN	0	0	NA	0	0	NA	0	0	NA	0	0	NA	0	0	NA	0	0	NA	0	0	NA	0	0	NA	0	0	NA	0	0	NA	0	0	NA	0	0	NA	0	0	NA	0	0	NA	2.4879
sp|P48444|COPD_HUMAN	0	0	NA	0	0	NA	0	0	NA	0	0	NA	4	4	0.72678	4	4	0.8831	2	2	1.4746	2	2	1.6824	2	2	0.63307	1	1	1.1082	0	0	NA	0	0	NA	0	0	NA	0	0	NA	14.879
sp|P48507|GSH0_HUMAN	0	0	NA	0	0	NA	0	0	NA	0	0	NA	0	0	NA	0	0	NA	0	0	NA	0	0	NA	0	0	NA	0	0	NA	0	0	NA	0	0	NA	0	0	NA	0	0	NA	4.3113
sp|P48556|PSMD8_HUMAN	0	0	NA	0	0	NA	0	0	NA	0	0	NA	0	0	NA	0	0	NA	0	0	NA	0	0	NA	0	0	NA	0	0	NA	0	0	NA	0	0	NA	0	0	NA	0	0	NA	11.721
sp|P48634|PRC2A_HUMAN	0	0	NA	0	0	NA	0	0	NA	0	0	NA	0	0	NA	0	0	NA	0	0	NA	0	0	NA	0	0	NA	0	0	NA	0	0	NA	0	0	NA	0	0	NA	0	0	NA	22.306
sp|P48643|TCPE_HUMAN	1	1	0.431	1	1	3.0498	1	1	1.183	1	1	1.3619	17	17	0.51093	19	19	0.46637	9	9	1.3682	8	8	1.0971	12	12	0.44232	6	6	1.3552	0	0	NA	0	0	NA	0	0	NA	0	0	NA	127.74
sp|P48681|NEST_HUMAN	0	0	NA	0	0	NA	0	0	NA	0	0	NA	0	0	NA	0	0	NA	0	0	NA	0	0	NA	0	0	NA	0	0	NA	0	0	NA	0	0	NA	0	0	NA	0	0	NA	14.556
sp|P48729|KC1A_HUMAN;sp|Q8N752|KC1AL_HUMAN	0	0	NA	0	0	NA	0	0	NA	0	0	NA	0	0	NA	0	0	NA	0	0	NA	0	0	NA	0	0	NA	0	0	NA	0	0	NA	0	0	NA	0	0	NA	0	0	NA	9.5307
sp|P48739|PIPNB_HUMAN	0	0	NA	0	0	NA	0	0	NA	0	0	NA	0	0	NA	0	0	NA	0	0	NA	0	0	NA	0	0	NA	0	0	NA	0	0	NA	0	0	NA	0	0	NA	0	0	NA	58.929
sp|P49006|MRP_HUMAN	0	0	NA	0	0	NA	0	0	NA	0	0	NA	0	0	NA	0	0	NA	0	0	NA	0	0	NA	0	0	NA	0	0	NA	0	0	NA	0	0	NA	0	0	NA	0	0	NA	7.2877
sp|P49189|AL9A1_HUMAN	0	0	NA	0	0	NA	0	0	NA	0	0	NA	1	1	NA	3	3	1.8352	0	0	NA	0	0	NA	0	0	NA	0	0	NA	0	0	NA	0	0	NA	0	0	NA	0	0	NA	2.8272
sp|P49207|RL34_HUMAN	0	0	NA	0	0	NA	0	0	NA	0	0	NA	1	1	1.6781	0	0	NA	3	3	0.60998	1	1	0.56088	1	1	1.5871	1	1	0.59518	2	2	0.92265	2	2	8.4421	2	2	2.5866	2	2	5.1221	96.608
sp|P49247|RPIA_HUMAN	0	0	NA	0	0	NA	0	0	NA	0	0	NA	0	0	NA	0	0	NA	0	0	NA	0	0	NA	0	0	NA	0	0	NA	0	0	NA	0	0	NA	0	0	NA	0	0	NA	-2
sp|P49257|LMAN1_HUMAN	0	0	NA	0	0	NA	0	0	NA	0	0	NA	1	1	NA	2	2	0.42028	0	0	NA	0	0	NA	0	0	NA	0	0	NA	0	0	NA	0	0	NA	0	0	NA	0	0	NA	3.4613
sp|P49327|FAS_HUMAN	0	0	NA	0	0	NA	1	1	0.59308	1	1	0.78432	37	37	0.67273	43	43	0.64035	29	29	1.2444	32	32	1.0246	40	40	0.58512	23	23	1.0264	0	0	NA	0	0	NA	0	0	NA	0	0	NA	323.31
sp|P49368|TCPG_HUMAN	1	1	0.91866	1	1	NA	1	1	0.88872	0	0	NA	11	11	0.56208	8	8	0.50646	6	6	0.9814	5	5	1.2101	11	11	0.4721	4	4	1.773	0	0	NA	1	1	NA	0	0	NA	0	0	NA	107.93
sp|P49406|RM19_HUMAN	0	0	NA	0	0	NA	0	0	NA	0	0	NA	0	0	NA	0	0	NA	0	0	NA	0	0	NA	0	0	NA	0	0	NA	0	0	NA	0	0	NA	0	0	NA	0	0	NA	15.245
sp|P49411|EFTU_HUMAN	0	0	NA	0	0	NA	0	0	NA	0	0	NA	8	8	0.44823	9	9	0.38323	4	4	1.1637	4	4	0.80388	5	5	0.37073	2	2	0.84476	0	0	NA	0	0	NA	0	0	NA	0	0	NA	97.719
sp|P49458|SRP09_HUMAN	0	0	NA	0	0	NA	0	0	NA	0	0	NA	0	0	NA	0	0	NA	0	0	NA	0	0	NA	0	0	NA	0	0	NA	0	0	NA	0	0	NA	0	0	NA	0	0	NA	11.58
sp|P49588|SYAC_HUMAN	0	0	NA	0	0	NA	0	0	NA	0	0	NA	11	11	0.67735	11	11	0.66288	2	2	2.4029	4	4	1.6364	6	6	0.51386	0	0	NA	0	0	NA	0	0	NA	0	0	NA	0	0	NA	50.604
sp|P49591|SYSC_HUMAN	0	0	NA	0	0	NA	0	0	NA	0	0	NA	5	5	0.99016	3	3	0.95369	1	1	3.2194	1	1	2.2485	0	0	NA	0	0	NA	0	0	NA	0	0	NA	0	0	NA	0	0	NA	33.146
sp|P49720|PSB3_HUMAN	0	0	NA	0	0	NA	0	0	NA	0	0	NA	1	1	0.38696	0	0	NA	1	1	1.5346	0	0	NA	1	1	NA	0	0	NA	0	0	NA	0	0	NA	0	0	NA	0	0	NA	8.1011
sp|P49721|PSB2_HUMAN	0	0	NA	0	0	NA	0	0	NA	0	0	NA	1	1	0.68303	1	1	0.47867	0	0	NA	0	0	NA	1	1	0.55617	1	1	1.3103	0	0	NA	0	0	NA	0	0	NA	0	0	NA	4.4071
sp|P49736|MCM2_HUMAN	0	0	NA	0	0	NA	0	0	NA	0	0	NA	3	3	0.7547	1	1	1.224	3	3	1.5937	3	3	0.93568	2	2	1.0836	3	3	1.4366	0	0	NA	0	0	NA	0	0	NA	0	0	NA	21.499
sp|P49750|YLPM1_HUMAN	0	0	NA	0	0	NA	0	0	NA	0	0	NA	0	0	NA	0	0	NA	0	0	NA	0	0	NA	0	0	NA	0	0	NA	0	0	NA	0	0	NA	0	0	NA	0	0	NA	7.12
sp|P49756|RBM25_HUMAN	0	0	NA	0	0	NA	0	0	NA	0	0	NA	0	0	NA	0	0	NA	0	0	NA	0	0	NA	0	0	NA	0	0	NA	0	0	NA	0	0	NA	0	0	NA	0	0	NA	61.742
sp|P49759|CLK1_HUMAN	0	0	NA	0	0	NA	0	0	NA	0	0	NA	0	0	NA	0	0	NA	1	0	NA	0	0	NA	0	0	NA	0	0	NA	10	7	0.10059	8	6	9.9149	9	7	0.25323	7	5	0.76302	100.39
sp|P49760|CLK2_HUMAN	0	0	NA	0	0	NA	0	0	NA	0	0	NA	0	0	NA	0	0	NA	1	1	NA	0	0	NA	0	0	NA	0	0	NA	7	6	0.13368	6	6	8.4784	6	6	0.47766	5	5	2.1981	40.507
sp|P49761|CLK3_HUMAN	0	0	NA	0	0	NA	0	0	NA	0	0	NA	0	0	NA	0	0	NA	1	1	0.66869	0	0	NA	0	0	NA	0	0	NA	2	2	0.19007	4	4	2.0545	4	4	0.75348	3	3	2.1629	19.65
sp|P49792|RBP2_HUMAN	0	0	NA	0	0	NA	0	0	NA	0	0	NA	7	7	0.76357	4	4	0.42746	4	4	0.56557	4	4	1.3829	3	3	0.54717	3	3	0.40136	0	0	NA	0	0	NA	0	0	NA	0	0	NA	45.195
sp|P49916|DNLI3_HUMAN	0	0	NA	0	0	NA	0	0	NA	0	0	NA	0	0	NA	2	2	2.4735	2	2	2.4833	2	2	2.4868	1	1	NA	1	1	13.951	0	0	NA	0	0	NA	0	0	NA	0	0	NA	18.135
sp|P49959|MRE11_HUMAN	0	0	NA	0	0	NA	0	0	NA	0	0	NA	1	1	2.3453	0	0	NA	0	0	NA	0	0	NA	1	1	NA	0	0	NA	0	0	NA	0	0	NA	0	0	NA	0	0	NA	2.3534
sp|P50213|IDH3A_HUMAN	0	0	NA	0	0	NA	0	0	NA	0	0	NA	0	0	NA	0	0	NA	0	0	NA	0	0	NA	0	0	NA	0	0	NA	0	0	NA	0	0	NA	0	0	NA	0	0	NA	26.805
sp|P50395|GDIB_HUMAN	0	0	NA	0	0	NA	0	0	NA	0	0	NA	3	1	0.70759	3	1	0.61421	3	1	0.69906	0	0	NA	2	1	0.43472	1	0	NA	0	0	NA	0	0	NA	0	0	NA	0	0	NA	4.336
sp|P50402|EMD_HUMAN	7	7	0.24019	9	9	2.5272	8	8	0.53815	9	9	0.76031	10	10	0.89449	11	11	0.81315	11	11	0.97323	11	11	0.81542	11	11	0.86536	8	8	0.90016	2	2	0.76272	0	0	NA	0	0	NA	0	0	NA	323.31
sp|P50454|SERPH_HUMAN	0	0	NA	0	0	NA	0	0	NA	0	0	NA	1	1	0.70564	1	1	0.67957	1	1	1.1463	0	0	NA	0	0	NA	0	0	NA	0	0	NA	0	0	NA	0	0	NA	0	0	NA	8.229
sp|Q8IZP2|ST134_HUMAN;sp|P50502|F10A1_HUMAN;sp|Q8NFI4|F10A5_HUMAN	0	0	NA	0	0	NA	0	0	NA	0	0	NA	1	1	0.44111	1	1	0.38716	0	0	NA	0	0	NA	0	0	NA	0	0	NA	0	0	NA	0	0	NA	0	0	NA	0	0	NA	6.236
sp|P50914|RL14_HUMAN	1	1	0.29494	1	1	2.6122	2	2	0.77891	1	1	0.75712	3	3	2.2936	2	2	1.8625	4	4	0.56181	3	3	0.47103	4	4	1.6504	4	4	0.50393	4	4	0.91255	3	3	8.093	3	3	2.9172	3	3	7.9789	266.42
sp|P50990|TCPQ_HUMAN	0	0	NA	0	0	NA	1	1	0.9816	0	0	NA	15	15	0.60204	15	15	0.56601	7	7	1.9664	6	6	1.9365	12	12	0.57544	4	4	1.7167	0	0	NA	1	1	NA	0	0	NA	0	0	NA	147.49
sp|P50991|TCPD_HUMAN	0	0	NA	0	0	NA	0	0	NA	1	1	1.1005	10	10	0.60474	10	10	0.57588	5	5	1.7194	5	5	1.44	7	7	0.54768	2	2	1.322	0	0	NA	0	0	NA	0	0	NA	0	0	NA	97.785
sp|P50995|ANX11_HUMAN	0	0	NA	0	0	NA	0	0	NA	0	0	NA	0	0	NA	0	0	NA	0	0	NA	0	0	NA	0	0	NA	0	0	NA	0	0	NA	0	0	NA	0	0	NA	0	0	NA	9.2647
sp|P51114|FXR1_HUMAN	0	0	NA	0	0	NA	0	0	NA	1	0	NA	1	0	NA	0	0	NA	2	1	0.79264	1	0	NA	0	0	NA	3	2	0.68392	20	20	0.18366	15	14	7.978	19	18	0.74699	14	13	2.9916	304.66
sp|P51116|FXR2_HUMAN	1	0	NA	1	0	NA	1	0	NA	2	0	NA	4	3	1.8	1	1	1.6435	4	1	0.79252	1	0	NA	0	0	NA	4	1	NA	19	17	0.24648	13	10	9.5126	17	14	0.91985	15	12	4.3647	323.31
sp|P51148|RAB5C_HUMAN;tr|K7ERQ8|K7ERQ8_HUMAN;sp|P61020|RAB5B_HUMAN	0	0	NA	0	0	NA	0	0	NA	0	0	NA	0	0	NA	0	0	NA	0	0	NA	0	0	NA	0	0	NA	0	0	NA	0	0	NA	0	0	NA	0	0	NA	0	0	NA	3.2269
sp|P51149|RAB7A_HUMAN	0	0	NA	0	0	NA	0	0	NA	0	0	NA	1	1	1.2743	1	1	NA	0	0	NA	0	0	NA	0	0	NA	0	0	NA	0	0	NA	0	0	NA	0	0	NA	0	0	NA	3.2504
sp|P51398|RT29_HUMAN	0	0	NA	0	0	NA	0	0	NA	2	2	0.44971	1	1	1.0188	0	0	NA	1	1	0.72554	1	1	0.46455	1	1	0.76071	1	1	0.72468	0	0	NA	1	1	2.859	1	1	NA	0	0	NA	150.59
sp|P51532|SMCA4_HUMAN	0	0	NA	0	0	NA	0	0	NA	0	0	NA	2	2	0.68134	0	0	NA	0	0	NA	0	0	NA	0	0	NA	0	0	NA	0	0	NA	0	0	NA	0	0	NA	0	0	NA	2.9516
sp|P51571|SSRD_HUMAN	0	0	NA	0	0	NA	2	2	0.57712	0	0	NA	2	2	0.58141	2	2	0.57742	1	1	0.67712	1	1	0.44276	1	1	0.2463	0	0	NA	0	0	NA	0	0	NA	0	0	NA	0	0	NA	29.419
sp|P51580|TPMT_HUMAN	0	0	NA	0	0	NA	0	0	NA	0	0	NA	0	0	NA	0	0	NA	0	0	NA	0	0	NA	0	0	NA	0	0	NA	0	0	NA	0	0	NA	0	0	NA	0	0	NA	2.1688
sp|P51610|HCFC1_HUMAN;sp|Q9Y5Z7|HCFC2_HUMAN	0	0	NA	0	0	NA	0	0	NA	0	0	NA	2	2	0.96896	1	1	0.50327	0	0	NA	1	1	0.46391	0	0	NA	0	0	NA	0	0	NA	0	0	NA	0	0	NA	0	0	NA	26.507
sp|P51648|AL3A2_HUMAN	0	0	NA	0	0	NA	0	0	NA	0	0	NA	1	1	0.94383	2	2	1.2014	0	0	NA	1	1	1.6942	0	0	NA	1	1	1.1166	0	0	NA	0	0	NA	0	0	NA	0	0	NA	5.7627
sp|P51659|DHB4_HUMAN	0	0	NA	0	0	NA	0	0	NA	0	0	NA	1	1	NA	0	0	NA	0	0	NA	0	0	NA	0	0	NA	0	0	NA	0	0	NA	0	0	NA	0	0	NA	0	0	NA	28.352
sp|P51858|HDGF_HUMAN	0	0	NA	0	0	NA	0	0	NA	0	0	NA	0	0	NA	0	0	NA	0	0	NA	0	0	NA	0	0	NA	0	0	NA	0	0	NA	0	0	NA	0	0	NA	0	0	NA	323.31
sp|P51991|ROA3_HUMAN	4	4	3.2979	0	0	NA	1	1	0.81474	3	3	0.596	2	2	1.3998	2	2	1.2555	3	3	0.90166	2	2	1.1734	3	3	1.1624	3	3	0.93023	8	8	0.11677	5	5	NA	7	7	0.41972	6	6	1.5262	283.2
sp|P52209|6PGD_HUMAN	0	0	NA	0	0	NA	0	0	NA	0	0	NA	1	1	0.95644	2	2	0.85862	1	1	NA	1	1	NA	1	1	0.64049	1	1	2.9806	0	0	NA	0	0	NA	0	0	NA	0	0	NA	25.199
sp|P52272|HNRPM_HUMAN	10	10	0.94941	4	4	1.2024	15	15	0.7795	14	14	0.65319	33	33	1.7775	34	34	1.8	35	35	0.99012	36	36	1.0529	19	19	1.4817	22	22	0.90919	21	21	0.80452	26	26	10.127	25	25	2.7956	22	22	8.1333	323.31
sp|P52292|IMA1_HUMAN	0	0	NA	0	0	NA	0	0	NA	0	0	NA	4	4	0.65595	3	3	0.89837	3	3	0.92811	1	1	1.4847	2	2	0.61871	1	1	0.56789	0	0	NA	1	1	NA	0	0	NA	0	0	NA	194.37
sp|P52294|IMA5_HUMAN	1	1	0.25734	1	1	3.908	0	0	NA	0	0	NA	4	4	1.8048	3	3	2.1152	2	2	2.0318	3	3	1.5825	1	1	2.1402	1	1	1.8511	0	0	NA	1	1	NA	1	1	1.1961	0	0	NA	99.726
sp|P52298|NCBP2_HUMAN	0	0	NA	0	0	NA	0	0	NA	1	1	0.48342	0	0	NA	0	0	NA	1	1	NA	0	0	NA	0	0	NA	0	0	NA	2	2	1.5133	2	2	9.9384	2	2	3.3537	2	2	6.371	61.196
sp|P52434|RPAB3_HUMAN	0	0	NA	0	0	NA	0	0	NA	0	0	NA	0	0	NA	0	0	NA	0	0	NA	0	0	NA	0	0	NA	0	0	NA	1	1	0.3753	0	0	NA	1	1	1.3021	1	1	NA	4.1233
sp|P52597|HNRPF_HUMAN	7	5	0.67267	7	5	0.95843	10	8	0.77069	7	5	0.6632	10	8	1.3047	12	10	1.1424	12	10	0.62158	12	10	0.51103	9	7	1.0534	11	9	0.57152	11	10	0.54559	10	8	10.74	11	10	1.8353	9	8	4.3424	323.31
sp|P52701|MSH6_HUMAN	0	0	NA	0	0	NA	0	0	NA	0	0	NA	10	10	0.5893	9	9	0.56092	9	9	0.59632	9	9	0.47564	6	6	0.50305	9	9	0.58779	0	0	NA	0	0	NA	0	0	NA	0	0	NA	101.11
sp|P52732|KIF11_HUMAN	0	0	NA	0	0	NA	0	0	NA	0	0	NA	1	1	0.51179	2	2	0.52989	0	0	NA	1	1	0.55492	0	0	NA	0	0	NA	0	0	NA	0	0	NA	0	0	NA	0	0	NA	8.306
sp|P52756|RBM5_HUMAN	0	0	NA	0	0	NA	0	0	NA	0	0	NA	0	0	NA	0	0	NA	0	0	NA	0	0	NA	0	0	NA	0	0	NA	0	0	NA	0	0	NA	0	0	NA	0	0	NA	28.35
sp|P52888|THOP1_HUMAN	0	0	NA	0	0	NA	0	0	NA	0	0	NA	2	2	0.681	1	1	0.44924	1	1	2.0965	0	0	NA	0	0	NA	0	0	NA	0	0	NA	0	0	NA	0	0	NA	0	0	NA	9.6108
sp|P52907|CAZA1_HUMAN	0	0	NA	0	0	NA	2	2	0.5591	0	0	NA	2	2	0.54948	3	3	0.40338	1	1	1.48	0	0	NA	1	1	0.44479	1	1	NA	0	0	NA	1	1	3.4377	0	0	NA	1	1	NA	131.53
sp|P52948|NUP98_HUMAN	0	0	NA	0	0	NA	0	0	NA	0	0	NA	1	1	0.56869	1	1	0.92403	0	0	NA	0	0	NA	0	0	NA	0	0	NA	0	0	NA	0	0	NA	0	0	NA	0	0	NA	2.6721
sp|P53004|BIEA_HUMAN	0	0	NA	0	0	NA	0	0	NA	0	0	NA	0	0	NA	0	0	NA	0	0	NA	0	0	NA	0	0	NA	0	0	NA	0	0	NA	0	0	NA	0	0	NA	0	0	NA	57.681
sp|P53007|TXTP_HUMAN	0	0	NA	0	0	NA	0	0	NA	2	2	0.64257	2	2	0.46326	3	3	0.49371	4	4	0.60632	3	3	0.48599	2	2	0.3704	2	2	0.28863	0	0	NA	0	0	NA	0	0	NA	0	0	NA	21.023
sp|P53041|PPP5_HUMAN	1	1	0.32407	2	2	4.5193	0	0	NA	1	1	1.0513	4	4	0.46976	7	7	0.3125	1	1	1.0757	2	2	0.70157	4	4	0.43784	2	2	1.1962	0	0	NA	0	0	NA	0	0	NA	0	0	NA	129.8
sp|P53350|PLK1_HUMAN	0	0	NA	0	0	NA	0	0	NA	0	0	NA	1	1	0.63706	1	1	NA	1	1	NA	0	0	NA	0	0	NA	0	0	NA	0	0	NA	0	0	NA	0	0	NA	0	0	NA	2.0446
sp|P53384|NUBP1_HUMAN	0	0	NA	0	0	NA	0	0	NA	0	0	NA	0	0	NA	0	0	NA	0	0	NA	0	0	NA	0	0	NA	0	0	NA	0	0	NA	0	0	NA	0	0	NA	0	0	NA	9.2054
sp|P53396|ACLY_HUMAN	0	0	NA	0	0	NA	0	0	NA	0	0	NA	11	11	0.53116	15	15	0.5432	5	5	1.6174	5	5	1.2437	11	11	0.53486	7	7	1.6584	0	0	NA	0	0	NA	0	0	NA	0	0	NA	125.46
sp|P53597|SUCA_HUMAN	0	0	NA	0	0	NA	0	0	NA	0	0	NA	1	1	NA	1	1	NA	0	0	NA	0	0	NA	1	1	NA	0	0	NA	0	0	NA	0	0	NA	0	0	NA	0	0	NA	11.796
sp|P53618|COPB_HUMAN	0	0	NA	0	0	NA	0	0	NA	0	0	NA	14	14	0.6828	11	11	0.66471	9	9	1.2089	10	10	1.0642	7	7	0.61518	3	3	1.0406	0	0	NA	0	0	NA	0	0	NA	0	0	NA	157.65
sp|P53621|COPA_HUMAN	0	0	NA	0	0	NA	0	0	NA	1	1	0.58167	20	20	0.80294	20	20	0.75159	15	15	1.3388	12	12	1.2636	14	14	0.62144	9	9	1.109	0	0	NA	0	0	NA	0	0	NA	0	0	NA	165.11
sp|P53701|CCHL_HUMAN	0	0	NA	0	0	NA	0	0	NA	0	0	NA	0	0	NA	0	0	NA	0	0	NA	0	0	NA	0	0	NA	0	0	NA	0	0	NA	0	0	NA	0	0	NA	0	0	NA	9.8559
sp|P53985|MOT1_HUMAN	0	0	NA	0	0	NA	1	1	0.52585	1	1	0.63697	3	3	0.42096	4	4	0.4526	3	3	0.60219	3	3	0.44627	1	1	0.73927	1	1	NA	0	0	NA	0	0	NA	0	0	NA	0	0	NA	19.08
sp|P53992|SC24C_HUMAN	0	0	NA	0	0	NA	0	0	NA	0	0	NA	0	0	NA	1	1	0.79797	0	0	NA	0	0	NA	1	1	NA	0	0	NA	0	0	NA	0	0	NA	0	0	NA	0	0	NA	6.2248
sp|P53999|TCP4_HUMAN	0	0	NA	0	0	NA	0	0	NA	0	0	NA	0	0	NA	0	0	NA	0	0	NA	0	0	NA	0	0	NA	0	0	NA	0	0	NA	0	0	NA	0	0	NA	0	0	NA	2.1806
sp|P54105|ICLN_HUMAN	0	0	NA	0	0	NA	0	0	NA	0	0	NA	0	0	NA	0	0	NA	0	0	NA	0	0	NA	0	0	NA	0	0	NA	0	0	NA	1	1	1.9094	0	0	NA	0	0	NA	127.61
sp|P54136|SYRC_HUMAN	0	0	NA	0	0	NA	0	0	NA	0	0	NA	7	7	0.75853	10	10	0.71072	4	4	1.3008	4	4	1.0899	9	9	0.60561	6	6	1.2187	0	0	NA	0	0	NA	0	0	NA	0	0	NA	59.409
sp|P54577|SYYC_HUMAN	1	1	0.26489	0	0	NA	0	0	NA	0	0	NA	2	2	1.2102	4	4	1.0502	0	0	NA	0	0	NA	4	4	0.91959	0	0	NA	0	0	NA	0	0	NA	0	0	NA	0	0	NA	14.365
sp|P54619|AAKG1_HUMAN;sp|Q9UGJ0|AAKG2_HUMAN	0	0	NA	0	0	NA	0	0	NA	0	0	NA	0	0	NA	0	0	NA	0	0	NA	0	0	NA	0	0	NA	0	0	NA	0	0	NA	0	0	NA	0	0	NA	0	0	NA	4.0951
sp|P54652|HSP72_HUMAN	8	0	NA	8	0	NA	9	1	0.43971	8	0	NA	10	0	NA	9	0	NA	9	0	NA	10	0	NA	10	2	0.17298	10	2	0.34376	8	0	NA	8	0	NA	9	0	NA	7	0	NA	4.8376
sp|P54707|AT12A_HUMAN;REV__sp|Q15772|SPEG_HUMAN	0	0	NA	0	0	NA	1	0	NA	2	0	NA	3	0	NA	3	0	NA	2	0	NA	3	0	NA	2	0	NA	2	0	NA	0	0	NA	0	0	NA	0	0	NA	0	0	NA	-2
sp|P54709|AT1B3_HUMAN	0	0	NA	0	0	NA	0	0	NA	0	0	NA	0	0	NA	0	0	NA	0	0	NA	0	0	NA	0	0	NA	0	0	NA	0	0	NA	0	0	NA	0	0	NA	0	0	NA	2.861
sp|P54727|RD23B_HUMAN;sp|P54725|RD23A_HUMAN	0	0	NA	0	0	NA	0	0	NA	0	0	NA	0	0	NA	0	0	NA	1	1	1.3252	0	0	NA	1	1	1.8027	0	0	NA	0	0	NA	0	0	NA	0	0	NA	0	0	NA	5.5357
sp|P54819|KAD2_HUMAN	0	0	NA	0	0	NA	0	0	NA	0	0	NA	0	0	NA	0	0	NA	0	0	NA	0	0	NA	0	0	NA	0	0	NA	0	0	NA	0	0	NA	0	0	NA	0	0	NA	2.2506
sp|P54886|P5CS_HUMAN	0	0	NA	0	0	NA	0	0	NA	0	0	NA	6	6	0.64391	4	4	0.49272	2	2	1.0568	2	2	0.96708	2	2	0.59011	1	1	1.2078	0	0	NA	0	0	NA	1	1	NA	0	0	NA	63.982
sp|P54920|SNAA_HUMAN	0	0	NA	0	0	NA	0	0	NA	0	0	NA	0	0	NA	0	0	NA	0	0	NA	0	0	NA	0	0	NA	0	0	NA	0	0	NA	0	0	NA	0	0	NA	0	0	NA	23.165
sp|P55036|PSMD4_HUMAN	0	0	NA	0	0	NA	0	0	NA	0	0	NA	0	0	NA	1	1	0.59246	0	0	NA	0	0	NA	0	0	NA	0	0	NA	0	0	NA	0	0	NA	0	0	NA	0	0	NA	3.1125
sp|P55060|XPO2_HUMAN	0	0	NA	0	0	NA	0	0	NA	0	0	NA	5	5	1.5229	4	4	0.59236	6	6	0.84633	4	4	1.0843	5	5	0.49425	4	4	0.74041	0	0	NA	1	1	8.6463	1	1	1.791	1	1	4.0771	66.96
sp|P55072|TERA_HUMAN	0	0	NA	0	0	NA	0	0	NA	0	0	NA	10	10	0.84194	10	10	0.91606	9	9	2.7205	5	5	2.9334	12	12	0.67685	9	9	3.0769	0	0	NA	0	0	NA	0	0	NA	0	0	NA	217.91
sp|P55081|MFAP1_HUMAN	0	0	NA	0	0	NA	0	0	NA	0	0	NA	0	0	NA	0	0	NA	1	1	0.4756	0	0	NA	0	0	NA	0	0	NA	6	6	1.0364	5	5	2.7418	4	4	2.8054	4	4	4.1947	51.264
sp|P55084|ECHB_HUMAN	0	0	NA	0	0	NA	0	0	NA	0	0	NA	2	2	0.93575	2	2	0.605	1	1	1.2971	0	0	NA	0	0	NA	0	0	NA	0	0	NA	0	0	NA	0	0	NA	0	0	NA	4.7744
sp|P55196|AFAD_HUMAN	0	0	NA	0	0	NA	0	0	NA	0	0	NA	0	0	NA	0	0	NA	0	0	NA	0	0	NA	0	0	NA	0	0	NA	0	0	NA	0	0	NA	0	0	NA	0	0	NA	4.3185
sp|P55209|NP1L1_HUMAN	4	4	0.25281	4	4	3.046	5	5	0.43991	7	7	0.64263	9	9	0.55988	9	9	0.54854	6	6	1.2417	5	5	1.1053	8	8	0.52544	5	5	1.1675	0	0	NA	0	0	NA	0	0	NA	0	0	NA	175.56
sp|P55210|CASP7_HUMAN	0	0	NA	0	0	NA	0	0	NA	0	0	NA	0	0	NA	0	0	NA	0	0	NA	0	0	NA	0	0	NA	0	0	NA	0	0	NA	0	0	NA	0	0	NA	0	0	NA	2.6866
sp|P55265|DSRAD_HUMAN	0	0	NA	0	0	NA	0	0	NA	0	0	NA	3	3	0.93635	3	3	1.2016	4	4	0.76447	3	3	0.69501	5	5	0.58339	3	3	0.66241	0	0	NA	0	0	NA	0	0	NA	0	0	NA	74.345
sp|P55735|SEC13_HUMAN	0	0	NA	0	0	NA	0	0	NA	0	0	NA	2	2	1.0512	1	1	NA	1	1	NA	1	1	NA	1	1	NA	0	0	NA	0	0	NA	0	0	NA	0	0	NA	0	0	NA	202.94
sp|P55769|NH2L1_HUMAN	0	0	NA	0	0	NA	0	0	NA	0	0	NA	1	1	0.12374	0	0	NA	1	1	0.15406	1	1	0.21142	0	0	NA	1	1	0.68364	0	0	NA	1	1	0.57908	0	0	NA	0	0	NA	41.217
sp|P55786|PSA_HUMAN;sp|A6NEC2|PSAL_HUMAN	0	0	NA	0	0	NA	0	0	NA	0	0	NA	3	3	0.64365	2	2	0.58504	2	2	1.2474	2	2	1.3555	4	4	0.59335	1	1	1.7026	0	0	NA	0	0	NA	0	0	NA	0	0	NA	18.868
sp|P55795|HNRH2_HUMAN	4	0	NA	4	0	NA	7	3	0.82317	7	3	0.58581	8	3	1.5084	8	3	1.4793	9	4	0.81355	7	3	0.77956	6	2	1.6455	7	3	0.71195	9	3	0.38051	10	4	13.364	8	3	1.2835	9	3	4.3912	303.84
sp|Q6EEV6|SUMO4_HUMAN;sp|P61956|SUMO2_HUMAN;sp|P55854|SUMO3_HUMAN	1	1	2.1666	0	0	NA	0	0	NA	0	0	NA	1	1	1.9081	1	1	1.98	1	1	2.2763	1	1	2.4288	0	0	NA	0	0	NA	0	0	NA	0	0	NA	0	0	NA	0	0	NA	23.842
sp|P55884|EIF3B_HUMAN	0	0	NA	0	0	NA	1	1	0.64121	1	1	3.2209	15	15	0.79638	14	14	0.73544	11	11	1.4711	11	11	0.98391	10	10	0.64797	7	7	1.0974	0	0	NA	0	0	NA	0	0	NA	0	0	NA	207.15
sp|P56182|RRP1_HUMAN	0	0	NA	0	0	NA	0	0	NA	0	0	NA	2	2	1.8086	1	1	2.0622	4	4	0.60979	2	2	0.65684	1	1	2.699	1	1	1.2023	2	2	0.80263	1	1	NA	0	0	NA	1	1	NA	110.74
sp|P56192|SYMC_HUMAN	0	0	NA	0	0	NA	0	0	NA	0	0	NA	9	9	0.6399	6	6	0.72127	5	5	1.1332	4	4	1.0859	6	6	0.57513	4	4	1.1764	0	0	NA	0	0	NA	0	0	NA	0	0	NA	75.904
sp|P56537|IF6_HUMAN;tr|A0A0U1RQV5|A0A0U1RQV5_HUMAN	0	0	NA	0	0	NA	0	0	NA	1	1	1.0679	3	3	2.2339	1	1	NA	4	4	0.95781	2	2	1.3078	2	2	0.69435	1	1	0.75769	2	2	0.45448	1	1	NA	0	0	NA	0	0	NA	158.88
sp|P56545|CTBP2_HUMAN;sp|Q13363|CTBP1_HUMAN	0	0	NA	0	0	NA	0	0	NA	0	0	NA	1	1	0.89416	1	1	NA	1	1	1.3458	1	1	1.2884	0	0	NA	0	0	NA	0	0	NA	0	0	NA	0	0	NA	0	0	NA	4.8875
sp|P56937|DHB7_HUMAN	0	0	NA	0	0	NA	0	0	NA	0	0	NA	0	0	NA	0	0	NA	0	0	NA	0	0	NA	0	0	NA	0	0	NA	0	0	NA	0	0	NA	0	0	NA	0	0	NA	2.5862
sp|P57088|TMM33_HUMAN	0	0	NA	0	0	NA	0	0	NA	0	0	NA	0	0	NA	0	0	NA	0	0	NA	0	0	NA	1	1	0.54966	0	0	NA	0	0	NA	0	0	NA	0	0	NA	0	0	NA	7.5196
sp|P57678|GEMI4_HUMAN	0	0	NA	0	0	NA	0	0	NA	0	0	NA	2	2	0.71309	3	3	0.60575	2	2	0.69137	3	3	0.5348	1	1	0.58781	1	1	NA	0	0	NA	0	0	NA	0	0	NA	1	1	0.1551	36.816
sp|P57740|NU107_HUMAN	0	0	NA	0	0	NA	0	0	NA	0	0	NA	4	4	0.47282	2	2	0.30668	2	2	0.4889	2	2	0.63735	0	0	NA	1	1	NA	0	0	NA	0	0	NA	0	0	NA	0	0	NA	167.08
sp|P58107|EPIPL_HUMAN	0	0	NA	0	0	NA	0	0	NA	1	1	0.62514	4	2	0.75035	4	2	0.68	2	2	1.2463	1	1	1.063	2	1	0.89029	0	0	NA	0	0	NA	0	0	NA	0	0	NA	0	0	NA	140.83
sp|P60033|CD81_HUMAN	0	0	NA	0	0	NA	0	0	NA	1	1	0.74941	1	1	NA	1	1	0.47592	1	1	0.42658	2	2	0.75521	1	1	0.96174	1	1	1.0777	0	0	NA	0	0	NA	0	0	NA	0	0	NA	28.349
sp|P60174|TPIS_HUMAN	1	1	1.5026	0	0	NA	0	0	NA	0	0	NA	2	2	0.81631	1	1	NA	2	2	1.8096	1	1	1.3793	4	4	0.81486	2	2	2.3521	0	0	NA	0	0	NA	0	0	NA	0	0	NA	24.662
sp|P60228|EIF3E_HUMAN	0	0	NA	0	0	NA	0	0	NA	0	0	NA	0	0	NA	1	1	0.67879	0	0	NA	0	0	NA	0	0	NA	0	0	NA	0	0	NA	0	0	NA	0	0	NA	0	0	NA	18.735
sp|P60468|SC61B_HUMAN	0	0	NA	0	0	NA	0	0	NA	0	0	NA	0	0	NA	1	1	0.5092	0	0	NA	0	0	NA	0	0	NA	0	0	NA	0	0	NA	0	0	NA	0	0	NA	0	0	NA	2.2774
sp|P60510|PP4C_HUMAN	0	0	NA	0	0	NA	0	0	NA	0	0	NA	0	0	NA	1	0	NA	0	0	NA	0	0	NA	0	0	NA	0	0	NA	0	0	NA	0	0	NA	0	0	NA	0	0	NA	20.048
sp|P60660|MYL6_HUMAN;sp|P14649|MYL6B_HUMAN	0	0	NA	0	0	NA	0	0	NA	0	0	NA	0	0	NA	0	0	NA	0	0	NA	0	0	NA	1	1	0.40059	0	0	NA	0	0	NA	0	0	NA	0	0	NA	0	0	NA	47.331
sp|P60709|ACTB_HUMAN	13	13	0.88276	16	16	3.8323	14	14	0.88521	16	16	1.2037	22	22	0.63551	22	22	0.57144	21	21	1.8471	21	21	1.5417	20	20	0.54644	17	17	1.7163	15	15	0.5192	15	15	7.0633	13	13	1.5732	13	13	3.8596	323.31
sp|P60842|IF4A1_HUMAN	3	2	1.1927	3	1	2.1582	3	2	0.75929	6	3	0.91094	19	16	1.3356	14	11	1.2601	13	11	3.4219	12	10	3.0523	11	9	1.3736	9	7	3.3945	6	1	0.43971	4	0	NA	4	0	NA	5	0	NA	204.2
sp|P60866|RS20_HUMAN	0	0	NA	0	0	NA	1	1	0.59895	1	1	0.70381	1	1	0.99668	1	1	0.73911	2	2	0.74367	0	0	NA	2	2	0.91571	2	2	0.53362	2	2	0.9525	1	1	9.1188	2	2	2.943	2	2	8.3015	24.453
sp|P60891|PRPS1_HUMAN	0	0	NA	0	0	NA	0	0	NA	0	0	NA	1	1	0.81313	1	1	0.70478	1	1	3.1982	0	0	NA	2	2	0.81788	0	0	NA	0	0	NA	0	0	NA	0	0	NA	0	0	NA	320.33
sp|P60900|PSA6_HUMAN	0	0	NA	0	0	NA	0	0	NA	0	0	NA	2	2	0.80857	1	1	0.56639	0	0	NA	0	0	NA	1	1	0.84406	1	1	NA	0	0	NA	0	0	NA	0	0	NA	0	0	NA	7.483
sp|P61026|RAB10_HUMAN	0	0	NA	0	0	NA	0	0	NA	0	0	NA	2	2	0.89319	2	2	0.83985	0	0	NA	0	0	NA	1	1	0.70562	1	1	2.1083	0	0	NA	0	0	NA	0	0	NA	0	0	NA	6.9975
sp|P61158|ARP3_HUMAN;sp|Q9P1U1|ARP3B_HUMAN;sp|Q9C0K3|ARP3C_HUMAN	0	0	NA	0	0	NA	0	0	NA	0	0	NA	3	3	0.7212	3	3	0.68991	2	2	2.191	2	2	1.5871	2	2	0.56709	1	1	NA	0	0	NA	0	0	NA	0	0	NA	0	0	NA	20.701
sp|P61160|ARP2_HUMAN	0	0	NA	0	0	NA	0	0	NA	0	0	NA	2	2	0.60806	1	1	0.74341	0	0	NA	0	0	NA	2	2	0.66395	0	0	NA	0	0	NA	0	0	NA	0	0	NA	0	0	NA	3.6068
sp|P61163|ACTZ_HUMAN	0	0	NA	0	0	NA	0	0	NA	0	0	NA	4	4	0.5381	3	3	0.43179	2	2	1.2497	1	1	0.93113	1	1	0.20276	0	0	NA	0	0	NA	0	0	NA	0	0	NA	0	0	NA	34.23
sp|P84077|ARF1_HUMAN;sp|P61204|ARF3_HUMAN;tr|F5H423|F5H423_HUMAN;sp|P84085|ARF5_HUMAN;tr|H0YGG7|H0YGG7_HUMAN	0	0	NA	0	0	NA	0	0	NA	0	0	NA	0	0	NA	1	1	0.42954	0	0	NA	0	0	NA	1	1	0.40126	0	0	NA	0	0	NA	0	0	NA	0	0	NA	0	0	NA	13.327
sp|P61221|ABCE1_HUMAN	0	0	NA	0	0	NA	0	0	NA	0	0	NA	4	4	0.99889	6	6	0.5993	1	1	2.3098	3	3	1.7506	1	1	0.56553	1	1	1.6729	0	0	NA	0	0	NA	0	0	NA	0	0	NA	36.529
sp|P62834|RAP1A_HUMAN;sp|P61224|RAP1B_HUMAN;tr|A0A0J9YXB3|A0A0J9YXB3_HUMAN;sp|A6NIZ1|RP1BL_HUMAN	0	0	NA	0	0	NA	0	0	NA	0	0	NA	1	1	1.0257	0	0	NA	0	0	NA	0	0	NA	1	1	0.42631	0	0	NA	0	0	NA	0	0	NA	0	0	NA	0	0	NA	2.4882
sp|P61247|RS3A_HUMAN	0	0	NA	0	0	NA	0	0	NA	0	0	NA	6	6	1.142	4	4	0.93486	4	4	1.1937	3	3	1.0274	2	2	0.99645	1	1	0.82881	1	1	0.58501	0	0	NA	1	1	1.8794	2	2	5.1384	89.733
sp|P61254|RL26_HUMAN;tr|J3QQQ9|J3QQQ9_HUMAN	0	0	NA	0	0	NA	0	0	NA	0	0	NA	1	1	1.5593	0	0	NA	1	1	1.4116	1	1	1.341	0	0	NA	0	0	NA	1	1	0.42817	0	0	NA	1	1	2.0324	0	0	NA	8.8012
sp|P61289|PSME3_HUMAN	0	0	NA	0	0	NA	0	0	NA	0	0	NA	0	0	NA	0	0	NA	0	0	NA	0	0	NA	0	0	NA	0	0	NA	0	0	NA	0	0	NA	0	0	NA	0	0	NA	42.913
sp|P61313|RL15_HUMAN	2	2	0.22123	2	2	5.7835	0	0	NA	3	3	0.93469	6	6	1.8715	6	6	1.8395	9	9	0.51784	5	5	0.56294	6	6	1.652	5	5	0.54192	6	6	0.86814	5	5	17.983	5	5	2.5047	5	5	8.5135	155.83
sp|P61326|MGN_HUMAN	0	0	NA	1	1	0.39072	2	2	1.8681	4	4	0.16248	1	1	1.3092	0	0	NA	0	0	NA	1	1	0.59634	2	2	1.6952	2	2	0.74583	6	6	1.141	5	5	12.526	5	5	3.4865	6	6	6.1795	281.81
sp|P61353|RL27_HUMAN	1	1	0.4132	1	1	1.3744	4	4	1.0719	3	3	0.58985	4	4	1.7166	3	3	2.458	6	6	0.50476	5	5	0.4838	3	3	1.6314	5	5	0.47127	6	6	1.0786	6	6	10.942	5	5	3.5479	5	5	7.6197	94.327
sp|P61421|VA0D1_HUMAN	0	0	NA	0	0	NA	0	0	NA	0	0	NA	0	0	NA	0	0	NA	0	0	NA	0	0	NA	0	0	NA	0	0	NA	0	0	NA	0	0	NA	0	0	NA	0	0	NA	11.213
sp|P61513|RL37A_HUMAN;sp|A6NKH3|RL37L_HUMAN	0	0	NA	0	0	NA	0	0	NA	0	0	NA	1	1	2.0577	1	1	1.5112	2	2	0.61369	1	1	0.75527	1	1	1.469	2	2	0.47272	1	1	0.69635	1	1	NA	0	0	NA	1	1	NA	62.145
sp|P61565|ENK21_HUMAN;sp|Q902F9|EN113_HUMAN;sp|P63135|POK7_HUMAN	0	0	NA	0	0	NA	0	0	NA	0	0	NA	1	1	0.46395	1	1	0.38194	1	1	0.61999	1	1	0.47405	0	0	NA	0	0	NA	0	0	NA	0	0	NA	0	0	NA	0	0	NA	3.1039
sp|P61619|S61A1_HUMAN	0	0	NA	0	0	NA	0	0	NA	0	0	NA	3	3	0.56444	2	2	0.57262	2	2	0.8371	1	1	0.68212	3	3	0.64169	2	2	0.78012	0	0	NA	0	0	NA	0	0	NA	0	0	NA	8.2744
sp|P61626|LYSC_HUMAN	0	0	NA	0	0	NA	0	0	NA	0	0	NA	0	0	NA	0	0	NA	0	0	NA	0	0	NA	0	0	NA	0	0	NA	0	0	NA	0	0	NA	1	1	NA	0	0	NA	201.49
sp|P61962|DCAF7_HUMAN	0	0	NA	0	0	NA	0	0	NA	0	0	NA	1	1	NA	0	0	NA	1	1	0.58053	0	0	NA	0	0	NA	1	1	0.84751	0	0	NA	0	0	NA	0	0	NA	0	0	NA	10.062
sp|P61978|HNRPK_HUMAN	7	7	1.3223	7	7	2.283	12	12	0.65058	14	14	0.60539	12	12	1.2354	13	13	1.0604	13	13	1.2394	12	12	1.1244	12	12	1.086	12	12	1.1421	15	15	0.21987	12	12	9.8647	13	13	0.91374	14	14	3.2725	323.31
sp|P61981|1433G_HUMAN	1	0	NA	0	0	NA	1	0	NA	1	0	NA	2	1	0.81659	3	1	0.66831	2	1	1.2456	3	1	1.3598	3	1	NA	2	0	NA	1	0	NA	1	0	NA	1	0	NA	1	0	NA	22.664
sp|P62081|RS7_HUMAN	0	0	NA	0	0	NA	0	0	NA	0	0	NA	1	1	1.078	0	0	NA	0	0	NA	0	0	NA	1	1	0.46939	0	0	NA	0	0	NA	0	0	NA	0	0	NA	0	0	NA	6.8149
sp|P62136|PP1A_HUMAN	0	0	NA	0	0	NA	0	0	NA	1	1	0.84912	3	3	0.73144	1	1	0.74905	1	1	1.2888	0	0	NA	2	2	0.8261	2	2	1.2796	0	0	NA	1	1	NA	0	0	NA	0	0	NA	142.99
sp|P62140|PP1B_HUMAN	0	0	NA	0	0	NA	0	0	NA	1	0	NA	2	0	NA	1	0	NA	1	0	NA	0	0	NA	2	0	NA	2	0	NA	0	0	NA	1	0	NA	0	0	NA	0	0	NA	7.0267
sp|P62158|CALM_HUMAN	0	0	NA	0	0	NA	0	0	NA	0	0	NA	0	0	NA	0	0	NA	0	0	NA	0	0	NA	1	1	0.66617	1	1	0.74358	0	0	NA	0	0	NA	0	0	NA	0	0	NA	5.1411
sp|P62191|PRS4_HUMAN	0	0	NA	0	0	NA	0	0	NA	0	0	NA	7	7	0.7679	5	5	0.74652	3	3	1.041	3	3	1.2234	1	1	0.57884	1	1	0.55934	0	0	NA	0	0	NA	0	0	NA	0	0	NA	58.732
sp|P62195|PRS8_HUMAN	0	0	NA	0	0	NA	0	0	NA	1	1	0.71067	4	4	0.80295	5	5	0.68359	2	2	1.3088	3	3	1.3125	1	1	NA	2	2	1.4983	0	0	NA	0	0	NA	0	0	NA	0	0	NA	41.324
sp|P62241|RS8_HUMAN	1	1	0.80198	1	1	1.7689	6	6	0.48437	6	6	0.73331	11	11	1.895	10	10	1.9365	12	12	0.57236	11	11	0.57147	10	10	1.6711	10	10	0.61097	11	11	0.11853	11	11	25.494	10	10	0.24175	11	11	0.39219	323.31
sp|P62244|RS15A_HUMAN;tr|H3BN98|H3BN98_HUMAN	0	0	NA	0	0	NA	0	0	NA	0	0	NA	1	1	0.91487	2	2	0.71306	1	1	0.6529	0	0	NA	0	0	NA	0	0	NA	3	3	0.21799	4	4	4.3512	3	3	1.1799	4	4	3.4826	61.322
sp|P62249|RS16_HUMAN	1	1	0.63655	1	1	3.4178	2	2	0.81979	0	0	NA	7	7	1.1617	5	5	1.3913	7	7	1.0869	4	4	1.3271	4	4	0.91897	5	5	0.73962	8	8	1.0205	2	2	9.83	5	5	2.9736	4	4	9.4819	48.721
sp|P62258|1433E_HUMAN	1	1	1.2919	0	0	NA	1	1	0.79336	2	2	0.77269	4	4	0.8792	4	4	0.78031	3	3	1.0937	4	4	0.97203	4	4	0.5615	5	5	0.89354	1	1	0.16692	1	1	1.3847	1	1	0.85186	1	1	2.5436	323.31
sp|P62263|RS14_HUMAN	1	1	0.8213	0	0	NA	1	1	0.56248	1	1	0.83691	2	2	0.69181	3	3	0.58067	3	3	0.5421	2	2	0.56337	2	2	0.58081	1	1	0.66505	3	3	0.51676	0	0	NA	0	0	NA	2	2	3.7285	53.485
sp|P62266|RS23_HUMAN	1	1	0.75073	1	1	1.868	1	1	0.53945	0	0	NA	2	2	0.79094	2	2	0.65959	2	2	0.75637	2	2	0.67643	1	1	0.64442	1	1	0.81368	2	2	0.2655	2	2	2.4071	1	1	1.1715	2	2	1.9037	89.198
sp|P62269|RS18_HUMAN	0	0	NA	0	0	NA	2	2	1.0568	0	0	NA	5	5	1.2798	3	3	0.83559	5	5	1.2006	2	2	1.1465	5	5	0.72782	4	4	0.65656	6	6	0.84606	3	3	6.7879	4	4	3.1019	3	3	4.8493	188.47
sp|P62277|RS13_HUMAN	0	0	NA	0	0	NA	1	1	0.79115	1	1	0.61351	3	3	1.0691	3	3	0.93881	2	2	0.92936	3	3	0.8721	0	0	NA	1	1	0.77531	6	6	0.2827	4	4	7.8119	4	4	1.7671	5	5	5.0367	81.354
sp|P62280|RS11_HUMAN	0	0	NA	1	1	1.9674	2	2	0.52382	3	3	0.66471	6	6	0.68234	7	7	0.58278	8	8	0.79479	8	8	0.64653	3	3	0.67259	0	0	NA	5	5	0.33383	5	5	10.934	3	3	1.6009	2	2	3.5488	75.689
sp|P62304|RUXE_HUMAN	0	0	NA	0	0	NA	1	1	1.1591	0	0	NA	0	0	NA	0	0	NA	0	0	NA	0	0	NA	0	0	NA	0	0	NA	2	2	1.2045	2	2	29.657	2	2	3.9177	2	2	9.4057	36.258
sp|P62306|RUXF_HUMAN	0	0	NA	0	0	NA	0	0	NA	0	0	NA	0	0	NA	1	1	NA	1	1	0.60032	0	0	NA	0	0	NA	0	0	NA	1	1	1.1729	1	1	17.131	1	1	3.9713	1	1	8.3413	48.999
sp|P62310|LSM3_HUMAN	0	0	NA	0	0	NA	0	0	NA	0	0	NA	0	0	NA	0	0	NA	0	0	NA	0	0	NA	0	0	NA	0	0	NA	0	0	NA	0	0	NA	0	0	NA	0	0	NA	3.0696
sp|P62314|SMD1_HUMAN	0	0	NA	0	0	NA	1	1	1.9094	1	1	0.46663	0	0	NA	1	1	0.95457	0	0	NA	0	0	NA	1	1	0.99808	0	0	NA	2	2	1.2026	3	3	17.96	2	2	3.636	2	2	8.8189	97.239
sp|P62316|SMD2_HUMAN	0	0	NA	0	0	NA	0	0	NA	0	0	NA	0	0	NA	1	1	1.889	0	0	NA	1	1	0.86749	1	1	NA	0	0	NA	6	6	1.0158	6	6	26.937	5	5	3.7263	5	5	8.0531	175.51
sp|P62318|SMD3_HUMAN	0	0	NA	0	0	NA	0	0	NA	1	1	0.2965	0	0	NA	0	0	NA	0	0	NA	0	0	NA	2	2	1.3087	2	2	0.7513	3	3	1.109	3	3	11.913	3	3	3.2245	3	3	6.5325	98.152
sp|P62333|PRS10_HUMAN	0	0	NA	0	0	NA	0	0	NA	0	0	NA	2	2	0.7013	1	1	0.60076	1	1	0.57795	1	1	1.1043	1	1	0.46135	0	0	NA	0	0	NA	0	0	NA	0	0	NA	0	0	NA	5.7115
sp|P62424|RL7A_HUMAN	5	5	0.22601	2	2	6.4149	1	1	0.43155	1	1	0.93968	15	15	1.8718	13	13	1.8092	16	16	0.49368	16	16	0.49613	14	14	1.6539	13	13	0.48232	16	16	0.85882	11	11	9.1544	15	15	2.8152	17	17	5.7175	323.31
sp|P62487|RPB7_HUMAN	0	0	NA	0	0	NA	0	0	NA	0	0	NA	0	0	NA	0	0	NA	0	0	NA	0	0	NA	0	0	NA	0	0	NA	2	2	0.58509	3	3	7.1708	3	3	1.6256	3	3	3.7859	4.1489
sp|P62491|RB11A_HUMAN;sp|Q15907|RB11B_HUMAN;sp|P57735|RAB25_HUMAN	0	0	NA	0	0	NA	0	0	NA	0	0	NA	0	0	NA	0	0	NA	0	0	NA	0	0	NA	0	0	NA	0	0	NA	0	0	NA	0	0	NA	0	0	NA	0	0	NA	3.9053
sp|P62633|CNBP_HUMAN	0	0	NA	0	0	NA	0	0	NA	0	0	NA	2	2	2.1162	1	1	1.2083	1	1	1.0551	2	2	1.3525	0	0	NA	0	0	NA	0	0	NA	0	0	NA	0	0	NA	0	0	NA	62.535
sp|P62701|RS4X_HUMAN;sp|Q8TD47|RS4Y2_HUMAN;sp|P22090|RS4Y1_HUMAN	0	0	NA	0	0	NA	0	0	NA	0	0	NA	11	11	0.87804	8	8	0.80122	7	7	1.2098	3	3	1.1322	3	3	0.44784	4	4	0.86369	5	5	0.72928	4	4	5.7541	2	2	2.5387	3	3	5.9502	218.44
sp|P62736|ACTA_HUMAN;sp|P63267|ACTH_HUMAN	7	0	NA	9	0	NA	8	0	NA	10	0	NA	14	0	NA	13	0	NA	12	0	NA	12	0	NA	12	0	NA	11	0	NA	11	0	NA	12	0	NA	10	0	NA	9	0	NA	-2
sp|P62750|RL23A_HUMAN	0	0	NA	0	0	NA	0	0	NA	0	0	NA	0	0	NA	0	0	NA	0	0	NA	0	0	NA	0	0	NA	0	0	NA	1	1	NA	1	1	0.83978	1	1	NA	1	1	0.97463	24.859
sp|P62753|RS6_HUMAN	0	0	NA	0	0	NA	0	0	NA	1	1	0.79612	4	4	1.35	4	4	1.4666	6	6	0.98822	5	5	0.69306	4	4	1.1102	2	2	0.61503	4	4	0.2352	5	5	23.606	5	5	0.89047	5	5	2.0365	275.78
sp|P62805|H4_HUMAN	8	8	0.41687	7	7	4.596	10	10	0.73631	9	9	0.72679	9	9	2.6281	10	10	3.1931	11	11	1.5398	10	10	1.7374	11	11	2.4755	10	10	1.4931	10	10	0.89969	9	9	9.8394	10	10	2.2908	9	9	4.9048	323.31
sp|P62826|RAN_HUMAN	1	1	1.3019	0	0	NA	1	1	0.67064	2	2	0.99583	6	6	0.86145	5	5	0.68298	4	4	1.9344	3	3	1.8592	5	5	0.68808	2	2	1.524	0	0	NA	0	0	NA	0	0	NA	0	0	NA	61.406
sp|P62829|RL23_HUMAN	2	2	0.32806	2	2	2.481	1	1	0.50413	1	1	0.7427	4	4	0.5973	4	4	0.56316	4	4	0.63607	3	3	0.48202	3	3	0.48547	4	4	0.51135	2	2	0.49739	4	4	6.9745	1	1	1.4755	1	1	3.7281	126.58
sp|P62841|RS15_HUMAN	0	0	NA	0	0	NA	0	0	NA	0	0	NA	0	0	NA	0	0	NA	0	0	NA	0	0	NA	0	0	NA	0	0	NA	0	0	NA	0	0	NA	0	0	NA	0	0	NA	4.0715
sp|P62847|RS24_HUMAN	0	0	NA	0	0	NA	0	0	NA	0	0	NA	1	1	0.77416	1	1	0.67162	1	1	0.96272	1	1	0.60525	1	1	0.59256	0	0	NA	0	0	NA	0	0	NA	0	0	NA	0	0	NA	53.342
sp|P62851|RS25_HUMAN	0	0	NA	0	0	NA	0	0	NA	0	0	NA	1	1	1.7443	0	0	NA	1	1	0.47362	0	0	NA	1	1	0.993	1	1	0.39912	4	4	0.83488	2	2	7.4993	3	3	2.9763	2	2	6.3271	22.206
sp|P62854|RS26_HUMAN;sp|Q5JNZ5|RS26L_HUMAN	1	1	0.68936	0	0	NA	0	0	NA	0	0	NA	2	2	1.1886	1	1	1.0264	1	1	0.8122	2	2	0.72588	2	2	0.79068	0	0	NA	0	0	NA	0	0	NA	0	0	NA	0	0	NA	35.39
sp|P62857|RS28_HUMAN	0	0	NA	0	0	NA	0	0	NA	0	0	NA	0	0	NA	0	0	NA	0	0	NA	0	0	NA	0	0	NA	0	0	NA	0	0	NA	0	0	NA	0	0	NA	0	0	NA	10.505
sp|P62873|GBB1_HUMAN;sp|P16520|GBB3_HUMAN	0	0	NA	0	0	NA	0	0	NA	0	0	NA	2	2	0.61202	5	5	0.5802	3	3	2.1241	1	1	1.8265	2	2	0.63741	1	1	1.5213	0	0	NA	0	0	NA	0	0	NA	0	0	NA	57.936
sp|P62879|GBB2_HUMAN	0	0	NA	0	0	NA	0	0	NA	1	1	NA	3	2	0.57433	4	1	0.43668	2	1	1.5941	1	0	NA	1	0	NA	2	1	2.6271	0	0	NA	0	0	NA	0	0	NA	0	0	NA	19.836
sp|P62888|RL30_HUMAN	2	2	0.70216	2	2	1.2999	3	3	1.2801	4	4	0.42194	4	4	2.2604	3	3	2.0336	5	5	0.52988	2	2	0.47688	4	4	1.9028	5	5	0.54129	4	4	0.85219	3	3	27.166	4	4	3.2981	4	4	9.1145	229.91
sp|P62899|RL31_HUMAN	0	0	NA	0	0	NA	0	0	NA	0	0	NA	0	0	NA	0	0	NA	0	0	NA	0	0	NA	1	1	0.6124	1	1	NA	1	1	0.2945	1	1	NA	0	0	NA	0	0	NA	13.439
sp|P62906|RL10A_HUMAN	2	2	0.48639	5	5	1.4361	5	5	4.6886	5	5	0.083568	7	7	1.9261	5	5	1.8746	9	9	0.52498	8	8	0.50093	8	8	1.6199	10	10	0.51002	8	8	0.85566	8	8	9.3694	8	8	2.9308	9	9	6.2232	323.31
sp|P62910|RL32_HUMAN	0	0	NA	0	0	NA	0	0	NA	0	0	NA	2	2	1.9564	1	1	2.1181	4	4	0.52321	1	1	0.5051	2	2	1.6881	4	4	0.40531	2	2	0.70821	3	3	25.686	1	1	1.4367	2	2	6.0574	234.09
sp|P62913|RL11_HUMAN	2	2	0.28537	2	2	2.902	1	1	0.85862	1	1	0.68328	4	4	1.8983	3	3	1.6549	5	5	0.56628	4	4	0.5827	3	3	1.4868	5	5	0.49142	4	4	0.8687	3	3	10.069	4	4	4.347	3	3	5.8276	241.16
sp|P62917|RL8_HUMAN	0	0	NA	1	1	NA	3	3	0.96723	2	2	0.83482	11	11	2.0364	7	7	2.0902	10	10	0.488	7	7	0.51666	4	4	1.8248	7	7	0.54456	6	6	0.89912	4	4	41.437	7	7	3.4271	4	4	14.67	120.7
sp|P62937|PPIA_HUMAN;tr|A0A075B767|A0A075B767_HUMAN;sp|Q9Y536|PAL4A_HUMAN;sp|P0DN26|PAL4F_HUMAN;sp|F5H284|PAL4D_HUMAN;sp|A0A0B4J2A2|PAL4C_HUMAN;sp|A0A075B759|PAL4E_HUMAN;sp|P0DN37|PAL4G_HUMAN	0	0	NA	0	0	NA	0	0	NA	0	0	NA	3	3	0.58987	0	0	NA	1	1	2.4827	0	0	NA	3	3	0.46458	0	0	NA	0	0	NA	0	0	NA	0	0	NA	0	0	NA	21.105
sp|P62979|RS27A_HUMAN;sp|P62987|RL40_HUMAN;sp|P0CG47|UBB_HUMAN;sp|P0CG48|UBC_HUMAN	5	5	0.2269	5	5	2.6555	5	5	0.58291	5	5	0.60512	9	9	1.5787	9	9	1.4556	8	8	1.7977	9	9	1.5988	5	5	1.2467	5	5	1.5713	4	4	0.75074	4	4	12.897	5	5	1.7773	4	4	5.3878	323.31
sp|P62995|TRA2B_HUMAN	5	5	0.46887	3	3	1.3878	10	10	0.44569	13	13	0.70204	9	9	1.4003	7	7	1.2261	11	11	0.26234	9	9	0.18387	3	3	1.0631	6	6	0.28073	15	15	0.3579	16	16	33.14	15	15	1.2177	15	15	3.7325	323.31
sp|P63010|AP2B1_HUMAN	0	0	NA	0	0	NA	0	0	NA	0	0	NA	3	1	NA	2	0	NA	0	0	NA	1	0	NA	1	0	NA	1	0	NA	0	0	NA	0	0	NA	0	0	NA	0	0	NA	5.5402
sp|P63104|1433Z_HUMAN	2	1	1.2526	1	1	2.2188	2	1	0.77445	1	0	NA	6	5	0.81702	7	5	0.73767	7	6	1.1734	4	2	1.0952	7	5	0.62332	5	3	1.0241	1	0	NA	1	0	NA	1	0	NA	1	0	NA	323.31
sp|P63151|2ABA_HUMAN;sp|Q66LE6|2ABD_HUMAN;sp|Q00005|2ABB_HUMAN;sp|Q9Y2T4|2ABG_HUMAN	0	0	NA	0	0	NA	0	0	NA	1	1	0.82302	4	4	0.65405	2	2	0.47474	3	3	1.304	2	2	1.4822	3	3	1.0674	0	0	NA	0	0	NA	0	0	NA	0	0	NA	0	0	NA	29.407
sp|P63167|DYL1_HUMAN	0	0	NA	0	0	NA	1	1	0.61326	1	1	0.60906	0	0	NA	0	0	NA	0	0	NA	0	0	NA	0	0	NA	0	0	NA	1	1	0.45633	1	1	NA	1	1	2.4507	1	1	5.3823	20.194
sp|P63173|RL38_HUMAN	1	1	0.23572	0	0	NA	2	2	0.75509	3	3	0.7601	1	1	0.53077	1	1	0.3873	1	1	0.49947	1	1	0.47827	2	2	0.42445	2	2	0.42346	0	0	NA	1	1	NA	0	0	NA	1	1	NA	16.729
sp|P63241|IF5A1_HUMAN;sp|Q6IS14|IF5AL_HUMAN;sp|Q9GZV4|IF5A2_HUMAN	0	0	NA	0	0	NA	0	0	NA	0	0	NA	0	0	NA	0	0	NA	0	0	NA	0	0	NA	0	0	NA	0	0	NA	0	0	NA	0	0	NA	0	0	NA	0	0	NA	14.36
sp|P63244|RACK1_HUMAN	0	0	NA	0	0	NA	2	2	0.59133	2	2	0.97711	12	12	0.85974	11	11	0.72891	9	9	2.2491	6	6	2.2976	8	8	0.8013	7	7	1.825	9	9	0.77604	4	4	9.3279	4	4	2.9816	8	8	5.3783	323.31
sp|P63261|ACTG_HUMAN	13	1	0.77408	16	1	2.7603	13	0	NA	17	1	1.208	22	1	0.65181	22	1	0.58058	21	1	1.7765	21	1	1.3002	20	1	0.49395	18	1	1.5803	14	0	NA	14	0	NA	13	0	NA	12	0	NA	109.65
sp|P67775|PP2AA_HUMAN;sp|P62714|PP2AB_HUMAN;tr|E5RI56|E5RI56_HUMAN	0	0	NA	0	0	NA	1	1	0.73471	1	1	0.89537	0	0	NA	2	2	1.1019	0	0	NA	1	1	1.7102	1	1	NA	0	0	NA	0	0	NA	0	0	NA	0	0	NA	0	0	NA	54.388
sp|P67809|YBOX1_HUMAN	7	7	0.44773	10	10	0.98377	11	11	0.82718	14	14	0.32096	15	15	1.4566	17	17	1.4015	19	19	0.4691	16	16	0.39245	12	12	1.5074	14	14	0.50868	13	13	0.128	6	6	27.131	11	11	0.71628	8	8	2.4304	323.31
sp|P67936|TPM4_HUMAN;sp|P09493|TPM1_HUMAN	0	0	NA	0	0	NA	0	0	NA	0	0	NA	0	0	NA	0	0	NA	0	0	NA	0	0	NA	0	0	NA	0	0	NA	0	0	NA	0	0	NA	0	0	NA	0	0	NA	143.18
sp|P68032|ACTC_HUMAN;sp|P68133|ACTS_HUMAN	8	1	0.94351	10	1	3.4383	8	1	0.81051	11	1	1.1283	15	3	0.56279	14	2	0.50643	13	1	1.6895	13	1	1.308	13	2	0.44865	12	1	1.4882	12	1	0.56512	13	2	5.9736	11	1	1.2659	10	1	2.6872	48.154
sp|P68104|EF1A1_HUMAN;sp|Q5VTE0|EF1A3_HUMAN;sp|Q05639|EF1A2_HUMAN	5	5	1.2134	3	3	1.8404	7	7	0.59552	6	6	0.76177	10	10	1.1982	10	10	0.95394	10	10	1.577	8	8	1.415	8	8	0.92818	8	8	1.7828	5	5	0.3314	6	6	3.1847	2	2	1.4098	4	4	2.9536	323.31
sp|P68363|TBA1B_HUMAN	16	16	0.33071	17	17	3.0221	16	16	0.62067	19	19	0.85	26	26	0.62018	23	23	0.55705	20	20	0.93147	21	21	0.74986	21	21	0.51209	20	20	0.91091	12	12	1.3684	14	14	9.2016	13	13	3.9086	13	13	6.8792	323.31
sp|P68366|TBA4A_HUMAN	13	0	NA	13	0	NA	13	1	0.63599	16	1	0.85611	20	1	0.48476	18	1	0.55057	17	1	0.68569	18	1	0.7764	17	1	0.48457	16	1	0.86712	8	0	NA	10	0	NA	9	0	NA	9	0	NA	30.403
sp|P68371|TBB4B_HUMAN;sp|A6NNZ2|TBB8L_HUMAN	18	18	0.34902	23	23	3.2193	20	20	0.64746	23	23	0.89665	27	27	0.57701	27	27	0.50231	26	26	0.92811	26	26	0.74793	25	25	0.46039	22	22	0.90906	13	13	1.1503	11	11	9.5752	10	10	3.0434	9	9	6.8032	323.31
sp|P68431|H31_HUMAN	3	0	NA	2	0	NA	4	0	NA	3	0	NA	5	0	NA	4	0	NA	4	0	NA	5	0	NA	3	0	NA	2	0	NA	5	0	NA	3	0	NA	5	0	NA	4	0	NA	9.9938
sp|P68871|HBB_HUMAN;sp|P02042|HBD_HUMAN;CON__P02070;sp|P69891|HBG1_HUMAN;sp|P02100|HBE_HUMAN;CON__Q3SX09	0	0	NA	0	0	NA	0	0	NA	0	0	NA	0	0	NA	0	0	NA	0	0	NA	0	0	NA	0	0	NA	0	0	NA	0	0	NA	0	0	NA	0	0	NA	0	0	NA	2.8211
sp|P69905|HBA_HUMAN	0	0	NA	0	0	NA	0	0	NA	0	0	NA	0	0	NA	0	0	NA	0	0	NA	0	0	NA	0	0	NA	0	0	NA	0	0	NA	0	0	NA	0	0	NA	0	0	NA	2.3082
sp|P78316|NOP14_HUMAN	0	0	NA	0	0	NA	0	0	NA	0	0	NA	1	1	1.0899	0	0	NA	1	1	NA	2	2	0.77563	1	1	0.91767	2	2	0.71202	2	2	0.82096	0	0	NA	0	0	NA	1	1	2.3585	58.309
sp|P78344|IF4G2_HUMAN	0	0	NA	0	0	NA	0	0	NA	0	0	NA	1	1	1.4403	0	0	NA	0	0	NA	0	0	NA	1	1	0.97694	0	0	NA	0	0	NA	0	0	NA	0	0	NA	0	0	NA	40.344
sp|P78346|RPP30_HUMAN	0	0	NA	0	0	NA	0	0	NA	0	0	NA	0	0	NA	0	0	NA	1	1	1.0723	0	0	NA	0	0	NA	0	0	NA	0	0	NA	0	0	NA	0	0	NA	0	0	NA	8.3411
sp|P78347|GTF2I_HUMAN;sp|Q6EKJ0|GTD2B_HUMAN	0	0	NA	0	0	NA	2	2	0.66561	0	0	NA	21	21	0.50578	20	20	0.4347	21	21	0.53305	19	19	0.46379	13	13	0.46384	14	14	0.46227	0	0	NA	0	0	NA	0	0	NA	0	0	NA	235.87
sp|P78371|TCPB_HUMAN	0	0	NA	1	1	0.7625	2	2	0.59614	3	3	0.92029	11	11	0.67405	12	12	0.59688	7	7	1.7327	6	6	1.3396	8	8	0.50831	6	6	1.4642	0	0	NA	0	0	NA	0	0	NA	0	0	NA	81.067
sp|P78406|RAE1L_HUMAN	0	0	NA	0	0	NA	0	0	NA	0	0	NA	0	0	NA	0	0	NA	1	1	0.72643	0	0	NA	0	0	NA	0	0	NA	0	0	NA	0	0	NA	0	0	NA	0	0	NA	2.6322
sp|P78527|PRKDC_HUMAN	5	5	0.4437	8	8	2.7196	9	9	0.58067	9	9	0.84712	110	110	0.5738	104	104	0.54875	103	103	0.5983	94	94	0.47066	70	70	0.52804	83	83	0.54069	0	0	NA	3	3	NA	0	0	NA	1	1	NA	323.31
sp|P78549|NTH_HUMAN	0	0	NA	0	0	NA	0	0	NA	0	0	NA	0	0	NA	1	1	NA	0	0	NA	0	0	NA	0	0	NA	1	1	NA	0	0	NA	0	0	NA	0	0	NA	0	0	NA	90.68
sp|P81605|DCD_HUMAN	0	0	NA	0	0	NA	2	2	0.1445	0	0	NA	1	1	0.22659	0	0	NA	2	2	0.089338	3	3	0.075651	1	1	0.17164	2	2	0.0875	0	0	NA	1	1	NA	0	0	NA	0	0	NA	83.03
sp|P82650|RT22_HUMAN	0	0	NA	0	0	NA	5	5	0.6123	5	5	0.86573	4	4	1.1246	1	1	1.2037	3	3	0.58601	0	0	NA	1	1	0.93374	3	3	0.63777	0	0	NA	0	0	NA	0	0	NA	1	1	1.8166	167.4
sp|P82663|RT25_HUMAN	0	0	NA	0	0	NA	0	0	NA	0	0	NA	0	0	NA	0	0	NA	0	0	NA	0	0	NA	0	0	NA	0	0	NA	0	0	NA	0	0	NA	0	0	NA	0	0	NA	64.927
sp|P82664|RT10_HUMAN	0	0	NA	0	0	NA	0	0	NA	0	0	NA	0	0	NA	0	0	NA	0	0	NA	0	0	NA	0	0	NA	0	0	NA	0	0	NA	0	0	NA	0	0	NA	0	0	NA	6.3386
sp|P82673|RT35_HUMAN	0	0	NA	0	0	NA	1	1	0.81581	2	2	0.6458	1	1	NA	0	0	NA	0	0	NA	0	0	NA	1	1	0.91656	1	1	0.55921	0	0	NA	0	0	NA	0	0	NA	0	0	NA	14.682
sp|P82675|RT05_HUMAN	0	0	NA	0	0	NA	0	0	NA	1	1	0.93853	1	1	0.73396	2	2	0.80362	1	1	0.80104	2	2	0.58163	0	0	NA	1	1	0.49884	0	0	NA	0	0	NA	0	0	NA	0	0	NA	14.143
sp|P82930|RT34_HUMAN	0	0	NA	0	0	NA	2	2	0.73155	3	3	0.81863	0	0	NA	0	0	NA	0	0	NA	0	0	NA	1	1	0.91775	0	0	NA	0	0	NA	1	1	NA	1	1	NA	0	0	NA	14.779
sp|P82932|RT06_HUMAN	0	0	NA	0	0	NA	0	0	NA	0	0	NA	1	1	1.0404	0	0	NA	0	0	NA	0	0	NA	0	0	NA	0	0	NA	0	0	NA	0	0	NA	0	0	NA	0	0	NA	1.9932
sp|P82933|RT09_HUMAN	0	0	NA	0	0	NA	0	0	NA	0	0	NA	3	3	0.90874	3	3	0.68669	4	4	0.81629	2	2	0.71298	3	3	0.97096	2	2	0.79773	0	0	NA	0	0	NA	0	0	NA	0	0	NA	132.94
sp|P82979|SARNP_HUMAN;tr|H0YHG0|H0YHG0_HUMAN	0	0	NA	0	0	NA	0	0	NA	0	0	NA	0	0	NA	0	0	NA	0	0	NA	0	0	NA	0	0	NA	0	0	NA	7	7	0.047865	7	7	11.227	10	10	0.49076	11	11	2.1533	323.31
sp|P83731|RL24_HUMAN	1	1	0.32107	2	2	2.6008	4	4	0.74315	3	3	0.9062	4	4	0.69281	6	6	0.59871	5	5	0.73223	5	5	0.6578	3	3	0.58553	3	3	0.60242	3	3	0.60399	2	2	9.0168	4	4	1.3443	2	2	3.2454	79.543
sp|Q969Q0|RL36L_HUMAN;sp|P83881|RL36A_HUMAN;tr|H7BZ11|H7BZ11_HUMAN	0	0	NA	0	0	NA	0	0	NA	0	0	NA	1	1	1.462	1	1	1.4053	1	1	0.89096	1	1	1.0361	1	1	1.2379	1	1	0.73842	1	1	NA	0	0	NA	0	0	NA	0	0	NA	4.6702
sp|P83916|CBX1_HUMAN	0	0	NA	0	0	NA	0	0	NA	0	0	NA	0	0	NA	0	0	NA	0	0	NA	0	0	NA	0	0	NA	0	0	NA	0	0	NA	0	0	NA	0	0	NA	0	0	NA	-2
sp|P84090|ERH_HUMAN	0	0	NA	1	1	2.1434	4	4	0.51163	5	5	0.66171	2	2	0.39096	1	1	1.0489	3	3	0.14593	0	0	NA	3	3	0.45522	3	3	0.22884	7	7	0.17848	7	7	9.8547	5	5	0.82927	5	5	3.5658	323.31
sp|P84098|RL19_HUMAN	0	0	NA	0	0	NA	0	0	NA	1	1	0.62223	4	4	2.3226	3	3	2.0232	6	6	0.64141	5	5	0.60741	2	2	1.7692	5	5	0.58476	4	4	0.16153	7	7	9.1463	5	5	0.37412	6	6	0.67956	323.31
sp|P84103|SRSF3_HUMAN	1	0	NA	0	0	NA	3	2	0.71716	4	3	0.43338	2	2	0.7818	1	1	0.90601	4	3	0.21101	1	1	0.32292	2	2	0.98324	3	2	0.39644	9	8	0.066727	9	8	11.28	9	8	0.27913	9	8	1.3309	201.72
sp|P84157|MXRA7_HUMAN	0	0	NA	0	0	NA	0	0	NA	0	0	NA	0	0	NA	0	0	NA	0	0	NA	0	0	NA	0	0	NA	0	0	NA	0	0	NA	0	0	NA	0	0	NA	0	0	NA	35.29
sp|P84243|H33_HUMAN	3	0	NA	2	0	NA	4	0	NA	3	0	NA	5	0	NA	4	0	NA	4	0	NA	5	0	NA	3	0	NA	2	0	NA	5	0	NA	3	0	NA	5	0	NA	4	0	NA	22.715
sp|P98175|RBM10_HUMAN	0	0	NA	0	0	NA	0	0	NA	0	0	NA	0	0	NA	0	0	NA	0	0	NA	0	0	NA	0	0	NA	0	0	NA	2	2	0.25534	0	0	NA	0	0	NA	1	1	5.4969	323.31
sp|Q00169|PIPNA_HUMAN	0	0	NA	0	0	NA	0	0	NA	0	0	NA	0	0	NA	0	0	NA	0	0	NA	0	0	NA	0	0	NA	0	0	NA	0	0	NA	0	0	NA	0	0	NA	0	0	NA	67.073
sp|Q00325|MPCP_HUMAN	1	1	0.45332	2	2	2.9905	3	3	0.63009	3	3	0.77098	8	8	0.61269	5	5	0.57716	6	6	0.5957	7	7	0.5055	5	5	0.60717	5	5	0.56425	0	0	NA	0	0	NA	0	0	NA	0	0	NA	219.72
sp|Q00341|VIGLN_HUMAN	0	0	NA	0	0	NA	0	0	NA	0	0	NA	1	1	NA	1	1	1.1919	1	1	NA	1	1	1.3599	0	0	NA	1	1	1.9113	0	0	NA	0	0	NA	0	0	NA	0	0	NA	54.585
sp|Q00403|TF2B_HUMAN	0	0	NA	0	0	NA	0	0	NA	0	0	NA	0	0	NA	0	0	NA	0	0	NA	0	0	NA	0	0	NA	0	0	NA	0	0	NA	0	0	NA	0	0	NA	0	0	NA	6.7752
sp|Q00535|CDK5_HUMAN	0	0	NA	0	0	NA	0	0	NA	0	0	NA	1	0	NA	1	0	NA	1	0	NA	1	0	NA	0	0	NA	0	0	NA	0	0	NA	0	0	NA	0	0	NA	0	0	NA	37.07
sp|Q00577|PURA_HUMAN	4	4	0.09327	2	2	4.19	4	4	0.47749	3	3	0.6156	6	6	1.8415	6	6	2.0363	4	4	3.7803	5	5	3.3809	4	4	1.9499	3	3	3.166	1	1	1.5208	1	1	7.9362	1	1	2.976	2	2	2.3576	225.51
sp|Q00610|CLH1_HUMAN;sp|P53675|CLH2_HUMAN	1	1	1.2049	2	2	2.7195	1	1	0.66376	1	1	0.81308	36	36	0.72061	39	39	0.59078	35	35	1.2354	24	24	1.0101	25	25	0.544	19	19	0.97186	0	0	NA	1	1	NA	0	0	NA	0	0	NA	323.31
sp|Q00688|FKBP3_HUMAN	0	0	NA	0	0	NA	0	0	NA	0	0	NA	0	0	NA	0	0	NA	0	0	NA	0	0	NA	0	0	NA	0	0	NA	0	0	NA	0	0	NA	0	0	NA	0	0	NA	9.3608
sp|Q00839|HNRPU_HUMAN	8	8	1.2463	6	6	1.6756	11	11	0.64049	19	19	0.61527	29	29	0.96942	30	30	0.87722	26	26	0.81406	32	32	0.70511	23	23	0.85775	22	22	0.80284	14	14	0.37291	12	12	11.022	13	13	1.1972	12	12	2.983	323.31
sp|Q01082|SPTB2_HUMAN;sp|P11277|SPTB1_HUMAN	0	0	NA	0	0	NA	0	0	NA	0	0	NA	0	0	NA	0	0	NA	0	0	NA	0	0	NA	1	1	NA	0	0	NA	0	0	NA	0	0	NA	0	0	NA	0	0	NA	321.12
sp|Q01085|TIAR_HUMAN	0	0	NA	0	0	NA	0	0	NA	0	0	NA	1	1	0.93347	1	1	0.95967	2	2	0.93029	1	1	0.74048	1	1	1.8171	0	0	NA	0	0	NA	1	1	5.248	0	0	NA	0	0	NA	124.06
sp|Q01105|SET_HUMAN	0	0	NA	0	0	NA	0	0	NA	0	0	NA	0	0	NA	0	0	NA	0	0	NA	0	0	NA	0	0	NA	1	1	1.0597	0	0	NA	0	0	NA	0	0	NA	0	0	NA	190.11
sp|Q01130|SRSF2_HUMAN	0	0	NA	0	0	NA	0	0	NA	0	0	NA	0	0	NA	0	0	NA	1	1	NA	0	0	NA	0	0	NA	1	1	NA	4	4	0.11889	3	3	7.554	4	4	0.4733	3	3	1.8052	105.99
sp|Q01469|FABP5_HUMAN	0	0	NA	0	0	NA	0	0	NA	0	0	NA	0	0	NA	0	0	NA	0	0	NA	0	0	NA	1	1	0.5337	0	0	NA	0	0	NA	0	0	NA	0	0	NA	0	0	NA	6.0855
sp|Q01518|CAP1_HUMAN	0	0	NA	0	0	NA	0	0	NA	0	0	NA	2	2	0.68843	2	2	0.81464	0	0	NA	0	0	NA	1	1	NA	0	0	NA	0	0	NA	0	0	NA	0	0	NA	0	0	NA	139.62
sp|Q01546|K22O_HUMAN;CON__Q01546	4	0	NA	7	0	NA	3	0	NA	8	0	NA	7	0	NA	2	0	NA	5	0	NA	4	0	NA	5	0	NA	3	0	NA	5	0	NA	6	0	NA	5	0	NA	5	0	NA	-2	+
sp|Q01650|LAT1_HUMAN	0	0	NA	0	0	NA	0	0	NA	0	0	NA	1	1	0.50187	1	1	NA	0	0	NA	0	0	NA	0	0	NA	0	0	NA	0	0	NA	0	0	NA	0	0	NA	0	0	NA	20.529
sp|Q01804|OTUD4_HUMAN	0	0	NA	0	0	NA	0	0	NA	0	0	NA	1	1	NA	1	1	NA	1	1	NA	0	0	NA	0	0	NA	1	1	NA	5	5	0.31164	10	10	5.4922	9	9	0.66546	6	6	1.6407	66.312
sp|Q01813|PFKAP_HUMAN	0	0	NA	0	0	NA	0	0	NA	0	0	NA	1	0	NA	1	0	NA	2	0	NA	1	0	NA	0	0	NA	0	0	NA	0	0	NA	0	0	NA	0	0	NA	0	0	NA	-2
sp|Q01831|XPC_HUMAN	3	3	0.34342	1	1	3.6331	1	1	0.44172	2	2	0.4386	4	4	1.642	4	4	1.3362	3	3	1.3948	3	3	1.1207	8	8	1.5336	4	4	2.2262	0	0	NA	0	0	NA	0	0	NA	0	0	NA	107.07
sp|Q01844|EWS_HUMAN	0	0	NA	0	0	NA	0	0	NA	0	0	NA	0	0	NA	1	1	0.79246	0	0	NA	1	1	NA	0	0	NA	0	0	NA	0	0	NA	0	0	NA	0	0	NA	0	0	NA	57.621
sp|Q02040|AK17A_HUMAN	0	0	NA	0	0	NA	0	0	NA	0	0	NA	0	0	NA	0	0	NA	0	0	NA	0	0	NA	0	0	NA	0	0	NA	1	1	0.30425	0	0	NA	0	0	NA	1	1	7.469	5.4448
sp|Q02224|CENPE_HUMAN	0	0	NA	0	0	NA	0	0	NA	0	0	NA	1	1	NA	0	0	NA	0	0	NA	0	0	NA	0	0	NA	0	0	NA	0	0	NA	0	0	NA	0	0	NA	0	0	NA	-2
sp|Q02413|DSG1_HUMAN	0	0	NA	0	0	NA	2	2	0.3154	3	3	0.18589	2	2	0.4008	0	0	NA	0	0	NA	5	5	0.74712	2	2	0.28395	5	5	0.060265	0	0	NA	3	3	0.50241	0	0	NA	0	0	NA	191.38
sp|Q02543|RL18A_HUMAN	0	0	NA	1	1	1.5605	1	1	0.79201	5	5	0.9727	7	7	1.9823	5	5	1.9745	12	12	0.59771	7	7	0.51655	7	7	1.8743	10	10	0.54174	6	6	0.71117	8	8	22.811	8	8	1.7256	6	6	3.3896	218.1
sp|Q02790|FKBP4_HUMAN	5	5	0.35813	2	2	2.4848	3	3	0.7331	5	5	0.86881	15	15	0.45963	14	14	0.38481	7	7	0.95335	10	10	0.86054	8	8	0.40426	1	1	NA	0	0	NA	0	0	NA	0	0	NA	0	0	NA	298.31
sp|Q02846|GUC2D_HUMAN	0	0	NA	0	0	NA	0	0	NA	0	0	NA	0	0	NA	0	0	NA	0	0	NA	0	0	NA	0	0	NA	0	0	NA	0	0	NA	0	0	NA	0	0	NA	0	0	NA	-2
sp|Q02878|RL6_HUMAN	2	2	0.26979	3	3	5.2006	1	1	0.62574	1	1	1.0266	12	12	2.1012	14	14	2.0861	17	17	0.58477	15	15	0.56262	12	12	1.8268	13	13	0.54975	11	11	0.66475	12	12	10.252	12	12	1.6695	10	10	3.581	323.31
sp|Q02880|TOP2B_HUMAN	0	0	NA	0	0	NA	0	0	NA	1	1	0.7376	9	6	0.692	11	7	0.57778	11	6	0.9801	7	4	0.57732	9	6	0.55278	6	4	0.67169	0	0	NA	0	0	NA	0	0	NA	0	0	NA	41.272
sp|Q02978|M2OM_HUMAN	0	0	NA	1	1	2.8514	5	5	0.66265	3	3	0.81657	7	7	0.46705	6	6	0.48806	5	5	0.50022	6	6	0.41589	4	4	0.34728	4	4	0.39323	0	0	NA	0	0	NA	0	0	NA	0	0	NA	283.06
sp|Q03135|CAV1_HUMAN	0	0	NA	0	0	NA	0	0	NA	0	0	NA	0	0	NA	0	0	NA	0	0	NA	0	0	NA	0	0	NA	0	0	NA	1	1	2.3263	1	1	7.0459	1	1	3.144	1	1	6.5985	2.4254
sp|Q03252|LMNB2_HUMAN	0	0	NA	0	0	NA	1	0	NA	0	0	NA	2	1	0.48651	3	2	0.38676	3	2	NA	1	1	0.49616	2	2	NA	1	1	0.37593	0	0	NA	0	0	NA	0	0	NA	0	0	NA	20.635
sp|Q03701|CEBPZ_HUMAN	0	0	NA	0	0	NA	0	0	NA	1	1	0.7615	4	4	1.2055	2	2	2.2264	9	9	0.5858	3	3	1.0616	3	3	1.1845	5	5	0.5023	1	1	0.53897	0	0	NA	0	0	NA	0	0	NA	96.645
sp|Q04323|UBXN1_HUMAN	0	0	NA	0	0	NA	0	0	NA	0	0	NA	0	0	NA	0	0	NA	1	1	1.2092	0	0	NA	0	0	NA	0	0	NA	0	0	NA	0	0	NA	0	0	NA	0	0	NA	2.0334
sp|Q04446|GLGB_HUMAN	0	0	NA	0	0	NA	0	0	NA	0	0	NA	0	0	NA	1	1	NA	2	2	0.26451	0	0	NA	0	0	NA	0	0	NA	0	0	NA	0	0	NA	0	0	NA	0	0	NA	6.582
sp|Q04637|IF4G1_HUMAN;REV__sp|Q8NEG2|CG057_HUMAN	0	0	NA	0	0	NA	0	0	NA	0	0	NA	3	3	1.1606	5	5	1.3426	2	2	1.2679	2	2	2.188	2	2	1.0589	1	1	1.1364	0	0	NA	0	0	NA	0	0	NA	0	0	NA	115.96
sp|Q04726|TLE3_HUMAN;sp|Q04725|TLE2_HUMAN	0	0	NA	0	0	NA	0	0	NA	0	0	NA	1	1	NA	1	1	1.7353	0	0	NA	1	1	NA	1	1	0.74043	0	0	NA	0	0	NA	0	0	NA	0	0	NA	0	0	NA	9.4843
sp|Q04760|LGUL_HUMAN	0	0	NA	0	0	NA	0	0	NA	0	0	NA	0	0	NA	0	0	NA	0	0	NA	0	0	NA	0	0	NA	0	0	NA	0	0	NA	0	0	NA	0	0	NA	0	0	NA	3.4248
sp|Q04837|SSBP_HUMAN	6	6	0.11729	9	9	4.8456	8	8	0.56052	9	9	0.7847	8	8	1.0821	8	8	1.1573	6	6	2.0832	5	5	2.2716	5	5	0.93384	4	4	2.3205	1	1	1.7349	1	1	NA	1	1	1.8977	2	2	3.3507	323.31
sp|Q04917|1433F_HUMAN	1	0	NA	0	0	NA	1	0	NA	1	0	NA	1	0	NA	2	0	NA	2	1	NA	2	0	NA	2	0	NA	2	0	NA	1	0	NA	1	0	NA	1	0	NA	1	0	NA	-2
sp|Q05086|UBE3A_HUMAN	0	0	NA	0	0	NA	0	0	NA	0	0	NA	1	1	0.62555	0	0	NA	1	1	0.84985	1	1	0.78182	0	0	NA	0	0	NA	0	0	NA	0	0	NA	0	0	NA	0	0	NA	3.0114
sp|Q05519|SRS11_HUMAN	0	0	NA	0	0	NA	0	0	NA	0	0	NA	0	0	NA	0	0	NA	0	0	NA	0	0	NA	0	0	NA	0	0	NA	0	0	NA	1	1	NA	0	0	NA	0	0	NA	7.5207
sp|Q06203|PUR1_HUMAN	0	0	NA	0	0	NA	0	0	NA	0	0	NA	3	3	0.58998	2	2	0.52876	1	1	1.6202	0	0	NA	1	1	NA	0	0	NA	0	0	NA	0	0	NA	0	0	NA	0	0	NA	10.879
sp|Q06323|PSME1_HUMAN	0	0	NA	0	0	NA	0	0	NA	0	0	NA	0	0	NA	0	0	NA	0	0	NA	0	0	NA	0	0	NA	0	0	NA	0	0	NA	0	0	NA	0	0	NA	0	0	NA	5.9822
sp|Q06787|FMR1_HUMAN	1	1	0.13665	3	3	5.143	5	5	0.51981	9	9	0.71919	3	3	1.1801	0	0	NA	9	9	0.1645	2	2	0.9111	1	1	0.33577	8	8	0.17439	28	28	0.2135	24	24	36.638	24	24	0.97178	20	20	5.0351	323.31
sp|Q06830|PRDX1_HUMAN	0	0	NA	1	1	5.2073	6	6	0.54594	5	5	0.74464	7	7	0.81601	5	5	0.79749	5	5	1.7015	3	3	1.3381	7	7	0.6181	3	3	1.3567	2	2	0.33723	6	6	2.5889	4	4	0.89163	4	4	2.7199	75.09
sp|Q07020|RL18_HUMAN	4	4	0.1819	3	3	7.1247	2	2	0.54165	1	1	1.3443	7	7	1.9702	5	5	1.8817	7	7	0.5499	7	7	0.54382	6	6	1.6979	6	6	0.54337	7	7	1.0541	6	6	15.845	7	7	3.3903	7	7	11.814	323.31
sp|Q07021|C1QBP_HUMAN	2	2	0.55016	0	0	NA	1	1	0.74495	1	1	0.75208	4	4	0.54922	2	2	0.4395	2	2	0.57505	3	3	0.56992	4	4	0.51398	5	5	0.45352	0	0	NA	0	0	NA	0	0	NA	0	0	NA	216.84
sp|Q07065|CKAP4_HUMAN	0	0	NA	0	0	NA	0	0	NA	0	0	NA	2	2	0.53362	1	1	0.50132	1	1	1.2814	1	1	1.213	0	0	NA	0	0	NA	0	0	NA	0	0	NA	0	0	NA	0	0	NA	15.951
sp|Q07157|ZO1_HUMAN	0	0	NA	0	0	NA	0	0	NA	0	0	NA	0	0	NA	0	0	NA	0	0	NA	0	0	NA	0	0	NA	0	0	NA	0	0	NA	0	0	NA	0	0	NA	0	0	NA	36.67
sp|Q07666|KHDR1_HUMAN;sp|Q5VWX1|KHDR2_HUMAN;sp|O75525|KHDR3_HUMAN	2	2	1.0596	0	0	NA	1	1	0.51827	3	3	0.66304	2	2	0.98218	3	3	0.95512	3	3	1.1712	2	2	1.0772	1	1	0.85136	0	0	NA	0	0	NA	1	1	NA	0	0	NA	0	0	NA	28.056
sp|Q07955|SRSF1_HUMAN	1	1	2.6569	0	0	NA	3	2	1.1292	1	0	NA	2	2	1.5016	0	0	NA	6	6	0.23237	0	0	NA	0	0	NA	2	2	0.56142	15	14	0.087824	11	11	41.12	15	14	0.41821	14	13	2.0313	323.31
sp|Q08043|ACTN3_HUMAN	0	0	NA	0	0	NA	0	0	NA	0	0	NA	1	0	NA	1	0	NA	1	0	NA	1	0	NA	2	0	NA	1	0	NA	1	0	NA	0	0	NA	0	0	NA	0	0	NA	2.2201
sp|Q08170|SRSF4_HUMAN	1	0	NA	0	0	NA	1	0	NA	0	0	NA	0	0	NA	0	0	NA	2	0	NA	1	0	NA	0	0	NA	2	0	NA	10	7	0.21801	8	4	8.5918	11	7	0.8182	10	6	3.3594	242.55
sp|Q08188|TGM3_HUMAN	0	0	NA	0	0	NA	0	0	NA	1	1	0.71517	0	0	NA	0	0	NA	0	0	NA	0	0	NA	0	0	NA	1	1	NA	0	0	NA	0	0	NA	1	1	NA	0	0	NA	17.787
sp|Q08211|DHX9_HUMAN	4	4	2.2964	1	1	1.6049	2	2	0.98911	2	2	0.66282	26	26	1.143	19	19	1.1995	25	25	1.4039	20	20	1.1883	18	18	0.96301	18	18	1.3245	10	10	0.58777	5	5	9.5569	8	8	2.0217	4	4	5.1129	323.31
sp|Q08257|QOR_HUMAN	0	0	NA	0	0	NA	0	0	NA	0	0	NA	0	0	NA	0	0	NA	0	0	NA	0	0	NA	0	0	NA	0	0	NA	0	0	NA	0	0	NA	0	0	NA	0	0	NA	19.03
sp|Q08554|DSC1_HUMAN	0	0	NA	1	1	0.13245	1	1	0.12631	2	2	0.063751	0	0	NA	0	0	NA	0	0	NA	0	0	NA	1	1	0.142	1	1	0.2439	0	0	NA	1	1	0.47582	0	0	NA	0	0	NA	14.101
sp|Q08945|SSRP1_HUMAN	4	4	0.32514	1	1	NA	7	7	0.57797	5	5	0.68236	12	12	1.2261	10	10	1.2039	11	11	1.2575	10	10	1.1851	8	8	1.2763	8	8	1.3539	1	1	0.32654	1	1	NA	0	0	NA	0	0	NA	323.31
sp|Q08J23|NSUN2_HUMAN	0	0	NA	0	0	NA	0	0	NA	0	0	NA	0	0	NA	1	1	NA	0	0	NA	0	0	NA	0	0	NA	0	0	NA	0	0	NA	0	0	NA	0	0	NA	0	0	NA	4.3187
sp|Q09028|RBBP4_HUMAN	1	1	NA	2	2	2.529	3	3	0.68878	3	3	1.0511	7	7	0.67296	5	5	0.66577	7	7	1.4702	5	5	1.5377	2	2	0.69094	3	3	1.3819	2	2	0.38613	1	1	8.5132	1	1	1.2411	1	1	4.3966	81.61
sp|Q09161|NCBP1_HUMAN	8	8	0.27558	6	6	3.2219	1	1	0.95174	8	8	0.47105	21	21	1.229	10	10	1.2257	27	27	0.3187	19	19	0.31912	15	15	1.2004	20	20	0.39769	20	20	1.2843	18	18	11.163	19	19	3.382	19	19	7.4355	323.31
sp|Q09666|AHNK_HUMAN	0	0	NA	0	0	NA	0	0	NA	0	0	NA	0	0	NA	0	0	NA	0	0	NA	0	0	NA	0	0	NA	0	0	NA	0	0	NA	0	0	NA	0	0	NA	0	0	NA	2.9064
sp|Q0VDF9|HSP7E_HUMAN	0	0	NA	0	0	NA	0	0	NA	0	0	NA	0	0	NA	0	0	NA	0	0	NA	0	0	NA	0	0	NA	0	0	NA	0	0	NA	0	0	NA	0	0	NA	0	0	NA	14.462
sp|Q0ZGT2|NEXN_HUMAN	0	0	NA	0	0	NA	0	0	NA	0	0	NA	0	0	NA	0	0	NA	0	0	NA	0	0	NA	0	0	NA	0	0	NA	0	0	NA	0	0	NA	0	0	NA	0	0	NA	10.238
sp|Q10567|AP1B1_HUMAN	0	0	NA	0	0	NA	0	0	NA	0	0	NA	2	2	0.63385	2	2	0.5976	0	0	NA	1	1	0.6472	1	1	0.59189	1	1	0.94007	0	0	NA	0	0	NA	0	0	NA	0	0	NA	18.549
sp|Q10570|CPSF1_HUMAN	0	0	NA	0	0	NA	0	0	NA	0	0	NA	0	0	NA	0	0	NA	0	0	NA	0	0	NA	0	0	NA	0	0	NA	1	1	0.29157	1	1	NA	0	0	NA	1	1	2.3285	25.291
sp|Q12769|NU160_HUMAN	0	0	NA	0	0	NA	0	0	NA	1	1	1.0149	7	7	0.63137	3	3	0.74804	3	3	0.92359	4	4	0.58876	5	5	0.76635	5	5	0.73301	0	0	NA	0	0	NA	0	0	NA	0	0	NA	27.839
sp|Q12788|TBL3_HUMAN	0	0	NA	0	0	NA	1	1	0.81851	0	0	NA	8	8	1.5734	3	3	3.1014	11	11	1.1949	5	5	0.87905	5	5	1.9638	6	6	0.92922	3	3	0.79181	2	2	24.531	2	2	2.2204	0	0	NA	323.31
sp|Q12789|TF3C1_HUMAN	0	0	NA	0	0	NA	0	0	NA	0	0	NA	2	2	0.8008	1	1	NA	0	0	NA	0	0	NA	0	0	NA	0	0	NA	0	0	NA	0	0	NA	0	0	NA	0	0	NA	6.0313
sp|Q12792|TWF1_HUMAN	0	0	NA	0	0	NA	0	0	NA	0	0	NA	0	0	NA	0	0	NA	0	0	NA	0	0	NA	0	0	NA	0	0	NA	0	0	NA	0	0	NA	0	0	NA	0	0	NA	104.51
sp|Q12846|STX4_HUMAN	0	0	NA	0	0	NA	0	0	NA	0	0	NA	0	0	NA	0	0	NA	0	0	NA	0	0	NA	0	0	NA	0	0	NA	0	0	NA	0	0	NA	0	0	NA	0	0	NA	2.8733
sp|Q12872|SFSWA_HUMAN	0	0	NA	0	0	NA	0	0	NA	0	0	NA	0	0	NA	0	0	NA	1	1	0.13895	0	0	NA	0	0	NA	0	0	NA	0	0	NA	0	0	NA	0	0	NA	0	0	NA	4.3497
sp|Q12874|SF3A3_HUMAN	0	0	NA	0	0	NA	0	0	NA	0	0	NA	0	0	NA	0	0	NA	1	1	0.64306	0	0	NA	0	0	NA	0	0	NA	5	5	1.0446	4	4	7.2896	5	5	3.9712	5	5	6.7453	212.03
sp|Q12904|AIMP1_HUMAN	0	0	NA	0	0	NA	0	0	NA	0	0	NA	0	0	NA	0	0	NA	0	0	NA	0	0	NA	0	0	NA	0	0	NA	0	0	NA	0	0	NA	0	0	NA	0	0	NA	9.8464
sp|Q12905|ILF2_HUMAN	0	0	NA	0	0	NA	1	1	0.3961	3	3	0.67135	3	3	0.9172	2	2	0.92747	1	1	1.0812	1	1	1.6288	0	0	NA	1	1	1.5519	1	1	0.43344	3	3	NA	2	2	2.957	2	2	4.5434	41.426
sp|Q12906|ILF3_HUMAN	0	0	NA	0	0	NA	0	0	NA	1	1	0.69384	5	5	1.7522	3	3	1.0853	4	4	0.96952	1	1	0.80557	1	1	0.73216	1	1	0.93277	2	2	0.45733	2	2	1.2803	3	3	1.0473	2	2	3.0753	298.59
sp|Q12907|LMAN2_HUMAN	0	0	NA	0	0	NA	0	0	NA	0	0	NA	0	0	NA	0	0	NA	0	0	NA	0	0	NA	0	0	NA	0	0	NA	0	0	NA	0	0	NA	0	0	NA	0	0	NA	24.584
sp|Q12926|ELAV2_HUMAN;sp|P26378|ELAV4_HUMAN	0	0	NA	0	0	NA	0	0	NA	0	0	NA	0	0	NA	0	0	NA	0	0	NA	0	0	NA	0	0	NA	0	0	NA	5	4	0.6533	5	4	2.7442	5	4	3.1555	4	3	3.8432	26.468
sp|Q12931|TRAP1_HUMAN	0	0	NA	0	0	NA	0	0	NA	0	0	NA	10	10	0.44578	7	7	0.34358	5	5	0.92176	5	5	0.52857	6	6	0.34247	1	1	0.65377	0	0	NA	0	0	NA	0	0	NA	0	0	NA	108.95
sp|Q12996|CSTF3_HUMAN	0	0	NA	0	0	NA	0	0	NA	0	0	NA	0	0	NA	0	0	NA	0	0	NA	0	0	NA	0	0	NA	0	0	NA	0	0	NA	0	0	NA	0	0	NA	0	0	NA	41.519
sp|Q13011|ECH1_HUMAN	0	0	NA	0	0	NA	0	0	NA	0	0	NA	0	0	NA	0	0	NA	0	0	NA	0	0	NA	0	0	NA	0	0	NA	0	0	NA	0	0	NA	0	0	NA	0	0	NA	12.61
sp|Q13015|AF1Q_HUMAN	0	0	NA	0	0	NA	0	0	NA	0	0	NA	0	0	NA	0	0	NA	0	0	NA	0	0	NA	0	0	NA	0	0	NA	0	0	NA	0	0	NA	0	0	NA	0	0	NA	3.2768
sp|Q13045|FLII_HUMAN	0	0	NA	0	0	NA	0	0	NA	0	0	NA	2	2	0.55791	2	2	0.55943	0	0	NA	1	1	NA	4	4	0.84427	1	1	NA	0	0	NA	0	0	NA	0	0	NA	0	0	NA	15.628
sp|Q13084|RM28_HUMAN	0	0	NA	0	0	NA	0	0	NA	0	0	NA	0	0	NA	0	0	NA	0	0	NA	0	0	NA	0	0	NA	0	0	NA	0	0	NA	0	0	NA	0	0	NA	0	0	NA	5.4359
sp|Q13099|IFT88_HUMAN	0	0	NA	0	0	NA	0	0	NA	0	0	NA	1	1	0.50622	1	1	0.44173	1	1	0.87714	1	1	0.57274	0	0	NA	0	0	NA	0	0	NA	0	0	NA	0	0	NA	0	0	NA	2.058
sp|Q13123|RED_HUMAN	0	0	NA	0	0	NA	0	0	NA	0	0	NA	0	0	NA	0	0	NA	0	0	NA	0	0	NA	0	0	NA	0	0	NA	6	6	0.86605	5	5	11.374	5	5	3.3229	5	5	4.7101	57.913
sp|Q13126|MTAP_HUMAN;tr|F2Z2F3|F2Z2F3_HUMAN	0	0	NA	0	0	NA	0	0	NA	0	0	NA	0	0	NA	0	0	NA	0	0	NA	0	0	NA	0	0	NA	0	0	NA	0	0	NA	0	0	NA	0	0	NA	0	0	NA	56.255
sp|Q13148|TADBP_HUMAN	0	0	NA	1	1	1.9706	0	0	NA	2	2	1.4189	2	2	1.9276	3	3	2.6259	3	3	1.6387	3	3	2.1166	3	3	2.1928	3	3	2.1088	2	2	0.804	3	3	9.3867	1	1	2.836	1	1	6.1596	108.75
sp|Q13151|ROA0_HUMAN	0	0	NA	0	0	NA	0	0	NA	3	3	0.88752	1	1	1.6045	1	1	1.7568	1	1	2.0605	0	0	NA	1	1	NA	1	1	1.0526	0	0	NA	0	0	NA	0	0	NA	0	0	NA	104.4
sp|Q13155|AIMP2_HUMAN	0	0	NA	0	0	NA	0	0	NA	0	0	NA	2	2	0.71741	2	2	0.8609	0	0	NA	0	0	NA	0	0	NA	0	0	NA	0	0	NA	0	0	NA	0	0	NA	0	0	NA	46.3
sp|Q13162|PRDX4_HUMAN	0	0	NA	0	0	NA	2	1	0.67332	2	0	NA	1	0	NA	1	0	NA	1	0	NA	1	0	NA	1	0	NA	1	0	NA	1	0	NA	2	0	NA	1	0	NA	1	0	NA	4.1174
sp|Q13185|CBX3_HUMAN	0	0	NA	0	0	NA	0	0	NA	0	0	NA	0	0	NA	0	0	NA	0	0	NA	0	0	NA	0	0	NA	0	0	NA	0	0	NA	0	0	NA	0	0	NA	0	0	NA	12.62
sp|Q13200|PSMD2_HUMAN	0	0	NA	0	0	NA	1	1	0.54879	2	2	0.70278	13	13	0.63662	11	11	0.61072	5	5	1.1046	9	9	1.171	5	5	0.61387	4	4	1.3369	0	0	NA	0	0	NA	0	0	NA	0	0	NA	81.87
sp|Q13206|DDX10_HUMAN	0	0	NA	0	0	NA	0	0	NA	0	0	NA	1	1	4.0909	0	0	NA	2	2	0.92986	1	1	NA	0	0	NA	2	2	0.74611	1	1	0.87563	1	1	NA	0	0	NA	0	0	NA	67.974
sp|Q13214|SEM3B_HUMAN	0	0	NA	0	0	NA	0	0	NA	0	0	NA	0	0	NA	0	0	NA	0	0	NA	1	1	0.15415	0	0	NA	0	0	NA	1	1	0.39671	0	0	NA	2	2	2.5263	1	1	10.687	2.588
sp|Q13242|SRSF9_HUMAN	0	0	NA	0	0	NA	7	7	0.63249	10	10	0.46728	3	3	1.161	0	0	NA	6	6	0.26003	1	1	0.21394	1	1	0.57164	2	2	0.39045	17	17	0.082188	15	15	38.754	16	16	0.42854	15	15	1.987	323.31
sp|Q13243|SRSF5_HUMAN	1	0	NA	0	0	NA	1	0	NA	0	0	NA	0	0	NA	0	0	NA	1	0	NA	1	0	NA	0	0	NA	1	0	NA	3	3	0.74144	3	2	4.4525	4	3	1.5496	3	2	2.3112	52.814
sp|Q13247|SRSF6_HUMAN	1	1	1.7723	0	0	NA	1	1	0.93009	0	0	NA	0	0	NA	1	1	1.1404	2	2	0.39655	1	1	NA	0	0	NA	2	2	0.5102	12	12	0.14053	12	12	10.211	15	15	0.63564	12	12	2.4886	323.31
sp|Q13263|TIF1B_HUMAN	0	0	NA	0	0	NA	0	0	NA	0	0	NA	3	3	1.2334	1	1	NA	4	4	1.3828	1	1	1.277	0	0	NA	1	1	1.1798	0	0	NA	1	1	NA	0	0	NA	0	0	NA	140.81
sp|Q13283|G3BP1_HUMAN	0	0	NA	0	0	NA	1	1	0.79918	0	0	NA	3	3	1.4896	2	2	1.2038	4	3	1.6391	1	1	1.2469	2	2	1.2701	2	2	1.624	0	0	NA	0	0	NA	0	0	NA	0	0	NA	55.527
sp|Q13310|PABP4_HUMAN	24	14	2.0558	32	21	0.27706	33	22	0.58096	33	21	0.71629	35	23	1.5667	36	24	1.5234	37	25	0.6363	37	25	0.53276	32	21	1.4478	33	22	0.62572	27	17	2.6389	22	14	10.458	23	15	5.2143	24	15	7.8205	323.31
sp|Q13347|EIF3I_HUMAN	0	0	NA	0	0	NA	0	0	NA	0	0	NA	4	4	0.83195	2	2	0.80665	2	2	1.5697	1	1	1.5285	2	2	0.69969	0	0	NA	0	0	NA	0	0	NA	0	0	NA	0	0	NA	33.038
sp|Q13362|2A5G_HUMAN;sp|Q14738|2A5D_HUMAN	0	0	NA	0	0	NA	0	0	NA	0	0	NA	0	0	NA	0	0	NA	0	0	NA	0	0	NA	0	0	NA	0	0	NA	0	0	NA	0	0	NA	0	0	NA	0	0	NA	1.9909
sp|Q13405|RM49_HUMAN	0	0	NA	0	0	NA	0	0	NA	0	0	NA	0	0	NA	0	0	NA	0	0	NA	0	0	NA	0	0	NA	0	0	NA	0	0	NA	0	0	NA	0	0	NA	0	0	NA	171.45
sp|Q13409|DC1I2_HUMAN	0	0	NA	0	0	NA	0	0	NA	0	0	NA	3	3	0.75607	4	4	0.47918	4	4	0.70907	4	4	0.33625	3	3	0.58873	1	1	0.50759	0	0	NA	0	0	NA	0	0	NA	0	0	NA	61.93
sp|Q13427|PPIG_HUMAN	0	0	NA	0	0	NA	0	0	NA	0	0	NA	1	1	NA	0	0	NA	2	2	0.59186	1	1	0.61373	0	0	NA	1	1	1.3585	10	10	0.16387	10	10	9.3882	9	9	0.62161	8	8	2.1134	253.28
sp|Q13428|TCOF_HUMAN	0	0	NA	0	0	NA	0	0	NA	0	0	NA	0	0	NA	0	0	NA	0	0	NA	0	0	NA	0	0	NA	0	0	NA	0	0	NA	0	0	NA	0	0	NA	0	0	NA	3.3986
sp|Q13435|SF3B2_HUMAN	0	0	NA	0	0	NA	0	0	NA	0	0	NA	1	1	0.29042	0	0	NA	5	5	0.45814	1	1	0.44233	0	0	NA	1	1	0.42191	15	15	1.2246	14	14	8.0161	10	10	3.4554	11	11	7.8218	323.31
sp|Q13451|FKBP5_HUMAN	0	0	NA	0	0	NA	0	0	NA	0	0	NA	0	0	NA	0	0	NA	0	0	NA	0	0	NA	0	0	NA	0	0	NA	0	0	NA	0	0	NA	0	0	NA	0	0	NA	10.399
sp|Q13505|MTX1_HUMAN	0	0	NA	0	0	NA	0	0	NA	0	0	NA	0	0	NA	0	0	NA	0	0	NA	0	0	NA	0	0	NA	0	0	NA	0	0	NA	0	0	NA	0	0	NA	0	0	NA	8.2355
sp|Q13509|TBB3_HUMAN;tr|A0A0B4J269|A0A0B4J269_HUMAN	11	1	0.36204	12	1	2.9773	11	1	0.67649	12	1	0.87335	16	1	0.60415	16	1	0.5239	14	1	1.2308	14	1	0.90071	15	1	0.4862	12	1	1.2235	6	0	NA	7	0	NA	5	0	NA	6	0	NA	221.59
sp|Q13523|PRP4B_HUMAN	0	0	NA	0	0	NA	0	0	NA	0	0	NA	0	0	NA	0	0	NA	1	1	0.38047	0	0	NA	0	0	NA	0	0	NA	5	5	0.37749	3	3	NA	5	5	0.45952	4	4	0.92212	62.303
sp|Q13547|HDAC1_HUMAN	0	0	NA	0	0	NA	1	1	0.62545	0	0	NA	2	2	1.045	2	2	0.56865	1	1	1.341	1	1	0.74919	0	0	NA	0	0	NA	0	0	NA	0	0	NA	0	0	NA	0	0	NA	10.692
sp|Q13557|KCC2D_HUMAN;sp|Q13554|KCC2B_HUMAN;sp|Q13555|KCC2G_HUMAN	0	0	NA	0	0	NA	0	0	NA	0	0	NA	2	2	0.47176	1	1	NA	1	1	0.72762	1	1	1.0254	1	1	0.41694	0	0	NA	0	0	NA	0	0	NA	0	0	NA	0	0	NA	40.998
sp|Q13573|SNW1_HUMAN	0	0	NA	0	0	NA	0	0	NA	0	0	NA	1	1	1.9976	2	2	1.8394	2	2	0.62399	1	1	NA	0	0	NA	0	0	NA	16	16	1.0182	12	12	5.8821	12	12	2.8554	14	14	5.4912	280.33
sp|Q13595|TRA2A_HUMAN	3	3	0.82831	4	4	0.9223	7	6	1.2002	9	6	0.34754	8	7	1.5857	6	5	1.2437	12	10	0.37239	6	5	0.25971	4	4	1.2795	7	6	0.4027	16	12	0.47081	11	7	41.821	16	12	1.7497	13	9	6.5018	323.31
sp|Q13601|KRR1_HUMAN	0	0	NA	0	0	NA	0	0	NA	0	0	NA	3	3	2.2875	2	2	2.2671	7	7	0.60187	5	5	0.54131	3	3	1.7904	6	6	0.61883	4	4	0.67131	4	4	2.4579	3	3	2.3615	1	1	1.3124	109.28
sp|Q13610|PWP1_HUMAN	0	0	NA	0	0	NA	0	0	NA	0	0	NA	2	2	2.224	1	1	2.0558	3	3	0.53363	2	2	1.1188	1	1	3.4426	1	1	0.51925	1	1	0.2091	0	0	NA	1	1	NA	0	0	NA	33.953
sp|Q13630|FCL_HUMAN	0	0	NA	0	0	NA	0	0	NA	0	0	NA	0	0	NA	0	0	NA	0	0	NA	0	0	NA	0	0	NA	0	0	NA	0	0	NA	0	0	NA	0	0	NA	0	0	NA	6.3938
sp|Q13642|FHL1_HUMAN	0	0	NA	0	0	NA	0	0	NA	0	0	NA	1	1	0.61587	0	0	NA	1	1	2.338	1	1	2.0124	0	0	NA	0	0	NA	0	0	NA	0	0	NA	0	0	NA	0	0	NA	170.15
sp|Q13685|AAMP_HUMAN	0	0	NA	0	0	NA	0	0	NA	0	0	NA	0	0	NA	0	0	NA	0	0	NA	0	0	NA	0	0	NA	0	0	NA	0	0	NA	0	0	NA	0	0	NA	0	0	NA	1.9931
sp|Q13769|THOC5_HUMAN	0	0	NA	0	0	NA	0	0	NA	0	0	NA	0	0	NA	0	0	NA	0	0	NA	0	0	NA	0	0	NA	0	0	NA	0	0	NA	0	0	NA	0	0	NA	0	0	NA	5.6164
sp|Q13813|SPTN1_HUMAN	0	0	NA	0	0	NA	0	0	NA	0	0	NA	1	1	0.43614	0	0	NA	1	1	0.66579	0	0	NA	2	2	0.52829	0	0	NA	0	0	NA	0	0	NA	0	0	NA	0	0	NA	323.31
sp|Q13823|NOG2_HUMAN	0	0	NA	0	0	NA	0	0	NA	0	0	NA	0	0	NA	0	0	NA	0	0	NA	0	0	NA	0	0	NA	2	2	0.88819	0	0	NA	0	0	NA	0	0	NA	0	0	NA	85.964
sp|Q13835|PKP1_HUMAN	0	0	NA	0	0	NA	0	0	NA	0	0	NA	0	0	NA	0	0	NA	0	0	NA	0	0	NA	3	3	0.020566	1	1	NA	0	0	NA	1	1	NA	0	0	NA	0	0	NA	26.474
sp|Q13838|DX39B_HUMAN	10	10	0.19034	9	9	8.8018	1	1	0.8469	3	3	0.79671	14	14	2.023	11	11	1.8479	14	14	0.67504	10	10	0.64935	13	13	1.793	11	11	0.75717	22	22	0.83023	21	21	10.346	22	22	2.7222	21	21	6.1859	323.31
sp|Q13867|BLMH_HUMAN	0	0	NA	0	0	NA	0	0	NA	0	0	NA	0	0	NA	0	0	NA	0	0	NA	0	0	NA	0	0	NA	0	0	NA	0	0	NA	1	1	0.19439	0	0	NA	0	0	NA	4.1141
sp|Q13868|EXOS2_HUMAN	0	0	NA	0	0	NA	0	0	NA	0	0	NA	0	0	NA	0	0	NA	0	0	NA	0	0	NA	0	0	NA	0	0	NA	0	0	NA	0	0	NA	0	0	NA	0	0	NA	25.345
sp|Q13885|TBB2A_HUMAN	13	0	NA	17	0	NA	15	0	NA	18	0	NA	24	1	0.66255	25	1	0.60399	24	1	1.2752	23	1	1.0611	23	1	0.60667	18	1	1.1293	8	0	NA	9	0	NA	7	0	NA	7	0	NA	11.792
sp|Q13895|BYST_HUMAN	0	0	NA	0	0	NA	0	0	NA	0	0	NA	0	0	NA	0	0	NA	2	2	0.81548	0	0	NA	2	2	1.5617	3	3	0.568	1	1	0.79668	0	0	NA	0	0	NA	0	0	NA	15.11
sp|Q14008|CKAP5_HUMAN	0	0	NA	0	0	NA	0	0	NA	0	0	NA	2	2	NA	0	0	NA	0	0	NA	0	0	NA	1	1	0.40666	1	1	1.0679	0	0	NA	0	0	NA	0	0	NA	0	0	NA	2.0537
sp|Q14103|HNRPD_HUMAN	3	3	2.1865	1	1	2.3448	1	1	0.77857	1	1	0.44213	2	2	1.7317	4	4	1.2624	2	2	1.1597	3	3	0.93945	4	4	1.6857	3	3	1.078	5	5	0.17639	3	3	8.1442	4	4	0.60722	3	3	2.072	95.497
sp|Q14137|BOP1_HUMAN	0	0	NA	0	0	NA	0	0	NA	0	0	NA	8	8	2.4819	6	6	2.2309	11	11	0.63894	7	7	0.77474	7	7	1.6071	10	10	0.6368	4	4	0.50913	2	2	NA	2	2	3.7709	3	3	5.4054	323.31
sp|Q14151|SAFB2_HUMAN	0	0	NA	0	0	NA	2	2	0.62892	3	3	0.43771	1	1	1.5013	0	0	NA	0	0	NA	0	0	NA	0	0	NA	0	0	NA	26	26	0.26128	12	12	9.629	24	24	0.67169	20	20	1.871	323.31
sp|Q14152|EIF3A_HUMAN	0	0	NA	0	0	NA	0	0	NA	0	0	NA	6	6	0.76118	6	6	0.75958	4	4	1.1674	3	3	0.72199	5	5	0.6798	4	4	1.2499	0	0	NA	0	0	NA	0	0	NA	0	0	NA	157.43
sp|Q14157|UBP2L_HUMAN	0	0	NA	0	0	NA	1	1	0.53319	1	1	0.54186	5	5	1.0753	5	5	0.8132	5	5	0.77104	4	4	0.79133	3	3	1.1825	2	2	1.3911	1	1	0.35619	0	0	NA	0	0	NA	1	1	NA	318.5
sp|Q14160|SCRIB_HUMAN;sp|Q9BTT6|LRRC1_HUMAN	0	0	NA	0	0	NA	0	0	NA	0	0	NA	1	1	0.5387	1	1	0.4391	2	2	0.65992	0	0	NA	2	2	0.44723	2	2	0.75039	0	0	NA	0	0	NA	0	0	NA	0	0	NA	12.463
sp|Q14165|MLEC_HUMAN	0	0	NA	0	0	NA	0	0	NA	0	0	NA	0	0	NA	0	0	NA	0	0	NA	0	0	NA	0	0	NA	0	0	NA	0	0	NA	0	0	NA	0	0	NA	0	0	NA	14.731
sp|Q14166|TTL12_HUMAN	0	0	NA	0	0	NA	0	0	NA	0	0	NA	1	1	0.84176	2	2	0.83667	1	1	0.48186	0	0	NA	1	1	0.98436	0	0	NA	0	0	NA	0	0	NA	0	0	NA	0	0	NA	6.1142
sp|Q14197|ICT1_HUMAN	0	0	NA	0	0	NA	0	0	NA	0	0	NA	0	0	NA	0	0	NA	0	0	NA	0	0	NA	0	0	NA	0	0	NA	0	0	NA	0	0	NA	0	0	NA	0	0	NA	7.9109
sp|Q14203|DCTN1_HUMAN;tr|E7EWF7|E7EWF7_HUMAN	0	0	NA	0	0	NA	0	0	NA	0	0	NA	4	4	0.38048	3	3	0.37118	1	1	0.7297	2	2	0.67037	3	3	0.37126	1	1	0.5736	0	0	NA	0	0	NA	0	0	NA	0	0	NA	30.012
sp|Q14204|DYHC1_HUMAN	0	0	NA	1	1	1.8558	1	1	0.58991	1	1	0.67699	74	74	0.55525	65	65	0.46536	58	58	0.62442	62	62	0.53195	52	52	0.44978	51	51	0.58584	0	0	NA	0	0	NA	0	0	NA	0	0	NA	323.31
sp|Q14232|EI2BA_HUMAN	0	0	NA	0	0	NA	0	0	NA	0	0	NA	0	0	NA	0	0	NA	0	0	NA	0	0	NA	0	0	NA	0	0	NA	0	0	NA	0	0	NA	0	0	NA	0	0	NA	14.701
sp|Q14240|IF4A2_HUMAN	3	0	NA	2	0	NA	2	0	NA	4	0	NA	9	0	NA	8	0	NA	6	0	NA	6	0	NA	7	0	NA	6	0	NA	7	1	1.181	4	0	NA	4	0	NA	5	0	NA	-2
sp|Q14247|SRC8_HUMAN	0	0	NA	0	0	NA	0	0	NA	0	0	NA	0	0	NA	0	0	NA	0	0	NA	0	0	NA	0	0	NA	0	0	NA	0	0	NA	0	0	NA	0	0	NA	0	0	NA	21.916
sp|Q14257|RCN2_HUMAN	12	12	0.22375	11	11	1.8369	13	13	0.46106	16	16	0.61484	16	16	0.3076	15	15	0.2692	15	15	0.26636	13	13	0.22744	13	13	0.26708	14	14	0.24927	0	0	NA	0	0	NA	0	0	NA	0	0	NA	323.31
sp|Q14258|TRI25_HUMAN	0	0	NA	0	0	NA	0	0	NA	0	0	NA	0	0	NA	0	0	NA	0	0	NA	0	0	NA	0	0	NA	0	0	NA	0	0	NA	0	0	NA	0	0	NA	0	0	NA	2.8262
sp|Q14315|FLNC_HUMAN	0	0	NA	0	0	NA	0	0	NA	0	0	NA	2	0	NA	2	0	NA	1	0	NA	3	1	6.763	3	0	NA	1	0	NA	0	0	NA	0	0	NA	0	0	NA	0	0	NA	2.1025
sp|Q14318|FKBP8_HUMAN	0	0	NA	0	0	NA	0	0	NA	0	0	NA	1	1	1.2006	1	1	NA	1	1	NA	0	0	NA	1	1	NA	0	0	NA	0	0	NA	0	0	NA	0	0	NA	0	0	NA	27.037
sp|Q14444|CAPR1_HUMAN	0	0	NA	0	0	NA	0	0	NA	0	0	NA	0	0	NA	0	0	NA	0	0	NA	0	0	NA	0	0	NA	0	0	NA	0	0	NA	0	0	NA	0	0	NA	0	0	NA	59.904
sp|Q14498|RBM39_HUMAN;sp|Q86U06|RBM23_HUMAN	4	4	0.36898	5	5	3.8252	3	3	0.52385	5	5	0.7233	6	6	0.70496	7	7	0.63759	8	8	0.69586	9	9	0.57455	7	7	0.5933	7	7	0.67633	5	5	0.56571	7	7	10.247	5	5	1.6118	7	7	4.2602	323.31
sp|Q14527|HLTF_HUMAN	1	1	0.23495	0	0	NA	0	0	NA	1	1	0.5473	1	1	1.9256	0	0	NA	1	1	1.7163	0	0	NA	1	1	1.938	0	0	NA	0	0	NA	0	0	NA	0	0	NA	0	0	NA	6.0659
sp|Q14562|DHX8_HUMAN	0	0	NA	0	0	NA	0	0	NA	0	0	NA	0	0	NA	0	0	NA	0	0	NA	0	0	NA	0	0	NA	0	0	NA	5	5	0.21583	3	3	NA	5	5	0.77098	2	2	2.6073	24.375
sp|Q14566|MCM6_HUMAN	0	0	NA	0	0	NA	0	0	NA	0	0	NA	3	3	1.0262	2	2	0.70214	2	2	1.6403	1	1	NA	0	0	NA	0	0	NA	0	0	NA	0	0	NA	0	0	NA	0	0	NA	9.8442
sp|Q14671|PUM1_HUMAN;sp|Q8TB72|PUM2_HUMAN	0	0	NA	0	0	NA	0	0	NA	0	0	NA	3	3	0.97243	3	3	0.9615	3	3	1.1975	2	2	0.67231	0	0	NA	1	1	0.94829	0	0	NA	1	1	NA	0	0	NA	1	1	NA	10.758
sp|Q14676|MDC1_HUMAN	0	0	NA	0	0	NA	0	0	NA	0	0	NA	3	3	0.52458	2	2	NA	2	2	0.89736	0	0	NA	0	0	NA	0	0	NA	0	0	NA	0	0	NA	0	0	NA	0	0	NA	7.3799
sp|Q14677|EPN4_HUMAN	0	0	NA	0	0	NA	0	0	NA	0	0	NA	0	0	NA	0	0	NA	1	1	0.5781	1	1	0.53261	1	1	0.18627	1	1	0.36184	0	0	NA	0	0	NA	0	0	NA	0	0	NA	4.5497
sp|Q14683|SMC1A_HUMAN	0	0	NA	0	0	NA	1	1	0.3981	1	1	0.63713	9	9	0.80428	10	10	0.71329	13	13	0.81521	11	11	0.6758	6	6	0.71837	4	4	1.7176	0	0	NA	0	0	NA	0	0	NA	0	0	NA	65.541
sp|Q14684|RRP1B_HUMAN	0	0	NA	0	0	NA	0	0	NA	1	1	NA	1	1	1.2541	0	0	NA	0	0	NA	0	0	NA	0	0	NA	0	0	NA	0	0	NA	0	0	NA	0	0	NA	0	0	NA	25.857
sp|Q14690|RRP5_HUMAN	0	0	NA	0	0	NA	0	0	NA	0	0	NA	1	1	0.92054	0	0	NA	3	3	0.90001	2	2	0.92736	1	1	0.89671	2	2	1.0226	0	0	NA	0	0	NA	0	0	NA	0	0	NA	92.595
[truncated: 860 more rows]
