# Supplementary material for: Dissection of affinity captured LINE-1 macromolecular complexes
Source: eLife. 2018 Jan 8;7:e30094. doi: 10.7554/eLife.30094 (PMC5821459; doi:10.7554/eLife.30094)
Supplement: Supplementary file 2. [file elife-30094-supp2.xlsx]

## Sheet: Overexpression
		Average	SD
	MOV10	0.01	0.00372095
	ZCCHC3	0.08	0.00987898
	PURA	0.18	0.0131869
	STOML2	0.37	0.0707107
	TOMM40	0.41	0.106066
	UPF1	0.44	0.0160586										2015-12-04
	YARS2	0.46	0.0989949
	NAP1L1	0.5	0.155563
	HSPA8	0.51	0.205061
	TIMM13	0.53	0.0636396
	RUVBL2	0.59	0.0485785
	HIST1H2BO	0.59	0.0494975
	FKBP4	0.6	0.183848
	DDX6	0.61	0.141421
	HMCES	0.61	0.141421
	NAP1L4	0.62	0.0812232
	CORO1B	0.63	0.183848
	PARP1	0.64	0.0128319
	DDX28	0.65	0.141421
	TUBB2C	0.66	0.0649185
	ERAL1	0.68	0.146253
	LARP7	0.71	0.0464948
	TUBA1B	0.72	0.0444668
	HSP90AB1	0.74	0.0377934
	PCNA	0.78	0.110025
	HAX1	0.78	0.0849848
	BAG2	0.8	0.114355
	YME1L1	0.8	0.0667389
	MEPCE	0.82	0.00766799
	TROVE2	0.84	0.182706
	FASTKD2	0.92	0.132588

## Sheet: siRNA
		gene	Avg RT over Ctrl			% Dead Cells	SD_RT	SD_cells
		MOV10	2.90841			18.5155	0.0485473	2.09291
		TOP1	2.36367			5.28596	0.37522	1.38808
		ZCCHC3	1.87458			2.5513	0.0819667	1.82595
		UPF1	1.8316			51.8583	0.491207	2.5275
		PARP1	1.49263			28.6581	0.882844	3.32157
		PURA	1.4018			7.65034	0.306275	2.21823
		Control	1.01988			7.92538	0.0206339	1.17971
		PURB	0.915305			7.75569	0.172966	0.621447
		MAGOH	0.548989			56.1158	0.0788235	5.89111
		IGF2BP1	0.486057			45.6525	0.0222889	1.50196
		RBM8A	0.0938948			64.0237	0.0930053	46.2635
		EIF4A3	0.04342			92.4616	0.0430087	0.186048
