# Supplementary material for: Dissection of affinity captured LINE-1 macromolecular complexes
Source: eLife. 2018 Jan 8;7:e30094. doi: 10.7554/eLife.30094 (PMC5821459; doi:10.7554/eLife.30094)
Supplement: Supplementary file 3. [file elife-30094-supp3.xlsx]

## Sheet: Proteins
Uniprot	Gene	Description	Exp#	WCE
Q04837	SSBP1	Single-stranded DNA-binding protein, mitochondrial OS=Homo sapiens GN=SSBP1 PE=1 SV=1 - [SSBP_HUMAN]	1-2-3
E5RIU6	CDK1	Cyclin-dependent kinase 1 (Fragment) OS=Homo sapiens GN=CDK1 PE=1 SV=2 - [E5RIU6_HUMAN]	1-3
E7EWK3	DHX36	ATP-dependent RNA helicase DHX36 (Fragment) OS=Homo sapiens GN=DHX36 PE=1 SV=1 - [E7EWK3_HUMAN]	1-3
O94906-2	PRPF6	Isoform 2 of Pre-mRNA-processing factor 6 OS=Homo sapiens GN=PRPF6 - [PRP6_HUMAN]	1-3
Q96PK6	RBM14	RNA-binding protein 14 OS=Homo sapiens GN=RBM14 PE=1 SV=2 - [RBM14_HUMAN]	1-3
C9JB80	U2SURP	U2 snRNP-associated SURP motif-containing protein (Fragment) OS=Homo sapiens GN=U2SURP PE=1 SV=4 - [C9JB80_HUMAN]	1-3
Q13243-3	SRSF5	Isoform SRP40-4 of Serine/arginine-rich splicing factor 5 OS=Homo sapiens GN=SRSF5 - [SRSF5_HUMAN]	1-2
Q14222	EEF1A	EEF1A protein (Fragment) OS=Homo sapiens GN=EEF1A PE=1 SV=1 - [Q14222_HUMAN]	1-2
Q14966-2	ZNF638	Isoform 2 of Zinc finger protein 638 OS=Homo sapiens GN=ZNF638 - [ZN638_HUMAN]	1-3
B4E0E1	PARP1	cDNA FLJ53442, highly similar to Poly (ADP-ribose) polymerase 1 (EC 2.4.2.30) OS=Homo sapiens PE=2 SV=1 - [B4E0E1_HUMAN]	1-3
O95373	IPO7	Importin-7 OS=Homo sapiens GN=IPO7 PE=1 SV=1 - [IPO7_HUMAN]	1-2-3
P12004	PCNA	Proliferating cell nuclear antigen OS=Homo sapiens GN=PCNA PE=1 SV=1 - [PCNA_HUMAN]	1-2-3	+
Q92900-2	UPF1	Isoform 2 of Regulator of nonsense transcripts 1 OS=Homo sapiens GN=UPF1 - [RENT1_HUMAN]	1-2-3
Q2NLD4	PURA	PURA protein (Fragment) OS=Homo sapiens GN=PURA PE=2 SV=1 - [Q2NLD4_HUMAN]	1-3
B9EG90	TOP1	Topoisomerase (DNA) I OS=Homo sapiens GN=TOP1 PE=2 SV=1 - [B9EG90_HUMAN]	1-3
