# Supplementary material for: Dissection of affinity captured LINE-1 macromolecular complexes
Source: eLife. 2018 Jan 8;7:e30094. doi: 10.7554/eLife.30094 (PMC5821459; doi:10.7554/eLife.30094)
Supplement: Supplementary file 5. [file elife-30094-supp5.xlsx]

## Sheet: Normalized data
Supplementary File 5: Nuclear Location and ORF2p status
Global Cell #	ORF2p+	X (microns from left)	Y (microns from top)	Index of Paired ORF2p+ Nucleus	Distance to paired ORF2p+ Nucleus	P-value	FDR		Note: data to the right are provided for illustrative purposes only and show one random pairing out of 1,000 permutations incorporated.	Index of Randomly Selected Nucleus	Distance to Randomly Selected Nucleus
A 20130402 LD401 Fibro 001 x600			Original Mag: x600
A-1	0	50.6542	7.32799							A-4	72.3681
A-2	0	93.4486	4.2173							A-5	71.5301
A-3	0	171.451	11.2203							A-6	81.5388
A-4	1	122.467	16.2198	A-2	76.5251	0.7918	0.826991			A-1	72.3681
A-5	0	25.0186	25.0486							A-10	49.4016
A-6	0	95.5437	40.9943							A-9	27.4037
A-7	0	170.3	37.9608							A-4	52.5389
A-8	0	145.58	52.9093							A-11	47.9555
A-9	0	99.2561	68.1442							A-6	27.4037
A-10	0	20.0418	74.1959							A-5	49.4016
A-11	0	177.806	88.4215							A-2	119.19
A-12	1	107.169	91.1954	A-7	35.3223	0.1978	0.371864			A-16	44.44
A-13	1	51.3808	104.613	A-6	24.1636	0.0316	0.135018			A-10	43.6688
A-14	0	159.595	112.778							A-16	88.1354
A-15	0	5.81635	112.592							A-16	65.9892
A-16	1	71.602	117.843	A-7	22.8176	0.0144	0.2256			A-17	22.8176
A-17	1	93.6245	123.823	A-6	22.8176	0.0144	0.1692			A-16	22.8176
A-18	0	63.0704	145.18							A-10	83.0045
A-19	0	149.282	144.079							A-9	90.9334
A-20	0	20.4657	149.816							A-16	60.3075
A-21	0	192.642	150.66							A-22	48.3538
A-22	0	144.804	157.693							A-21	48.3538
B 20130402 LD401 Fibro 002 x600			Original Mag: x600
B-23	0	107.861	5.56965							B-27	108.139
B-24	0	16.8398	17.2423							B-32	187.226
B-25	0	39.5192	36.4365							B-35	96.9626
B-26	0	97.864	50.2329							B-27	105.997
B-27	0	203.723	55.6204							B-33	104.699
B-28	0	70.5833	78.3602							B-34	73.85
B-29	0	4.21981	86.5465							B-35	64.4631
B-30	0	97.0541	87.7604							B-28	28.0895
B-31	1	82.3799	97.894	B-33	34.5034	0.056	0.219333			B-35	48.4155
B-32	0	178.556	111.581							B-24	187.226
B-33	1	114.52	110.442	B-31	34.5034	0.056	0.202462			B-27	104.699
B-34	0	10.392	121.151							B-27	204.134
B-35	0	48.9775	132.938							B-36	35.7717
B-36	0	14.4646	142.321							B-34	21.5577
C 20130501 LD401 Fibro 001 x1000			Original Mag: x1000
C-37	0	25.6029	6.84292							C-48	68.795
C-38	0	100.987	4.9334							C-48	84.0407
C-39	0	122.949	7.08632							C-40	71.3719
C-40	0	53.8789	25.0727							C-46	82.1529
C-41	0	10.8955	34.9658							C-48	53.0421
C-42	0	109.586	40.3072							C-47	91.4983
C-43	1	64.1064	42.7373	C-48	32.1245	0.171	0.365318			C-39	68.7973
C-44	0	54.7083	45.3409							C-43	9.75295
C-45	0	85.8023	50.7466							C-46	41.8273
C-46	0	123.855	68.1157							C-40	82.1529
C-47	0	22.4285	68.1486							C-42	91.4983
C-48	1	49.5023	71.353	C-43	32.1245	0.171	0.349435			C-38	84.0407
C-49	0	102.148	89.5362							C-46	30.4911
C-50	0	35.6661	90.8008							C-48	23.8657
D 20130501 LD401 Fibro 002 x400			Original Mag: x400
D-51	0	81.4292	12.7417							D-54	74.2922
D-52	1	186.362	33.7071	D-53	50.7903	0.285833	0.419818			D-57	55.926
D-53	1	135.906	39.5757	D-52	50.7903	0.285833	0.407096			D-57	82.464
D-54	0	11.4142	37.57							D-51	74.2922
D-55	0	261.783	60.8337							D-57	63.9782
D-56	0	26.4858	84.7127							D-53	118.362
D-57	0	203.388	86.9759							D-61	46.6619
D-58	0	311.363	94.8637							D-61	89.6682
D-59	1	162.389	95.9104	D-60	55.3533	0.320833	0.39682			D-64	51.4307
D-60	1	107.24	100.652	D-59	55.3533	0.320833	0.386645			D-56	82.3082
D-61	0	227.601	126.866							D-57	46.6619
D-62	0	288.608	128.331							D-65	32.6528
D-63	0	20.7764	130.04							D-54	92.9435
D-64	0	194.001	136.483							D-59	51.4307
D-65	0	257.45	138.094							D-62	32.6528
D-66	0	8.43915	149.065							D-56	66.8432
D-67	1	100.203	160.338	D-60	60.1037	0.402167	0.472546			D-53	125.929
D-68	0	152.328	179.737							D-64	60.0651
D-69	0	285.13	176.609							D-61	76.0511
D-70	0	223.094	190.789							D-64	61.6101
D-71	0	263.773	209.413							D-64	100.929
D-72	1	173.81	219.753	D-67	94.5938	0.8345	0.8345			D-70	57.1594
E 20130501 LD401 Fibro 003 x400			Original Mag: x400
E-73	0	88.4844	17.9557							E-74	25.38
E-74	0	63.105	17.9627							E-73	25.38
E-75	0	240.731	30.8142							E-78	59.9382
E-76	0	121.043	38.73							E-73	38.6205
E-77	0	30.0708	49.783							E-83	73.4239
E-78	1	190.902	64.1179	E-80	53.6631	0.19925	0.360183			E-75	59.9382
E-79	0	146.173	76.0526							E-77	119.035
E-80	1	239.936	85.9092	E-78	53.6631	0.19925	0.346843			E-93	124.565
E-81	0	83.1583	95.0358							E-90	87.8278
E-82	0	273.382	114.851							E-87	45.9416
E-83	0	23.8509	122.938							E-77	73.4239
E-84	0	177.367	128.929							E-78	66.2072
E-85	0	116.515	125.367							E-76	86.7583
E-86	0	241.27	155.407							E-93	55.7676
E-87	0	289.998	157.683							E-82	45.9416
E-88	1	141.932	163.696	E-90	60.7031	0.28775	0.397772			E-79	87.7525
E-89	0	203.263	179.08							E-93	41.2309
E-90	1	84.3333	182.86	E-88	60.7031	0.28775	0.386407			E-92	90.3582
E-91	0	60.6531	192.45							E-96	74.5069
E-92	0	171.394	207.046							E-84	78.3485
E-93	0	230.412	210.106							E-86	55.7676
E-94	0	26.0849	220.691							E-83	97.7754
E-95	0	286.238	217.949							E-96	159.881
E-96	0	126.617	227.079							E-92	49.0464
F 20130501 LD401 Fibro 004 x400			Original Mag: x400
F-97	0	75.6684	13.5649							F-102	60.3468
F-98	0	210.977	22.6995							F-112	128.552
F-99	0	258.022	22.5191							F-101	52.2966
F-100	0	105.702	35.5568							F-108	94.2371
F-101	0	308.376	36.6198							F-109	173.87
F-102	0	19.4066	35.3948							F-97	60.3468
F-103	0	51.4427	59.5856							F-102	40.1443
F-104	1	201.352	80.02	F-107	40.0815	0.121167	0.31638			F-111	113.051
F-105	0	110.65	87.5127							F-106	39.1005
F-106	1	149.754	87.3146	F-109	42.5485	0.180667	0.353806			F-105	39.1005
F-107	1	228.434	109.567	F-104	40.0815	0.121167	0.299728			F-117	106.317
F-108	0	49.5229	111.218							F-110	18.3645
F-109	1	160.716	128.417	F-112	33.5396	0.0166667	0.156667			F-118	66.4627
F-110	0	54.729	128.832							F-108	18.3645
F-111	0	100.871	131.832							F-115	38.8234
F-112	1	187.176	149.03	F-109	33.5396	0.0166667	0.130556			F-117	113.326
F-113	0	266.258	153.49							F-99	131.229
F-114	0	29.9467	163.006							F-110	42.2175
F-115	0	83.279	166.441							F-114	53.4402
F-116	0	213.18	175.625							F-104	96.3391
F-117	0	290.304	196.034							F-106	177.692
F-118	0	140.645	191.778							F-120	64.0125
F-119	0	56.4024	194.338							F-115	38.742
F-120	0	81.6165	216.542							F-118	64.0125
F-121	1	190.438	222.352	F-112	73.3924	0.607833	0.696785			F-111	127.345
F-122	0	310.433	235.249							F-117	44.0843
G 20130501 LD401 Fibro 005 x400			Original Mag: x400
G-123	0	24.866	8.33231							G-129	141.686
G-124	0	118.412	5.90094							G-132	104.651
G-125	0	228.534	13.1693							G-129	85.4378
G-126	0	230.069	25.0604							G-128	71.2127
G-127	1	76.0245	45.7108	G-132	52.4031	0.30875	0.40309			G-130	57.1099
G-128	0	295.896	52.2189							G-137	69.0319
G-129	1	156.904	59.7406	G-136	75.2299	0.69875	0.746392			G-125	85.4378
G-130	0	20.884	60.5809							G-132	59.6024
G-131	1	255.55	98.6837	G-136	49.7334	0.261625	0.424013			G-138	95.7382
G-132	1	67.7146	97.4517	G-127	52.4031	0.30875	0.392196			G-134	43.825
G-133	0	314.097	109.499							G-128	60.1019
G-134	0	107.85	115.036							G-132	43.825
G-135	0	38.1724	114.882							G-130	56.9863
G-136	1	208.422	114.562	G-138	46.8757	0.212875	0.357326			G-145	85.1449
G-137	0	280.06	119.412							G-128	69.0319
G-138	1	169.566	140.789	G-140	42.1416	0.143875	0.338106			G-134	66.8762
G-139	0	80.2007	159.043							G-143	33.0888
G-140	1	133.286	162.228	G-138	42.1416	0.143875	0.322006			G-144	30.4535
G-141	0	268.272	167.033							G-147	76.8088
G-142	0	24.9472	177.684							G-134	103.905
G-143	0	78.8191	192.102							G-134	82.3467
G-144	0	143.125	191.051							G-134	83.7986
G-145	1	236.097	195.08	G-136	85.1449	0.794875	0.812155			G-137	87.5125
G-146	0	181.088	220.308							G-145	60.5199
G-147	0	219.983	226.761							G-145	35.5454
G-148	0	288.126	228.187							G-145	61.6717
G-149	0	73.2854	235.036							G-143	43.2946
H 20130405 LD401 Fibro 002 x1000			Original Mag: x1000
H-150	0	31.7095	4.35783							H-152	66.6719
H-151	0	83.6676	2.58528							H-153	7.33843
H-152	0	98.3592	2.65377							H-150	66.6719
H-153	0	78.2817	7.56925							H-151	7.33843
H-154	0	9.09981	20.3707							H-161	82.2132
H-155	0	119.796	21.6327							H-161	58.3632
H-156	0	78.4497	29.2861							H-159	31.2029
H-157	0	120.082	37.7708							H-160	89.6039
H-158	0	7.94396	42.6192							H-153	78.5889
H-159	1	52.3502	46.3898	H-161	31.7462	0.101	0.296687			H-156	31.2029
H-160	0	34.3122	63.7015							H-158	33.7601
H-161	1	79.112	63.4682	H-159	31.7462	0.101	0.279235			H-154	82.2132
H-162	0	105.841	82.3437							H-157	46.7896
H-163	0	114.41	88.4338							H-150	117.928
H-164	0	50.5837	94.2326							H-154	84.7106
I 20130405 LD401 Fibro 003 x1000			Original Mag: x1000
I-165	0	5.47934	1.79651							I-168	45.4465
I-166	0	65.6827	8.30906							I-167	44.4497
I-167	1	109.96	12.1851	I-177	32.6178	0.27775	0.435142			I-166	44.4497
I-168	1	44.8816	24.4522	I-174	47.1168	0.6425	0.718988			I-165	45.4465
I-169	0	91.8925	29.4968							I-167	25.0232
I-170	0	6.67302	26.8686							I-174	42.4525
I-171	0	44.4646	56.8884							I-174	23.4763
I-172	0	6.25472	59.987							I-176	26.4633
I-173	0	109.163	63.4737							I-175	37.4453
I-174	1	22.8723	66.1125	I-168	47.1168	0.6425	0.702267			I-170	42.4525
I-175	0	76.9656	82.6016							I-171	41.4476
I-176	0	1.93623	86.1017							I-172	26.4633
I-177	1	135.678	32.2465	I-167	32.6178	0.27775	0.421105			I-172	132.369
J 20130402 LD401 Fibro 002 x400			Original Mag: x400
J-178	0	254.051	15.2743							J-199	108.832
J-179	0	103.197	16.0936							J-190	115.774
J-180	0	141.855	14.8186							J-199	176.906
J-181	0	216.706	22.0851							J-192	142.058
J-182	0	56.78	29.3939							J-189	82.6126
J-183	0	89.4849	29.0255							J-180	54.2636
J-184	0	20.9561	31.8462							J-203	139.157
J-185	0	179.862	37.1349							J-188	18.3648
J-186	0	285.843	47.8427							J-188	117.594
J-187	0	221.564	48.7314							J-181	27.0779
J-188	0	168.296	51.4047							J-189	35.7287
J-189	0	133.576	59.8333							J-178	128.447
J-190	0	208.501	64.2106							J-179	115.774
J-191	0	283.404	65.2771							J-186	17.6099
J-192	1	83.4682	71.3625	J-193	28.6516	0.02875	0.193036			J-198	37.329
J-193	1	111.404	77.7498	J-192	28.6516	0.02875	0.168906			J-188	62.7051
J-194	0	202.543	84.237							J-181	63.7449
J-195	0	8.63278	95.2528							J-189	129.873
J-196	0	240.667	104.791							J-199	46.0677
J-197	0	160.077	101.123							J-198	84.0811
J-198	0	76.2825	107.988							J-192	37.329
J-199	0	284.211	119.84							J-178	108.832
J-200	1	202.301	117.486	J-204	35.8718	0.068	0.228286			J-189	89.7057
J-201	0	63.8406	129.169							J-211	56.6037
J-202	0	172.417	134.472							J-185	97.6239
J-203	0	97.1283	148.31							J-210	131.847
J-204	1	200.791	153.331	J-200	35.8718	0.068	0.213067			J-196	62.8215
J-205	0	310.079	167.564							J-215	79.963
J-206	0	278.825	165.884							J-191	100.704
J-207	0	145.85	167.115							J-193	95.7706
J-208	0	10.1304	164.502							J-185	212.206
J-209	0	103.897	168.844							J-198	66.825
J-210	0	225.822	176.991							J-188	138.135
J-211	0	71.2988	185.279							J-180	184.483
J-212	0	265.876	193.822							J-199	76.217
J-213	0	30.4597	200.922							J-198	103.612
J-214	0	97.2108	225.637							J-202	118.188
J-215	0	258.523	228.676							J-181	210.778
J-216	0	308.084	225.791							J-211	240.22
J-217	0	210.638	234.689							J-189	191.087
J-218	0	160.189	236.126							J-209	87.7297
J-219	0	6.73538	236.334							J-204	211.055
K 20130402 LD401 Fibro 003 x400			Original Mag: x400
K-220	0	27.2295	3.71203							K-257	203.99
K-221	0	148.866	6.98443							K-246	119.849
K-222	0	233.39	4.25307							K-247	187.288
K-223	0	255.558	9.79222							K-240	112.698
K-224	0	189.656	19.471							K-251	143.665
K-225	0	287.286	39.1741							K-259	178.127
K-226	0	21.9767	51.6979							K-257	159.473
K-227	0	236.004	55.0118							K-246	98.8711
K-228	0	182.513	54.8689							K-239	53.3052
K-229	0	134.395	61.5413							K-225	154.528
K-230	0	86.2024	64.7472							K-260	174.397
K-231	1	169.61	76.3986	K-240	24.6704	0.03075	0.160583			K-246	49.1879
K-232	0	313.615	79.1512							K-227	81.2872
K-233	0	5.93797	80.308							K-252	168.394
K-234	0	53.1057	84.1894							K-240	131.211
K-235	0	246.186	86.0939							K-240	63.3431
K-236	0	304.639	83.0323							K-255	98.3064
K-237	0	111.695	87.3144							K-240	72.6404
K-238	0	27.2517	88.9887							K-240	156.666
K-239	0	223	89.5399							K-228	53.3052
K-240	1	183.732	96.6267	K-231	24.6704	0.03075	0.144525			K-256	104.637
K-241	0	66.5599	114.834							K-228	130.536
K-242	0	278.835	116.75							K-256	95.3302
K-243	0	39.8816	118.978							K-247	76.1349
K-244	0	255.403	117.22							K-259	102.139
K-245	0	189.965	126.828							K-249	59.9687
K-246	0	166.671	125.495							K-250	33.5459
K-247	0	111.036	146.055							K-257	66.0933
K-248	0	312.498	142.305							K-252	159.015
K-249	1	134.549	149.743	K-252	22.2489	0.0075	0.3525			K-245	59.9687
K-250	0	190.231	149.38							K-246	33.5459
K-251	0	252.316	148.75							K-262	90.4522
K-252	1	154.438	159.714	K-249	22.2489	0.0075	0.17625			K-261	75.2434
K-253	0	257.201	162.448							K-228	130.966
K-254	0	30.4948	167.344							K-249	105.538
K-255	0	303.517	181.33							K-256	81.8197
K-256	0	222.645	193.765							K-255	81.8197
K-257	0	75.6483	201.869							K-260	56.9544
K-258	0	155.256	201.37							K-252	41.6681
K-259	0	277.179	217.009							K-225	178.127
K-260	0	25.0861	228.093							K-257	56.9544
K-261	0	119.54	226.374							K-252	75.2434
K-262	0	217.212	232.11							K-250	87.0182

## Sheet: Find Nuclei Script
Script for identification of Nuclei
The following script was run using ImageJ v. 1.51r as an .ijm to identify cellular nuclei.	The same script was used but run with a different color filter to identify the ORF stained nuclei.
run("Gaussian Blur...", "sigma=7");	run("Gaussian Blur...", "sigma=7");
run("Color Threshold...");	run("Color Threshold...");
// Color Thresholder 1.51r	// Color Thresholder 1.51r
// Autogenerated macro, single images only!	// Autogenerated macro, single images only!
min=newArray(3);	min=newArray(3);
max=newArray(3);	max=newArray(3);
filter=newArray(3);	filter=newArray(3);
a=getTitle();	a=getTitle();
run("RGB Stack");	run("RGB Stack");
run("Convert Stack to Images");	run("Convert Stack to Images");
selectWindow("Red");	selectWindow("Red");
rename("0");	rename("0");
selectWindow("Green");	selectWindow("Green");
rename("1");	rename("1");
selectWindow("Blue");	selectWindow("Blue");
rename("2");	rename("2");
min[0]=0;	min[0]=0;
max[0]=255;	max[0]=255;
filter[0]="pass";	filter[0]="pass";
min[1]=0;	min[1]=70;
max[1]=255;	max[1]=255;
filter[1]="pass";	filter[1]="pass";
min[2]=80;	min[2]=0;
max[2]=255;	max[2]=255;
filter[2]="pass";	filter[2]="pass";
for (i=0;i<3;i++){	for (i=0;i<3;i++){
selectWindow(""+i);	selectWindow(""+i);
setThreshold(min[i], max[i]);	setThreshold(min[i], max[i]);
run("Convert to Mask");	run("Convert to Mask");
if (filter[i]=="stop") run("Invert");	if (filter[i]=="stop") run("Invert");
}	}
imageCalculator("AND create", "0","1");	imageCalculator("AND create", "0","1");
imageCalculator("AND create", "Result of 0","2");	imageCalculator("AND create", "Result of 0","2");
for (i=0;i<3;i++){	for (i=0;i<3;i++){
selectWindow(""+i);	selectWindow(""+i);
close();	close();
}	}
selectWindow("Result of 0");	selectWindow("Result of 0");
close();	close();
selectWindow("Result of Result of 0");	selectWindow("Result of Result of 0");
rename(a);	rename(a);
// Colour Thresholding-------------	// Colour Thresholding-------------
//setThreshold(255, 255);	//setThreshold(255, 255);
setOption("BlackBackground", false);	setOption("BlackBackground", false);
run("Make Binary");	run("Make Binary");
run("Median...", "radius=10");	run("Median...", "radius=10");
run("Fill Holes");	run("Fill Holes");
run("Watershed");	run("Watershed");
run("Analyze Particles...", "size=2000-Infinity show=Outlines display clear summarize");	run("Analyze Particles...", "size=2000-Infinity show=Outlines display clear summarize");
