# Supplementary material for: Dissection of affinity captured LINE-1 macromolecular complexes
Source: eLife. 2018 Jan 8;7:e30094. doi: 10.7554/eLife.30094 (PMC5821459; doi:10.7554/eLife.30094)
Supplement: Supplementary file 6. [file elife-30094-supp6.xlsx]

## Sheet: RNase_sensitive_CC
Analysis Type:	PANTHER Overrepresentation Test (release 20170413)
Annotation Version and Release Date:	GO Ontology database Released 2017-05-25
Analyzed List:	Client Text Box Input (Homo sapiens)
Reference List:	Homo sapiens (all genes in database)
Bonferroni correction:	TRUE
Bonferroni count:	1316
GO cellular component complete	Homo sapiens - REFLIST (20972)	Client Text Box Input (13)	Client Text Box Input (expected)	Client Text Box Input (over/under)	Client Text Box Input (fold Enrichment)	Client Text Box Input (P-value)
exon-exon junction complex (GO:0035145)	22	4	0.01	+	> 100	1.13e-06
cytosolic large ribosomal subunit (GO:0022625)	63	4	0.04	+	> 100	7.5e-05
cytosolic ribosome (GO:0022626)	117	4	0.07	+	55.15	0.000876
large ribosomal subunit (GO:0015934)	118	4	0.07	+	54.69	0.000906
catalytic step 2 spliceosome (GO:0071013)	97	3	0.06	+	49.89	0.036
cytoplasmic ribonucleoprotein granule (GO:0036464)	180	4	0.11	+	35.85	0.0048
spliceosomal complex (GO:0005681)	185	4	0.11	+	34.88	0.00535
ribosomal subunit (GO:0044391)	190	4	0.12	+	33.96	0.00594
ribonucleoprotein granule (GO:0035770)	191	4	0.12	+	33.78	0.00606
cytosolic part (GO:0044445)	244	4	0.15	+	26.45	0.0159
ribosome (GO:0005840)	249	4	0.15	+	25.92	0.0172
intracellular ribonucleoprotein complex (GO:0030529)	818	10	0.51	+	19.72	2.75e-09
ribonucleoprotein complex (GO:1990904)	819	10	0.51	+	19.7	2.79e-09
Unclassified (UNCLASSIFIED)	2558	1	1.59	-	0.63	0

## Sheet: RNase_sensitive_MF
Analysis Type:	PANTHER Overrepresentation Test (release 20170413)
Annotation Version and Release Date:	GO Ontology database Released 2017-05-25
Analyzed List:	Client Text Box Input (Homo sapiens)
Reference List:	Homo sapiens (all genes in database)
Bonferroni correction:	TRUE
Bonferroni count:	3080
GO molecular function complete	Homo sapiens - REFLIST (20972)	Client Text Box Input (13)	Client Text Box Input (expected)	Client Text Box Input (over/under)	Client Text Box Input (fold Enrichment)	Client Text Box Input (P-value)
RNA binding (GO:0003723)	1619	13	1	+	12.95	1.07e-11
nucleic acid binding (GO:0003676)	4039	13	2.5	+	5.19	1.54e-06
organic cyclic compound binding (GO:0097159)	6045	13	3.75	+	3.47	0.000292
heterocyclic compound binding (GO:1901363)	5960	13	3.69	+	3.52	0.000243
structural constituent of ribosome (GO:0003735)	173	4	0.11	+	37.3	0.00961
selenocysteine insertion sequence binding (GO:0035368)	5	2	0	+	> 100	0.0136

## Sheet: RNase_insensitive_CC
Analysis Type:	PANTHER Overrepresentation Test (release 20170413)
Annotation Version and Release Date:	GO Ontology database Released 2017-05-25
Analyzed List:	Client Text Box Input (Homo sapiens)
Reference List:	Homo sapiens (all genes in database)
Bonferroni correction:	TRUE
Bonferroni count:	1316
GO cellular component complete	Homo sapiens - REFLIST (20972)	Client Text Box Input (14)	Client Text Box Input (expected)	Client Text Box Input (over/under)	Client Text Box Input (fold Enrichment)	Client Text Box Input (P-value)
nucleus (GO:0005634)	7061	14	4.71	+	2.97	0.000317
organelle lumen (GO:0043233)	4997	13	3.34	+	3.9	0.000114
intracellular organelle lumen (GO:0070013)	4997	13	3.34	+	3.9	0.000114
membrane-enclosed lumen (GO:0031974)	4997	13	3.34	+	3.9	0.000114
nuclear part (GO:0044428)	4255	12	2.84	+	4.22	0.000385
macromolecular complex (GO:0032991)	4892	11	3.27	+	3.37	0.0259
protein complex (GO:0043234)	3112	10	2.08	+	4.81	0.00382
intracellular non-membrane-bounded organelle (GO:0043232)	3970	10	2.65	+	3.77	0.0367
non-membrane-bounded organelle (GO:0043228)	3970	10	2.65	+	3.77	0.0367
nuclear lumen (GO:0031981)	3893	10	2.6	+	3.85	0.0306
intracellular vesicle (GO:0097708)	2180	8	1.46	+	5.5	0.0302
cytoplasmic vesicle (GO:0031410)	2177	8	1.45	+	5.5	0.0299
secretory granule (GO:0030141)	814	6	0.54	+	11.04	0.0103
secretory vesicle (GO:0099503)	930	6	0.62	+	9.66	0.0221
secretory granule lumen (GO:0034774)	320	5	0.21	+	23.41	0.00194
vacuolar part (GO:0044437)	540	5	0.36	+	13.87	0.0245
cytoplasmic vesicle lumen (GO:0060205)	336	5	0.22	+	22.29	0.00246
vesicle lumen (GO:0031983)	337	5	0.22	+	22.23	0.0025
melanosome (GO:0042470)	106	4	0.07	+	56.53	0.000826
protein-DNA complex (GO:0032993)	162	4	0.11	+	36.99	0.00441
ficolin-1-rich granule (GO:0101002)	185	4	0.12	+	32.39	0.00743
ficolin-1-rich granule lumen (GO:1904813)	124	4	0.08	+	48.32	0.00154
vacuolar lumen (GO:0005775)	168	4	0.11	+	35.67	0.00509
pigment granule (GO:0048770)	106	4	0.07	+	56.53	0.000826
nuclear replication fork (GO:0043596)	45	3	0.03	+	99.87	0.00465
replication fork (GO:0005657)	68	3	0.05	+	66.09	0.0159
replisome (GO:0030894)	31	3	0.02	+	> 100	0.00153

## Sheet: Tandem_ORF1-like_CC
Analysis Type:	PANTHER Overrepresentation Test (release 20170413)
Annotation Version and Release Date:	GO Ontology database Released 2017-05-25
Analyzed List:	Client Text Box Input (Homo sapiens)
Reference List:	Homo sapiens (all genes in database)
Bonferroni correction:	TRUE
Bonferroni count:	1316
GO cellular component complete	Homo sapiens - REFLIST (20972)	Client Text Box Input (5)	Client Text Box Input (expected)	Client Text Box Input (over/under)	Client Text Box Input (fold Enrichment)	Client Text Box Input (P-value)
cytoplasmic ribonucleoprotein granule (GO:0036464)	180	5	0.04	+	> 100	6.13e-08
ribonucleoprotein granule (GO:0035770)	191	5	0.05	+	> 100	8.25e-08
ribonucleoprotein complex (GO:1990904)	819	5	0.2	+	25.61	0.00012
intracellular ribonucleoprotein complex (GO:0030529)	818	5	0.2	+	25.64	0.000119
cytoplasmic stress granule (GO:0010494)	42	3	0.01	+	> 100	0.000105

## Sheet: Tandem_ORF2-like_CC
Analysis Type:	PANTHER Overrepresentation Test (release 20170413)
Annotation Version and Release Date:	GO Ontology database Released 2017-05-25
Analyzed List:	Client Text Box Input (Homo sapiens)
Reference List:	Homo sapiens (all genes in database)
Bonferroni correction:	TRUE
Bonferroni count:	1316
GO cellular component complete	Homo sapiens - REFLIST (20972)	Client Text Box Input (16)	Client Text Box Input (expected)	Client Text Box Input (over/under)	Client Text Box Input (fold Enrichment)	Client Text Box Input (P-value)
intracellular membrane-bounded organelle (GO:0043231)	10609	16	8.09	+	1.98	0.0242
nucleus (GO:0005634)	7061	16	5.39	+	2.97	3.59e-05
organelle lumen (GO:0043233)	4997	15	3.81	+	3.93	7.41e-06
intracellular organelle lumen (GO:0070013)	4997	15	3.81	+	3.93	7.41e-06
intracellular organelle part (GO:0044446)	8792	15	6.71	+	2.24	0.0278
organelle part (GO:0044422)	9004	15	6.87	+	2.18	0.0391
membrane-enclosed lumen (GO:0031974)	4997	15	3.81	+	3.93	7.41e-06
nuclear part (GO:0044428)	4255	14	3.25	+	4.31	2.08e-05
macromolecular complex (GO:0032991)	4892	13	3.73	+	3.48	0.00215
intracellular non-membrane-bounded organelle (GO:0043232)	3970	12	3.03	+	3.96	0.00236
non-membrane-bounded organelle (GO:0043228)	3970	12	3.03	+	3.96	0.00236
nuclear lumen (GO:0031981)	3893	12	2.97	+	4.04	0.00189
protein complex (GO:0043234)	3112	11	2.37	+	4.63	0.00213
vesicle (GO:0031982)	4221	11	3.22	+	3.42	0.0457
nucleoplasm (GO:0005654)	3298	10	2.52	+	3.97	0.0388
intracellular vesicle (GO:0097708)	2180	9	1.66	+	5.41	0.0108
cytoplasmic vesicle (GO:0031410)	2177	9	1.66	+	5.42	0.0106
secretory granule (GO:0030141)	814	6	0.62	+	9.66	0.0257
ribonucleoprotein complex (GO:1990904)	819	6	0.62	+	9.6	0.0266
intracellular ribonucleoprotein complex (GO:0030529)	818	6	0.62	+	9.61	0.0264
nuclear chromosome (GO:0000228)	508	5	0.39	+	12.9	0.0383
protein-DNA complex (GO:0032993)	162	5	0.12	+	40.46	0.000147
secretory granule lumen (GO:0034774)	320	5	0.24	+	20.48	0.00413
nuclear chromosome part (GO:0044454)	474	5	0.36	+	13.83	0.0275
cytoplasmic vesicle lumen (GO:0060205)	336	5	0.26	+	19.51	0.00524
vesicle lumen (GO:0031983)	337	5	0.26	+	19.45	0.00531
nuclear replication fork (GO:0043596)	45	4	0.03	+	> 100	4.97e-05
myelin sheath (GO:0043209)	173	4	0.13	+	30.31	0.0102
melanosome (GO:0042470)	106	4	0.08	+	49.46	0.00149
replication fork (GO:0005657)	68	4	0.05	+	77.1	0.000257
ficolin-1-rich granule (GO:0101002)	185	4	0.14	+	28.34	0.0133
ficolin-1-rich granule lumen (GO:1904813)	124	4	0.09	+	42.28	0.00277
vacuolar lumen (GO:0005775)	168	4	0.13	+	31.21	0.00913
pigment granule (GO:0048770)	106	4	0.08	+	49.46	0.00149
replisome (GO:0030894)	31	3	0.02	+	> 100	0.00235
